# Supplementary material for: Quantitative read-across structure–property relationship (q-RASPR): a novel approach to estimate the bioaccumulative potential for diverse classes of industrial chemicals in aquatic organisms
Source: Royal Society of Chemistry journal article supplement (doi:10.1039/d4em00374h), 2024-11-01
Supplement: d4em00374h1.xlsx [file d4em00374h1.xlsx]

## Sheet: Original Dataset
ID	CAS	Standardized	logBCF
1	98-81-7	BrC(=C)c1ccccc1	2.19
2	75-25-2	BrC(Br)Br	1.15
3	106-93-4	BrCCBr	0.59
4	78-63-7	CC(C)(C)OOC(C)(C)CCC(C)(C)OOC(C)(C)C	3.62
5	306-98-9	FC(F)(F)C1(F)C(F)(F)C(F)(F)C(F)(F)C(F)(F)C1(F)C(F)(F)F	3.92
6	328-84-7	FC(F)(F)c1ccc(Cl)c(Cl)c1	3.18
7	320-60-5	FC(F)(F)c1ccc(Cl)cc1Cl	3.51
8	98-15-7	FC(F)(F)c1cccc(Cl)c1	2.34
9	402-31-3	FC(F)(F)c1cccc(c1)C(F)(F)F	2.51
10	98-08-8	FC(F)(F)c1ccccc1	1.67
11	379-52-2	F[Sn](c1ccccc1)(c1ccccc1)c1ccccc1	3.66
12	19715-19-6	CC(C)(C)c1cc(C(O)=O)c(O)c(c1)C(C)(C)C	0.98
13	111-94-4	N#CCCNCCC#N	-0.36
14	21564-17-0	N#CSCSc1nc2ccccc2s1	2.07
15	623-26-7	N#Cc1ccc(cc1)C#N	0.24
16	626-17-5	N#Cc1cccc(c1)C#N	0.57
17	91-15-6	N#Cc1ccccc1C#N	0.4
18	93-46-9	N(c1ccc(Nc2ccc3ccccc3c2)cc1)c1ccc2ccccc2c1	3.28
19	74-31-7	N(c1ccccc1)c1ccc(Nc2ccccc2)cc1	3.13
20	135-88-6	N(c1ccccc1)c1ccc2ccccc2c1	2.37
21	90-30-2	N(c1ccccc1)c1cccc2ccccc12	3.23
22	6683-19-8	CC(C)(C)c1cc(CCC(=O)OCC(COC(=O)CCc2cc(c(O)c(c2)C(C)(C)C)C(C)(C)C)(COC(=O)CCc2cc(c(O)c(c2)C(C)(C)C)C(C)(C)C)COC(=O)CCc2cc(c(O)c(c2)C(C)(C)C)C(C)(C)C)cc(c1O)C(C)(C)C	-0.17
23	122-39-4	N(c1ccccc1)c1ccccc1	2.21
24	92-84-2	N1c2ccccc2Sc2ccccc12	2.63
25	102-06-7	N=C(Nc1ccccc1)Nc1ccccc1	0.8
26	461-58-5	NC(=N)NC#N	0.49
27	47095	NC(=O)C1CC=CCC1C(O)=O	0.54
28	123-77-3	NC(=O)N=NC(N)=O	1.18
29	360-97-4	NC(=O)c1[nH]cnc1N	0.72
30	56113-42-9	NC(=O)c1c(Cl)c(Cl)c(Cl)c(Cl)c1C(O)=O	0.49
31	88-26-6	CC(C)(C)c1cc(CO)cc(c1O)C(C)(C)C	1.52
32	62-56-6	NC(N)=S	0.3
33	1197-18-8	NCC1CCC(CC1)C(O)=O	1.01
34	111-40-0	NCCNCCN	0.34
35	112-24-3	NCCNCCNCCN	0.2
36	111-41-1	NCCNCCO	0.32
37	822775	NCCNCc1ccccc1	0.6
38	1477-55-0	NCc1cccc(CN)c1	-0.04
39	79-19-6	NNC(N)=S	1.1
40	80-51-3	NNS(=O)(=O)c1ccc(Oc2ccc(cc2)S(=O)(=O)NN)cc1	-0.02
41	118-82-1	CC(C)(C)c1cc(Cc2cc(c(O)c(c2)C(C)(C)C)C(C)(C)C)cc(c1O)C(C)(C)C	3.28
42	98-10-2	NS(=O)(=O)c1ccccc1	0.52
43	527-20-8	Nc1c(Cl)c(Cl)c(Cl)c(Cl)c1Cl	2.94
44	3481-20-7	Nc1c(Cl)c(Cl)cc(Cl)c1Cl	2.78
45	634-93-5	Nc1c(Cl)cc(Cl)cc1Cl	2.12
46	123251-96-7	Nc1c(Cl)cc(cc1S(O)(=O)=O)-c1cc(Cl)c(N)c(c1)S(O)(=O)=O	0.2
47	3531-19-9	Nc1c(Cl)cc(cc1[N+]([O-])=O)[N+]([O-])=O	1.04
48	17095-24-8	Nc1c(N=Nc2ccc(cc2)S(=O)(=O)CCOS(O)(=O)=O)c(cc2cc(c(N=Nc3ccc(cc3)S(=O)(=O)CCOS(O)(=O)=O)c(O)c12)S(O)(=O)=O)S(O)(=O)=O	1.04
49	59722-76-8	Nc1c(Oc2ccc(Br)cc2)cc(O)c2C(=O)c3ccccc3C(=O)c12	2.05
50	52789-62-5	Nc1c(cc(c2cccc(O)c12)S(O)(=O)=O)S(O)(=O)=O	0.9
51	27676-62-6	CC(C)(C)c1cc(Cn2c(=O)n(Cc3cc(c(O)c(c3)C(C)(C)C)C(C)(C)C)c(=O)n(Cc3cc(c(O)c(c3)C(C)(C)C)C(C)(C)C)c2=O)cc(c1O)C(C)(C)C	0.27
52	1591885	Nc1c2C(=O)c3ccccc3C(=O)c2c(Br)cc1S(O)(=O)=O	0.17
53	2580-78-1	Nc1c2C(=O)c3ccccc3C(=O)c2c(Nc2cccc(c2)S(=O)(=O)CCOS(O)(=O)=O)cc1S(O)(=O)=O	0.6
54	634-91-3	Nc1cc(Cl)c(Cl)c(Cl)c1	2.36
55	634-83-3	Nc1cc(Cl)c(Cl)c(Cl)c1Cl	2.45
56	636-30-6	Nc1cc(Cl)c(Cl)cc1Cl	2.33
57	95-82-9	Nc1cc(Cl)ccc1Cl	1.22
58	351002	Nc1cc(c(O)c2C(=O)c3c(N)cc(c(O)c3C(=O)c12)S(O)(=O)=O)S(O)(=O)=O	0.31
59	1300333	Nc1cc(cc2cc(cc(O)c12)S(O)(=O)=O)S(O)(=O)=O	0.46
60	25394-13-2	Nc1ccc(C=Cc2ccc(N)cc2S(O)(=O)=O)c(c1)S(O)(=O)=O	0.28
61	52184-14-2	CC(C)(C)c1cc(N=Nc2ccccc2[N+]([O-])=O)c(O)c(c1)C(C)(C)C	3.68
62	101-14-4	Nc1ccc(Cc2ccc(N)c(Cl)c2)cc1Cl	2.39
63	42240-73-3	Nc1ccc(Cc2ccc(N)c(Cl)c2Cl)c(Cl)c1Cl	3.43
64	101-77-9	Nc1ccc(Cc2ccc(N)cc2)cc1	1
65	95-76-1	Nc1ccc(Cl)c(Cl)c1	1.13
66	634-67-3	Nc1ccc(Cl)c(Cl)c1Cl	2
67	106-47-8	Nc1ccc(Cl)cc1	0.71
68	554-00-7	Nc1ccc(Cl)cc1Cl	1.4
69	89-63-4	Nc1ccc(Cl)cc1[N+]([O-])=O	1.03
70	106-50-3	Nc1ccc(N)cc1	1.8
71	123-30-8	Nc1ccc(O)cc1	1.62
72	3864-99-1	CC(C)(C)c1cc(c(O)c(c1)C(C)(C)C)-n1nc2ccc(Cl)cc2n1	3.57
73	130-13-2	Nc1ccc(c2ccccc12)S(O)(=O)=O	0.78
74	60-09-3	Nc1ccc(cc1)N=Nc1ccccc1	1.56
75	121-57-3	Nc1ccc(cc1)S(O)(=O)=O	0.04
76	100-01-6	Nc1ccc(cc1)[N+]([O-])=O	0.6
77	91-94-1	Nc1ccc(cc1Cl)-c1ccc(N)c(Cl)c1	2.26
78	117-79-3	Nc1ccc2C(=O)c3ccccc3C(=O)c2c1	1.57
79	87-02-5	Nc1ccc2c(O)cc(cc2c1)S(O)(=O)=O	0.38
80	90-51-7	Nc1ccc2cc(cc(O)c2c1)S(O)(=O)=O	0.16
81	81-16-3	Nc1ccc2ccccc2c1S(O)(=O)=O	0.78
82	108-42-9	Nc1cccc(Cl)c1	0.32
83	3846-71-7	CC(C)(C)c1cc(c(O)c(c1)C(C)(C)C)-n1nc2ccccc2n1	3.74
84	108-45-2	Nc1cccc(N)c1	0.8
85	591-27-5	Nc1cccc(O)c1	1.34
86	UNK-07	Nc1cccc(c1)N(CCO)CCO	0.08
87	599-61-1	Nc1cccc(c1)S(=O)(=O)c1cccc(N)c1	0.46
88	99-09-2	Nc1cccc(c1)[N+]([O-])=O	0.48
89	82-45-1	Nc1cccc2C(=O)c3ccccc3C(=O)c12	2.04
90	2243-62-1	Nc1cccc2c(N)cccc12	0.46
91	479-27-6	Nc1cccc2cccc(N)c12	0.75
92	134-32-7	Nc1cccc2ccccc12	1.43
93	62-53-3	Nc1ccccc1	0.31
94	732-26-3	CC(C)(C)c1cc(c(O)c(c1)C(C)(C)C)C(C)(C)C	4.14
95	90-41-5	Nc1ccccc1-c1ccccc1	1.42
96	95-51-2	Nc1ccccc1Cl	0.91
97	88-74-4	Nc1ccccc1[N+]([O-])=O	0.82
98	504-29-0	Nc1ccccn1	1.04
99	462-08-8	Nc1cccnc1	-0.19
100	504-24-5	Nc1ccncc1	0.65
101	108-78-1	Nc1nc(N)nc(N)n1	0.58
102	96-50-4	Nc1nccs1	0.06
103	4101-68-2	BrCCCCCCCCCCBr	2.06
104	1460-02-2	CC(C)(C)c1cc(cc(c1)C(C)(C)C)C(C)(C)C	4.37
105	61-82-5	Nc1nnc[nH]1	0.24
106	101-84-8	O(c1ccccc1)c1ccccc1	2.54
107	2387-23-7	O=C(NC1CCCCC1)NC1CCCCC1	0.1
108	120-52-5	O=C(ON=C1C=CC(C=C1)=NOC(=O)c1ccccc1)c1ccccc1	0.62
109	2668-47-5	CC(C)(C)c1cc(cc(c1O)C(C)(C)C)-c1ccccc1	3.94
110	119-61-9	O=C(c1ccccc1)c1ccccc1	0.91
111	482-89-3	O=C1C(Nc2ccccc12)=C1Nc2ccccc2C1=O	0.4
112	184908	O=C1C=CC(C=C1)=Nc1ccccc1	1.3
113	1502-22-3	O=C1CCCCC1C1=CCCCC1	0.6
114	947-04-6	O=C1CCCCCCCCCCCN1	0.28
115	57-41-0	O=C1NC(=O)C(N1)(c1ccccc1)c1ccccc1	0.54
116	85-41-6	O=C1NC(=O)c2ccccc12	1.14
117	82-05-3	O=C1c2ccccc2-c2cccc3cccc1c23	2.12
118	2498-66-0	O=C1c2ccccc2C(=O)c2c1ccc1ccccc21	1.63
119	101-68-8	O=C=Nc1ccc(Cc2ccc(cc2)N=C=O)cc1	2.35
120	86-30-6	O=NN(c1ccccc1)c1ccccc1	1.48
121	26076-28-8	O=Nc1c(O[Co](Oc2ccc3ccccc3c2N=O)Oc2ccc3ccccc3c2N=O)ccc2ccccc12	1.79
122	115-86-6	O=P(Oc1ccccc1)(Oc1ccccc1)Oc1ccccc1	2.4
123	126-33-0	O=S1(=O)CCCC1	0.61
124	96-76-4	CC(C)(C)c1ccc(O)c(c1)C(C)(C)C	2.45
125	108-80-5	O=c1[nH]c(=O)[nH]c(=O)[nH]1	-0.65
126	123-33-1	O=c1ccc(=O)[nH][nH]1	-0.2
127	526-78-3	OC(=O)C(Br)C(Br)C(O)=O	0.62
128	21348-16-3	OC(=O)C(Cl)(Cl)Cl	0.03
129	16517-11-6	OC(=O)C(F)(F)C(F)(F)C(F)(F)C(F)(F)C(F)(F)C(F)(F)C(F)(F)C(F)(F)C(F)(F)C(F)(F)C(F)(F)C(F)(F)C(F)(F)C(F)(F)C(F)(F)C(F)(F)C(F)(F)F	2.66
130	67905-19-5	OC(=O)C(F)(F)C(F)(F)C(F)(F)C(F)(F)C(F)(F)C(F)(F)C(F)(F)C(F)(F)C(F)(F)C(F)(F)C(F)(F)C(F)(F)C(F)(F)C(F)(F)C(F)(F)F	3.76
131	376-06-7	OC(=O)C(F)(F)C(F)(F)C(F)(F)C(F)(F)C(F)(F)C(F)(F)C(F)(F)C(F)(F)C(F)(F)C(F)(F)C(F)(F)C(F)(F)C(F)(F)F	4.4
132	307-55-1	OC(=O)C(F)(F)C(F)(F)C(F)(F)C(F)(F)C(F)(F)C(F)(F)C(F)(F)C(F)(F)C(F)(F)C(F)(F)C(F)(F)F	4.36
133	2058-94-8	OC(=O)C(F)(F)C(F)(F)C(F)(F)C(F)(F)C(F)(F)C(F)(F)C(F)(F)C(F)(F)C(F)(F)C(F)(F)F	3.54
134	98-54-4	CC(C)(C)c1ccc(O)cc1	1.83
135	335-67-1	OC(=O)C(F)(F)C(F)(F)C(F)(F)C(F)(F)C(F)(F)C(F)(F)C(F)(F)F	0.98
136	2-4059	OC(=O)C(F)(F)OC(F)(F)C(F)(F)OC(F)(F)C(F)(F)F	0.76
137	76-93-7	OC(=O)C(O)(c1ccccc1)c1ccccc1	0.26
138	115-28-6	OC(=O)C1C(C(O)=O)C2(Cl)C(Cl)=C(Cl)C1(Cl)C2(Cl)Cl	0.32
139	88-98-2	OC(=O)C1CC=CCC1C(O)=O	0.3
140	610-09-3	OC(=O)C1CCCCC1C(O)=O	0.3
141	UNK-19	CC(C)(C)c1ccc(OP(=O)(Oc2ccccc2)Oc2ccccc2)cc1	3.2
142	139-13-9	OC(=O)CN(CC(O)=O)CC(O)=O	1.75
143	60-00-4	OC(=O)CN(CCN(CC(O)=O)CC(O)=O)CC(O)=O	1.08
144	1071-83-6	OC(=O)CNCP(O)(O)=O	1.35
145	94-75-7	OC(=O)COc1ccc(Cl)cc1Cl	0.5
146	86-87-3	OC(=O)Cc1cccc2ccccc12	0.29
147	1934-21-0	OC(=O)c1[nH]n(-c2ccc(cc2)S(O)(=O)=O)c(=O)c1N=Nc1ccc(cc1)S(O)(=O)=O	-0.03
148	50-31-7	OC(=O)c1c(Cl)ccc(Cl)c1Cl	0.54
149	98-73-7	CC(C)(C)c1ccc(cc1)C(O)=O	0.34
150	50-30-6	OC(=O)c1c(Cl)cccc1Cl	-0.15
151	92-70-6	OC(=O)c1cc2ccccc2cc1O	0.46
152	51-44-5	OC(=O)c1ccc(Cl)c(Cl)c1	0.36
153	7267-11-0	OC(=O)c1ccc(Cl)c2c(Cl)ccc(C(O)=O)c12	-0.01
154	74-11-3	OC(=O)c1ccc(Cl)cc1	1.08
155	100-26-5	OC(=O)c1ccc(nc1)C(O)=O	0.56
156	1141-38-4	OC(=O)c1ccc2cc(ccc2c1)C(O)=O	0.64
157	121-92-6	OC(=O)c1cccc(c1)[N+]([O-])=O	0.85
158	84-47-9	CC(C)(C)c1ccc2C(=O)c3ccccc3C(=O)c2c1	2.48
159	603-11-2	OC(=O)c1cccc(c1C(O)=O)[N+]([O-])=O	0.71
160	65-85-0	OC(=O)c1ccccc1	0.93
161	118-91-2	OC(=O)c1ccccc1Cl	1
162	920-66-1	OC(C(F)(F)F)C(F)(F)F	0.3
163	115-32-2	OC(c1ccc(Cl)cc1)(c1ccc(Cl)cc1)C(Cl)(Cl)Cl	3.79
164	119-56-2	OC(c1ccccc1)c1ccc(Cl)cc1	1.82
165	3296-90-0	OCC(CO)(CBr)CBr	0.17
166	88-18-6	CC(C)(C)c1ccccc1O	1.94
167	115-77-5	OCC(CO)(CO)CO	-0.04
168	126-58-9	OCC(CO)(CO)COCC(CO)(CO)CO	0.31
169	307-70-0	OCC(F)(F)C(F)(F)C(F)(F)C(F)(F)C(F)(F)C(F)(F)C(F)(F)C(F)(F)C(F)(F)C(F)F	3.36
170	335-99-9	OCC(F)(F)C(F)(F)C(F)(F)C(F)(F)C(F)(F)C(F)F	1.36
171	355-80-6	OCC(F)(F)C(F)(F)C(F)(F)C(F)F	0.97
172	59365-60-5	OCC(O)c1ccccc1Cl	0.4
173	678-39-7	OCCC(F)(F)C(F)(F)C(F)(F)C(F)(F)C(F)(F)C(F)(F)C(F)(F)C(F)(F)F	2.76
174	102-71-6	OCCN(CCO)CCO	0.1
175	87-82-1	Brc1c(Br)c(Br)c(Br)c(Br)c1Br	2.99
176	UNK-12	OCCN(CCO)c1nc(Nc2ccc(cc2)S(O)(=O)=O)nc(Nc2ccc(C=Cc3ccc(Nc4nc(Nc5cccc(c5)S(O)(=O)=O)nc(n4)N(CCO)CCO)cc3S(O)(=O)=O)c(c2)S(O)(=O)=O)n1	0.1
177	839-90-7	OCCn1c(=O)n(CCO)c(=O)n(CCO)c1=O	0.2
178	15258-73-8	OCc1c(Cl)cccc1Cl	0.39
179	54135-81-8	OCc1cc(Cl)cc(Cl)c1Cl	3.09
180	1805-32-9	OCc1ccc(Cl)c(Cl)c1	0.45
181	873-63-2	OCc1cccc(Cl)c1	1.3
182	4883-72-1	ON(N=O)C1CCCCC1	0.44
183	1779-48-2	OP(=O)c1ccccc1	0.29
184	306-52-5	OP(O)(=O)OCC(Cl)(Cl)Cl	0.08
185	2795-39-3	OS(=O)(=O)C(F)(F)C(F)(F)C(F)(F)C(F)(F)C(F)(F)C(F)(F)C(F)(F)C(F)(F)F	2.93
186	3871-99-6	OS(=O)(=O)C(F)(F)C(F)(F)C(F)(F)C(F)(F)C(F)(F)C(F)(F)F	2.61
187	26545-58-4	OS(=O)(=O)c1c(Cc2ccc3ccccc3c2S(O)(=O)=O)ccc2ccccc12	0.44
188	24019-05-4	OS(=O)(=O)c1cc(Cl)ccc1Oc1ccc(Cl)cc1NC(=O)Nc1ccc(Cl)c(Cl)c1	1.87
189	16090-02-1	OS(=O)(=O)c1cc(Nc2nc(Nc3ccccc3)nc(n2)N2CCOCC2)ccc1C=Cc1ccc(Nc2nc(Nc3ccccc3)nc(n2)N2CCOCC2)cc1S(O)(=O)=O	1.12
190	946-30-5	OS(=O)(=O)c1cc(ccc1Cl)[N+]([O-])=O	0.48
191	2611-82-7	OS(=O)(=O)c1cc2C=CC(=O)C(=NNc3ccc(c4ccccc34)S(O)(=O)=O)c2c(c1)S(O)(=O)=O	0.24
192	2695-37-6	OS(=O)(=O)c1ccc(C=C)cc1	0.1
193	127-68-4	OS(=O)(=O)c1cccc(c1)[N+]([O-])=O	0.7
194	791-31-1	O[Si](c1ccccc1)(c1ccccc1)c1ccccc1	2.82
195	6362-80-7	CC(C)(CC(=C)c1ccccc1)c1ccccc1	3.58
196	76-87-9	O[Sn](c1ccccc1)(c1ccccc1)c1ccccc1	3.78
197	608-71-9	Oc1c(Br)c(Br)c(Br)c(Br)c1Br	0.79
198	118-79-6	Oc1c(Br)cc(Br)cc1Br	2.71
199	1689-84-5	Oc1c(Br)cc(cc1Br)C#N	1.25
200	87-86-5	Oc1c(Cl)c(Cl)c(Cl)c(Cl)c1Cl	2.45
201	935-95-5	Oc1c(Cl)c(Cl)cc(Cl)c1Cl	2.15
202	70-30-4	Oc1c(Cl)cc(Cl)c(Cl)c1Cc1c(O)c(Cl)cc(Cl)c1Cl	2.07
203	58-90-2	Oc1c(Cl)cc(Cl)c(Cl)c1Cl	1.98
204	2050-76-2	Oc1c(Cl)cc(Cl)c2ccccc12	1.18
205	88-06-2	Oc1c(Cl)cc(Cl)cc1Cl	1.94
206	126-30-7	CC(C)(CO)CO	0.16
207	609-89-2	Oc1c(Cl)cc(Cl)cc1[N+]([O-])=O	1.32
208	87-65-0	Oc1c(Cl)cccc1Cl	1.08
209	88-89-1	Oc1c(cc(cc1[N+]([O-])=O)[N+]([O-])=O)[N+]([O-])=O	0.34
210	4821-19-6	Oc1c(cccc1C1CCCCC1)C1CCCCC1	3.02
211	10319-14-9	Oc1c(nc2ccccc2c1Br)C1C(=O)c2ccccc2C1=O	1.08
212	1940-42-7	Oc1cc(Cl)c(Br)cc1Cl	2.22
213	95-95-4	Oc1cc(Cl)c(Cl)cc1Cl	2.73
214	591-35-5	Oc1cc(Cl)cc(Cl)c1	1.91
215	583-78-8	Oc1cc(Cl)ccc1Cl	1.2
216	3380-34-5	Oc1cc(Cl)ccc1Oc1ccc(Cl)cc1Cl	1.72
217	20324-87-2	Oc1cc(cc2cc(NC(=O)Nc3ccc4c(O)cc(cc4c3)S(O)(=O)=O)ccc12)S(O)(=O)=O	-0.23
218	135-51-3	Oc1cc2ccc(cc2cc1S(O)(=O)=O)S(O)(=O)=O	0.11
219	92-77-3	Oc1cc2ccccc2cc1C(=O)Nc1ccccc1	0.77
220	106-41-2	Oc1ccc(Br)cc1	1.17
221	615-58-7	Oc1ccc(Br)cc1Br	1.45
222	620-92-8	Oc1ccc(Cc2ccc(O)cc2)cc1	1.08
223	101-53-1	Oc1ccc(Cc2ccccc2)cc1	1.42
224	95-77-2	Oc1ccc(Cl)c(Cl)c1	1.77
225	57-15-8	CC(C)(O)C(Cl)(Cl)Cl	0.26
226	106-48-9	Oc1ccc(Cl)cc1	1.42
227	97-23-4	Oc1ccc(Cl)cc1Cc1cc(Cl)ccc1O	2.1
228	120-83-2	Oc1ccc(Cl)cc1Cl	1.74
229	12217-77-5	Oc1ccc(Nc2ccccc2)c2C(=O)c3c(C(=O)c12)c(O)ccc3[N+]([O-])=O	1.29
230	6099-57-6	Oc1ccc(c2ccccc12)S(O)(=O)=O	1.11
231	92-88-6	Oc1ccc(cc1)-c1ccc(O)cc1	1.52
232	92-69-3	Oc1ccc(cc1)-c1ccccc1	1.66
233	767-00-0	Oc1ccc(cc1)C#N	0.91
234	80-43-3	CC(C)(OOC(C)(C)c1ccccc1)c1ccccc1	2.72
235	843-55-0	Oc1ccc(cc1)C1(CCCCC1)c1ccc(O)cc1	1.6
236	80-09-1	Oc1ccc(cc1)S(=O)(=O)c1ccc(O)cc1	-0.18
237	100-02-7	Oc1ccc(cc1)[N+]([O-])=O	0.71
238	51-28-5	Oc1ccc(cc1[N+]([O-])=O)[N+]([O-])=O	0.57
239	842-18-2	Oc1ccc2cc(cc(c2c1)S(O)(=O)=O)S(O)(=O)=O	0
240	591-20-8	Oc1cccc(Br)c1	1.03
241	108-43-0	Oc1cccc(Cl)c1	1.12
242	576-24-9	Oc1cccc(Cl)c1Cl	1.31
243	554-84-7	Oc1cccc(c1)[N+]([O-])=O	1.4
244	3618-60-8	Oc1cccc2C(=O)C(C=Cc12)=NNc1cc(Cl)cc(c1O)S(O)(=O)=O	0.39
245	79-94-7	CC(C)(c1cc(Br)c(O)c(Br)c1)c1cc(Br)c(O)c(Br)c1	2.43
246	129-43-1	Oc1cccc2C(=O)c3ccccc3C(=O)c12	2.32
247	148-24-3	Oc1cccc2cccnc12	1.12
248	108-95-2	Oc1ccccc1	1.24
249	95-56-7	Oc1ccccc1Br	1.52
250	25485-88-5	Oc1ccccc1C(=O)OC1CCCCC1	2.88
251	95-57-8	Oc1ccccc1Cl	1.36
252	88-75-5	Oc1ccccc1[N+]([O-])=O	1.34
253	5586-15-2	S(Sc1ccc2ccccc2c1)c1ccc2ccccc2c1	0.34
254	882-33-7	S(Sc1ccccc1)c1ccccc1	0.9
255	21850-44-2	CC(C)(c1cc(Br)c(OCC(Br)CBr)c(Br)c1)c1cc(Br)c(OCC(Br)CBr)c(Br)c1	1.68
256	120-78-5	S(Sc1nc2ccccc2s1)c1nc2ccccc2s1	1.28
257	1212-29-9	S=C(NC1CCCCC1)NC1CCCCC1	0.64
258	120-54-7	S=C(SSSSC(=S)N1CCCCC1)N1CCCCC1	1.12
259	96-45-7	S=C1NCCN1	0.26
260	75-15-0	S=C=S	1.29
261	583-39-1	S=c1[nH]c2ccccc2[nH]1	0.41
262	149-30-4	S=c1[nH]c2ccccc2s1	0.4
263	1163-19-5	Brc1c(Br)c(Br)c(Oc2c(Br)c(Br)c(Br)c(Br)c2Br)c(Br)c1Br	1.17
264	4162-45-2	CC(C)(c1cc(Br)c(OCCO)c(Br)c1)c1cc(Br)c(OCCO)c(Br)c1	2.17
265	121-82-4	[O-][N+](=O)N1CN(CN(C1)[N+]([O-])=O)[N+]([O-])=O	0.3
266	80-05-7	CC(C)(c1ccc(O)cc1)c1ccc(O)cc1	1.39
267	82-68-8	[O-][N+](=O)c1c(Cl)c(Cl)c(Cl)c(Cl)c1Cl	2.48
268	117-18-0	[O-][N+](=O)c1c(Cl)c(Cl)cc(Cl)c1Cl	3.26
269	18708-70-8	[O-][N+](=O)c1c(Cl)cc(Cl)cc1Cl	2.71
270	879-39-0	[O-][N+](=O)c1cc(Cl)c(Cl)c(Cl)c1Cl	1.87
271	89-69-0	[O-][N+](=O)c1cc(Cl)c(Cl)cc1Cl	1.83
272	71767-67-4	[O-][N+](=O)c1cc(Cl)c(N=Nc2ccc(cc2)N(CCC#N)CCC#N)c(Cl)c1	1.63
273	618-62-2	[O-][N+](=O)c1cc(Cl)cc(Cl)c1	2.23
274	89-61-2	[O-][N+](=O)c1cc(Cl)ccc1Cl	2.04
275	5124-25-4	[O-][N+](=O)c1cc(ccc1Nc1ccccc1)S(=O)(=O)Nc1ccccc1	1.61
276	99-54-7	[O-][N+](=O)c1ccc(Cl)c(Cl)c1	1.98
277	17700-09-3	[O-][N+](=O)c1ccc(Cl)c(Cl)c1Cl	2.19
278	97-00-7	[O-][N+](=O)c1ccc(Cl)c(c1)[N+]([O-])=O	1.13
279	100-00-5	[O-][N+](=O)c1ccc(Cl)cc1	1.53
280	118-83-2	[O-][N+](=O)c1ccc(Cl)cc1C(F)(F)F	1.96
281	611-06-3	[O-][N+](=O)c1ccc(Cl)cc1Cl	2.06
282	1836-77-7	[O-][N+](=O)c1ccc(Oc2c(Cl)cc(Cl)cc2Cl)cc1	3.31
283	1836-75-5	[O-][N+](=O)c1ccc(Oc2ccc(Cl)cc2Cl)cc1	3.68
284	901-44-0	CC(C)(c1ccc(OCCO)cc1)c1ccc(OCCO)cc1	1.18
285	40690-89-9	[O-][N+](=O)c1ccc(cc1)N=Nc1ccc(cc1)N(CCOC(=O)c1ccccc1)CCC#N	0.94
286	94-52-0	[O-][N+](=O)c1ccc2nc[nH]c2c1	0.33
287	121-73-3	[O-][N+](=O)c1cccc(Cl)c1	1.89
288	3209-22-1	[O-][N+](=O)c1cccc(Cl)c1Cl	2.15
289	98-95-3	[O-][N+](=O)c1ccccc1	0.67
290	88-73-3	[O-][N+](=O)c1ccccc1Cl	1.88
291	25154-54-5	[O-][N+](=O)c1ccccc1[N+]([O-])=O	1.02
292	13463-41-7	[O-][n+]1ccccc1S[Zn]Sc1cccc[n+]1[O-]	2.32
293	10081-67-1	CC(C)(c1ccccc1)c1ccc(Nc2ccc(cc2)C(C)(C)c2ccccc2)cc1	1.92
294	948-65-2	c1c([nH]c2ccccc12)-c1ccccc1	2.56
295	129-00-0	c1cc2ccc3cccc4ccc(c1)c2c34	2.87
296	26140-60-3	c1ccc(cc1)-c1ccc(cc1)-c1ccccc1	1.84
297	92-06-8	c1ccc(cc1)-c1cccc(c1)-c1ccccc1	1.33
298	92-52-4	c1ccc(cc1)-c1ccccc1	2.77
299	599-64-4	CC(C)(c1ccccc1)c1ccc(O)cc1	2.28
300	84-15-1	c1ccc(cc1)-c1ccccc1-c1ccccc1	3.29
301	595-90-4	c1ccc(cc1)[Sn](c1ccccc1)(c1ccccc1)c1ccccc1	4.26
302	206-44-0	c1ccc-2c(c1)-c1cccc3cccc-2c13	3.55
303	86-74-8	c1ccc2c(c1)[nH]c1ccccc21	2.19
304	50-32-8	c1ccc2c(c1)cc1ccc3cccc4ccc2c1c34	2.83
305	218-01-9	c1ccc2c(c1)ccc1c3ccccc3ccc21	2.4
306	85-01-8	c1ccc2c(c1)ccc1ccccc21	3.3
307	226-36-8	c1ccc2c(c1)ccc1nc3c(ccc4ccccc34)cc21	2.03
308	471-77-2	CC(C)=C1CCC2C(CCC3C2(C)CCCC3(C)C(O)=O)=C1	2.11
309	132-64-9	c1ccc2c(c1)oc1ccccc21	3.22
310	132-65-0	c1ccc2c(c1)sc1ccccc21	3.17
311	56-55-3	c1ccc2cc3c(ccc4ccccc34)cc2c1	2.54
312	120-12-7	c1ccc2cc3ccccc3cc2c1	3.26
313	91-20-3	c1ccc2ccccc2c1	2.45
314	95-14-7	c1ccc2n[nH]nc2c1	0.83
315	260-94-6	c1ccc2nc3ccccc3cc2c1	2.5
316	91-22-5	c1ccc2ncccc2c1	0.49
317	71-43-2	c1ccccc1	0.64
318	7756-94-7	CC(C)=CC(C)(C)CC(C)(C)C	3.42
319	110-00-9	c1ccoc1	0.5
320	110-02-1	c1ccsc1	0.86
321	95-16-9	c1nc2ccccc2s1	0.76
322	584-79-2	CC(C)=CC1C(C(=O)OC2CC(=O)C(CC=C)=C2C)C1(C)C	2.26
323	13654-09-6	Brc1c(Br)c(Br)c(c(Br)c1Br)-c1c(Br)c(Br)c(Br)c(Br)c1Br	0.64
324	764-13-6	CC(C)=CC=C(C)C	2.42
325	66230-04-4	CC(C)C(C(=O)OC(C#N)c1cccc(Oc2ccccc2)c1)c1ccc(Cl)cc1	2.82
326	144-19-4	CC(C)C(O)C(C)(C)CO	-0.1
327	UNK-15	CC(C)C12CCC(C)(C=C1)C(C2C(O)=O)C(O)=O	0.1
328	1945-53-5	CC(C)C1=CC2=C(CC1)C1(C)CCCC(C)(C1CC2)C(O)=O	1.4
329	514-10-3	CC(C)C1=CC2=CCC3C(C)(CCCC3(C)C(O)=O)C2CC1	1.91
330	1490-04-6	CC(C)C1CCC(C)CC1O	0.89
331	54352-93-1	CC(C)C1CCC2CCCCC2C1	3.81
332	540-84-1	CC(C)CC(C)(C)C	2.78
333	36483-60-0	Brc1cc(Br)c(Br)c(Oc2ccc(Br)c(Br)c2Br)c1	3.14
334	26761-40-0	CC(C)CCCCCCCOC(=O)c1ccccc1C(=O)OCCCCCCCC(C)C	1.01
335	29761-21-5	CC(C)CCCCCCCOP(=O)(Oc1ccccc1)Oc1ccccc1	2.63
336	84852-15-3	CC(C)CCCCCCc1ccc(O)cc1	2.51
337	544-01-4	CC(C)CCOCCC(C)C	2.29
338	10315-98-7	CC(C)CN1CCOCC1	0.23
339	2173-57-1	CC(C)COc1ccc2ccccc2c1	2.9
340	36734-19-7	CC(C)NC(=O)N1CC(=O)N(C1=O)c1cc(Cl)cc(Cl)c1	2.48
341	14233-37-5	CC(C)Nc1ccc(NC(C)C)c2C(=O)c3ccccc3C(=O)c12	3.85
342	636-28-2	Brc1cc(Br)c(Br)cc1Br	3.66
343	50512-35-1	CC(C)OC(=O)C(C(=O)OC(C)C)=C1SCCS1	1.57
344	52303-69-2	CC(C)OC(=O)C(C(=O)OC(C)C)=C1SCCS1=O	-0.79
345	174300-34-6	CC(C)OC(=O)C(Cl)(Cl)C(=O)OC(C)C	-0.21
346	nd	CC(C)OC(=O)C(Cl)C(=O)OC(C)C	-0.68
347	26087-47-8	CC(C)OP(=O)(OC(C)C)SCc1ccccc1	0.95
348	19666-30-9	CC(C)Oc1cc(c(Cl)cc1Cl)-n1nc(oc1=O)C(C)(C)C	2.86
349	66332-96-5	CC(C)Oc1cccc(NC(=O)c2ccccc2C(F)(F)F)c1	1.31
350	79-46-9	CC(C)[N+]([O-])=O	0.86
351	36355-01-8	Brc1cc(Br)c(c(Br)c1)-c1c(Br)cc(Br)cc1Br	4.66
352	35860-37-8	CC(C)c1cc(C(C)C)c2cccc(C(C)C)c2c1	3.91
353	65310-45-4	CC(C)c1cc2CCC3C(C)(CCCC3(C)c2cc1Cl)C(O)=O	1.67
354	1322-93-6	CC(C)c1cc2ccccc2c(c1C(C)C)S(O)(=O)=O	0.46
355	89-83-8	CC(C)c1ccc(C)cc1O	1.48
356	99-88-7	CC(C)c1ccc(N)cc1	1.03
357	25321-09-9	CC(C)c1ccc(cc1)C(C)C	3.26
358	1740-19-8	CC(C)c1ccc2c(CCC3C(C)(CCCC23C)C(O)=O)c1	2.26
359	65281-76-7	CC(C)c1ccc2c(CCC3C(C)(CCCC23C)C(O)=O)c1Cl	1.57
360	59080-33-0	Brc1cc(Br)c(c(Br)c1)-c1ccccc1	3.87
361	2027-17-0	CC(C)c1ccc2ccccc2c1	4.11
362	38640-62-9	CC(C)c1ccc2ccccc2c1C(C)C	3.45
363	2078-54-8	CC(C)c1cccc(C(C)C)c1O	1.54
364	535-77-3	CC(C)c1cccc(C)c1	2.73
365	99-62-7	CC(C)c1cccc(c1)C(C)C	3.1
366	29253-36-9	CC(C)c1cccc2ccccc12	2.88
367	98-82-8	CC(C)c1ccccc1	1.55
368	577-55-9	CC(C)c1ccccc1C(C)C	2.14
369	79-27-6	BrC(Br)C(Br)Br	0.74
370	626-39-1	Brc1cc(Br)cc(Br)c1	3.84
371	26967-76-0	CC(C)c1ccccc1OP(=O)(Oc1ccccc1C(C)C)Oc1ccccc1C(C)C	1.5
372	2814-20-2	CC(C)c1nc(=O)cc(C)[nH]1	0.14
373	13475-82-6	CC(CC(C)(C)C)CC(C)(C)C	3.1
374	909554	CC(CC(C)(C)C)CC(C)(C)CC(C)(C)C	1.92
375	512345	CC(CC(O)=O)CC(C)(C)C	0.54
376	UNK-08	CC(CCC(COS(O)(=O)=O)C(C)CC(C)(C)C)CC(C)(C)C	2.15
377	3452-97-9	CC(CCO)CC(C)(C)C	0.86
378	108-60-1	CC(CCl)OC(C)CCl	0.96
379	13674-84-5	CC(CCl)OP(=O)(OC(C)CCl)OC(C)CCl	0.49
380	615-54-3	Brc1ccc(Br)c(Br)c1	3.45
381	52186-00-2	CC(CCl)OP(=O)(OCCOCCOP(=O)(OC(C)CCl)OC(C)CCl)OC(C)CCl	0.02
382	25791-96-2	CC(CO)OC(C)COCC(C)OC(C)COCC(C)OCC(O)COCC(C)OCC(C)OC(C)COCC(C)OC(C)CO	0.6
383	66735-04-4	CC(Cc1ccc(cc1)C(C)(C)C)C(O)=O	0.35
384	127-20-8	CC(Cl)(Cl)C(O)=O	0.85
385	71-55-6	CC(Cl)(Cl)Cl	0.48
386	78-87-5	CC(Cl)CCl	0.57
387	98-84-0	CC(N)c1ccccc1	0.73
388	122-20-3	CC(O)CN(CC(C)O)CC(C)O	-0.73
389	24800-44-0	CC(O)COC(C)COC(C)CO	0.23
390	110-98-5	CC(O)COCC(C)O	0.49
391	6165-51-1	CC(c1ccccc1)c1cc(C)ccc1C	2.92
392	25640-71-5	CC(c1ccccc1)c1ccc(O)c(C(C)c2ccccc2)c1C(C)c1ccccc1	2.42
393	59080-37-4	Brc1ccc(Br)c(c1)-c1cc(Br)ccc1Br	4.97
394	40766-31-2	CC(c1ccccc1)c1cccc(C)c1C	3.44
395	52918-63-5	CC1(C)C(C=C(Br)Br)C1C(=O)OC(C#N)c1cccc(Oc2ccccc2)c1	2.35
396	52315-07-8	CC1(C)C(C=C(Cl)Cl)C1C(=O)OC(C#N)c1cccc(Oc2ccccc2)c1	2.61
397	61949-76-6	CC1(C)C(C=C(Cl)Cl)C1C(=O)OCc1cccc(Oc2ccccc2)c1	2.7
398	473-54-1	CC1(C)C2CC1C(C)(O)CC2	0.83
399	79-92-5	CC1(C)C2CCC(C2)C1=C	2.97
400	15087-24-8	CC1(C)C2CCC1(C)C(=O)C2=Cc1ccccc1	2.5
401	2371-42-8	CC1(C)C2CCC1(C)C(C)(O)C2	1.48
402	2855-13-2	CC1(C)CC(N)CC(C)(CN)C1	0
403	106-37-6	Brc1ccc(Br)cc1	2.34
404	2403-88-5	CC1(C)CC(O)CC(C)(C)N1	0.26
405	5835-26-7	CC1(CCC2C(C1)=CCC1C2(C)CCCC1(C)C(O)=O)C=C	1.54
406	127-27-5	CC1(CCC2C(CCC3C2(C)CCCC3(C)C(O)=O)=C1)C=C	1.8
407	78-59-1	CC1=CC(=O)CC(C)(C)C1	0.34
408	26780-96-1	CC1=CC(C)(C)Nc2ccccc12	3.06
409	50853-70-8	CC1=CC2CC1C(C2C(O)=O)C(O)=O	0.74
410	92-86-4	Brc1ccc(cc1)-c1ccc(Br)cc1	3.99
411	3407-42-9	CC1C2CC(CC2C2CCCC(O)C2)C1(C)C	2.76
412	6731-36-8	CC1CC(C)(C)CC(C1)(OOC(C)(C)C)OOC(C)(C)C	3.98
413	66-81-9	CC1CC(C)C(=O)C(C1)C(O)CC1CC(=O)NC(=O)C1	0.45
414	6864-37-5	CC1CC(CC2CCC(N)C(C)C2)CCC1N	1.28
415	108-36-1	Brc1cccc(Br)c1	2.8
416	57567-84-7	CC1CCC(C(C1)C(O)=O)C(O)=O	0.38
417	32388-55-9	CC1CCC2C(C)(C)C3CC12CC(C(C)=O)=C3C	2.9
418	504-03-0	CC1CCCC(C)N1	0.2
419	108-87-2	CC1CCCCC1	2.3
420	123-63-7	CC1OC(C)OC(C)O1	0.04
421	16219-75-3	CC=C1CC2CC1C=C2	2.13
422	1424148-99-1	CC=CC=CC=CC=CC1CC(=O)N(CCCCCC(O)=O)C1=O	1.71
423	6842-15-5	CC=CCC=CCC=CCC=C	3.44
424	61968-52-3	CCC(=O)Nc1cc(ccc1N=Nc1ccc(cc1Cl)[N+]([O-])=O)N(CCOC(C)=O)CCOC(C)=O	0.73
425	25973-55-1	CCC(C)(C)c1cc(c(O)c(c1)C(C)(C)CC)-n1nc2ccccc2n1	3.2
426	120-95-6	CCC(C)(C)c1ccc(O)c(c1)C(C)(C)CC	2.63
427	2049-95-8	CCC(C)(C)c1ccccc1	3.18
428	96-29-7	CCC(C)=NO	0.62
429	108-86-1	Brc1ccccc1	1.43
430	626-23-3	CCC(C)NC(C)CC	0.48
431	154279-60-4	CCC(C)NC1CCC(CC2CCC(CC2)NC(C)CC)CC1	0.93
432	36437-37-3	CCC(C)c1cc(cc(c1O)-n1nc2ccccc2n1)C(C)(C)C	4.08
433	88-85-7	CCC(C)c1cc(cc(c1O)[N+]([O-])=O)[N+]([O-])=O	0.36
434	99-71-8	CCC(C)c1ccc(O)cc1	1.35
435	UNK-01	CCC(C)c1ccc(OCC(O)CO)cc1	0.81
436	5510-99-6	CCC(C)c1cccc(C(C)CC)c1O	2.54
437	89-72-5	CCC(C)c1ccccc1O	1.49
438	3766-81-2	CCC(C)c1ccccc1OC(=O)NC	0.6
439	314-40-9	CCC(C)n1c(=O)[nH]c(C)c(Br)c1=O	0.51
440	77-99-6	CCC(CO)(CO)CO	0.81
441	346-10-1	CCC(Oc1ccc(cc1C(C)(C)CC)C(C)(C)CC)C(=O)Nc1ccc(NC(=O)C(F)(F)C(F)(F)C(F)(F)F)c(O)c1	0.29
442	50-06-6	CCC1(C(=O)NC(=O)NC1=O)c1ccccc1	0.7
443	61790-13-4	CCC1CCC(CCC(O)=O)C1	0.88
444	1678-91-7	CCC1CCCCC1	3.42
445	13987-01-4	CCCC(C)CC(C)C	3.32
446	30171-80-3	BrC(Br)c1ccccc1OCC1CO1	0.61
447	6425-39-4	C(CN1CCOCC1)OCCN1CCOCC1	0.48
448	7299-99-2	CCCCC(CC)C(=O)OCC(COC(=O)C(CC)CCCC)(COC(=O)C(CC)CCCC)COC(=O)C(CC)CCCC	0.92
449	2057-49-0	C(Cc1ccccc1)Cc1ccncc1	1.83
450	13358-11-7	CCCCC(CC)CN1C(=O)C2C(C1=O)C1(CCC2(C)C=C1)C(C)C	3.15
451	577-11-7	CCCCC(CC)COC(=O)CC(C(=O)OCC(CC)CCCC)S(O)(=O)=O	0.49
452	3319-31-1	CCCCC(CC)COC(=O)c1ccc(C(=O)OCC(CC)CCCC)c(c1)C(=O)OCC(CC)CCCC	0.27
453	117-81-7	CCCCC(CC)COC(=O)c1ccccc1C(=O)OCC(CC)CCCC	2.34
454	103-44-6	CCCCC(CC)COC=C	2.98
455	78-42-2	CCCCC(CC)COP(=O)(OCC(CC)CCCC)OCC(CC)CCCC	1.04
456	103-50-4	C(OCc1ccccc1)c1ccccc1	2.5
457	1241-94-7	CCCCC(CC)COP(=O)(Oc1ccccc1)Oc1ccccc1	2.67
458	14802-03-0	CCCCC(CC)COP(O)(=O)CC(CC)CCCC	0.9
459	298-07-7	CCCCC(CC)COP(O)(=O)OCC(CC)CCCC	0.62
460	124-11-8	CCCCCCCC=C	3.18
461	112-40-3	CCCCCCCCCCCC	2.38
462	3772-94-9	CCCCCCCCCCCC(=O)Oc1c(Cl)c(Cl)c(Cl)c(Cl)c1Cl	2.33
463	629-25-4	CCCCCCCCCCCC(O)=O	2.4
464	629-62-9	CCCCCCCCCCCCCCC	1.31
465	544-76-3	CCCCCCCCCCCCCCCC	1.64
466	101-81-5	C(c1ccccc1)c1ccccc1	2.97
467	28299-29-8	CCCCCCCCCCCCCCCCC=CC(CC(O)=O)C(O)=O	0.22
468	504-53-0	CCCCCCCCCCCCCCCCCC(=O)CCCCCCCCCCCCCCCCC	1.22
469	110-30-5	CCCCCCCCCCCCCCCCCC(=O)NCCNC(=O)CCCCCCCCCCCCCCCCC	0.54
470	26787-65-5	CCCCCCCCCCCCCCCCCCCCCCCCCCCC(=O)OCCO	1.2
471	18375-66-1	CCCCCCCCCCCCCCCCCCNC(=O)C(O)C(O)C(O)C(O)CO	2.94
472	3891-29-0	CCCCCCCCCCCCCCCCCCNC(=O)N1CC1	1.46
473	4051-66-5	CCCCCCCCCCCCCCCCCCNC(=O)NCCCCCCCCCCCCCCCCCC	1.48
474	2082-79-3	CCCCCCCCCCCCCCCCCCOC(=O)CCc1cc(c(O)c(c1)C(C)(C)C)C(C)(C)C	1
475	2885-00-9	CCCCCCCCCCCCCCCCCCS	-0.04
476	208-96-8	C1=Cc2cccc3cccc1c23	2.57
477	57-09-0	CCCCCCCCCCCCCCCC[N+](C)(C)C	2.85
478	119-06-2	CCCCCCCCCCCCCOC(=O)c1ccccc1C(=O)OCCCCCCCCCCCCC	1.17
479	60628-17-3	CCCCCCCCCCCCCOP(Oc1ccccc1)Oc1ccccc1	1.54
480	29598-76-3	CCCCCCCCCCCCSCCC(=O)OCC(COC(=O)CCSCCCCCCCCCCCC)(COC(=O)CCSCCCCCCCCCCCC)COC(=O)CCSCCCCCCCCCCCC	1.38
481	UNK-13	CCCCCCCCCCCCSP(=O)(SCCCCCCCCCCCC)SCCCCCCCCCCCC	0.09
482	281-23-2	C1C2CC3CC1CC(C2)C3	3.42
483	28519-02-0	CCCCCCCCCCCCc1c(Oc2ccccc2S(O)(=O)=O)cccc1S(O)(=O)=O	0.84
484	104-43-8	CCCCCCCCCCCCc1ccc(O)cc1	3.22
485	63428-00-2	CCCCCCCCCCCCc1ccc(Oc2cc(ccc2S(O)(=O)=O)S(O)(=O)=O)cc1	1.1
486	25155-30-0	CCCCCCCCCCCCc1ccc(cc1)S(O)(=O)=O	1.44
487	27193-86-8	CCCCCCCCCCCCc1cccc(O)c1	2.87
488	10496-18-1	CCCCCCCCCCSSCCCCCCCCCC	1.15
489	7173-51-5	CCCCCCCCCC[N+](C)(C)CCCCCCCCCC	2.12
490	104-40-5	CCCCCCCCCc1ccc(O)cc1	2.55
491	1323-65-5	CCCCCCCCCc1cccc(O)c1CCCCCCCCC	2.29
492	77-73-6	C1C=CC2C3CC(C=C3)C12	2.34
493	25154-52-3	CCCCCCCCCc1ccccc1O	1.16
494	1116-76-3	CCCCCCCCN(CCCCCCCC)CCCCCCCC	1.93
495	1843-05-6	CCCCCCCCOc1ccc(C(=O)c2ccccc2)c(O)c1	2.01
496	110553-27-0	CCCCCCCCSCc1cc(C)c(O)c(CSCCCCCCCC)c1	1.7
497	2943-75-1	CCCCCCCC[Si](OCC)(OCC)OCC	3.24
498	101-67-7	CCCCCCCCc1ccc(Nc2ccc(CCCCCCCC)cc2)cc1	0.58
499	1806-26-4	CCCCCCCCc1ccc(O)cc1	2.16
500	26603-23-6	CCCCCCCCc1ccccc1Nc1ccccc1CCCCCCCC	1
501	3648-21-3	CCCCCCCOC(=O)c1ccccc1C(=O)OCCCCCCC	0.88
502	3048-65-5	C1C=CC2CC=CCC12	2.49
503	60782-58-3	CCCCCC[Si](O)(CCCCCC)CCCCCC	1.59
504	41122-70-7	CCCCCCc1ccc(cc1)-c1ccc(cc1)C#N	3.59
505	13936-21-5	CCCCCc1ccc2C(=O)c3ccccc3C(=O)c2c1	2.98
506	109-69-3	CCCCCl	1.22
507	102-82-9	CCCCN(CCCC)CCCC	1.33
508	102-81-8	CCCCN(CCO)CCCC	1.14
509	3622-84-2	CCCCNS(=O)(=O)c1ccccc1	0.54
510	84-74-2	CCCCOC(=O)c1ccccc1C(=O)OCCCC	2.23
511	85-68-7	CCCCOC(=O)c1ccccc1C(=O)OCc1ccccc1	1.31
512	142-96-1	CCCCOCCCC	1.89
513	61968-28-3	CCCCOCCN1C(O)c2c(C1=N)c(N)c1C(=O)c3ccccc3C(=O)c1c2N	0.62
514	61788-32-7	C1CC=CC(C1)c1ccc(cc1)C1CCC=CC1	4.17
515	78-51-3	CCCCOCCOP(=O)(OCCOCCCC)OCCOCCCC	0.68
516	126-73-8	CCCCOP(=O)(OCCCC)OCCCC	1.27
517	107-66-4	CCCCOP(O)(=O)OCCCC	0.59
518	20367-35-5	CCCCOc1ccccc1OCCCC	2.92
519	1052075-57-6	CCCC[Si](C)(C)O[Si](C)(C)O[Si](C)(C)O[Si](C)(C)O[Si](C)(C)CCCOCCOC(=O)C(C)=C	2.5
520	UNK-10	CCCC[Sn++]CCCC	1.82
521	818-08-6	CCCC[Sn](=O)CCCC	1.55
522	1461-25-2	CCCC[Sn](CCCC)(CCCC)CCCC	2.34
523	56-35-9	CCCC[Sn](CCCC)(CCCC)O[Sn](CCCC)(CCCC)CCCC	4.05
524	4979-32-2	C1CCC(CC1)N(Sc1nc2ccccc2s1)C1CCCCC1	2.5
525	3644-38-0	CCCC[Sn](CCCC)(CCCC)Oc1c(Cl)c(Cl)c(Cl)c(Cl)c1Cl	3.55
526	1067-97-6	CCCC[Sn](O)(CCCC)CCCC	3.92
527	20651-71-2	CCCCc1ccc(cc1)C(O)=O	0.88
528	25638-17-9	CCCCc1ccc2ccccc2c1S(O)(=O)=O	-0.36
529	1582-09-8	CCCN(CCC)c1c(cc(cc1[N+]([O-])=O)C(F)(F)F)[N+]([O-])=O	3.51
530	538-75-0	C1CCC(CC1)N=C=NC1CCCCC1	0.09
531	1941-30-6	CCC[N+](CCC)(CCC)CCC	-0.04
532	51-52-5	CCCc1cc(=O)[nH]c(=S)[nH]1	1.09
533	28249-77-6	CCN(CC)C(=O)SCc1ccc(Cl)cc1	2.27
534	134-62-3	CCN(CC)C(=O)c1cccc(C)c1	0.38
535	121-44-8	CCN(CC)CC	0.2
536	493-01-6	C1CCC2CCCCC2C1	3.3
537	100-37-8	CCN(CC)CCO	0.29
538	3520-42-1	CCN(CC)c1cc2[o+]c3cc(N(CC)CC)c(C)cc3c(-c3ccc(cc3S(O)(=O)=O)S(O)(=O)=O)c2cc1C	0.24
539	5809-23-4	CCN(CC)c1ccc(C(=O)c2ccccc2C(O)=O)c(O)c1	0.2
540	81-88-9	CCN(CC)c1ccc2c(-c3ccccc3C(O)=O)c3ccc(cc3[o+]c2c1)N(CC)CC	-0.24
541	509-34-2	CCN(CC)c1ccc2c(Oc3cc(ccc3C22OC(=O)c3ccccc23)N(CC)CC)c1	0.46
542	91-66-7	CCN(CC)c1ccccc1	2.01
543	139-87-7	CCN(CCO)CCO	0.54
544	1694-09-3	CCN(Cc1cccc(c1)S(O)(=O)=O)c1ccc(cc1)[C+](c1ccc(cc1)N(C)C)c1ccc(cc1)N(CC)Cc1cccc(c1)S(O)(=O)=O	0.57
545	2650-18-2	CCN(Cc1cccc(c1)S(O)(=O)=O)c1ccc(cc1)[C+](c1ccc(cc1)N(CC)Cc1cccc(c1)S(O)(=O)=O)c1ccccc1S(O)(=O)=O	0.28
546	1892-57-5	CCN=C=NCCCN(C)C	0.18
547	110-83-8	C1CCC=CC1	1.62
548	622-57-1	CCNc1ccc(C)cc1	0.38
549	118-44-5	CCNc1cccc2ccccc12	2.32
550	103-69-5	CCNc1ccccc1	1.01
551	1912-24-9	CCNc1nc(Cl)nc(NC(C)C)n1	0.9
552	122-34-9	CCNc1nc(Cl)nc(NCC)n1	1.11
553	834-12-8	CCNc1nc(NC(C)C)nc(SC)n1	1.04
554	110-82-7	C1CCCCC1	1.94
555	77501-63-4	CCOC(=O)C(C)OC(=O)c1cc(Oc2ccc(cc2Cl)C(F)(F)F)ccc1[N+]([O-])=O	2.48
556	510-15-6	CCOC(=O)C(O)(c1ccc(Cl)cc1)c1ccc(Cl)cc1	2.71
557	61391-87-5	CCOC(=O)C(SP(=S)(OC)OC)c1ccccc1	1.56
558	1634-78-2	CCOC(=O)CC(SP(=O)(OC)OC)C(=O)OCC	-0.4
559	121-75-5	CCOC(=O)CC(SP(=S)(OC)OC)C(=O)OCC	1.04
560	51-79-6	CCOC(N)=O	0.36
561	60-29-7	CCOCC	0.6
562	294-62-2	C1CCCCCCCCCCC1	3.98
563	78-40-0	CCOP(=O)(OCC)OCC	0
564	962-58-3	CCOP(=O)(OCC)Oc1cc(C)nc(n1)C(C)C	-1
565	13286-32-3	CCOP(=O)(OCC)SCc1ccccc1	1.24
566	2012-00-2	CCOP(=O)(Oc1ccc(cc1)[N+]([O-])=O)c1ccccc1	0.69
567	17109-49-8	CCOP(=O)(Sc1ccccc1)Sc1ccccc1	1.45
568	25311-71-1	CCOP(=S)(NC(C)C)Oc1ccccc1C(=O)OC(C)C	2
569	36335-67-8	CCOP(=S)(NC(C)CC)Oc1cc(C)ccc1[N+]([O-])=O	2.42
570	14816-18-3	CCOP(=S)(OCC)ON=C(C#N)c1ccccc1	2.96
571	333-41-5	CCOP(=S)(OCC)Oc1cc(C)nc(n1)C(C)C	1.76
572	18854-01-8	CCOP(=S)(OCC)Oc1cc(on1)-c1ccccc1	2.63
573	119-12-0	CCOP(=S)(OCC)Oc1ccc(=O)n(n1)-c1ccccc1	0.72
574	56-38-2	CCOP(=S)(OCC)Oc1ccc(cc1)[N+]([O-])=O	1.99
575	2921-88-2	CCOP(=S)(OCC)Oc1nc(Cl)c(Cl)cc1Cl	2.82
576	218178	CCOP(=S)(OCC)SCCS(=O)(=O)CC	0.68
577	218210	CCOP(=S)(OCC)SCCS(=O)CC	0
578	298-04-4	CCOP(=S)(OCC)SCCSCC	2.22
579	13071-79-9	CCOP(=S)(OCC)SCSC(C)(C)C	2.42
580	119-64-2	C1CCc2ccccc2C1	2.5
581	3792-59-4	CCOP(=S)(Oc1ccc(Cl)cc1Cl)c1ccccc1	4.16
582	2104-64-5	CCOP(=S)(Oc1ccc(cc1)[N+]([O-])=O)c1ccccc1	2.96
583	298-06-6	CCOP(S)(=S)OCC	0.2
584	919-30-2	CCO[Si](CCCN)(OCC)OCC	0.22
585	156-43-4	CCOc1ccc(N)cc1	0.52
586	62-44-2	CCOc1ccc(NC(C)=O)cc1	1.48
587	91-53-2	CCOc1ccc2NC(C)(C)C=C(C)c2c1	1.84
588	280-57-9	C1CN2CCN1CC2	0.85
589	2212-67-1	CCSC(=O)N1CCCCCC1	1.41
590	110-81-6	CCSSCC	1.69
591	85-22-3	CCc1c(Br)c(Br)c(Br)c(Br)c1Br	2.52
592	4130-42-1	CCc1cc(c(O)c(c1)C(C)(C)C)C(C)(C)C	3.51
593	3674-75-7	CCc1cc2ccccc2c2ccccc12	2.67
594	105-05-5	CCc1ccc(CC)cc1	2.71
595	28575-17-9	CCc1ccc(cc1)-c1ccc(CC)cc1	3.76
596	5707-44-8	CCc1ccc(cc1)-c1ccccc1	2.95
597	3194-55-6	BrC1CCC(Br)C(Br)CCC(Br)C(Br)CCC1Br	3.64
598	6674-22-2	C1CN=C2CCCCCN2C1	0.08
599	84-51-5	CCc1ccc2C(=O)c3ccccc3C(=O)c2c1	1.61
600	141-93-5	CCc1cccc(CC)c1	2.77
601	15972-60-8	CCc1cccc(CC)c1N(COC)C(=O)CCl	1.12
602	28106-30-1	CCc1ccccc1C=C	2.69
603	612-22-6	CCc1ccccc1[N+]([O-])=O	1.11
604	119168-77-3	CCc1nn(C)c(C(=O)NCc2ccc(cc2)C(C)(C)C)c1Cl	1.14
605	110-85-0	C1CNCCN1	0.21
606	579-10-2	CN(C(C)=O)c1ccccc1	-0.05
607	330-54-1	CN(C)C(=O)Nc1ccc(Cl)c(Cl)c1	0.74
608	137-26-8	CN(C)C(=S)SSC(=S)N(C)C	0.53
609	1631-58-9	CN(C)C1CSSC1	1.72
610	68-12-2	CN(C)C=O	-0.11
611	108-00-9	CN(C)CCN	0.25
612	103-83-3	CN(C)Cc1ccccc1	0.96
613	110-91-8	C1COCCN1	0.02
614	680-31-9	CN(C)P(=O)(N(C)C)N(C)C	-0.3
615	UNK-11	CN(C)S(=O)(=O)Nc1ccccc1	0.51
616	101-61-1	CN(C)c1ccc(Cc2ccc(cc2)N(C)C)cc1	2.74
617	2465-27-2	CN(C)c1ccc(cc1)C(=N)c1ccc(cc1)N(C)C	1.04
618	90-94-8	CN(C)c1ccc(cc1)C(=O)c1ccc(cc1)N(C)C	1.56
619	1552-42-7	CN(C)c1ccc(cc1)C1(OC(=O)c2cc(ccc12)N(C)C)c1ccc(cc1)N(C)C	3.16
620	569-64-2	CN(C)c1ccc(cc1)[C+](c1ccccc1)c1ccc(cc1)N(C)C	1.84
621	99-64-9	CN(C)c1cccc(c1)C(O)=O	1.1
622	121-69-7	CN(C)c1ccccc1	0.99
623	123-91-1	C1COCCO1	-0.28
624	55250-84-5	CN(C1CCCCC1)c1ccc2c(Oc3cc(C)c(Nc4ccccc4)cc3C22OC(=O)c3ccccc23)c1	3.47
625	626-67-5	CN1CCCCC1	0.5
626	109-02-4	CN1CCOCC1	1
627	60-51-5	CNC(=O)CSP(=S)(OC)OC	0.2
628	2655-14-3	CNC(=O)Oc1cc(C)cc(C)c1	0.29
629	63-25-2	CNC(=O)Oc1cccc2ccccc12	1.09
630	85-00-7	C1C[n+]2ccccc2-c2cccc[n+]12	0.46
631	2631-40-5	CNC(=O)Oc1ccccc1C(C)C	0.68
632	10541-83-0	CNc1ccc(cc1)C(O)=O	0.06
633	696-44-6	CNc1cccc(C)c1	0.86
634	100-61-8	CNc1ccccc1	0.66
635	611-21-2	CNc1ccccc1C	0.86
636	57055-39-7	COC(=O)C1(Cl)C(Cl)CCC2(C)C1CCc1cc(ccc21)C(C)C	1.97
637	10605-21-7	COC(=O)Nc1nc2ccccc2[nH]1	0.19
638	3965-55-7	COC(=O)c1cc(cc(c1)S(O)(=O)=O)C(=O)OC	-0.02
639	4904-61-4	C1CC=CCCC=CCCC=C1	3.92
640	840-65-3	COC(=O)c1ccc2cc(ccc2c1)C(=O)OC	1.58
641	606-28-0	COC(=O)c1ccccc1C(=O)c1ccccc1	0.89
642	1634-04-4	COC(C)(C)C	0.18
643	5332-73-0	COCCCN	0.02
644	3089-11-0	COCN(COC)c1nc(nc(n1)N(COC)COC)N(COC)COC	0.28
645	83-32-9	C1Cc2cccc3cccc1c23	2.88
646	330-55-2	CON(C)C(=O)Nc1ccc(Cl)c(Cl)c1	1.26
647	1746-81-2	CON(C)C(=O)Nc1ccc(Cl)cc1	1.28
648	512-56-1	COP(=O)(OC)OC	-0.26
649	961-11-5	COP(=O)(OC)OC(=CCl)c1cc(Cl)c(Cl)cc1Cl	1.65
650	62-73-7	COP(=O)(OC)OC=C(Cl)Cl	-0.2
651	2255-17-6	COP(=O)(OC)Oc1ccc(c(C)c1)[N+]([O-])=O	0.24
652	86-73-7	C1c2ccccc2-c2ccccc12	2.8
653	57018-04-9	COP(=S)(OC)Oc1c(Cl)cc(C)cc1Cl	2.5
654	114012-04-3	COP(=S)(OC)Oc1c(Cl)cccc1C#N	2.33
655	2104-96-3	COP(=S)(OC)Oc1cc(Cl)c(Br)cc1Cl	3.59
656	299-84-3	COP(=S)(OC)Oc1cc(Cl)c(Cl)cc1Cl	3.58
657	18181-70-9	COP(=S)(OC)Oc1cc(Cl)c(I)cc1Cl	3.62
658	55-38-9	COP(=S)(OC)Oc1ccc(SC)c(C)c1	2.24
659	3761-42-0	COP(=S)(OC)Oc1ccc(c(C)c1)S(C)(=O)=O	0.51
660	3761-41-9	COP(=S)(OC)Oc1ccc(c(C)c1)S(C)=O	0.12
661	122-14-5	COP(=S)(OC)Oc1ccc(c(C)c1)[N+]([O-])=O	1.71
662	500-28-7	COP(=S)(OC)Oc1ccc(c(Cl)c1)[N+]([O-])=O	1.55
663	2636-26-2	COP(=S)(OC)Oc1ccc(cc1)C#N	1.56
664	298-00-0	COP(=S)(OC)Oc1ccc(cc1)[N+]([O-])=O	1.93
665	2463-84-5	COP(=S)(OC)Oc1ccc(cc1Cl)[N+]([O-])=O	1.89
666	732-11-6	COP(=S)(OC)SCN1C(=O)c2ccccc2C1=O	0.24
667	3811-49-2	COP1(=S)OCc2ccccc2O1	1.31
668	2530-85-0	CO[Si](CCCOC(=O)C(C)=C)(OC)OC	1.03
669	1825-21-4	COc1c(Cl)c(Cl)c(Cl)c(Cl)c1Cl	4.16
670	87-40-1	COc1c(Cl)cc(Cl)cc1Cl	2.84
671	50375-10-5	COc1c(Cl)ccc(Cl)c1Cl	2.53
672	2539-17-5	COc1c(O)c(Cl)c(Cl)c(Cl)c1Cl	2.92
673	938-86-3	COc1cc(Cl)c(Cl)c(Cl)c1Cl	3.35
674	3194-57-8	BrC1CCC(Br)C(Br)CCC1Br	3.66
675	100-40-3	C=CC1CCC=CC1	2.24
676	2668-24-8	COc1cc(Cl)c(Cl)c(Cl)c1O	2.13
677	6130-75-2	COc1cc(Cl)c(Cl)cc1Cl	2.78
678	2460-49-3	COc1cc(Cl)c(Cl)cc1O	2.03
679	32861-85-1	COc1cc(Oc2ccc(Cl)cc2Cl)ccc1[N+]([O-])=O	3.59
680	131-57-7	COc1ccc(C(=O)c2ccccc2)c(O)c1	1.99
681	120-71-8	COc1ccc(C)cc1N	0.74
682	102-70-5	C=CCN(CC=C)CC=C	0.53
683	54135-80-7	COc1ccc(Cl)c(Cl)c1Cl	3.19
684	96-96-8	COc1ccc(N)c(c1)[N+]([O-])=O	0.82
685	101-70-2	COc1ccc(Nc2ccc(OC)cc2)cc1	1.88
686	25013-16-5	COc1ccc(O)c(c1)C(C)(C)C	1.29
687	72-43-5	COc1ccc(cc1)C(c1ccc(OC)cc1)C(Cl)(Cl)Cl	2.8
688	100-17-4	COc1ccc(cc1)[N+]([O-])=O	1.08
689	555-03-3	COc1cccc(c1)[N+]([O-])=O	0.76
690	2216-69-5	COc1cccc2ccccc12	2.3
691	1623-19-4	C=CCOP(=O)(OCC=C)OCC=C	0.02
692	91-23-6	COc1ccccc1[N+]([O-])=O	0.6
693	950-37-8	COc1nn(CSP(=S)(OC)OC)c(=O)s1	0.66
694	67-68-5	CS(C)=O	0.35
695	1073-72-9	CSc1ccc(O)cc1	0.9
696	56-93-9	C[N+](C)(C)Cc1ccccc1	-0.26
697	7529-22-8	C[N+]1([O-])CCOCC1	1
698	107-51-7	C[Si](C)(C)O[Si](C)(C)O[Si](C)(C)C	3.73
699	141-62-8	C[Si](C)(C)O[Si](C)(C)O[Si](C)(C)O[Si](C)(C)C	3.44
700	17928-28-8	C[Si](C)(C)O[Si](C)(O[Si](C)(C)C)O[Si](C)(C)C	3.54
701	556-67-2	C[Si]1(C)O[Si](C)(C)O[Si](C)(C)O[Si](C)(C)O1	4.08
702	1910-42-5	C[n+]1ccc(cc1)-c1cc[n+](C)cc1	0.28
703	3520-72-7	Cc1[nH]n(-c2ccccc2)c(=O)c1N=Nc1ccc(cc1Cl)-c1ccc(N=Nc2c(C)[nH]n(-c3ccccc3)c2=O)c(Cl)c1	0.48
704	87-83-2	Cc1c(Br)c(Br)c(Br)c(Br)c1Br	2.38
705	1709-70-2	Cc1c(Cc2cc(c(O)c(c2)C(C)(C)C)C(C)(C)C)c(C)c(Cc2cc(c(O)c(c2)C(C)(C)C)C(C)(C)C)c(C)c1Cc1cc(c(O)c(c1)C(C)(C)C)C(C)(C)C	0.46
706	877-10-1	Cc1c(Cl)c(Cl)c(C)c(Cl)c1Cl	3.61
707	877-11-2	Cc1c(Cl)c(Cl)c(Cl)c(Cl)c1Cl	3.83
708	118-69-4	Cc1c(Cl)cccc1Cl	2.84
709	81-15-2	Cc1c(c(C)c(c(c1[N+]([O-])=O)C(C)(C)C)[N+]([O-])=O)[N+]([O-])=O	3.61
710	100-42-5	C=Cc1ccccc1	1.13
711	118-96-7	Cc1c(cc(cc1[N+]([O-])=O)[N+]([O-])=O)[N+]([O-])=O	0.81
712	779-02-2	Cc1c2ccccc2cc2ccccc12	3.19
713	84-57-1	Cc1cc(=O)n([nH]1)-c1cc(Cl)c(cc1Cl)S(O)(=O)=O	1.16
714	527-60-6	Cc1cc(C)c(O)c(C)c1	0.9
715	1879-09-0	Cc1cc(C)c(O)c(c1)C(C)(C)C	2.38
716	575-41-7	Cc1cc(C)c2ccccc2c1	3.56
717	108-67-8	Cc1cc(C)cc(C)c1	2.43
718	25155-23-1	Cc1cc(C)cc(OP(=O)(Oc2cc(C)cc(C)c2)Oc2cc(C)cc(C)c2)c1	2.66
719	1321-74-0	C=Cc1ccccc1C=C	2.54
720	119-47-1	Cc1cc(Cc2cc(C)cc(c2O)C(C)(C)C)c(O)c(c1)C(C)(C)C	2.36
721	6639-30-1	Cc1cc(Cl)c(Cl)cc1Cl	3.87
722	53906-68-6	Cc1cc(Cl)ccc1N	1.21
723	1570-64-5	Cc1cc(Cl)ccc1O	1.18
724	94-74-6	Cc1cc(Cl)ccc1OCC(O)=O	0.11
725	3214-47-9	Cc1cc(NC(=O)Nc2ccc(N=Nc3cc(c4cccc(c4c3)S(O)(=O)=O)S(O)(=O)=O)c(C)c2)ccc1N=Nc1cc(c2cccc(c2c1)S(O)(=O)=O)S(O)(=O)=O	0.2
726	1190723	Cc1cc(NN=C2C(=O)C=Cc3ccccc23)c(cc1Cl)S(O)(=O)=O	1.07
727	100-43-6	C=Cc1ccncc1	1.91
728	96-69-5	Cc1cc(O)c(cc1Sc1cc(c(O)cc1C)C(C)(C)C)C(C)(C)C	0.79
729	59-50-7	Cc1cc(O)ccc1Cl	0.98
730	2581-34-2	Cc1cc(O)ccc1[N+]([O-])=O	1.23
731	729335	Cc1cc(c(O)c(c1)C(C)(C)C)-n1nc2ccc(Cl)cc2n1	2.9
732	128-37-0	Cc1cc(c(O)c(c1)C(C)(C)C)C(C)(C)C	3.16
733	15782-05-5	Cc1cc(c(cc1Cl)N=Nc1c(O)c(cc2ccccc12)C(O)=O)S(O)(=O)=O	0.3
734	85954-11-6	Cc1cc(cc(C)c1OCC1CO1)-c1cc(C)c(OCC2CO2)c(C)c1	0.92
735	534-52-1	Cc1cc(cc(c1O)[N+]([O-])=O)[N+]([O-])=O	0.16
736	119-93-7	Cc1cc(ccc1N)-c1ccc(N)c(C)c1	1.63
737	37372-50-2	Cc1cc(ccc1N=Nc1ccc(N)cc1N)-c1ccc(N=Nc2c(N)c3c(O)c(N=Nc4ccccc4)c(cc3cc2S(O)(=O)=O)S(O)(=O)=O)c(C)c1	1.53
738	85-83-6	Cc1cc(ccc1NN=C1C(=O)C=Cc2ccccc12)N=Nc1ccccc1C	0.75
739	50925-42-3	Cc1cc(ccc1Nc1nc(NCCO)nc(Nc2ccc(cc2C)N=Nc2cc(c3cccc(c3c2)S(O)(=O)=O)S(O)(=O)=O)n1)N=Nc1cc(c2cccc(c2c1)S(O)(=O)=O)S(O)(=O)=O	0.5
740	883-20-5	Cc1cc2ccccc2c2ccccc12	2.56
741	95-63-6	Cc1ccc(C)c(C)c1	2.19
742	13540-50-6	Cc1ccc(C)c(Cc2ccccc2)c1	3.29
743	95-78-3	Cc1ccc(C)c(N)c1	0.55
744	106-42-3	Cc1ccc(C)cc1	1.17
745	622-97-9	Cc1ccc(C=C)cc1	1.5
746	615-74-7	Cc1ccc(Cl)c(O)c1	0.56
747	106-43-4	Cc1ccc(Cl)cc1	1.77
748	95-73-8	Cc1ccc(Cl)cc1Cl	2.95
749	95-68-1	Cc1ccc(N)c(C)c1	0.82
750	88-44-8	Cc1ccc(N)c(c1)S(O)(=O)=O	0.6
751	106-49-0	Cc1ccc(N)cc1	0.61
752	103-64-0	BrC=Cc1ccccc1	2.26
753	78-79-5	CC(=C)C=C	1.12
754	95-64-7	Cc1ccc(N)cc1C	0.65
755	95-80-7	Cc1ccc(N)cc1N	1.7
756	1235134	Cc1ccc(N=Nc2c(O)c(cc3ccccc23)C(O)=O)c(c1)S(O)(=O)=O	0.84
757	2425-85-6	Cc1ccc(NN=C2C(=O)C=Cc3ccccc23)c(c1)[N+]([O-])=O	0.44
758	105-67-9	Cc1ccc(O)c(C)c1	2.18
759	2440-22-4	Cc1ccc(O)c(c1)-n1nc2ccccc2n1	2.47
760	2409-55-4	Cc1ccc(O)c(c1)C(C)(C)C	2.08
761	119-33-5	Cc1ccc(O)c(c1)[N+]([O-])=O	0.95
762	2042-14-0	Cc1ccc(O)cc1[N+]([O-])=O	1
763	107-39-1	CC(=C)CC(C)(C)C	2.79
764	827-21-4	Cc1ccc(c(C)c1)S(O)(=O)=O	0.13
765	88-60-8	Cc1ccc(c(O)c1)C(C)(C)C	1.96
766	610-39-9	Cc1ccc(c(c1)[N+]([O-])=O)[N+]([O-])=O	0.43
767	6459-94-5	Cc1ccc(cc1)S(=O)(=O)Oc1ccc(cc1)N=Nc1ccc(cc1C)-c1ccc(NN=C2C(=O)C=Cc3cc(cc(c23)S(O)(=O)=O)S(O)(=O)=O)c(C)c1	1.83
768	99-99-0	Cc1ccc(cc1)[N+]([O-])=O	0.88
769	584-84-9	Cc1ccc(cc1N=C=O)N=C=O	2.45
770	5428-54-6	Cc1ccc(cc1O)[N+]([O-])=O	0.84
771	1712-70-5	CC(=C)c1ccc(Cl)cc1	2.88
772	121-03-9	Cc1ccc(cc1S(O)(=O)=O)[N+]([O-])=O	0.1
773	25321-14-6	Cc1ccc(cc1[N+]([O-])=O)[N+]([O-])=O	0.89
774	91-57-6	Cc1ccc2ccccc2c1	3.46
775	4286-23-1	CC(=C)c1ccc(O)cc1	1.28
776	108-38-3	Cc1cccc(C)c1	1.17
777	526-73-8	Cc1cccc(C)c1C	2.31
778	100-80-1	Cc1cccc(C=C)c1	1.55
779	26898-17-9	Cc1cccc(Cc2ccccc2)c1Cc1ccccc1	4.05
780	108-39-4	Cc1cccc(O)c1	1.23
781	3586-14-9	Cc1cccc(Oc2ccccc2)c1	3.27
782	99-08-1	Cc1cccc(c1)[N+]([O-])=O	0.92
783	2219-82-1	Cc1cccc(c1O)C(C)(C)C	1.92
784	98-83-9	CC(=C)c1ccccc1	1.85
785	90-12-0	Cc1cccc2ccccc12	2.79
786	108-88-3	Cc1ccccc1	1.02
787	95-47-6	Cc1ccccc1C	1.15
788	89-93-0	Cc1ccccc1CN	0.57
789	95-49-8	Cc1ccccc1Cl	1.87
790	95-48-7	Cc1ccccc1O	1.03
791	26444-49-5	Cc1ccccc1OP(=O)(Oc1ccccc1)Oc1ccccc1	2.52
792	1330-78-5	Cc1ccccc1OP(=O)(Oc1ccccc1C)Oc1ccccc1C	2.9
793	28299-41-4	Cc1ccccc1Oc1ccccc1C	2.52
794	6358-85-6	CC(=O)C(=NNc1ccc(cc1Cl)-c1ccc(NN=C(C(C)=O)C(=O)Nc2ccccc2)c(Cl)c1)C(=O)Nc1ccccc1	0.62
795	88-19-7	Cc1ccccc1S(N)(=O)=O	0.21
796	15046-75-0	Cc1ccccc1S(O)(=O)=O	-0.17
797	88-72-2	Cc1ccccc1[N+]([O-])=O	1.33
798	109-06-8	Cc1ccccn1	0.49
799	108-99-6	Cc1cccnc1	0.97
800	616-44-4	Cc1ccsc1	0.64
801	20076-86-2	Cc1sc(=O)c(-c2ccccc2)c(O)c1C(O)=O	1.89
802	127-90-2	ClC(COCC(Cl)C(Cl)(Cl)Cl)C(Cl)(Cl)Cl	3.48
803	67-72-1	ClC(Cl)(Cl)C(Cl)(Cl)Cl	2.66
804	56-23-5	ClC(Cl)(Cl)Cl	1.03
805	5468-75-7	CC(=O)C(=NNc1ccc(cc1Cl)-c1ccc(NN=C(C(C)=O)C(=O)Nc2ccccc2C)c(Cl)c1)C(=O)Nc1ccccc1C	0.24
806	133-06-2	ClC(Cl)(Cl)SN1C(=O)C2CC=CCC2C1=O	2.2
807	75-35-4	ClC(Cl)=C	1.03
808	87-68-3	ClC(Cl)=C(Cl)C(Cl)=C(Cl)Cl	3.83
809	127-18-4	ClC(Cl)=C(Cl)Cl	1.74
810	29082-74-4	ClC(Cl)=C(Cl)c1c(Cl)c(Cl)c(Cl)c(Cl)c1Cl	3.87
811	72-55-9	ClC(Cl)=C(c1ccc(Cl)cc1)c1ccc(Cl)cc1	4.51
812	79-34-5	ClC(Cl)C(Cl)Cl	1.03
813	67-66-3	ClC(Cl)Cl	0.8
814	122-57-6	CC(=O)C=Cc1ccccc1	0.74
815	76-83-5	ClC(c1ccccc1)(c1ccccc1)c1ccccc1	2.62
816	2385-85-5	ClC12C3(Cl)C4(Cl)C5(Cl)C(Cl)(C1(Cl)C4(Cl)Cl)C2(Cl)C(Cl)(Cl)C35Cl	4.31
817	77-47-4	ClC1=C(Cl)C(Cl)(Cl)C(Cl)=C1Cl	1.32
818	60-57-1	ClC1=C(Cl)C2(Cl)C3C4CC(C5OC45)C3C1(Cl)C2(Cl)Cl	3.95
819	309-00-2	ClC1=C(Cl)C2(Cl)C3C4CC(C=C4)C3C1(Cl)C2(Cl)Cl	3.86
820	5566-34-7	ClC1=C(Cl)C2(Cl)C3CC(Cl)(Cl)CC3C1(Cl)C2(Cl)Cl	4.1
821	13560-89-9	ClC1=C(Cl)C2(Cl)C3CCC4C(CCC3C1(Cl)C2(Cl)Cl)C1(Cl)C(Cl)=C(Cl)C4(Cl)C1(Cl)Cl	1.98
822	91-96-3	CC(=O)CC(=O)Nc1ccc(cc1C)-c1ccc(NC(=O)CC(C)=O)c(C)c1	-0.02
823	87-84-3	ClC1C(Br)C(Br)C(Br)C(Br)C1Br	2.49
824	608-73-1	ClC1C(Cl)C(Cl)C(Cl)C(Cl)C1Cl	2.92
825	76-44-8	ClC1C=CC2C1C1(Cl)C(Cl)=C(Cl)C2(Cl)C1(Cl)Cl	3.97
826	5103-74-2	ClC1CC2C(C1Cl)C1(Cl)C(Cl)=C(Cl)C2(Cl)C1(Cl)Cl	4.29
827	542-18-7	ClC1CCCCC1	2.35
828	122-80-5	CC(=O)Nc1ccc(N)cc1	0.36
829	79-01-6	ClC=C(Cl)Cl	1.2
830	74-97-5	ClCBr	0.43
831	96-12-8	ClCC(Br)CBr	1.11
832	13674-87-8	ClCC(CCl)OP(=O)(OC(CCl)CCl)OC(CCl)CCl	1.21
833	13116-53-5	ClCC(Cl)(Cl)CCl	1.6
834	760-23-6	ClCC(Cl)C=C	0.6
835	96-18-4	ClCC(Cl)CCl	1.02
836	79-00-5	ClCC(Cl)Cl	0.67
837	107-05-1	ClCC=C	0.54
838	109-70-6	ClCCCBr	0.72
839	126-72-7	BrCC(Br)COP(=O)(OCC(Br)CBr)OCC(Br)CBr	0.38
840	6034-54-4	CC(=O)Nc1ccc(cc1)S(O)(=O)=O	0.1
841	2162-99-4	ClCCCCCCCCCl	2.72
842	32669-06-0	ClCCOC(c1ccccc1)c1ccccc1	2.65
843	111-44-4	ClCCOCCCl	0.66
844	115-96-8	ClCCOP(=O)(OCCCl)OCCCl	0.12
845	622-24-2	ClCCc1ccccc1	1.86
846	75-09-2	ClCCl	1.36
847	100468-92-6	ClCS(=O)(=O)Nc1ccc(Cl)c(Cl)c1Oc1cccc(Cl)c1Cl	1.89
848	1667-10-3	ClCc1ccc(cc1)-c1ccc(CCl)cc1	1.19
849	1897-45-6	Clc1c(Cl)c(C#N)c(Cl)c(C#N)c1Cl	1.3
850	118-74-1	Clc1c(Cl)c(Cl)c(Cl)c(Cl)c1Cl	4.31
851	2051-24-3	Clc1c(Cl)c(Cl)c(c(Cl)c1Cl)-c1c(Cl)c(Cl)c(Cl)c(Cl)c1Cl	4.24
852	3268-87-9	Clc1c(Cl)c(Cl)c2Oc3c(Cl)c(Cl)c(Cl)c(Cl)c3Oc2c1Cl	2.94
853	30746-58-8	Clc1c(Cl)c(Cl)c2Oc3ccccc3Oc2c1Cl	3.46
854	2234-13-1	Clc1c(Cl)c(Cl)c2c(Cl)c(Cl)c(Cl)c(Cl)c2c1Cl	2.58
855	39001-02-0	Clc1c(Cl)c(Cl)c2c(oc3c(Cl)c(Cl)c(Cl)c(Cl)c23)c1Cl	2.89
856	20020-02-4	Clc1c(Cl)c(Cl)c2ccccc2c1Cl	3.7
857	20749-68-2	Clc1c2C(=O)n3c(nc4cccc5cccc3c45)-c2c(Cl)c(Cl)c1Cl	1.51
858	634-90-2	Clc1cc(Cl)c(Cl)c(Cl)c1	3.24
859	608-93-5	Clc1cc(Cl)c(Cl)c(Cl)c1Cl	3.8
860	68194-17-2	Clc1cc(Cl)c(Cl)c(c1)-c1c(Cl)c(Cl)c(Cl)c(Cl)c1Cl	5.88
861	26630-87-5	CC(=O)OCCN(CCOC(C)=O)c1ccc(N=Nc2nc3ccc(Cl)cc3s2)c(NC(=O)c2ccccc2)c1	1.22
862	2136-99-4	Clc1cc(Cl)c(Cl)c(c1Cl)-c1c(Cl)c(Cl)cc(Cl)c1Cl	5.82
863	95-94-3	Clc1cc(Cl)c(Cl)cc1Cl	3.69
864	52322-80-2	Clc1cc(Cl)c(Oc2ccccc2)cc1Cl	3.64
865	216698-07-6	CC(=O)Oc1ccc(cc1C1C(=O)Oc2ccc(cc12)C(C)(C)CC(C)(C)C)C(C)(C)CC(C)(C)C	1.56
866	40186-71-8	Clc1cc(Cl)c(c(Cl)c1Cl)-c1c(Cl)c(Cl)cc(Cl)c1Cl	5.29
867	52663-69-1	Clc1cc(Cl)c(cc1Cl)-c1c(Cl)cc(Cl)c(Cl)c1Cl	5.84
868	35065-29-3	Clc1cc(Cl)c(cc1Cl)-c1cc(Cl)c(Cl)c(Cl)c1Cl	5.12
869	35065-27-1	Clc1cc(Cl)c(cc1Cl)-c1cc(Cl)c(Cl)cc1Cl	5.43
870	35065-28-2	Clc1cc(Cl)c(cc1Cl)-c1ccc(Cl)c(Cl)c1Cl	5.44
871	15862-07-4	Clc1cc(Cl)c(cc1Cl)-c1ccccc1	3.88
872	33423-92-6	Clc1cc(Cl)c2Oc3cc(Cl)cc(Cl)c3Oc2c1	3.36
873	39227-58-2	Clc1cc(Cl)c2Oc3ccccc3Oc2c1Cl	2.82
874	108-70-3	Clc1cc(Cl)cc(Cl)c1	3.27
875	32598-13-3	Clc1cc(Cl)cc(c1)-c1cc(Cl)cc(Cl)c1	4.62
876	34883-41-5	Clc1cc(Cl)cc(c1)-c1ccccc1	3.75
877	40186-72-9	Clc1cc(c(Cl)c(Cl)c1Cl)-c1c(Cl)c(Cl)c(Cl)c(Cl)c1Cl	5.71
878	35694-08-7	Clc1cc(c(Cl)c(Cl)c1Cl)-c1cc(Cl)c(Cl)c(Cl)c1Cl	5.46
879	520-45-6	CC(=O)c1c(O)cc(C)oc1=O	2.12
880	32774-16-6	Clc1cc(cc(Cl)c1Cl)-c1cc(Cl)c(Cl)c(Cl)c1	5.97
881	35822-46-9	Clc1cc2Oc3c(Cl)c(Cl)c(Cl)c(Cl)c3Oc2c(Cl)c1Cl	3.2
882	39227-28-6	Clc1cc2Oc3c(Cl)c(Cl)c(Cl)c(Cl)c3Oc2cc1Cl	3.77
883	57653-85-7	Clc1cc2Oc3c(Cl)c(Cl)c(Cl)cc3Oc2c(Cl)c1Cl	3.58
884	40321-76-4	Clc1cc2Oc3cc(Cl)c(Cl)c(Cl)c3Oc2cc1Cl	4.38
885	1746-01-6	Clc1cc2Oc3cc(Cl)c(Cl)cc3Oc2cc1Cl	4.57
886	67562-39-4	Clc1cc2c(oc3c(Cl)c(Cl)c(Cl)c(Cl)c23)c(Cl)c1Cl	3.54
887	36065-30-2	CC(Br)(CBr)COc1c(Br)cc(Br)cc1Br	4.3
888	947-72-8	Clc1cc2ccccc2c2ccccc12	3.5
889	57117-31-4	Clc1cc2oc3c(Cl)c(Cl)c(Cl)cc3c2cc1Cl	4.08
890	51207-31-9	Clc1cc2oc3cc(Cl)c(Cl)cc3c2cc1Cl	3.61
891	35554-44-0	Clc1ccc(C(Cn2ccnc2)OCC=C)c(Cl)c1	1.8
892	92296-04-3	CC(Br)C(=O)Nc1c(C)n(C)n(-c2ccccc2)c1=O	-0.2
893	104-88-1	Clc1ccc(C=O)cc1	0.32
894	120-82-1	Clc1ccc(Cl)c(Cl)c1	3.09
895	634-66-2	Clc1ccc(Cl)c(Cl)c1Cl	3.7
896	52712-05-7	Clc1ccc(Cl)c(c1)-c1c(Cl)c(Cl)c(Cl)c(Cl)c1Cl	5.93
897	52663-63-5	Clc1ccc(Cl)c(c1)-c1c(Cl)c(Cl)cc(Cl)c1Cl	5.54
898	26914-33-0	Clc1ccc(Cl)c(c1)-c1c(Cl)cccc1Cl	4.3
899	52712-04-6	Clc1ccc(Cl)c(c1)-c1cc(Cl)c(Cl)c(Cl)c1Cl	5.81
900	37680-73-2	Clc1ccc(Cl)c(c1)-c1cc(Cl)c(Cl)cc1Cl	5.01
901	35693-99-3	Clc1ccc(Cl)c(c1)-c1cc(Cl)ccc1Cl	4.64
902	32598-11-1	Clc1ccc(Cl)c(c1)-c1ccc(Cl)c(Cl)c1	4.93
903	38380-02-8	Clc1ccc(Cl)c(c1)-c1ccc(Cl)c(Cl)c1Cl	5.2
904	41464-39-5	Clc1ccc(Cl)c(c1)-c1cccc(Cl)c1Cl	4.84
905	34883-39-1	Clc1ccc(Cl)c(c1)-c1ccccc1	3.9
906	37680-65-2	Clc1ccc(Cl)c(c1)-c1ccccc1Cl	4.23
907	38411-22-2	Clc1ccc(Cl)c(c1Cl)-c1c(Cl)ccc(Cl)c1Cl	5.43
908	3229-00-3	BrCC(CBr)(CBr)CBr	2.4
909	75-98-9	CC(C)(C)C(O)=O	0.11
910	38411-25-5	Clc1ccc(Cl)c(c1Cl)-c1cc(Cl)c(Cl)c(Cl)c1Cl	5.7
911	1825-31-6	Clc1ccc(Cl)c2ccccc12	3.75
912	106-46-7	Clc1ccc(Cl)cc1	2.67
913	101-20-2	Clc1ccc(NC(=O)Nc2ccc(Cl)c(Cl)c2)cc1	1.98
914	UNK-14	Clc1ccc(OCOCC#C)cc1	2.23
915	56348-72-2	Clc1ccc(Oc2ccc(Cl)c(Cl)c2)cc1Cl	4.34
916	35694-06-5	Clc1ccc(c(Cl)c1)-c1cc(Cl)c(Cl)c(Cl)c1Cl	5.88
917	41464-40-8	Clc1ccc(c(Cl)c1)-c1cc(Cl)ccc1Cl	4.63
918	32598-10-0	Clc1ccc(c(Cl)c1)-c1ccc(Cl)c(Cl)c1	4.64
919	903-19-5	CC(C)(C)CC(C)(C)c1cc(O)c(cc1O)C(C)(C)CC(C)(C)C	2.48
920	2437-79-8	Clc1ccc(c(Cl)c1)-c1ccc(Cl)cc1Cl	4.32
921	36559-22-5	Clc1ccc(c(Cl)c1)-c1cccc(Cl)c1Cl	4.54
922	52633-78-2	Clc1ccc(c(Cl)c1Cl)-c1c(Cl)c(Cl)c(Cl)c(Cl)c1Cl	5.92
923	38380-07-3	Clc1ccc(c(Cl)c1Cl)-c1ccc(Cl)c(Cl)c1Cl	5.77
924	25323-68-6	Clc1ccc(c(Cl)c1Cl)-c1ccccc1	4.1
925	140-66-9	CC(C)(C)CC(C)(C)c1ccc(O)cc1	2.44
926	16606-02-3	Clc1ccc(cc1)-c1cc(Cl)ccc1Cl	4.13
927	2050-68-2	Clc1ccc(cc1)-c1ccc(Cl)cc1	3.58
928	7012-37-5	Clc1ccc(cc1)-c1ccc(Cl)cc1Cl	4.33
929	2051-62-9	Clc1ccc(cc1)-c1ccccc1	2.56
930	50-29-3	Clc1ccc(cc1)C(c1ccc(Cl)cc1)C(Cl)(Cl)Cl	4.57
931	80-07-9	Clc1ccc(cc1)S(=O)(=O)c1ccc(Cl)cc1	1.94
932	38380-03-9	Clc1ccc(cc1Cl)-c1c(Cl)ccc(Cl)c1Cl	5.04
933	57465-28-8	Clc1ccc(cc1Cl)-c1cc(Cl)c(Cl)c(Cl)c1	5.81
934	31508-00-6	Clc1ccc(cc1Cl)-c1cc(Cl)c(Cl)cc1Cl	4.58
935	32598-14-4	Clc1ccc(cc1Cl)-c1ccc(Cl)c(Cl)c1Cl	4.57
936	38444-86-9	Clc1ccc(cc1Cl)-c1ccccc1Cl	4.36
937	131-09-9	Clc1ccc2C(=O)c3ccccc3C(=O)c2c1	2.31
938	75-64-9	CC(C)(C)N	0.66
939	67028-18-6	Clc1ccc2Oc3c(Cl)c(Cl)c(Cl)cc3Oc2c1	3.3
940	33857-26-0	Clc1ccc2Oc3cc(Cl)ccc3Oc2c1	2.46
941	4620-70-6	CC(C)(C)NCCO	0.3
942	541-73-1	Clc1cccc(Cl)c1	2.57
943	15968-05-5	Clc1cccc(Cl)c1-c1c(Cl)cccc1Cl	3.85
944	12002-48-1	Clc1cccc(Cl)c1Cl	3.02
945	41464-51-1	Clc1cccc(c1Cl)-c1cc(Cl)c(Cl)cc1Cl	5.43
946	75-65-0	CC(C)(C)O	0.54
947	38444-93-8	Clc1cccc(c1Cl)-c1cccc(Cl)c1Cl	4.23
948	25512-42-9	Clc1cccc(c1Cl)-c1ccccc1	4
949	82-44-0	Clc1cccc2C(=O)c3ccccc3C(=O)c12	2.39
950	90-13-1	Clc1cccc2ccccc12	2.63
951	108-90-7	Clc1ccccc1	1.34
952	26601-64-9	Clc1ccccc1-c1c(Cl)c(Cl)c(Cl)c(Cl)c1Cl	3.83
953	27323-18-8	Clc1ccccc1-c1ccccc1	5.3
954	13029-08-8	Clc1ccccc1-c1ccccc1Cl	3.47
955	95-50-1	Clc1ccccc1Cl	2.43
956	782-74-1	Clc1ccccc1NNc1ccccc1Cl	3.66
957	109-09-1	Clc1ccccn1	1.28
958	1072957-71-1	Cn1cc(C(O)=Nc2cccc3C4CCC(C4=C(Cl)Cl)c23)c(n1)C(F)F	2.48
959	76-12-0	FC(Cl)(Cl)C(F)(Cl)Cl	1.84
960	75-69-4	FC(Cl)(Cl)Cl	1.32
961	124-73-2	FC(F)(Br)C(F)(F)Br	1.56
962	76-13-1	FC(F)(Cl)C(F)(Cl)Cl	1.66
963	75-91-2	CC(C)(C)OO	0.58
964	76-14-2	FC(F)(Cl)C(F)(F)Cl	1.49
965	75-71-8	FC(F)(Cl)Cl	0.84
966	306-83-2	FC(F)(F)C(Cl)Cl	1.36
967	307-34-6	FC(F)(F)C(F)(F)C(F)(F)C(F)(F)C(F)(F)C(F)(F)C(F)(F)C(F)(F)F	3.59
968	335-57-9	FC(F)(F)C(F)(F)C(F)(F)C(F)(F)C(F)(F)C(F)(F)C(F)(F)F	3.5
969	335-36-4	FC(F)(F)C(F)(F)C(F)(F)C(F)(F)C1(F)OC(F)(F)C(F)(F)C1(F)F	3.48
970	311-89-7	FC(F)(F)C(F)(F)C(F)(F)C(F)(F)N(C(F)(F)C(F)(F)C(F)(F)C(F)(F)F)C(F)(F)C(F)(F)C(F)(F)C(F)(F)F	1.42
971	98-56-6	FC(F)(F)c1ccc(Cl)cc1	2.21
972	33027-68-8	FP1(F)=NP(F)(Oc2ccccc2)=NP(F)(F)=N1	1.71
973	10461-98-0	N#CC(=C1CCCCC1)c1ccccc1	2.5
974	113-00-8	NC(N)=N	-1
975	497-18-7	NNC(=O)NN	0.65
976	96-91-3	Nc1cc(cc(c1O)[N+]([O-])=O)[N+]([O-])=O	0.47
977	3576-88-3	Nc1nc(N)nc(Nc2nc(N)nc(N)n2)n1	-1
978	5-6956	O(c1ccccc1)P1(Oc2ccccc2)=NP(Oc2ccccc2)(Oc2ccccc2)=NP(Oc2ccccc2)(Oc2ccccc2)=N1	1.64
979	26234-46-8	O=C1C2C3CC(C=C3)C2C(=O)N1c1ccccc1	1.08
980	1193-65-3	O=C1CN2CCC1CC2	0.77
981	85209-91-2	CC(C)(C)c1cc2Cc3cc(cc(c3OP([O-])(=O)Oc2c(c1)C(C)(C)C)C(C)(C)C)C(C)(C)C	0.24
982	3848-51-9、18995-02-3	O=P(Nc1ccccc1)(Oc1ccccc1)Oc1ccccc1	1.86
983	17270-01-8	O=P(Oc1ccccc1)(Oc1ccccc1)Oc1ccc(cc1)-c1ccc(OP(=O)(Oc2ccccc2)Oc2ccccc2)cc1	0.93
984	1204225-72-8	O=P(Oc1ccccc1)(Oc1ccccc1)Oc1ccccc1-c1ccccc1	2.82
985	3279-07-0	CC(C)(C)c1ccc(O)c(c1)[N+]([O-])=O	1.76
986	2-4099	OC(=O)C(F)(OC(F)(F)C(F)(F)C(F)(F)F)C(F)(F)F	1.48
987	1934210	OC(=O)C1=NN(C(=O)C1=NNc1ccc(cc1)S(O)(=O)=O)c1ccc(cc1)S(O)(=O)=O	0.48
988	46382-54-1	OC(=O)C1CC2CC1C1C3CC(C=C3)C21	1.72
989	53826-12-3	OC(=O)CC(F)(F)C(F)(F)C(F)(F)C(F)(F)C(F)(F)C(F)(F)F	1.08
990	5-6936	OC1=C(C(=O)c2c1c(Cl)c(Cl)c(Cl)c2Cl)c1ccc2cc(cc(N3C(=O)c4c(C3=O)c(Cl)c(Cl)c(Cl)c4Cl)c2n1)S(O)(=O)=O	2.48
991	647-42-7	OCCC(F)(F)C(F)(F)C(F)(F)C(F)(F)C(F)(F)C(F)(F)F	1.76
992	2043-47-2	OCCC(F)(F)C(F)(F)C(F)(F)C(F)(F)F	1.57
993	124-64-1	OCP(CO)(CO)CO	1.97
994	5-6971	CC(C)(C)c1nn(c(N)c1N=Nc1c(cnn1-c1cc(cc(c1)C(O)=O)C(O)=O)C#N)-c1nc(O)nc(n1)-n1nc(c(N=Nc2c(cnn2-c2cc(cc(c2)C(O)=O)C(O)=O)C#N)c1N)C(C)(C)C	0.4
995	34335-10-9	OP(O)(=O)c1ccccc1	1.42
996	13464-24-9	CC(C)(CC(=C)c1ccc(O)cc1)c1ccc(O)cc1	1.59
997	5-6931	OS(=O)(=O)c1ccc2c3nn(nc3ccc2c1)-c1ccc(cc1)N=Nc1ccc(C=Cc2ccc(cc2S(O)(=O)=O)-n2nc3cc(c4ccccc4c3n2)S(O)(=O)=O)c(c1)S(O)(=O)=O	0.52
998	26545584	OS(=O)(=O)c1cccc2cc(Cc3ccc4c(cccc4c3)S(O)(=O)=O)ccc12	1
999	4-1936	CC(C)(O)C(=O)c1ccc(Cc2ccc(cc2)C(=O)C(C)(C)O)cc1	1.3
1000	250736-57-3	[N-]=[N+]=C(S(=O)(=O)C1CCCC2(C1)OCCO2)S(=O)(=O)C1CCCC2(C1)OCCO2	1.43
1001	2691-41-0	[O-][N+](=O)N1CN(CN(CN(C1)[N+]([O-])=O)[N+]([O-])=O)[N+]([O-])=O	-0.3
1002	1544-19-0	CC(C)(c1ccc(OC(F)(F)C(F)F)cc1)c1ccc(OC(F)(F)C(F)F)cc1	4.35
1003	3-4602	[O-][N+](=O)c1cc(c(Cl)c(c1Cl)[N+]([O-])=O)C(F)(F)F	2.46
1004	225-11-6	c1ccc2nc3ccc4ccccc4c3cc2c1	2.02
1005	UNK-18	CC(C)C(C)C(C)(C)c1ccc(OC(F)(F)C(F)F)cc1	3.71
1006	4-1934	CC(C)C1CCC(C)(CC1c1ccc(O)cc1)c1ccc(O)cc1	2.12
1007	32588-76-4	Brc1c2C(=O)N(CCN3C(=O)c4c(C3=O)c(Br)c(Br)c(Br)c4Br)C(=O)c2c(Br)c(Br)c1Br	0.26
1008	UNK-02	CC(C)CC(C)(c1ccc(OC(F)(F)C(F)F)cc1)c1ccc(OC(F)(F)C(F)F)cc1	3.76
1009	25154523	CC(C)CC(C)CC(C)c1ccc(O)cc1	2.19
1010	183677-34-1	CC(C)CC(C)c1sccc1N	1.78
1011	57055397	CC(C)c1c(Cl)cc2c(CCC3C(C)(CCCC23C)C(O)=O)c1Cl	2.18
1012	1322936	CC(C)c1cc2cccc(C(C)C)c2cc1S(O)(=O)=O	0.6
1013	38640629	CC(C)c1ccc2cccc(C(C)C)c2c1	3.27
1014	25640-78-2	CC(C)c1ccccc1-c1ccccc1	3.84
1015	2-4113	CC(OC(F)(F)C(F)C(F)(F)F)C(F)(F)C(F)C(F)(F)F	3.13
1016	2-4091	CC(S)CC(=O)OCC(COC(=O)CC(C)S)(COC(=O)CC(C)S)COC(=O)CC(C)S	2.23
1017	50-28-2	CC12CCC3C(CCc4cc(O)ccc34)C1CCC2O	1.69
1018	33704-61-9	CC1C(C)(C)C2=C(C(=O)CCC2)C1(C)C	2.02
1019	160535-46-6	CC1CCCCC1NC(=O)CC(CC(=O)NC1CCCCC1C)C(=O)NC1CCCCC1C	1.41
1020	2122-19-2	CC1CNC(=S)N1	1
1021	5-6906	CC1COC(Cn2cncn2)(O1)c1ccc(Oc2ccc(Cl)cc2)cc1Cl	1.98
1022	97038-96-5	Brc1cccc(Br)c1-c1c(Br)cccc1Br	4.97
1023	71048-82-3	CC=CC(=O)C1C(C)C=CCC1(C)C	2.14
1024	6842155	CC=CC(C)CC(C)CC(C)C	3.25
1025	UNK-21	CCC(COCC(F)(F)C(F)(F)F)OC(=O)CC(C(C(=O)OC(CC)COCC(F)(F)C(F)(F)F)S(O)(=O)=O)C(=O)OC(CC)COCC(F)(F)C(F)(F)F	1.29
1026	80793-17-5	CCC(F)(F)C(F)(F)C(F)(F)C(F)(F)C(F)(F)C(F)(F)F	3.41
1027	208338-50-5	CCCC1CCC(CC1)C1CCC(CC1)C(F)(F)Oc1cc(F)c(F)c(F)c1	1.28
1028	116020-44-1	CCCC1CCC(CC1)C1CCC(CC1)C=C	2.89
1029	111158-11-3	CCCC1CCC(CC1)c1ccc(I)cc1	2.83
1030	174350-05-1	CCCC1CCC(CC1)c1ccc(OCC)c(F)c1F	1.87
1031	5-6933	CCCC1OC(OC2C(OC(OC12)c1ccc(CCC)cc1)C(O)CO)c1ccc(CCC)cc1	2.18
1032	371146-04-2	CCCCC(CC)C(=O)OCCOc1ccc(c(O)c1)-c1nc(nc(n1)-c1ccccc1)-c1ccccc1	1.77
1033	UNK-03	CCCCC(CC)C(c1ccc(OC(F)(F)C(F)F)cc1)c1ccc(OC(F)(F)C(F)F)cc1	3.19
1034	5-6950	CCCCC(CC)CN(CC(CC)CCCC)C(=O)C(C)NC(=O)Nc1cccc(c1)-c1nn2nc(c(Cl)c2[nH]1)C(C)(C)C	1.81
1035	3-4614	CCCCC(CC)COC(=O)CCc1cc(c(O)c(c1)C(C)(C)C)C(C)(C)C	1.76
1036	79983-71-4	CCCCC(O)(Cn1cncn1)c1ccc(Cl)cc1Cl	1.61
1037	124729-02-8	CCCCCC1CCC(CC1)c1ccc(OCC)c(F)c1F	2.07
1038	UNK-05	CCCCCCC(C)(c1ccc(OC(F)(F)C(F)F)cc1)c1ccc(OC(F)(F)C(F)F)cc1	2.85
1039	5-6910	CCCCCCC(CCCC)COCC(C[N+]1=Cc2ccccc2CC1)OS(O)(=O)=O	1.03
1040	5-6904	C(Oc1c2ccccc2c(OCC2CO2)c2ccccc12)C1CO1	2.29
1041	134701-20-5	CCCCCCCCCCCCCCC(C)c1cc(C)cc(C)c1O	0.78
1042	930-10-9	CCCCCCCCCCCCCOCCOCCOCCOCCOCCOCCOCCOCCO	1.5
1043	3-4611	CCCCCCCCCCCCSCCC(=O)Oc1cc(C)c(Sc2cc(c(O)cc2C)C(C)(C)C)cc1C(C)(C)C	1.49
1044	5-6898	CCCCCCCCCC[n+]1cccc(COCCCCOCc2ccc[n+](CCCCCCCCCC)c2)c1	2
1045	UNK-04	CCCCCCCc1ccc(OC(F)(F)C(F)F)cc1	2.96
1046	5-6939	CCCCCCS(=O)(=O)c1ccc(Nc2ccc3n(C)c(=O)c(C(=O)c4cccc(c4)S(O)(=O)=O)c4-c5ccccc5C(=O)c2c34)c(c1)S(O)(=O)=O	1.85
1047	2528-38-3	CCCCCOP(=O)(OCCCCC)OCCCCC	2.48
1048	88358-74-1	CCCCN(CCCC)c1ccc(cc1)[N+](=C1C=CC(C=C1)=[N+](c1ccc(cc1)N(CCCC)CCCC)c1ccc(cc1)N(CCCC)CCCC)c1ccc(cc1)N(CCCC)CCCC	1.8
1049	727678-39-9	CCCCOCCCN1C(=Nc2ccccc2S1(=O)=O)C(N1C(=O)OC(C)(C)C1=O)C(=O)Nc1cc(ccc1SCC(CC)CCCC)C(C)(C)C	1.11
1050	25637-99-4	BrC1CC(Br)CC(Br)CC(Br)CC(Br)CC(Br)C1	4.26
1051	1461-22-9	CCCC[Sn](Cl)(CCCC)CCCC	3.3
1052	4-1955	CCCCc1ccc(cc1)-c1ccc(c(F)c1)-c1cc(F)c(c(F)c1)C(F)(F)Oc1cc(F)c(F)c(F)c1	1.41
1053	25638179	CCCCc1ccc2cccc(c2c1)S(O)(=O)=O	0.18
1054	759-94-4	CCCN(CCC)C(=O)SCC	1.78
1055	303186-20-1	CCCc1ccc(cc1)-c1cc(F)c(c(F)c1)C(F)(F)Oc1cc(F)c(F)c(F)c1	1.81
1056	95759-44-7	CCCc1ccc(cc1)-c1ccc(cc1F)-c1ccc(CC)cc1	1.93
1057	97-77-8	CCN(CC)C(=S)SSC(=S)N(CC)CC	2.35
1058	6337-43-5	CCOC(=O)C(=Cc1ccc(C=C(C(=O)OCC)C(=O)OCC)cc1)C(=O)OCC	1.28
1059	58567-11-6	CCOCOC1CCCCCCCCCCC1	2.74
1060	129211-47-8	C1CC[N+]2(C1)CCCC2	1.85
1061	156573-09-0	CCOc1ccc(Br)c(F)c1F	2.69
1062	181587-01-9	CCS(=O)c1c(N)n(nc1C#N)-c1c(Cl)cc(cc1Cl)C(F)(F)F	0.98
1063	5-6958	CC[NH+](CC)CCCNc1nc(NCCC[NH+](CC)CC)nc(Nc2ccc3c(O)c(N=Nc4ccc5[nH]c(=O)[nH]c5c4)c(cc3c2)S(O)(=O)=O)n1	1.52
1064	567776	CCc1ccc(C=C)cc1	2.69
1065	41611-76-1	CCc1cccc(C)c1Nc1ccc(Nc2c(C)cccc2CC)c2C(=O)c3ccccc3C(=O)c12	0.54
1066	13049-38-2	CCc1cccc(c1)-c1cccc(CC)c1	3.76
1067	307492-75-7	CCn1cc[n+](C)c1C	1.71
1068	2-4106	CN(C)CCCNC(N)=O	0.36
1069	731-27-1	CN(C)S(=O)(=O)N(SC(F)(Cl)Cl)c1ccc(C)cc1	1.95
1070	315-18-4	CNC(=O)Oc1cc(C)c(N(C)C)c(C)c1	1.42
1071	69806-40-2	COC(=O)C(C)Oc1ccc(Oc2ncc(cc2Cl)C(F)(F)F)cc1	1.23
1072	3-4620	COC(=O)c1ccc(OC(=O)c2cc(OC)c(OC)cc2OC)cc1	0.26
1073	5-6924	COC(=O)c1nc[nH]c1C(=O)OC	0.77
1074	132182-92-4	COC(F)(C(F)(F)C(F)(F)F)C(F)(C(F)(F)F)C(F)(F)F	3.41
1075	2-4093	COC(F)(F)C(F)(F)C(F)(F)F	1.46
1076	2355	COP(=S)(OC)Oc1ccc(Cl)cc1C#N	2.33
1077	33576-92-0	COP(=S)(OC)Oc1ccccc1	1.89
1078	21609-90-5	COP(=S)(Oc1cc(Cl)c(Br)cc1Cl)c1ccccc1	3.78
1079	6936-40-9	COc1c(Cl)c(Cl)cc(Cl)c1Cl	3.69
1080	938-22-7	COc1c(Cl)cc(Cl)c(Cl)c1Cl	3.34
1081	57057-83-7	COc1c(O)cc(Cl)c(Cl)c1Cl	2.41
1082	54135-82-9	COc1cc(Cl)c(Cl)c(Cl)c1	3.09
1083	83-79-4	COc1cc2OCC3Oc4c5CC(Oc5ccc4C(=O)C3c2cc1OC)C(C)=C	1.41
1084	4-1948	COc1ccc(N=Nc2c(O)c3ccc(N=Nc4c(N)c5c(O)c(N=Nc6ccc7c(O)c(N=Nc8ccccc8S(O)(=O)=O)c(cc7c6)S(O)(=O)=O)c(cc5cc4S(O)(=O)=O)S(O)(=O)=O)c(c3cc2S(O)(=O)=O)S(O)(=O)=O)c(c1)S(O)(=O)=O	0.48
1085	4531-49-1	COc1ccccc1NC(=O)C(N=Nc1ccc(cc1Cl)-c1ccc(N=NC(C(C)=O)C(=O)Nc2ccccc2OC)c(Cl)c1)C(C)=O	0.49
1086	3-4637	COc1ccccc1NC(=O)C(N=Nc1ccc(cc1[N+]([O-])=O)S(O)(=O)=O)C(C)=O	1
1087	7379-51-3	CSc1c(C)cc(O)cc1C	1.16
1088	105-06-6	C=Cc1ccc(C=C)cc1	2.48
1089	141-63-9	C[Si](C)(C)O[Si](C)(C)O[Si](C)(C)O[Si](C)(C)O[Si](C)(C)C	3.13
1090	108-57-6	C=Cc1cccc(C=C)c1	2.54
1091	83-42-1	Cc1c(Cl)cccc1[N+]([O-])=O	1.99
1092	5-6909	Cc1c(N=Nc2nc(c(N=Nc3cc(c4cc(cc(c4c3)S(O)(=O)=O)S(O)(=O)=O)S(O)(=O)=O)s2)-c2ccc3ccccc3c2)c(Nc2ccc(cc2)S(O)(=O)=O)nc(Nc2ccc(cc2)S(O)(=O)=O)c1C#N	1.28
1093	26898179	Cc1cc(Cc2ccccc2)ccc1Cc1ccccc1	4
1094	875-35-4	Cc1cc(Cl)nc(Cl)c1C#N	0.59
1095	4-1949	Cc1cc(N=Nc2c(O)c3ccc(N=Nc4c(Nc5ccccc5)ccc5c(O)c(N=Nc6ccc7c(O)c(N=Nc8ccccc8S(O)(=O)=O)c(cc7c6)S(O)(=O)=O)c(cc45)S(O)(=O)=O)c(c3cc2S(O)(=O)=O)S(O)(=O)=O)c(OCCCS(O)(=O)=O)cc1N=Nc1cc(cc2cc(cc(O)c12)S(O)(=O)=O)S(O)(=O)=O	1.59
1096	30171803	Cc1cc(OCC2CO2)cc(Br)c1Br	1.11
1097	19956-76-4	Cc1cc(c(C)c(C)c1O)-c1cc(C)c(O)c(C)c1C	2.65
1098	2144-53-8	CC(=C)C(=O)OCCC(F)(F)C(F)(F)C(F)(F)C(F)(F)C(F)(F)C(F)(F)F	1.08
1099	4-1950	CC(=C)C1CC2CC1C=C2	2.98
1100	89-59-8	Cc1ccc(Cl)cc1[N+]([O-])=O	1.92
1101	155041-85-3	Cc1ccc(cc1)C1CCC(CC1)C1CCC(CC1)C=C	2.08
1102	135861-56-2	Cc1ccc(cc1C)C1OCC2OC(OC(C(O)CO)C2O1)c1ccc(C)c(C)c1	1.23
1103	121-86-8	Cc1ccc(cc1Cl)[N+]([O-])=O	1.69
1104	2531-84-2	Cc1ccc2c(ccc3ccccc23)c1	3.48
1105	143-50-0	ClC12C(=O)C3(Cl)C4(Cl)C1(Cl)C1(Cl)C2(Cl)C3(Cl)C4(Cl)C1(Cl)Cl	3.19
1106	28680-44-6	ClC1=C(Cl)C2(Cl)CC1(Cl)C(Cl)=C2Cl	3.81
1107	2440-02-0	ClC1CC2(Cl)C(Cl)=C(Cl)C1(Cl)C2(Cl)Cl	4.05
1108	20298-69-5	CC(=O)OC1CCCCC1C(C)(C)C	2.28
1109	639-58-7	Cl[Sn](c1ccccc1)(c1ccccc1)c1ccccc1	3.14
1110	75627-02-0	Clc1cc(Cl)c2c(oc3c(Cl)cc(Cl)c(Cl)c23)c1Cl	2.96
1111	19408-74-3	Clc1cc2Oc3cc(Cl)c(Cl)c(Cl)c3Oc2c(Cl)c1Cl	3.92
1112	60851-34-5	Clc1cc2c(oc3c(Cl)c(Cl)c(Cl)cc23)c(Cl)c1Cl	3.98
1113	70648-26-9	Clc1cc2oc3c(Cl)c(Cl)c(Cl)c(Cl)c3c2cc1Cl	3.9
1114	57117-44-9	Clc1cc2oc3c(Cl)c(Cl)c(Cl)cc3c2c(Cl)c1Cl	3.94
1115	92341-06-5	Clc1cc2oc3c(Cl)c(Cl)cc(Cl)c3c2c(Cl)c1Cl	3.2
1116	57117-41-6	Clc1cc2oc3cc(Cl)c(Cl)c(Cl)c3c2cc1Cl	3.58
1117	16611-67-9	Clc1ccc(Cl)c(c1)C(=O)c1ccccc1	1.89
1118	51892-26-3	Clc1ccc(Oc2ccccc2)c(Cl)c1	3.97
1119	UNK-06	CC(C)(C)CC(C)(C)c1ccc(OC(F)(F)C(F)F)cc1	3.92
1120	39227286	Clc1ccc2Oc3c(Cl)c(Cl)c(Cl)c(Cl)c3Oc2c1Cl	4
1121	79060-60-9	Clc1ccc2c(oc3c(Cl)c(Cl)c(Cl)c(Cl)c23)c1Cl	2.78
1122	57117-43-8	Clc1ccc2c(oc3c(Cl)c(Cl)c(Cl)cc23)c1Cl	3.57
1123	57117-39-2	Clc1ccc2c(oc3cc(Cl)c(Cl)cc23)c1Cl	2.72
1124	55720-37-1	Clc1ccc2cc(Cl)cc(Cl)c2c1	4.43
1125	2050-74-0	Clc1cccc2cccc(Cl)c12	3.79
1126	134605-64-4	Cn1c(cc(=O)n(-c2ccc(Cl)c(c2)C(=O)OC(C)(C)C(=O)OCC=C)c1=O)C(F)(F)F	0.6
1127	25291-17-2	FC(F)(F)C(F)(F)C(F)(F)C(F)(F)C(F)(F)C(F)(F)C=C	2.58
1128	701909-41-3	FC(F)(F)C(F)(F)C(F)(F)C(F)(F)CCOC(=O)C(Cl)=C	1.87
1129	52591-27-2	FC(F)(F)C(F)(F)C(F)(F)C(F)(F)CCOC(=O)C=C	1.72
1130	180409-60-3	Fc1ccc(c(C(NOCC2CC2)=NC(=O)Cc2ccccc2)c1F)C(F)(F)F	2.72
1131	79-06-1	NC(=O)C=C	0.09
1132	6607	Nc1c(Cl)c(Cl)nc(C(O)=O)c1Cl	-1.7
1133	66215-27-8	Nc1nc(N)nc(NC2CC2)n1	0
1134	nd	O(P(Oc1ccccc1)Oc1ccccc1)c1ccccc1	2.39
1135	28984-87-4	O(c1ccc(cc1)-c1ccccc1)c1ccc(cc1)-c1ccccc1	3.14
1136	262-12-4	O1c2ccccc2Oc2ccccc12	3.85
1137	84-65-1	O=C1c2ccccc2C(=O)c2ccccc12	2
1138	91-64-5	O=c1ccc2ccccc2o1	1.31
1139	375-95-1	OC(=O)C(F)(F)C(F)(F)C(F)(F)C(F)(F)C(F)(F)C(F)(F)C(F)(F)C(F)(F)F	3.4
1140	113136-77-9	OC(=O)C1(CC1)C(=O)Nc1ccc(Cl)cc1Cl	-0.4
1141	110-16-7	OC(=O)C=CC(O)=O	1
1142	698836	OC(=O)Cn1c2c(Cl)cccc2sc1=O	1.56
1143	84087-01-4	OC(=O)c1c(Cl)ccc2cc(Cl)cnc12	-0.1
1144	586-76-5	OC(=O)c1ccc(Br)cc1	1.2
1145	1702-17-6	OC(=O)c1nc(Cl)ccc1Cl	0
1146	3010-80-8	OC(c1ccc(Cl)cc1)(c1ccc(Cl)cc1)c1ccc(Cl)cc1	3.95
1147	56803-37-3	CC(C)(C)c1ccccc1OP(=O)(Oc1ccccc1)Oc1ccccc1	3.03
1148	4404-43-7	OCCN(CCO)c1nc(Nc2ccccc2)nc(Nc2ccc(C=Cc3ccc(Nc4nc(Nc5ccccc5)nc(n4)N(CCO)CCO)cc3S(O)(=O)=O)c(c2)S(O)(=O)=O)n1	0.84
1149	107-21-1	OCCO	-0.5
1150	1689-83-4	Oc1c(I)cc(cc1I)C#N	1.46
1151	nd	Oc1cc(Cl)c(Cl)c(Cl)c1Cl	2.15
1152	123-31-9	Oc1ccc(O)cc1	1.57
1153	88-30-2	Oc1ccc(c(c1)C(F)(F)F)[N+]([O-])=O	1.1
1154	55-63-0	[O-][N+](=O)OCC(CO[N+]([O-])=O)O[N+]([O-])=O	0.97
1155	nd	[O-][N+](=O)c1ccc(cc1)[N+]([O-])=O	-0.4
1156	nd	[O-][N+](=O)c1cccc(c1)[N+]([O-])=O	0.77
1157	198-55-0	c1cc2cccc3c4cccc5cccc(c(c1)c23)c45	2.38
1158	271-89-6	c1cc2ccccc2o1	2.56
1159	605-02-7	c1ccc(cc1)-c1cccc2ccccc12	3.51
1160	217-59-4	c1ccc2c(c1)c1ccccc1c1ccccc21	2.41
1161	53-70-3	c1ccc2c(c1)ccc1cc3c(ccc4ccccc34)cc21	2.8
1162	10453-86-8	CC(C)=CC1C(C(=O)OCc2coc(Cc3ccccc3)c2)C1(C)C	3.55
1163	70124-77-5	CC(C)C(C(=O)OC(C#N)c1cccc(Oc2ccccc2)c1)c1ccc(OC(F)F)cc1	3.6
1164	22907-72-8	CC(C)C1CCC(CC1)C(C)C	3.5
1165	27193-29-9	CC(C)C1CCCC2CCCCC12	3.58
1166	126690-66-2	CC(C)CC(C)=CC(C)C	3.29
1167	219750-66-0	CC(C)CC1CC(C)CCC1C	3.37
1168	1678-98-4	CC(C)CC1CCCCC1	3.3
1169	27458-92-0	CC(C)CCCCCCCCCCO	2.73
1170	25339-17-7	CC(C)CCCCCCCO	2.51
1171	17348-59-3	CC(C)OC(C)(C)C	0.76
1172	1817-47-6	CC(C)c1ccc(cc1)[N+]([O-])=O	2.18
1173	123-48-8	CC(CC(C)(C)C)=CC(C)(C)C	3.29
1174	67564-91-4	CC(CN1CC(C)OC(C)C1)Cc1ccc(cc1)C(C)(C)C	3.03
1175	67306-00-7	CC(CN1CCCCC1)Cc1ccc(cc1)C(C)(C)C	2.2
1176	68-19-9	CC(CNC(=O)CCC1(C)C(CC(N)=O)C2N=C1C(C)=C1N=C(C=C3N=C(C(C)=C4C(CCC(N)=O)C(C)(CC(N)=O)C2(C)N4[Co+]C#N)C(C)(CC(N)=O)C3CCC(N)=O)C(C)(C)C1CCC(N)=O)OP(O)(=O)OC1C(CO)OC(C1O)n1cnc2cc(C)c(C)cc12	0.48
1177	95737-68-1	CC(COc1ccc(Oc2ccccc2)cc1)Oc1ccccn1	3.14
1178	22311-25-7	Brc1ccc(Br)c(Br)c1Br	3.18
1179	7085-19-0	CC(Oc1ccc(Cl)cc1C)C(O)=O	0.48
1180	95977-29-0	CC(Oc1ccc(Oc2ncc(cc2Cl)C(F)(F)F)cc1)C(O)=O	0.94
1181	68085-85-8	CC1(C)C(C=C(Cl)C(F)(F)F)C1C(=O)OC(C#N)c1cccc(Oc2ccccc2)c1	3.29
1182	131983-72-7	CC1(C)CCC(=Cc2ccc(Cl)cc2)C1(O)Cn1cncn1	0.78
1183	57-63-6	CC12CCC3C(CCc4cc(O)ccc34)C1CCC2(O)C#C	2.9
1184	1222-05-5	CC1C(C)(C)c2cc3COCC(C)c3cc2C1(C)C	3.02
1185	1330-16-1	CC1C=CC2CC1C2(C)C	2.61
1186	933-12-0	CC1CC(C)(C)CC=C1	2.87
1187	1506-02-1	CC1CC(C)(C)c2cc(C(C)=O)c(C)cc2C1(C)C	2.78
1188	50876-32-9	CC1CC(C)CC(C)(C)C1	3.65
1189	1839-63-0	CC1CC(C)CC(C)C1	3.34
1190	4175-54-6	CC1CCC(C)c2ccccc12	3.12
1191	65195-55-3	CCC(C)C1OC2(CC3CC(CC=C(C)C(OC4CC(OC)C(OC5CC(OC)C(O)C(C)O5)C(C)O4)C(C)C=CC=C4COC5C(O)C(C)=CC(C(=O)O3)C45O)O2)C=CC1C	1.75
1192	583-53-9	Brc1ccccc1Br	3.1
1193	74051-80-2	CCCC(=NOCC)C1C(=O)CC(CC(C)SCC)CC1=O	0.51
1194	66246-88-6	CCCC(Cn1cncn1)c1ccc(Cl)cc1Cl	1.97
1195	60207-90-1	CCCC1COC(Cn2cncn2)(O1)c1ccc(Cl)cc1Cl	2.06
1196	3074-71-3	CCCCC(C)C(C)C	3.32
1197	13150-81-7	CCCCC(C)CCCC(C)C	3.18
1198	19780-74-6	CCCCC(CC)CCC=C	3.43
1199	17302-11-3	CCCCCCC(CC)CC	3.32
1200	4292-75-5	CCCCCCC1CCCCC1	3.29
1201	62338-09-4	CCCCCCCC(C)C(C)(C)C	3.34
1202	111-84-2	CCCCCCCCC	3.15
1203	872-05-9	CCCCCCCCC=C	3.22
1204	112-41-4	CCCCCCCCCCC=C	3.4
1205	57-10-3	CCCCCCCCCCCCCCCC(O)=O	2.85
1206	36653-82-4	CCCCCCCCCCCCCCCCO	3.04
1207	47377-16-2	CCCCCCCCCCCCCCc1ccc(cc1)S(O)(=O)=O	0.52
1208	151-21-3	CCCCCCCCCCCCOS(O)(=O)=O	-0.03
1209	1987-50-4	CCCCCCCc1ccc(O)cc1	2.75
1210	111-27-3	CCCCCCO	-0.27
1211	84-75-3	CCCCCCOC(=O)c1ccccc1C(=O)OCCCCCC	3.24
1212	496-10-6	C1CC2CCCCC2C1	2.91
1213	17804-35-2	CCCCNC(=O)n1c(NC(=O)OC)nc2ccccc12	1.43
1214	71-36-3	CCCCO	-0.4
1215	111-76-2	CCCCOCCO	-0.22
1216	118134-30-8	CCCN(CC)CC1COC2(CCC(CC2)C(C)(C)C)O1	1.9
1217	99387-89-0	CCCOCC(=Nc1ccc(Cl)cc1C(F)(F)F)n1ccnc1	2.59
1218	34643-46-4	CCCSP(=S)(OCC)Oc1ccc(Cl)cc1Cl	3.01
1219	5915-41-3	CCNc1nc(Cl)nc(NC(C)(C)C)n1	0.85
1220	886-50-0	CCNc1nc(NC(C)(C)C)nc(SC)n1	1.95
1221	26259-45-0	CCNc1nc(NC(C)CC)nc(OC)n1	1.2
1222	1014-70-6	CCNc1nc(NCC)nc(SC)n1	0.31
1223	141-78-6	CCOC(C)=O	1.48
1224	944-22-9	CCOP(=S)(CC)Sc1ccccc1	1.89
1225	115-90-2	CCOP(=S)(OCC)Oc1ccc(cc1)S(C)=O	1.68
1226	2642-71-9	CCOP(=S)(OCC)SCn1nnc2ccccc2c1=O	2.27
1227	80844-07-1	CCOc1ccc(cc1)C(C)(C)COCc1cccc(Oc2ccccc2)c1	3.6
1228	100-41-4	CCc1ccccc1	1.19
1229	81335-77-5	CCc1cnc(C2=NC(=O)C(C)(N2)C(C)C)c(c1)C(O)=O	0.2
1230	79-57-2	CN(C)C1C2C(O)C3C(=C(O)C2(O)C(=O)C(C(N)=O)C1=O)C(=O)c1c(O)cccc1C3(C)O	-0.43
1231	33089-61-1	CN(C=Nc1ccc(C)cc1C)C=Nc1ccc(C)cc1C	3.26
1232	23135-22-0	CNC(=O)ON=C(SC)C(=O)N(C)C	0.3
1233	22259-30-9	CNC(=O)Oc1cccc(c1)N=CN(C)C	0
1234	83055-99-6	COC(=O)c1ccccc1CS(=O)(=O)NC(=O)Nc1nc(OC)cc(OC)n1	0.2
1235	79277-27-3	COC(=O)c1sccc1S(=O)(=O)NC(=O)Nc1nc(C)nc(OC)n1	-0.1
1236	114311-32-9	COCc1cnc(C2=NC(=O)C(C)(N2)C(C)C)c(c1)C(O)=O	-1
1237	52-68-6	COP(=O)(OC)C(O)C(Cl)(Cl)Cl	0.4
1238	300-76-5	COP(=O)(OC)OC(Br)C(Cl)(Cl)Br	0.93
1239	10113-28-7	COP(=O)(OC)Oc1ccccc1	2.76
1240	92-83-1	C1c2ccccc2Oc2ccccc12	3.62
1241	86-50-0	COP(=S)(OC)SCn1nnc2ccccc2c1=O	1.54
1242	107-13-1	C=CC#N	1.14
1243	nd	COc1c(Cl)c(Cl)c(Cl)c(Cl)c1OC	4.4
1244	nd	COc1cc(Cl)c(Cl)c(Cl)c1OC	3.5
1245	16766-31-7	COc1cc(Cl)cc(Cl)c1O	1.74
1246	1000766	COc1cc(Cl)ccc1Oc1ccc(Cl)cc1Cl	3.5
1247	82097-50-5	COc1nc(C)nc(NC(=O)NS(=O)(=O)c2ccccc2OCCCl)n1	0.11
1248	145701-23-1	COc1ncc(F)c2nc(nn12)S(=O)(=O)Nc1c(F)cccc1F	0.18
1249	7287-19-6	CSc1nc(NC(C)C)nc(NC(C)C)n1	1.93
1250	21087-64-9	CSc1nnc(c(=O)n1N)C(C)(C)C	1.02
1251	5902-51-2	Cc1[nH]c(=O)n(c(=O)c1Cl)C(C)(C)C	0.78
1252	39569-21-6	Cc1c(Cl)c(Br)c(Br)c(Br)c1Br	3.98
1253	79538-32-2	Cc1c(F)c(F)c(COC(=O)C2C(C=C(Cl)C(F)(F)F)C2(C)C)c(F)c1F	3.48
1254	nd	Cc1c(cccc1[N+]([O-])=O)[N+]([O-])=O	1.34
1255	57-97-6	Cc1c2ccccc2c(C)c2c1ccc1ccccc21	2.91
1256	121552-61-2	Cc1cc(nc(Nc2ccccc2)n1)C1CC1	2.59
1257	581-40-8	Cc1cc2ccccc2cc1C	2.71
1258	488-23-3	Cc1ccc(C)c(C)c1C	2.82
1259	78-32-0	Cc1ccc(OP(=O)(Oc2ccc(C)cc2)Oc2ccc(C)cc2)cc1	3.07
1260	475-03-6	Cc1ccc2c(CCCC2(C)C)c1	3.33
1261	829-26-5	Cc1ccc2cc(C)c(C)cc2c1	3
1262	56-49-5	Cc1ccc2cc3c(ccc4ccccc34)c3CCc1c23	3.17
1263	613-12-7	Cc1ccc2cc3ccccc3cc2c1	2.41
1264	2381-21-7	Cc1ccc2ccc3cccc4ccc1c2c34	2.73
1265	91-63-4	Cc1ccc2ccccc2n1	0.48
1266	563-04-2	Cc1cccc(OP(=O)(Oc2cccc(C)c2)Oc2cccc(C)c2)c1	2.31
1267	832-69-9	Cc1cccc2c1ccc1ccccc21	3.18
1268	95-53-4	Cc1ccccc1N	0.54
1269	76-01-7	ClC(Cl)C(Cl)(Cl)Cl	1.81
1270	72-54-8	ClC(Cl)C(c1ccc(Cl)cc1)c1ccc(Cl)cc1	4.48
1271	39801-14-4	ClC12C3C4(Cl)C5(Cl)C(Cl)(C1(Cl)C4(Cl)Cl)C2(Cl)C(Cl)(Cl)C35Cl	4.55
1272	117-80-6	ClC1=C(Cl)C(=O)c2ccccc2C1=O	4.04
1273	115-29-7	ClC1=C(Cl)C2(Cl)C3COS(=O)OCC3C1(Cl)C2(Cl)Cl	1.39
1274	nd	ClC1=C(Cl)C2(Cl)C=CC1(Cl)C2(Cl)Cl	3.81
1275	nd	ClC1C2(Cl)C=CC1(Cl)C(Cl)(Cl)C2(Cl)Cl	4.05
1276	50-04-4	CC(=O)OCC(=O)C1(O)CCC2C3CCC4=CC(=O)CCC4(C)C3C(=O)CC12C	1.3
1277	18259-05-7	Clc1c(Cl)c(Cl)c(c(Cl)c1Cl)-c1ccccc1	4.85
1278	52744-13-5	Clc1cc(Cl)c(Cl)c(c1)-c1c(Cl)ccc(Cl)c1Cl	5.54
1279	51908-16-8	Clc1cc(Cl)c(Cl)c(c1)-c1cc(Cl)c(Cl)cc1Cl	5.31
1280	33284-54-7	Clc1cc(Cl)c(Cl)c(c1Cl)-c1ccccc1	4.71
1281	33979-03-2	Clc1cc(Cl)c(c(Cl)c1)-c1c(Cl)cc(Cl)cc1Cl	3.36
1282	56558-16-8	Clc1cc(Cl)c(c(Cl)c1)-c1c(Cl)cccc1Cl	4.81
1283	56558-17-9	Clc1cc(Cl)c(c(Cl)c1)-c1ccc(Cl)c(Cl)c1	4.81
1284	35693-92-6	Clc1cc(Cl)c(c(Cl)c1)-c1ccccc1	3.93
1285	62796-65-0	Clc1cc(Cl)c(c(Cl)c1)-c1ccccc1Cl	3.88
1286	38380-04-0	Clc1cc(Cl)c(cc1Cl)-c1c(Cl)ccc(Cl)c1Cl	5.08
1287	81-14-1	CC(=O)c1c(C)c(c(c(c1C)[N+]([O-])=O)C(C)(C)C)[N+]([O-])=O	3.09
1288	31604-28-1	Clc1cc(Cl)c2c(Cl)ccc(Cl)c2c1	4.4
1289	53555-64-9	Clc1cc(Cl)c2cc(Cl)cc(Cl)c2c1	4.53
1290	33284-53-6	Clc1cc(c(Cl)c(Cl)c1Cl)-c1ccccc1	4.39
1291	29446-15-9	Clc1cc2Oc3ccccc3Oc2cc1Cl	2.88
1292	62615-08-1	Clc1cc2c(oc3c(Cl)cccc23)c(Cl)c1Cl	3.11
1293	2050-75-1	Clc1cc2ccccc2cc1Cl	4.04
1294	60145-21-3	Clc1ccc(Cl)c(c1)-c1c(Cl)cc(Cl)cc1Cl	4.58
1295	38379-99-6	Clc1ccc(Cl)c(c1)-c1c(Cl)ccc(Cl)c1Cl	4.78
1296	107534-96-3	CC(C)(C)C(O)(CCc1ccc(Cl)cc1)Cn1cncn1	2
1297	41464-42-0	Clc1ccc(Cl)c(c1)-c1cc(Cl)cc(Cl)c1	4.85
1298	52663-61-3	Clc1ccc(Cl)c(c1)-c1cc(Cl)cc(Cl)c1Cl	5.27
1299	104294-16-8	Clc1ccc(Oc2c(Cl)cc(Cl)cc2Cl)c(Cl)c1	3.95
1300	60123-64-0	Clc1ccc(Oc2cc(Cl)c(Cl)cc2Cl)c(Cl)c1	4.21
1301	61328-45-8	Clc1ccc(Oc2cc(Cl)c(Cl)cc2Cl)cc1	4.11
1302	60123-65-1	Clc1ccc(Oc2cc(Cl)c(Cl)cc2Cl)cc1Cl	4.08
1303	61328-46-9	Clc1ccc(Oc2ccc(Cl)c(Cl)c2)c(Cl)c1	4.24
1304	76738-62-0	CC(C)(C)C(O)C(Cc1ccc(Cl)cc1)n1cncn1	1.91
1305	28076-73-5	Clc1ccc(Oc2ccc(Cl)cc2Cl)c(Cl)c1	4.14
1306	59039-21-3	Clc1ccc(Oc2ccc(Cl)cc2Cl)cc1	3.79
1307	39485-83-1	Clc1ccc(c(Cl)c1)-c1c(Cl)cc(Cl)cc1Cl	3.72
1308	68194-05-8	Clc1ccc(c(Cl)c1)-c1c(Cl)ccc(Cl)c1Cl	4.18
1309	38380-01-7	Clc1ccc(c(Cl)c1)-c1cc(Cl)c(Cl)cc1Cl	4.86
1310	33284-50-3	Clc1ccc(c(Cl)c1)-c1ccccc1	3.55
1311	37680-66-3	Clc1ccc(c(Cl)c1)-c1ccccc1Cl	4.37
1312	52663-70-4	Clc1ccc(c(Cl)c1Cl)-c1c(Cl)c(Cl)cc(Cl)c1Cl	5.26
1313	38380-05-1	Clc1ccc(c(Cl)c1Cl)-c1c(Cl)ccc(Cl)c1Cl	4.88
1314	52663-58-8	Clc1ccc(cc1)-c1c(Cl)ccc(Cl)c1Cl	5.19
1315	38444-77-8	Clc1ccc(cc1)-c1c(Cl)cccc1Cl	5.08
1316	32690-93-0	Clc1ccc(cc1)-c1cc(Cl)c(Cl)cc1Cl	4.6
1317	38444-90-5	Clc1ccc(cc1)-c1ccc(Cl)c(Cl)c1	4.58
1318	33025-41-1	Clc1ccc(cc1)-c1ccc(Cl)c(Cl)c1Cl	4.58
1319	38444-85-8	Clc1ccc(cc1)-c1cccc(Cl)c1Cl	4.47
1320	34883-43-7	Clc1ccc(cc1)-c1ccccc1Cl	3.69
1321	38380-08-4	Clc1ccc(cc1Cl)-c1cc(Cl)c(Cl)c(Cl)c1Cl	5.88
1322	39227-61-7	Clc1ccc2Oc3c(Cl)c(Cl)c(Cl)c(Cl)c3Oc2c1	3.21
1323	38964-22-6	Clc1ccc2Oc3ccc(Cl)cc3Oc2c1	2.82
1324	74918-40-4	Clc1ccc2c(c1)oc1c(Cl)cccc21	3.01
1325	83704-22-7	Clc1ccc2c(c1)oc1cc(Cl)c(Cl)c(Cl)c21	3.41
1326	24423-11-8	Clc1ccc2c(ccc3ccccc23)c1	3.63
1327	2198-77-8	Clc1ccc2ccc(Cl)cc2c1	4.04
1328	nd	Clc1ccc2ccccc2c1	3.63
1329	5409-83-6	Clc1ccc2oc3ccc(Cl)cc3c2c1	3.66
1330	2050-67-1	Clc1cccc(c1)-c1cccc(Cl)c1	2.63
1331	52663-60-2	Clc1cccc(c1Cl)-c1c(Cl)ccc(Cl)c1Cl	5.15
1332	70362-47-9	Clc1ccccc1-c1cc(Cl)c(Cl)cc1Cl	5
1333	7580-85-0	CC(C)(C)OCCO	-0.22

## Sheet: PLS QSPR Model_Train_Test
			Training Set
No.	MLOGP	Cl-089	MaxdO	X1A	B03[C-N]	MaxsOH	logBCF
624	5.31405	0	13.2962	0.423148	1	0	3.47
757	3.80815	0	12.0597	0.442342	1	0	0.44
530	3.02553	0	0	0.465593	1	0	0.09
769	1.53889	0	9.99602	0.482645	1	0	2.45
94	4.90748	0	0	0.433844	0	10.6502	4.14
450	4.24453	0	13.3883	0.437167	1	0	3.15
477	2.44901	0	0	0.503193	1	0	2.85
108	4.23394	0	11.8051	0.454298	1	0	0.62
1140	2.31891	2	11.7917	0.441891	1	8.95067	-0.4
1162	3.90595	0	12.4019	0.439817	0	0	3.55
619	3.99332	0	13.0957	0.43338	1	0	3.16
1155	1.8859	0	10.1178	0.467422	1	0	-0.4
83	4.39634	0	0	0.425789	1	10.8924	3.74
138	2.61689	2	11.3457	0.422607	0	9.22252	0.32
180	2.77788	2	0	0.473638	0	8.6512	0.45
1041	7.14708	0	0	0.48231	0	10.2836	0.78
420	0.696545	0	0	0.464616	0	0	0.04
142	-1.16923	0	10.1452	0.492799	0	8.28215	1.75
728	5.47353	0	0	0.434714	0	10.317	0.79
520	3.29086	0	0	0.551777	0	0	1.82
1098	4.78422	0	10.8299	0.445276	0	0	1.08
1136	1.97819	0	0	0.433291	0	0	3.85
109	5.10854	0	0	0.436554	0	10.7314	3.94
1205	5.20608	0	10.3007	0.515886	0	8.49062	2.85
500	7.96778	0	0	0.478229	1	0	1
346	1.74159	0	11.1214	0.487778	0	0	-0.68
155	-0.129194	0	10.2947	0.467422	1	8.42688	0.56
384	0.995611	0	9.75694	0.490563	0	7.98611	0.85
990	3.63546	8	13.6444	0.418018	1	11.0934	2.48
528	3.084	0	11.5864	0.449317	0	9.4394	-0.36
327	2.36075	0	11.6137	0.433913	0	9.51095	0.1
879	1.0449	0	10.9548	0.459979	0	9.16176	2.12
1054	1.97128	0	11.412	0.523341	1	0	1.78
433	2.7021	0	10.6827	0.463477	1	9.7027	0.36
651	2.37835	0	11.6497	0.465578	1	0	0.24
1287	3.71963	0	11.7525	0.447975	1	0	3.09
50	0.481034	0	11.3053	0.430081	1	9.69948	0.9
997	3.00426	0	12.6051	0.41947	1	10.1906	0.52
135	4.17019	0	9.7233	0.435141	0	7.57399	0.98
132	5.99737	0	9.85471	0.428983	0	7.62672	4.36
705	9.59337	0	0	0.425744	0	11.6342	0.46
1226	1.47896	0	12.3049	0.458794	1	0	2.27
383	3.494	0	10.7298	0.456472	0	8.82716	0.35
202	4.80425	6	0	0.442498	0	10.0188	2.07
452	6.62745	0	13.2231	0.483077	0	0	0.27
51	6.36198	0	14.6818	0.425744	1	11.4544	0.27
1239	2.0139	0	11.4534	0.476894	0	0	2.76
61	4.65872	0	11.1257	0.441064	1	10.6835	3.68
178	2.77788	2	0	0.475322	0	8.73037	0.39
609	0.817401	0	0	0.475566	0	0	1.72
893	2.3703	1	10.0747	0.480633	0	0	0.32
260	-0.0494597	0	0	0.707107	0	0	1.29
326	1.39307	0	0	0.490524	0	9.49421	-0.1
1236	1.38734	0	12.1266	0.447424	1	9.37532	-1
1002	5.15237	0	0	0.44179	0	0	4.35
592	4.42668	0	0	0.445277	0	10.48	3.51
141	5.69101	0	13.3366	0.442761	0	0	3.2
422	2.45318	0	12.2055	0.481573	1	8.56705	1.71
1121	5.45269	6	0	0.425258	0	0	2.78
759	2.6866	0	0	0.433536	1	9.81271	2.47
296	5.16473	0	0	0.446633	0	0	1.84
1055	6.85756	0	0	0.441195	0	0	1.81
403	3.79488	0	0	0.473462	0	0	2.34
548	2.50988	0	0	0.48257	1	0	0.38
887	5.59337	0	0	0.459636	0	0	4.3
590	1.81696	0	0	0.582843	0	0	1.69
1001	2.35709	0	10.6566	0.460906	1	0	-0.3
361	4.23031	0	0	0.447918	0	0	4.11
806	1.8212	0	11.9023	0.435274	1	0	2.2
933	6.23212	5	0	0.443671	0	0	5.81
1101	5.85695	0	0	0.446015	0	0	2.08
444	3.81086	0	0	0.491481	0	0	3.42
39	-1.45757	0	0	0.567514	0	0	1.1
535	1.58711	0	0	0.557678	0	0	0.2
431	4.39872	0	0	0.462537	1	0	0.93
465	6.43687	0	0	0.527614	0	0	1.64
1057	1.7612	0	0	0.506619	0	0	2.35
236	2.06125	0	12.0931	0.444335	0	9.10148	-0.18
1069	2.85209	0	12.1407	0.449344	1	0	1.95
767	3.32712	0	12.8205	0.430255	1	9.85524	1.83
642	1.2094	0	0	0.512132	0	0	0.18
649	4.46048	4	11.8882	0.466501	0	0	1.65
977	1.18228	0	0	0.445827	1	0	-1
852	5.03175	8	0	0.427158	0	0	2.94
254	4.41198	0	0	0.463299	0	0	0.9
479	6.86537	0	0	0.479378	0	0	1.54
1235	1.20517	0	12.2743	0.4524	1	0	-0.1
1060	-1.80214	0	0	0.441421	0	0	1.85
402	1.62166	0	0	0.447393	1	0	0
1231	4.89913	0	0	0.454452	1	0	3.26
196	4.95173	0	0	0.44616	0	11.6353	3.78
737	1.91983	0	12.5263	0.432306	1	11.2637	1.53
285	3.72123	0	12.113	0.458939	1	0	0.94
514	5.0882	0	0	0.446633	0	0	4.17
533	3.09243	1	11.7084	0.479265	1	0	2.27
568	2.98695	0	12.1567	0.466849	1	0	2
467	5.5527	0	10.9118	0.502983	0	8.9331	0.22
246	2.83546	0	12.1621	0.431494	0	9.69706	2.32
975	-1.83506	0	9.70833	0.561612	0	0	0.65
834	2.45911	0	0	0.561612	0	0	0.6
583	0.180172	0	0	0.515165	0	0	0.2
570	1.84492	0	0	0.48149	1	0	2.96
1179	2.37779	1	10.5308	0.464493	0	8.63773	0.48
696	-1.13874	0	0	0.461663	1	0	-0.26
317	2.25492	0	0	0.5	0	0	0.64
25	3.08843	0	0	0.461373	1	0	0.8
1171	1.94034	0	0	0.488072	0	0	0.76
1223	0.586172	0	9.82153	0.554011	0	0	1.48
70	0.893132	0	0	0.473462	1	0	1.8
983	7.38235	0	13.7347	0.439924	0	0	0.93
1110	5.45269	6	0	0.424457	0	0	2.96
481	9.38975	0	13.8831	0.50455	0	0	0.09
113	2.8225	0	11.6527	0.455501	0	0	0.6
734	2.90192	0	0	0.431312	0	0	0.92
802	4.00234	0	0	0.467753	0	0	3.48
111	2.21454	0	12.3678	0.424088	1	0	0.4
407	1.94661	0	11.0127	0.44948	0	0	0.34
110	3.587	0	11.8463	0.458467	0	0	0.91
33	0.83229	0	10.5181	0.476035	1	8.66596	1.01
408	2.9034	0	0	0.43458	1	0	3.06
1244	3.02794	3	0	0.470199	0	0	3.5
175	5.99829	0	0	0.455342	0	0	2.99
412	3.8647	0	0	0.439156	0	0	3.98
589	1.57928	0	11.4398	0.486878	1	0	1.41
880	6.46969	6	0	0.441934	0	0	5.97
1096	2.92079	0	0	0.444314	0	0	1.11
523	6.31627	0	0	0.502733	0	0	4.05
163	5.14903	2	0	0.440383	0	10.9902	3.79
430	2.27386	0	0	0.525238	1	0	0.48
1315	5.4715	3	0	0.448846	0	0	5.08
1169	3.73877	0	0	0.520774	0	8.59089	2.73
145	2.35433	2	10.1567	0.468633	0	8.32613	0.5
85	0.893132	0	0	0.473462	1	8.73306	1.34
1210	1.58711	0	0	0.569036	0	8.29288	-0.27
1222	2.2726	0	0	0.485397	1	0	0.31
621	1.78294	0	10.5572	0.467422	1	8.67252	1.1
131	6.8152	0	9.8941	0.427223	0	7.64106	4.4
119	2.97919	0	10.1075	0.46566	1	0	2.35
989	3.91751	0	9.82052	0.439386	0	7.79621	1.08
691	2.06311	0	11.6799	0.513999	0	0	0.02
257	2.72699	0	0	0.461373	1	0	0.64
1119	4.90748	0	0	0.444474	0	0	3.92
462	7.58079	5	11.9729	0.475838	0	0	2.33
146	2.79019	0	10.6124	0.45139	0	8.72638	0.29
26	-0.919308	0	0	0.554011	1	0	0.49
41	6.37045	0	0	0.428913	0	11.0555	3.28
204	3.74549	2	0	0.442741	0	9.5921	1.18
606	1.94472	0	10.8701	0.47411	1	0	-0.05
1333	0.706325	0	0	0.508666	0	8.30458	-0.22
541	4.39281	0	13.0147	0.434205	1	0	0.46
522	5.52487	0	0	0.515165	0	0	2.34
424	2.91154	1	12.1413	0.462148	1	0	0.73
330	2.50245	0	0	0.46446	0	9.70977	0.89
137	2.41	0	11.3721	0.452984	0	10.4317	0.26
1170	2.89445	0	0	0.527006	0	8.51101	2.51
1079	3.90873	4	0	0.464549	0	0	3.69
779	5.84758	0	0	0.448978	0	0	4.05
1208	4.0381	0	10.2249	0.503791	0	8.31115	-0.03
1328	3.94545	1	0	0.446681	0	0	3.63
1321	6.46969	6	0	0.442821	0	0	5.88
1327	4.49449	2	0	0.442617	0	0	4.04
916	6.46969	6	0	0.442821	0	0	5.88
1191	1.74661	0	14.3481	0.433786	0	12.5125	1.75
885	4.0911	4	0	0.427086	0	0	4.57
170	3.73877	0	0	0.447581	0	7.72683	1.36
1124	5.03431	3	0	0.440336	0	0	4.43
1093	5.84758	0	0	0.448246	0	0	4
801	2.2616	0	11.9017	0.448408	0	10.0002	1.89
21	4.27856	0	0	0.443824	1	0	3.23
672	3.02794	4	0	0.4617	0	9.39918	2.92
710	2.8513	0	0	0.491481	0	0	1.13
744	2.94167	0	0	0.473462	0	0	1.17
776	2.94167	0	0	0.473462	0	0	1.17
732	4.17729	0	0	0.439482	0	10.3845	3.16
104	5.65648	0	0	0.434195	0	0	4.37
1000	-0.0621974	0	13.2154	0.429109	1	0	1.43
786	2.60814	0	0	0.484835	0	0	1.02
454	2.74945	0	0	0.534607	0	0	2.98
210	4.51548	0	0	0.445723	0	10.6933	3.02
354	3.58953	0	11.9025	0.439575	0	9.69518	0.46
1307	6.23212	5	0	0.443671	0	0	3.72
183	1.34677	0	10.3861	0.478281	0	8.57	0.29
4	3.60747	0	0	0.453754	0	0	3.62
425	4.83812	0	0	0.435423	1	11.0962	3.2
758	2.19267	0	0	0.466486	0	9.0437	2.18
1228	2.94167	0	0	0.491481	0	0	1.19
128	0.995611	0	9.625	0.490563	0	7.85417	0.03
808	3.65899	2	0	0.496011	0	0	3.83
750	0.64447	0	10.6815	0.450809	1	8.68648	0.6
1259	5.47222	0	13.3095	0.443444	0	0	3.07
716	3.95849	0	0	0.443912	0	0	3.56
340	2.00848	2	12.2459	0.445027	1	0	2.48
493	5.08929	0	0	0.490158	0	9.58318	1.16
2	2.4187	0	0	0.57735	0	0	1.15
1227	4.77042	0	0	0.45216	0	0	3.6
755	1.24635	0	0	0.466486	1	0	1.7
560	-0.702691	0	9.59931	0.554011	1	0	0.36
746	2.46067	1	0	0.466486	0	8.96815	0.56
654	1.86659	1	0	0.472437	1	0	2.33
595	4.91689	0	0	0.46059	0	0	3.76
385	2.2264	0	0	0.5	0	0	0.48
641	3.3926	0	12.2797	0.45981	0	0	0.89
1053	3.084	0	11.3278	0.448431	0	9.22619	0.18
262	1.76878	0	0	0.441834	1	0	0.4
429	3.04513	0	0	0.484835	0	0	1.43
558	0.544104	0	11.9678	0.495465	0	0	-0.4
1233	1.50839	0	10.9786	0.475837	1	0	0
1123	4.97189	4	0	0.42502	0	0	2.72
153	3.48617	2	11.1332	0.443707	0	9.09175	-0.01
1066	4.91689	0	0	0.46059	0	0	3.76
655	3.46153	2	0	0.463427	0	0	3.59
152	2.88672	2	10.3627	0.46446	0	8.49843	0.36
185	3.87919	0	9.9535	0.428571	0	7.66829	2.93
423	4.0444	0	0	0.537656	0	0	3.44
774	3.67745	0	0	0.446681	0	0	3.46
22	8.7512	0	14.0976	0.436819	0	11.4226	-0.17
745	3.16851	0	0	0.480633	0	0	1.5
338	1.00107	0	0	0.478769	1	0	0.23
398	2.50245	0	0	0.412027	0	10.0165	0.83
923	6.46969	6	0	0.443707	0	0	5.77
1252	5.74215	1	0	0.455342	0	0	3.98
1219	2.8932	0	0	0.460266	1	0	0.85
489	3.1183	0	0	0.505515	1	0	2.12
243	1.34752	0	10.0476	0.469838	1	8.7575	1.4
334	6.2379	0	12.4746	0.481675	0	0	1.01
381	3.73756	0	12.6787	0.484171	0	0	0.02
1056	6.65522	0	0	0.450271	0	0	1.93
1188	4.43145	0	0	0.44948	0	0	3.65
1044	6.01037	0	0	0.483249	1	0	2
657	3.60083	2	0	0.463427	0	0	3.62
286	1.36671	0	10.3377	0.443912	1	0	0.33
367	3.25888	0	0	0.478281	0	0	1.55
682	2.24188	0	0	0.538452	1	0	0.53
15	1.40361	0	0	0.48637	1	0	0.24
144	-1.9596	0	10.0518	0.490722	0	8.18621	1.35
951	2.87614	1	0	0.484835	0	0	1.34
148	3.45811	3	10.5673	0.461382	0	8.6434	0.54
701	-0.64254	0	0	0.426777	0	0	4.08
1117	4.64271	2	12.0763	0.451855	0	0	1.89
1192	3.79488	0	0	0.475566	0	0	3.1
441	5.206	0	13.0844	0.444323	1	10.1257	0.29
1204	5.25096	0	0	0.537656	0	0	3.4
1097	4.0359	0	0	0.440562	0	10.0411	2.65
881	4.80425	7	0	0.427142	0	0	3.2
13	-0.381915	0	0	0.551777	1	0	-0.36
577	0.710831	0	11.2079	0.505416	0	0	0
531	-0.21704	0	0	0.52022	1	0	-0.04
847	3.58295	4	11.6688	0.447834	1	0	1.89
931	4.24024	2	12.1702	0.444335	0	0	1.94
1014	4.6675	0	0	0.455481	0	0	3.84
460	4.37507	0	0	0.551777	0	0	3.18
865	6.37229	0	13.2865	0.428665	0	0	1.56
261	1.29399	0	0	0.441834	1	0	0.41
457	5.20834	0	13.1795	0.467273	0	0	2.67
81	1.43628	0	11.1432	0.437439	1	9.06006	0.78
623	-0.472828	0	0	0.5	0	0	-0.28
1314	5.98889	4	0	0.446601	0	0	5.19
1207	5.60448	0	10.9727	0.480709	0	8.9407	0.52
1158	1.8343	0	0	0.446633	0	0	2.56
1157	5.55063	0	0	0.413861	0	0	2.38
487	5.81948	0	0	0.490826	0	9.37441	2.87
1177	3.57518	0	0	0.45357	1	0	3.14
24	2.85898	0	0	0.433291	1	0	2.63
731	4.20449	1	0	0.42721	1	10.6551	2.9
123	0.0867127	0	10.4306	0.458158	0	0	0.61
563	1.35371	0	11.3465	0.518198	0	0	0
309	2.85898	0	0	0.429966	0	0	3.22
29	-0.176295	0	10.3538	0.468357	1	0	0.72
1209	4.56958	0	0	0.48755	0	9.09823	2.75
681	1.57988	0	0	0.473638	1	0	0.74
64	2.78601	0	0	0.452324	1	0	1
1203	4.67845	0	0	0.546024	0	0	3.22
162	1.58711	0	0	0.461633	0	7.47222	0.3
382	-1.13342	0	0	0.483256	0	10.2288	0.6
323	8.41051	0	0	0.439428	0	0	0.64
1074	3.87154	0	0	0.440533	0	0	3.41
53	1.32772	0	13.3642	0.429244	1	9.71627	0.6
1298	6.23212	5	0	0.443671	0	0	5.27
899	6.46969	6	0	0.442821	0	0	5.81
546	1.11683	0	0	0.527006	1	0	0.18
164	3.66236	1	0	0.454429	0	10.0397	1.82
849	3.13271	4	0	0.467151	1	0	1.3
116	1.37983	0	10.944	0.440641	1	0	1.14
536	4.43145	0	0	0.451484	0	0	3.3
172	1.62909	1	0	0.477565	0	9.17565	0.4
269	3.69531	3	10.3475	0.459979	1	0	2.71
107	2.29721	0	11.7573	0.461373	1	0	0.1
222	2.78601	0	0	0.452324	0	9.12609	1.08
1256	3.03979	0	0	0.437351	1	0	2.59
692	1.70074	0	10.3062	0.477565	1	0	0.6
532	0.830573	0	10.8437	0.474504	1	0	1.09
1125	4.49449	2	0	0.445207	0	0	3.79
598	1.98528	0	0	0.455527	1	0	0.08
1105	4.91152	0	12.7701	0.366188	0	0	3.19
305	5.16473	0	0	0.425364	0	0	2.4
667	1.21173	0	0	0.445292	0	0	1.31
90	2.0242	0	0	0.445207	1	0	0.46
1065	5.24411	0	13.8787	0.435977	1	0	0.54
984	5.90332	0	13.6383	0.444314	0	0	2.82
63	4.33433	4	0	0.44568	1	0	3.43
89	2.83546	0	12.2421	0.431494	1	0	2.04
1317	5.4715	3	0	0.447794	0	0	4.58
165	1.39307	0	0	0.53033	0	8.75653	0.17
1152	0.893132	0	0	0.473462	0	8.64556	1.57
266	3.30571	0	0	0.444335	0	9.2963	1.39
1174	3.82653	0	0	0.445052	1	0	3.03
482	4.43145	0	0	0.408248	0	0	3.42
40	0.541578	0	11.4805	0.449215	1	0	-0.02
488	7.37752	0	0	0.519724	0	0	1.15
815	5.62458	0	0	0.44616	0	0	2.62
572	2.80473	0	0	0.460283	1	0	2.63
149	2.94557	0	10.5619	0.454592	0	8.67851	0.34
721	4.36626	3	0	0.460906	0	0	3.87
518	3.30836	0	0	0.492534	0	0	2.92
897	6.46969	6	0	0.442821	0	0	5.54
1278	6.46969	6	0	0.442821	0	0	5.54
729	2.46067	1	0	0.466486	0	8.87886	0.98
290	2.50857	1	10.1429	0.471521	1	0	1.88
133	5.56762	0	9.83008	0.430102	0	7.6174	3.54
540	4.44432	0	12.0727	0.444864	1	9.89579	-0.24
38	1.04388	0	0	0.48637	1	0	-0.04
377	2.59107	0	0	0.494945	0	8.63351	0.86
616	3.79833	0	0	0.452928	1	0	2.74
792	5.47222	0	13.5114	0.445248	0	0	2.9
359	5.03916	1	11.9695	0.428595	0	9.84427	1.57
147	0.0555188	0	12.6179	0.435607	1	9.33227	-0.03
680	3.181	0	12.0659	0.456641	0	9.75336	1.99
5	5.13287	0	0	0.416667	0	0	3.92
1147	5.69101	0	13.5339	0.443341	0	0	3.03
468	9.21074	0	12.1109	0.508802	0	0	1.22
49	3.06497	0	12.8708	0.429974	1	10.3814	2.05
7	4.51338	2	0	0.450809	0	0	3.51
646	2.64996	2	11.3534	0.469394	1	0	1.26
617	3.41876	0	0	0.451718	1	0	1.04
738	4.57165	0	12.2797	0.441069	1	0	0.75
114	2.45517	0	11.2739	0.492418	1	0	0.28
67	2.12714	1	0	0.473462	1	0	0.71
65	2.72867	2	0	0.466486	1	0	1.13
884	4.33433	5	0	0.427106	0	0	4.38
718	6.11699	0	13.7225	0.438644	0	0	2.66
941	0.706325	0	0	0.508666	0	8.36708	0.3
160	1.69999	0	10.2009	0.478281	0	8.38481	0.93
796	1.1843	0	10.6093	0.455987	0	8.64204	-0.17
389	0.0666682	0	0	0.504812	0	8.91901	0.23
1289	5.56588	4	0	0.438359	0	0	4.53
171	2.59107	0	0	0.461849	0	7.66654	0.97
812	2.60411	0	0	0.528547	0	0	1.03
177	-1.24062	0	11.7748	0.476562	1	8.78544	0.2
645	3.95849	0	0	0.424964	0	0	2.88
368	4.13477	0	0	0.468825	0	0	2.14
553	2.58981	0	0	0.47676	1	0	1.04
59	0.481034	0	11.0654	0.428478	1	9.7224	0.46
904	5.98889	4	0	0.446601	0	0	4.84
347	2.80065	0	12.5259	0.467295	0	0	0.95
1007	5.21308	0	13.0297	0.426039	1	0	0.26
458	3.8643	0	12.1738	0.499212	0	10.0185	0.9
115	1.79477	0	12.3131	0.43962	1	0	0.54
88	1.34752	0	10.1031	0.469838	1	0	0.48
386	2.2264	0	0	0.567514	0	0	0.57
501	5.00043	0	12.277	0.488535	0	0	0.88
715	3.38577	0	0	0.447722	0	9.85762	2.38
335	5.65012	0	13.0955	0.466896	0	0	2.63
1080	3.90873	4	0	0.464549	0	0	3.34
93	1.50592	0	0	0.484835	1	0	0.31
575	3.213	2	0	0.467491	1	0	2.82
973	3.08488	0	0	0.463438	1	0	2.5
1331	6.23212	5	0	0.445541	0	0	5.15
515	2.43651	0	12.6464	0.507279	0	0	0.68
650	1.24625	0	11.0266	0.503782	0	0	-0.2
534	2.82061	0	11.8851	0.477505	1	0	0.38
1308	6.23212	5	0	0.444606	0	0	4.18
474	8.27961	0	12.3357	0.472725	0	10.8854	1
18	5.79092	0	0	0.432239	1	0	3.28
832	4.02508	0	12.5793	0.498818	0	0	1.21
915	4.97189	4	0	0.447697	0	0	4.34
1156	1.8859	0	10.1587	0.467422	1	0	0.77
867	6.70203	7	0	0.441214	0	0	5.84
612	2.24188	0	0	0.478769	1	0	0.96
1048	8.00527	0	0	0.464182	1	0	1.8
1031	3.58722	0	0	0.44923	0	10.7174	2.18
315	3.051	0	0	0.433291	1	0	2.5
525	6.82794	5	0	0.473221	0	0	3.55
375	2.37728	0	10.2956	0.481035	0	8.48073	0.54
949	3.41638	1	12.2377	0.431494	0	0	2.39
331	5.27577	0	0	0.447918	0	0	3.81
230	1.43628	0	11.0321	0.437439	0	9.48492	1.11
453	5.42641	0	12.5698	0.484486	0	0	2.34
607	2.64579	2	11.2472	0.464493	1	0	0.74
578	1.65407	0	0	0.513999	0	0	2.22
781	3.66679	0	0	0.456222	0	0	3.27
948	4.94736	2	0	0.452513	0	0	4
754	2.19267	0	0	0.466486	1	0	0.65
1285	5.98889	4	0	0.446601	0	0	3.88
1332	5.98889	4	0	0.446601	0	0	5
223	3.39879	0	0	0.456222	0	9.12276	1.42
1172	2.89131	0	10.2876	0.467422	1	0	2.18
838	2.4187	0	0	0.603553	0	0	0.72
1081	2.73647	3	0	0.464549	0	9.24409	2.41
356	2.50988	0	0	0.469838	1	0	1.03
379	3.23356	0	12.2785	0.49147	0	0	0.49
1039	3.93627	0	11.372	0.465885	1	9.23235	1.03
907	6.46969	6	0	0.443707	0	0	5.43
353	5.03916	1	11.9695	0.427922	0	9.84427	1.67
711	2.35865	0	10.5318	0.458819	1	0	0.81
311	5.16473	0	0	0.424563	0	0	2.54
445	4.52007	0	0	0.520488	0	0	3.32
976	1.42544	0	10.3162	0.459316	1	9.08492	0.47
634	1.85914	0	0	0.491481	1	0	0.66
857	5.54884	4	13.1174	0.413893	1	0	1.51
1199	5.11492	0	0	0.534607	0	0	3.32
405	4.63853	0	11.9487	0.427108	0	9.8341	1.54
255	7.66268	0	0	0.453265	0	0	1.68
1303	4.97189	4	0	0.447697	0	0	4.24
861	3.79041	1	13.0303	0.448346	1	0	1.22
747	3.20967	1	0	0.473462	0	0	1.77
292	1.53007	0	0	0.459492	1	0	2.32
288	3.1101	2	10.2365	0.465991	1	0	2.15
265	1.40104	0	10.3236	0.460906	1	0	0.3
656	3.31979	3	0	0.463427	0	0	3.58
283	4.03996	2	10.4911	0.45045	1	0	3.68
378	2.27386	0	0	0.525238	0	0	0.96
14	2.24381	0	0	0.459879	1	0	2.07
1127	5.00329	0	0	0.440533	0	0	2.58
1134	4.45317	0	0	0.454124	0	0	2.39
836	2.2264	0	0	0.567514	0	0	0.67
1168	4.43145	0	0	0.478769	0	0	3.3
1116	5.21512	5	0	0.424304	0	0	3.58
161	2.30151	1	10.3373	0.471521	0	8.4812	1
896	6.70203	7	0	0.442056	0	0	5.93
1107	4.48234	2	0	0.412881	0	0	4.05
1118	4.46636	2	0	0.453376	0	0	3.97
1029	5.29491	0	0	0.458354	0	0	2.83
238	1.39477	0	10.2195	0.463057	1	8.92289	0.57
158	3.87857	0	12.5805	0.426948	0	0	2.48
659	1.54041	0	11.4588	0.456415	0	0	0.51
1268	1.85914	0	0	0.475566	1	0	0.54
1263	4.58771	0	0	0.430971	0	0	2.41
363	3.38577	0	0	0.464352	0	9.92963	1.54
567	3.78178	0	12.8557	0.460863	0	0	1.45
870	6.46969	6	0	0.442821	0	0	5.44
472	5.14194	0	11.3805	0.493439	1	0	1.46
1017	3.63469	0	0	0.417094	0	10.3725	1.69
1260	4.40658	0	0	0.435297	0	0	3.33
37	1.36109	0	0	0.493805	1	0	0.6
440	-0.129455	0	0	0.53033	0	8.65653	0.81
336	4.17729	0	0	0.480096	0	9.1502	2.51
352	5.71255	0	0	0.44568	0	0	3.91
914	2.80757	1	0	0.486592	0	0	2.23
1288	5.56588	4	0	0.439482	0	0	4.4
1095	-2.81101	0	13.6148	0.426242	1	11.9567	1.59
1021	4.34417	2	0	0.434615	1	0	1.98
1166	3.76645	0	0	0.502194	0	0	3.29
310	3.87598	0	0	0.429966	0	0	3.17
869	6.46969	6	0	0.441934	0	0	5.43
1280	5.98889	4	0	0.447592	0	0	4.71
208	2.72867	2	0	0.468357	0	8.94241	1.08
1089	0.94256	0	0	0.441421	0	0	3.13
105	-0.231308	0	0	0.482308	1	0	0.24
556	3.93232	2	12.2975	0.45361	0	10.9746	2.71
1099	3.26699	0	0	0.433714	0	0	2.98
1019	3.32228	0	13.27	0.452269	1	0	1.41
1322	4.33433	5	0	0.427908	0	0	3.21
490	5.08929	0	0	0.489106	0	9.14874	2.55
974	-1.45757	0	0	0.57735	0	0	-1
633	2.19267	0	0	0.480633	1	0	0.86
751	1.85914	0	0	0.473462	1	0	0.61
387	1.92467	0	0	0.478281	1	0	0.73
1159	4.75956	0	0	0.441638	0	0	3.51
1034	5.81993	1	13.7458	0.454521	1	0	1.81
714	2.50988	0	0	0.460906	0	9.33074	0.9
235	3.6439	0	0	0.441143	0	9.51289	1.6
805	3.60528	2	12.75	0.447724	1	0	0.24
192	1.43531	0	10.5622	0.461419	0	8.59897	0.1
434	2.81326	0	0	0.476035	0	9.01115	1.35
581	4.41731	2	0	0.454698	0	0	4.16
245	5.25474	0	0	0.438217	0	9.84985	2.43
1003	3.87636	2	10.5433	0.448293	1	0	2.46
42	0.42508	0	10.6106	0.460517	1	0	0.52
686	2.49194	0	0	0.457516	0	9.61054	1.29
537	0.706325	0	0	0.549438	0	8.45722	0.29
788	1.92467	0	0	0.482504	1	0	0.57
905	4.94736	2	0	0.45139	0	0	3.9
1186	3.07107	0	0	0.455662	0	0	2.87
723	2.46067	1	0	0.466486	0	8.98506	1.18
399	3.37445	0	0	0.420093	0	0	2.97
604	3.45063	1	12.3587	0.447308	1	0	1.14
985	2.65486	0	10.5465	0.451456	1	9.22943	1.76
1212	4.12807	0	0	0.446633	0	0	2.91
281	3.1101	2	10.2111	0.46446	1	0	2.06
404	1.31828	0	0	0.437096	1	9.54042	0.26
187	3.362	0	12.14	0.42687	0	9.85138	0.44
98	0.667419	0	0	0.484835	1	0	1.04
866	6.92954	8	0	0.440562	0	0	5.29
545	4.08461	0	12.5267	0.437785	1	10.169	0.28
1149	-1.05324	0	0	0.638071	0	7.625	-0.5
627	-0.755459	0	10.8188	0.506893	0	0	0.2
622	2.19267	0	0	0.478281	1	0	0.99
1253	5.86716	1	12.087	0.435969	0	0	3.48
803	3.29086	0	0	0.464286	0	0	2.66
95	3.12698	0	0	0.455501	1	0	1.42
811	5.85389	2	0	0.451336	0	0	4.51
521	2.12886	0	11.2408	0.534229	0	0	1.55
27	0.226267	0	10.7942	0.468825	1	8.71588	0.54
294	3.58257	0	0	0.437215	1	0	2.56
638	1.00952	0	11.305	0.460569	0	8.91484	-0.02
635	2.19267	0	0	0.482504	1	0	0.86
1076	1.86659	1	0	0.471385	1	0	2.33
1274	4.11131	2	0	0.412321	0	0	3.81
602	3.4719	0	0	0.488054	0	0	2.69
903	6.23212	5	0	0.444606	0	0	5.2
789	3.20967	1	0	0.475566	0	0	1.87
1181	4.21716	1	12.6229	0.440456	1	0	3.29
687	4.26825	0	0	0.452365	0	0	2.8
270	3.99869	4	10.3982	0.457482	1	0	1.87
274	3.1101	2	10.2365	0.46446	1	0	2.04
427	3.85373	0	0	0.469621	0	0	3.18
233	1.15599	0	0	0.480633	1	8.74278	0.91
272	2.9981	2	10.8092	0.463997	1	0	1.63
978	8.62394	0	0	0.436872	1	0	1.64
372	1.7081	0	10.8844	0.462929	1	0	0.14
1092	1.30667	0	12.6572	0.426156	1	10.1875	1.28
436	3.92115	0	0	0.474173	0	10.1919	2.54
835	2.60411	0	0	0.561612	0	0	1.02
157	1.63471	0	10.3531	0.467422	1	8.46844	0.85
417	4.10664	0	11.9732	0.41521	0	0	2.9
358	4.54817	0	11.9286	0.42864	0	9.81575	2.26
673	3.90873	4	0	0.464549	0	0	3.35
439	1.79798	0	11.7068	0.463234	1	0	0.51
287	2.50857	1	10.1001	0.469838	1	0	1.89
804	2.2264	0	0	0.5	0	0	1.03
742	4.6675	0	0	0.453376	0	0	3.29
674	4.62734	0	0	0.467422	0	0	3.66
495	5.76217	0	12.3631	0.468782	0	10.1221	2.01
1094	1.68272	0	0	0.467915	1	0	0.59
764	1.51783	0	10.7206	0.450809	0	8.73293	0.13
601	3.18235	0	11.9527	0.4827	1	0	1.12
156	2.41479	0	10.7257	0.445611	0	8.79299	0.64
697	-3.77117	0	0	0.463388	0	0	1
1146	5.85336	3	0	0.439882	0	11.5687	3.95
841	3.91145	0	0	0.546024	0	0	2.72
579	1.97128	0	0	0.487745	0	0	2.42
784	3.16851	0	0	0.478281	0	0	1.85
906	5.4715	3	0	0.448846	0	0	4.23
91	2.0242	0	0	0.445207	1	0	0.75
875	5.98889	4	0	0.44363	0	0	4.62
1273	3.11545	2	11.316	0.413639	0	0	1.39
289	1.88735	0	10.0065	0.478281	1	0	0.67
1195	4.16757	2	0	0.44279	1	0	2.06
1190	4.13477	0	0	0.445207	0	0	3.12
3	2.2264	0	0	0.638071	0	0	0.59
1100	2.8421	1	10.3209	0.46446	1	0	1.92
798	0.845922	0	0	0.484835	1	0	0.49
733	2.99597	1	11.635	0.436375	1	10.3349	0.3
1329	3.93036	2	0	0.425717	0	0	3.66
312	4.33157	0	0	0.433291	0	0	3.26
325	4.83249	1	12.9511	0.452299	1	0	2.82
679	3.50844	2	10.7908	0.452726	1	0	3.59
762	1.70074	0	10.2684	0.46446	1	8.88194	1
68	2.72867	2	0	0.466486	1	0	1.4
943	5.98889	4	0	0.447592	0	0	3.85
16	1.40361	0	0	0.48637	1	0	0.57
957	1.11392	0	0	0.484835	1	0	1.28
47	2.01599	1	10.3931	0.459316	1	0	1.04
1232	-0.462878	0	11.3375	0.50179	1	0	0.3
693	-0.266099	0	11.4148	0.471385	1	0	0.66
1075	2.10932	0	0	0.46006	0	0	1.46
416	1.04621	0	10.7514	0.463057	0	8.81199	0.38
220	2.29613	0	0	0.473462	0	8.73583	1.17
1161	5.91992	0	0	0.419192	0	0	2.8
611	-0.0808276	0	0	0.554011	0	0	0.25
1325	4.97189	4	0	0.42502	0	0	3.41
730	1.70074	0	10.257	0.46446	1	8.89668	1.23
318	4.33896	0	0	0.465783	0	0	3.42
394	4.91689	0	0	0.452846	0	0	3.44
918	5.98889	4	0	0.445611	0	0	4.64
586	1.68033	0	10.6814	0.478427	1	0	1.48
749	2.19267	0	0	0.466486	1	0	0.82
1247	1.90823	0	12.444	0.457471	1	0	0.11
508	2.01366	0	0	0.53146	1	8.79367	1.14
644	1.90945	0	0	0.486727	1	0	0.28
740	4.58771	0	0	0.432951	0	0	2.56
831	2.95734	0	0	0.561612	0	0	1.11
31	3.2965	0	0	0.445277	0	10.3984	1.52
284	2.62463	0	0	0.461419	0	8.7874	1.18
273	3.1101	2	10.1936	0.462929	1	0	2.23
647	2.0905	1	11.2852	0.473588	1	0	1.28
970	6.62649	0	0	0.426052	1	0	1.42
1304	3.77001	1	0	0.446478	1	10.6185	1.91
473	8.66222	0	11.9416	0.507899	1	0	1.48
511	4.0913	0	12.2432	0.467481	0	0	1.31
678	2.43309	2	0	0.467915	0	9.1477	2.03
760	3.10473	0	0	0.450809	0	9.57058	2.08
555	4.21861	1	12.3746	0.451056	1	0	2.48
922	6.92954	8	0	0.441363	0	0	5.92
1165	5.27577	0	0	0.449121	0	0	3.58
48	0.217249	0	12.4513	0.433711	1	11.2009	1.04
785	3.67745	0	0	0.448084	0	0	2.79
1129	3.55029	0	10.4027	0.458132	0	0	1.72
725	1.42099	0	12.8656	0.428323	1	9.79615	0.2
821	7.88853	4	0	0.399563	0	0	1.98
1323	3.04957	2	0	0.428908	0	0	2.82
637	1.05154	0	10.8647	0.452802	1	0	0.19
844	2.35767	0	11.6473	0.513999	0	0	0.12
357	4.13477	0	0	0.467422	0	0	3.26
1113	5.45269	6	0	0.424457	0	0	3.9
11	6.08554	0	0	0.44616	0	0	3.66
587	2.826	0	0	0.442116	1	0	1.84
176	0.765342	0	12.7757	0.441076	1	10.3176	0.1
1085	2.16476	2	12.8331	0.451264	1	0	0.49
600	3.56226	0	0	0.48637	0	0	2.77
1	3.5898	0	0	0.478281	0	0	2.19
1061	3.76438	0	0	0.471992	0	0	2.69
1311	5.4715	3	0	0.448846	0	0	4.37
689	1.70074	0	10.2191	0.476035	1	0	0.76
154	2.30151	1	10.2691	0.469838	0	8.43262	1.08
969	4.11587	0	0	0.418284	0	0	3.48
1316	5.98889	4	0	0.445611	0	0	4.6
1270	5.93369	2	0	0.451336	0	0	4.48
994	3.08609	0	11.8569	0.432085	1	10.8975	0.4
704	5.8711	0	0	0.455342	0	0	2.38
858	4.63426	4	0	0.460906	0	0	3.24
618	3.41876	0	12.3814	0.451718	1	0	1.56
151	2.72037	0	10.7054	0.445436	0	9.39811	0.46
1082	3.61726	3	0	0.467915	0	0	3.09
321	1.50078	0	0	0.446633	1	0	0.76
873	3.57371	3	0	0.429721	0	0	2.82
215	2.72867	2	0	0.466486	0	8.8837	1.2
908	4.20292	0	0	0.53033	0	0	2.4
6	4.51338	2	0	0.450809	0	0	3.18
1128	3.81005	1	10.6203	0.453859	0	0	1.87
303	2.85898	0	0	0.429966	1	0	2.19
876	4.94736	2	0	0.450268	0	0	3.75
10	3.37014	0	0	0.460517	0	0	1.67
993	-1.72444	0	0	0.53033	0	8.55826	1.97
401	2.79392	0	0	0.408637	0	10.2795	1.48
1318	5.98889	4	0	0.446601	0	0	4.58
688	1.70074	0	10.1653	0.476035	1	0	1.08
557	1.63509	0	12.0706	0.476789	0	0	1.56
768	2.24057	0	10.1178	0.469838	1	0	0.88
212	3.46717	2	0	0.460906	0	8.98731	2.22
1137	2.89224	0	12.1013	0.43265	0	0	2
676	2.73647	3	0	0.464549	0	9.30279	2.13
1114	5.45269	6	0	0.424457	0	0	3.94
278	2.50712	1	10.2951	0.463057	1	0	1.13
883	4.5719	6	0	0.427125	0	0	3.58
910	6.70203	7	0	0.442056	0	0	5.7
351	7.15253	0	0	0.441934	0	0	4.66
1164	5.00396	0	0	0.467422	0	0	3.5
304	5.55063	0	0	0.413159	0	0	2.83
406	4.63853	0	11.9548	0.427108	0	9.84018	1.8
36	-0.916608	0	0	0.569036	0	8.18957	0.32
1073	-0.00324318	0	11.0145	0.47707	1	0	0.77
712	4.58771	0	0	0.432951	0	0	3.19
127	0.787476	0	10.105	0.496011	0	8.26109	0.62
395	4.11458	0	12.667	0.444125	1	0	2.35
932	6.23212	5	0	0.444606	0	0	5.04
393	6.46969	0	0	0.445611	0	0	4.97
349	4.17913	0	12.1632	0.448745	1	0	1.31
1291	3.04957	2	0	0.429844	0	0	2.88
102	-0.0983703	0	0	0.482308	1	0	0.06
35	-0.937286	0	0	0.546024	0	0	0.2
939	4.0911	4	0	0.427928	0	0	3.3
720	5.15237	0	0	0.434714	0	10.8179	2.36
685	2.74979	0	0	0.461844	1	0	1.88
362	4.99941	0	0	0.447592	0	0	3.45
1045	5.58191	0	0	0.472676	0	0	2.96
930	6.16603	2	0	0.443801	0	0	4.57
364	3.56226	0	0	0.469838	0	0	2.73
771	3.7399	1	0	0.469838	0	0	2.88
1245	2.43309	2	0	0.467915	0	9.2064	1.74
739	1.75564	0	12.2166	0.430165	1	9.87698	0.5
605	-0.472828	0	0	0.5	0	0	0.21
828	1.05973	0	10.5557	0.471049	1	0	0.36
719	3.38599	0	0	0.488054	0	0	2.54
594	3.56226	0	0	0.48637	0	0	2.71
695	2.12714	0	0	0.480633	0	8.84293	0.9
1292	4.97189	4	0	0.425907	0	0	3.11
1043	9.19145	0	12.8238	0.45894	0	10.5558	1.49
126	-0.305631	0	10.196	0.473462	1	0	-0.2
1201	5.66777	0	0	0.498448	0	0	3.34
1178	5.20677	0	0	0.46259	0	0	3.18
339	3.74488	0	0	0.453376	0	0	2.9
1271	6.29651	0	0	0.364641	0	0	4.55
345	2.03306	0	11.3112	0.476746	0	0	-0.21
782	2.24057	0	10.1587	0.469838	1	0	0.92
580	3.56226	0	0	0.451484	0	0	2.5
1071	3.40963	1	11.2849	0.450066	1	0	1.23
1221	2.52724	0	0	0.480588	1	0	1.2
44	3.61726	4	0	0.457871	1	0	2.78
76	1.34752	0	10.077	0.469838	1	0	0.6
1022	6.46969	0	0	0.447592	0	0	4.97
807	1.67196	0	0	0.57735	0	0	1.03
476	3.87598	0	0	0.424964	0	0	2.57
1309	6.23212	5	0	0.443671	0	0	4.86
118	3.72899	0	12.7153	0.42482	0	0	1.63
960	2.02624	0	0	0.5	0	0	1.32
428	0.586172	0	0	0.561612	1	7.92273	0.62
258	1.94171	0	0	0.465279	1	0	1.12
574	2.22287	0	10.5042	0.472453	1	0	1.99
1024	4.33896	0	0	0.50525	0	0	3.25
322	3.39898	0	12.4801	0.443288	0	0	2.26
1126	3.08777	1	12.6112	0.445498	1	0	0.6
1028	5.2311	0	0	0.462779	0	0	2.89
722	2.46067	1	0	0.466486	1	0	1.21
1016	2.88847	0	12.1263	0.476294	0	0	2.23
231	2.51419	0	0	0.450268	0	9.10769	1.52
140	0.729	0	10.6059	0.468825	0	8.69421	0.3
248	1.50592	0	0	0.484835	0	8.63222	1.24
491	7.14708	0	0	0.491649	0	10.2638	2.29
1264	5.00279	0	0	0.417167	0	0	2.73
1035	5.44779	0	12.2695	0.46055	0	10.8135	1.76
1070	1.851	0	11.0789	0.465725	1	0	1.42
845	3.25888	0	0	0.492428	0	0	1.86
184	0.976001	0	9.97421	0.467456	0	8.09394	0.08
169	5.67151	0	0	0.435614	0	7.78143	3.36
189	3.90472	0	12.7334	0.433683	1	10.312	1.12
419	3.47734	0	0	0.484835	0	0	2.3
343	1.82537	0	11.956	0.467422	0	0	1.57
1216	3.2861	0	0	0.449231	1	0	1.9
793	3.93036	0	0	0.454429	0	0	2.52
1305	4.97189	4	0	0.447697	0	0	4.14
675	2.6464	0	0	0.491481	0	0	2.24
519	1.82152	0	11.3651	0.462243	0	0	2.5
791	5.02173	0	13.207	0.447907	0	0	2.52
483	4.97823	0	11.9308	0.460065	0	9.68634	0.84
1279	6.46969	6	0	0.441934	0	0	5.31
1324	3.93036	2	0	0.426707	0	0	3.01
1217	3.77418	1	0	0.454751	1	0	2.59
1313	6.46969	6	0	0.443707	0	0	4.88
554	3.12411	0	0	0.5	0	0	1.94
843	1.58711	0	0	0.569036	0	0	0.66
955	3.47767	2	0	0.475566	0	0	2.43
972	2.01995	0	0	0.431559	1	0	1.71
411	4.11587	0	0	0.420949	0	9.87868	2.76
409	1.25286	0	10.9613	0.43465	0	8.98185	0.74
961	2.95734	0	0	0.464286	0	0	1.56
1302	5.21512	5	0	0.445749	0	0	4.08
277	3.69531	3	10.3047	0.461382	1	0	2.19
677	3.61726	3	0	0.467915	0	0	2.78
400	3.83364	0	12.6404	0.423308	0	0	2.5
219	3.9146	0	12.2075	0.442599	1	9.99613	0.77
1197	5.39596	0	0	0.5149	0	0	3.18
1038	6.17499	0	0	0.451839	0	0	2.85
999	2.9178	0	12.0158	0.441585	0	9.77721	1.3
670	3.61726	3	0	0.467915	0	0	2.84
783	3.10473	0	0	0.452212	0	9.73317	1.92
856	5.56588	4	0	0.441727	0	0	3.7
797	2.24057	0	10.2273	0.471521	1	0	1.33
1283	6.23212	5	0	0.443671	0	0	4.81
486	5.14463	0	10.9434	0.478956	0	8.91669	1.44
217	0.941213	0	12.4475	0.427235	1	10.0125	-0.23
54	3.31388	3	0	0.460906	1	0	2.36
668	0.14193	0	11.0718	0.500611	0	0	1.03
1015	4.00234	0	0	0.446861	0	0	3.13
193	0.829628	0	10.5406	0.454592	1	8.54483	0.7
120	3.22262	0	10.7819	0.463438	1	0	1.48
1294	6.23212	5	0	0.443671	0	0	4.58
917	5.98889	4	0	0.445611	0	0	4.63
390	-0.129455	0	0	0.515737	0	8.65862	0.49
824	4.09196	0	0	0.455342	0	0	2.92
332	4.20286	0	0	0.488072	0	0	2.78
819	5.36121	2	0	0.394082	0	0	3.86
1120	4.5719	6	0	0.427891	0	0	4
181	2.19267	1	0	0.480633	0	8.6034	1.3
662	2.18749	1	10.5479	0.465578	1	0	1.55
214	2.72867	2	0	0.464616	0	8.825	1.91
799	0.845922	0	0	0.484835	1	0	0.97
1151	3.61726	4	0	0.457871	0	9.0459	2.15
770	1.70074	0	10.1589	0.46446	1	9.04454	0.84
329	4.63853	0	11.942	0.42864	0	9.82913	1.91
1004	3.91017	0	0	0.424563	1	0	2.02
512	2.27386	0	0	0.551777	0	0	1.89
1040	2.38034	0	0	0.424964	0	0	2.29
591	6.12379	0	0	0.4617	0	0	2.52
360	5.84324	0	0	0.448846	0	0	3.87
1234	1.76612	0	12.2957	0.457708	1	0	0.2
1086	0.867884	0	12.4604	0.452901	1	9.02045	1
632	1.46573	0	10.3801	0.476035	1	8.528	0.06
280	3.5806	1	10.2422	0.451456	1	0	1.96
66	3.31388	3	0	0.46259	1	0	2
1051	4.75577	0	0	0.513999	0	0	3.3
597	6.29651	0	0	0.467422	0	0	3.64
968	5.27548	0	0	0.431818	0	0	3.5
513	1.86688	0	13.1142	0.436241	1	10.8663	0.62
890	4.97189	4	0	0.424134	0	0	3.61
218	0.450363	0	11.0071	0.429368	0	9.46653	0.11
365	4.13477	0	0	0.467422	0	0	3.1
174	-0.937286	0	0	0.538452	0	8.485	0.1
992	3.04157	0	0	0.454044	0	7.89426	1.57
1087	2.77788	0	0	0.467915	0	9.2046	1.16
1106	4.11131	4	0	0.416991	0	0	3.81
466	4.14779	0	0	0.460678	0	0	2.97
826	5.46867	2	0	0.405697	0	0	4.29
707	5.20677	5	0	0.455342	0	0	3.83
840	0.513817	0	10.6346	0.456633	1	8.64664	0.1
569	3.0672	0	11.0978	0.46708	1	0	2.42
324	3.0384	0	0	0.517985	0	0	2.42
1167	5.00396	0	0	0.466019	0	0	3.37
263	7.39351	0	0	0.44125	0	0	1.17
829	2.0814	1	0	0.567514	0	0	1.2
333	6.13553	0	0	0.444838	0	0	3.14
301	7.34672	0	0	0.443596	0	0	4.26
503	4.98867	0	0	0.509578	0	11.0481	1.59
46	1.00397	2	11.3717	0.432776	1	9.1998	0.2
895	4.63426	4	0	0.46259	0	0	3.7
1058	2.70588	0	12.0457	0.479005	0	0	1.28
1246	4.0911	3	0	0.45245	0	0	3.5
203	3.61726	4	0	0.457871	0	9.1046	1.98
1180	3.17473	1	10.6946	0.446549	1	8.75021	0.94
909	0.995611	0	10.0208	0.490563	0	8.25	0.11
234	4.3119	0	0	0.44845	0	0	2.72
698	1.39307	0	0	0.451184	0	0	3.73
229	2.55065	0	13.1754	0.432153	1	10.2137	1.29
282	4.2961	3	10.5241	0.448462	1	0	3.31
963	0.731172	0	0	0.512132	0	7.90278	0.58
925	3.92115	0	0	0.447075	0	9.25497	2.44
112	2.3104	0	10.8324	0.456222	1	0	1.3
599	3.39777	0	12.3694	0.435977	0	0	1.61
790	1.85914	0	0	0.475566	0	8.91926	1.03
1176	-1.92957	0	14.4772	0.433052	1	11.5241	0.48
300	5.16473	0	0	0.447474	0	0	3.29
823	4.75629	0	0	0.455342	0	0	2.49
241	2.12714	1	0	0.473462	0	8.72861	1.12
396	3.90694	0	12.6114	0.444125	1	0	2.61
1122	5.21512	5	0	0.425145	0	0	3.57
1266	5.47222	0	13.3886	0.443444	0	0	2.31
499	4.83315	0	0	0.48838	0	9.12537	2.16
988	3.02553	0	11.1682	0.403001	0	9.20746	1.72
58	-1.53905	0	12.7925	0.422482	1	10.1455	0.31
864	4.7225	3	0	0.450865	0	0	3.64
134	2.81326	0	0	0.454456	0	9.0224	1.83
442	0.778917	0	11.9758	0.450457	1	0	0.7
74	2.67862	0	0	0.458959	1	0	1.56
1145	1.34173	1	10.3684	0.46446	1	8.48451	0
839	4.75527	0	12.4992	0.492817	0	0	0.38
23	3.39498	0	0	0.460678	1	0	2.21
190	1.45085	1	10.677	0.451456	1	8.64122	0.48
1237	0.488936	0	11.3496	0.479638	0	9.19577	0.4
276	3.1101	2	10.1683	0.46446	1	0	1.98
43	3.90873	5	0	0.455342	1	0	2.94
320	1.1725	0	0	0.5	0	0	0.86
1250	1.5986	0	11.7172	0.455373	1	0	1.02
211	2.96806	0	12.6199	0.426624	1	10.4567	1.08
919	5.19631	0	0	0.435247	0	10.6988	2.48
1310	4.94736	2	0	0.45139	0	0	3.55
666	1.01988	0	12.0892	0.451049	1	0	0.24
610	-0.272911	0	9.43056	0.567514	0	0	-0.11
237	1.34752	0	10.0361	0.469838	1	8.71585	0.71
603	2.5741	0	10.3862	0.477565	1	0	1.11
451	3.0078	0	12.1861	0.48843	0	9.3639	0.49
226	2.12714	1	0	0.473462	0	8.69802	1.42
1138	2.26481	0	10.7168	0.446681	0	0	1.31
837	1.67196	0	0	0.638071	0	0	0.54
1218	3.62843	2	0	0.472453	0	0	3.01
596	4.41136	0	0	0.459879	0	0	2.95
494	7.22827	0	0	0.514419	1	0	1.93
117	4.17817	0	12.4944	0.421913	0	0	2.12
665	2.18749	1	10.5051	0.465578	1	0	1.89
882	4.5719	6	0	0.427125	0	0	3.77
8	3.94817	1	0	0.454456	0	0	2.34
1090	3.38599	0	0	0.48637	0	0	2.54
509	1.73242	0	11.5959	0.476131	1	0	0.54
1299	5.21512	5	0	0.445749	0	0	3.95
982	4.78938	0	13.1658	0.449396	1	0	1.86
965	1.81696	0	0	0.5	0	0	0.84
816	6.5153	0	0	0.365385	0	0	4.31
191	1.08597	0	12.5744	0.425676	1	9.67699	0.24
259	-0.664911	0	0	0.482308	0	0	0.26
34	-0.916608	0	0	0.569036	0	0	0.34
706	5.20677	4	0	0.455342	0	0	3.61
1013	4.99941	0	0	0.446601	0	0	3.27
1277	6.23212	5	0	0.446477	0	0	4.85
571	2.43334	0	0	0.468316	1	0	1.76
944	4.06288	3	0	0.468357	0	0	3.02
958	4.49534	0	0	0.426894	1	10.3927	2.48
547	2.06711	0	0	0.5	0	0	1.62
205	3.31388	3	0	0.460906	0	9.00821	1.94
527	2.94557	0	10.5263	0.479722	0	8.65178	0.88
700	1.17788	0	0	0.445083	0	0	3.54
926	5.4715	3	0	0.447794	0	0	4.13
1023	2.99758	0	11.9034	0.463371	0	0	2.14
206	0.328611	0	0	0.52022	0	8.43403	0.16
308	4.63853	0	11.9526	0.42864	0	9.83969	2.11
122	4.78938	0	13.0547	0.449396	0	0	2.4
80	0.916615	0	10.9155	0.433884	1	9.6087	0.16
313	3.38599	0	0	0.451484	0	0	2.45
84	0.893132	0	0	0.473462	1	0	0.8
959	2.95734	0	0	0.464286	0	0	1.84
256	2.89224	0	0	0.429658	1	0	1.28
45	3.31388	3	0	0.460906	1	0	2.12
820	5.46867	2	0	0.399984	0	0	4.1
964	2.60411	0	0	0.464286	0	0	1.49
927	4.94736	2	0	0.450268	0	0	3.58
275	3.14014	0	12.4919	0.444797	1	0	1.61
1185	3.37445	0	0	0.420093	0	0	2.61
795	0.778301	0	10.8315	0.455987	1	0	0.21
636	4.98995	0	12.5129	0.432542	0	0	1.97
295	4.75956	0	0	0.417508	0	0	2.87
496	7.35473	0	0	0.488753	0	10.4141	1.7
1084	-2.82205	0	13.0796	0.425382	1	11.6473	0.48
661	1.91949	0	10.6324	0.465578	1	0	1.71
765	3.10473	0	0	0.450809	0	9.62697	1.96
576	0.618267	0	11.2843	0.492606	0	0	0.68
615	1.52199	0	11.3145	0.463206	1	0	0.51
279	2.50857	1	10.0747	0.469838	1	0	1.53
1135	5.79372	0	0	0.442219	0	0	3.14
207	2.57027	2	10.2545	0.459979	1	9.06015	1.32
380	4.51338	0	0	0.466486	0	0	3.45
780	1.85914	0	0	0.473462	0	8.81306	1.23
1111	4.5719	6	0	0.427125	0	0	3.92
251	2.12714	1	0	0.475566	0	8.78731	1.36
924	5.4715	3	0	0.449899	0	0	4.1
506	2.2264	0	0	0.603553	0	0	1.22
1175	4.47982	0	0	0.449929	1	0	2.2
1153	2.46274	0	10.2036	0.451456	1	8.76002	1.1
55	3.61726	4	0	0.457871	1	0	2.45
1249	2.8932	0	0	0.469202	1	0	1.93
813	1.81696	0	0	0.57735	0	0	0.8
842	3.89989	0	0	0.467501	0	0	2.65
950	3.94545	1	0	0.448084	0	0	2.63
224	2.72867	2	0	0.466486	0	8.79441	1.77
228	2.72867	2	0	0.466486	0	8.85312	1.74
967	5.7681	0	0	0.43	0	0	3.59
643	-0.0808276	0	0	0.582843	1	0	0.02
690	2.92845	0	0	0.455001	0	0	2.3
1112	5.45269	6	0	0.424457	0	0	3.98
449	3.00236	0	0	0.465593	1	0	1.83
319	0.155502	0	0	0.5	0	0	0.5
1282	6.23212	5	0	0.444606	0	0	4.81
653	3.05179	2	0	0.463427	0	0	2.5
77	3.58557	2	0	0.445611	1	0	2.26
1033	6.17499	0	0	0.454487	0	0	3.19
130	7.58662	0	9.92418	0.425904	0	7.6515	3.76
200	3.90873	5	0	0.455342	0	9.20099	2.45
543	-0.129455	0	0	0.543258	0	8.47111	0.54
920	5.98889	4	0	0.445611	0	0	4.32
413	1.01722	0	12.1764	0.445861	1	10.3408	0.45
1088	3.38599	0	0	0.48637	0	0	2.48
986	2.27809	0	9.84278	0.442131	0	7.72051	1.48
121	3.22935	0	11.9158	0.437656	1	0	1.79
1320	4.94736	2	0	0.45139	0	0	3.69
966	2.4187	0	0	0.490563	0	0	1.36
314	1.05499	0	0	0.446633	1	0	0.83
1257	3.95849	0	0	0.443912	0	0	2.71
954	4.94736	2	0	0.452513	0	0	3.47
516	3.23356	0	12.171	0.511374	0	0	1.27
201	3.61726	4	0	0.457871	0	9.13519	2.15
397	4.57925	0	12.3932	0.441966	0	0	2.7
415	3.79488	0	0	0.473462	0	0	2.8
912	3.47767	2	0	0.473462	0	0	2.67
850	5.20677	6	0	0.455342	0	0	4.31
199	2.64611	0	0	0.467915	1	9.2231	1.25
830	1.59692	0	0	0.707107	0	0	0.43
640	2.95017	0	11.3823	0.455337	0	0	1.58
97	1.34752	0	10.1473	0.471521	1	0	0.82
703	4.4772	2	12.9153	0.434607	1	0	0.48
1018	3.35788	0	12.0668	0.424535	0	0	2.02
1036	4.03801	2	0	0.454698	1	11.0411	1.61
894	4.06288	3	0	0.466486	0	0	3.09
62	3.84171	2	0	0.447697	1	0	2.39
741	3.25888	0	0	0.466486	0	0	2.19
1251	1.65086	1	11.6681	0.446279	1	0	0.78
299	3.9185	0	0	0.447305	0	9.29297	2.28
1286	6.46969	6	0	0.442821	0	0	5.08
947	5.98889	4	0	0.447592	0	0	4.23
1254	2.23912	0	10.3795	0.464352	1	0	1.34
872	4.0911	4	0	0.427086	0	0	3.36
552	2.2726	0	0	0.48135	1	0	1.11
1062	2.52838	2	12.026	0.444464	1	0	0.98
626	-0.0633885	0	0	0.484835	0	0	1
125	-1.23833	0	10.18	0.464616	1	0	-0.65
937	3.41638	1	12.1949	0.430607	0	0	2.31
92	2.63699	0	0	0.448084	1	0	1.43
825	5.12364	2	0	0.405434	0	0	3.97
298	3.87598	0	0	0.458948	0	0	2.77
1306	4.7225	3	0	0.449875	0	0	3.79
726	3.01927	1	12.1348	0.435921	1	9.37889	1.07
962	2.78344	0	0	0.464286	0	0	1.66
			Test Set
No.	MLOGP	Cl-089	MaxdO	X1A	B03[C-N]	MaxsOH	logBCF
250	3.04965	0	11.7515	0.457109	0	9.50958	2.88
504	4.80124	0	0	0.468097	1	0	3.59
1281	6.46969	6	0	0.441934	0	0	3.36
1242	0.0944188	0	0	0.638071	1	0	1.14
464	6.18748	0	0	0.529587	0	0	1.31
529	4.20695	0	11.1777	0.462106	1	0	3.51
702	1.58619	0	0	0.450268	1	0	0.28
129	8.31971	0	9.9479	0.424877	0	7.65941	2.66
846	1.36388	0	0	0.707107	0	0	1.36
388	0.0666682	0	0	0.492799	1	9.14364	-0.73
724	2.08633	1	10.1998	0.468633	0	8.36921	0.11
952	6.46969	6	0	0.444593	0	0	3.83
639	3.74277	0	0	0.5	0	0	3.92
1163	4.24606	0	13.0106	0.453355	1	0	3.6
293	6.99344	0	0	0.437358	1	0	1.92
497	3.19777	0	0	0.514273	0	0	3.24
505	4.11091	0	12.5835	0.444328	0	0	2.98
1265	2.36899	0	0	0.446681	1	0	0.48
630	2.12219	0	0	0.434343	1	0	0.46
1206	5.41987	0	0	0.525888	0	8.6434	3.04
562	5.00396	0	0	0.5	0	0	3.98
1047	4.02508	0	12.436	0.509578	0	0	2.48
981	6.69104	0	13.2542	0.419281	0	0	0.24
186	2.85293	0	9.85746	0.431818	0	7.62705	2.61
463	4.16517	0	10.2064	0.520774	0	8.41329	2.4
484	5.81948	0	0	0.490826	0	9.20271	3.22
1240	3.27479	0	0	0.433291	0	0	3.62
669	4.18977	5	0	0.4617	0	0	4.16
150	2.88672	2	10.4737	0.465991	0	8.57759	-0.15
71	0.893132	0	0	0.473462	1	8.70111	1.62
956	4.39757	2	0	0.457109	1	0	3.66
216	3.84171	3	0	0.447697	0	9.61955	1.72
1072	2.0762	0	12.4463	0.462767	0	0	0.26
82	2.12714	1	0	0.473462	1	0	0.32
1115	5.45269	6	0	0.424457	0	0	3.2
585	1.57988	0	0	0.48257	1	0	0.52
179	3.34926	3	0	0.467915	0	8.76559	3.09
1141	-0.449631	0	9.55361	0.517985	0	7.81222	1
735	1.74799	0	10.3718	0.459316	1	9.20992	0.16
418	1.54834	0	0	0.473462	1	0	0.2
1032	5.66251	0	12.2703	0.45327	1	10.8338	1.77
1293	4.49449	2	0	0.443912	0	0	4.04
268	3.99869	4	10.4664	0.457482	1	0	3.26
197	4.59434	0	0	0.455342	0	9.51782	0.79
787	2.94167	0	0	0.475566	0	0	1.15
72	4.88734	1	0	0.424606	1	10.9209	3.57
1133	1.2199	0	0	0.441322	1	0	0
660	1.59859	0	11.3824	0.465578	0	0	0.12
727	1.10878	0	0	0.491481	1	0	1.91
1213	1.66121	0	12.305	0.462192	1	0	1.43
316	2.0656	0	0	0.451484	1	0	0.49
584	0.0666682	0	0	0.518665	1	0	0.22
1198	4.05792	0	0	0.534607	0	0	3.43
1139	4.65677	0	9.766	0.433088	0	7.59191	3.4
1215	0.706325	0	0	0.559173	0	8.24059	-0.22
159	1.43124	0	10.6837	0.463151	1	8.67648	0.71
814	2.36899	0	10.5303	0.480699	0	0	0.74
1131	-0.38037	0	9.47222	0.567514	1	0	0.09
73	1.43628	0	11.0729	0.437439	1	9.0093	0.78
1224	2.7229	0	0	0.478544	0	0	1.89
209	1.5426	0	10.3718	0.458819	1	9.12992	0.34
1330	4.94736	2	0	0.450268	0	0	2.63
886	5.68503	7	0	0.424596	0	0	3.54
302	4.75956	0	0	0.418394	0	0	3.55
1046	2.41677	0	14.2685	0.428975	1	10.2038	1.85
371	6.73021	0	14.1792	0.447029	0	0	1.5
810	6.15731	6	0	0.455342	0	0	3.87
1012	3.58953	0	11.6385	0.438773	0	9.47989	0.6
1067	0.821086	0	0	0.47258	1	0	1.71
136	1.47026	0	9.648	0.442879	0	7.60995	0.76
1275	4.48234	0	0	0.407454	0	0	4.05
213	3.31388	3	0	0.460906	0	8.94951	2.73
766	2.23912	0	10.3795	0.463057	1	0	0.43
1142	1.59859	1	11.4858	0.443264	1	8.66191	1.56
19	4.33895	0	0	0.449954	1	0	3.13
628	1.81833	0	10.8705	0.470261	1	0	0.29
510	3.61801	0	11.9447	0.485095	0	0	2.23
447	-0.237104	0	0	0.469416	0	0	0.48
143	-1.35842	0	10.555	0.484278	0	8.61644	1.08
713	1.81116	2	11.6482	0.43487	1	8.96722	1.16
694	-0.317449	0	9.55556	0.57735	0	0	0.35
1030	5.05148	0	0	0.460392	0	0	1.87
1230	-1.59888	0	13.3426	0.422223	1	11.4986	-0.43
929	4.41579	1	0	0.454298	0	0	2.56
28	-2.16966	0	9.65778	0.517985	0	0	1.18
1241	0.906453	0	12.1658	0.454673	1	0	1.54
438	2.39083	0	11.111	0.479005	1	0	0.6
1202	4.52007	0	0	0.551777	0	0	3.15
1160	5.16473	0	0	0.426166	0	0	2.41
1005	4.90748	0	0	0.451472	0	0	3.71
87	2.06125	0	12.2271	0.444335	1	0	0.46
573	2.89055	0	11.9543	0.459853	1	0	0.72
800	1.58194	0	0	0.482308	0	0	0.64
103	4.75577	0	0	0.537656	0	0	2.06
414	2.98569	0	0	0.447697	1	0	1.28
1189	4.12807	0	0	0.464616	0	0	3.34
1214	0.799962	0	0	0.603553	0	8.06625	-0.4
370	4.51338	0	0	0.464616	0	0	3.84
101	-0.0203347	0	0	0.464616	1	0	0.58
945	6.23212	5	0	0.444606	0	0	5.43
911	4.49449	2	0	0.445207	0	0	3.75
227	3.84171	2	0	0.447697	0	9.68321	2.1
435	1.94101	0	0	0.479265	0	9.12512	0.81
1296	4.01324	1	0	0.445475	1	11.1208	2
991	4.13129	0	0	0.443365	0	7.94899	1.76
613	-0.472828	0	0	0.5	0	0	0.02
1297	5.98889	4	0	0.444621	0	0	4.85
743	2.19267	0	0	0.466486	1	0	0.55
778	3.16851	0	0	0.480633	0	0	1.55
1183	4.00417	0	0	0.419324	0	10.9072	2.9
683	3.61726	3	0	0.469446	0	0	3.19
99	-0.144581	0	0	0.484835	1	0	-0.19
822	2.23939	0	11.7796	0.453475	1	0	-0.02
328	4.63853	0	11.9466	0.42864	0	9.83376	1.4
996	3.95611	0	0	0.446755	0	9.36705	1.59
827	2.56534	0	0	0.484835	0	0	2.35
1109	6.20108	0	0	0.44616	0	0	3.14
410	5.2035	0	0	0.450268	0	0	3.99
1025	2.98016	0	13.1972	0.456818	0	9.88117	1.29
469	7.92206	0	12.0266	0.504925	1	0	0.54
620	4.91941	0	0	0.446613	1	0	1.84
86	0.556861	0	0	0.483885	1	8.83937	0.08
57	2.72867	2	0	0.466486	1	0	1.22
1225	1.89005	0	11.2542	0.472453	0	0	1.68
756	2.76363	0	11.5668	0.437261	1	10.3063	0.84
1104	4.58771	0	0	0.431961	0	0	3.48
631	2.10979	0	11.0227	0.47479	1	0	0.68
551	2.58981	0	0	0.472385	1	0	0.9
32	-1.43379	0	0	0.57735	0	0	0.3
1196	4.52007	0	0	0.522592	0	0	3.32
1008	5.7755	0	0	0.444551	0	0	3.76
1059	3.39169	0	0	0.495991	0	0	2.74
252	1.34752	0	10.0673	0.471521	1	8.83926	1.34
1130	5.82448	0	12.2823	0.443646	1	0	2.72
940	3.04957	2	0	0.428908	0	0	2.46
17	1.40361	0	0	0.488054	1	0	0.4
582	3.3105	0	10.6479	0.456757	1	0	2.96
1037	5.51132	0	0	0.463836	0	0	2.07
478	8.2848	0	12.5971	0.492155	0	0	1.17
1200	5.00396	0	0	0.494321	0	0	3.29
763	3.14586	0	0	0.488072	0	0	2.79
79	0.916615	0	10.9269	0.433884	1	9.58989	0.38
1258	3.56226	0	0	0.46259	0	0	2.82
544	4.79686	0	11.6891	0.440013	1	9.50824	0.57
168	-1.9487	0	0	0.504442	0	9.0294	0.31
221	3.04588	0	0	0.466486	0	8.976	1.45
240	2.29613	0	0	0.473462	0	8.78306	1.03
773	2.23912	0	10.3795	0.463057	1	0	0.89
559	0.49124	0	11.8021	0.495465	0	0	1.04
902	5.98889	4	0	0.445611	0	0	4.93
648	0.113479	0	10.6528	0.525997	0	0	-0.26
550	2.19267	0	0	0.492428	1	0	1.01
1020	-0.211828	0	0	0.469671	1	0	1
376	4.64781	0	10.9026	0.458633	0	8.86114	2.15
1144	2.46198	0	10.2969	0.469838	0	8.4604	1.2
1091	2.8421	1	10.3209	0.465991	1	0	1.99
1068	-0.270286	0	10.1415	0.513989	1	0	0.36
96	2.12714	1	0	0.475566	1	0	0.91
772	1.18285	0	10.7615	0.451456	1	8.72567	0.1
549	3.20949	0	0	0.458215	1	0	2.32
1193	2.29751	0	12.4699	0.478528	1	0	0.51
348	4.02957	2	12.0591	0.43875	1	0	2.86
538	3.30324	0	12.5968	0.435867	1	10.1951	0.24
52	2.18607	0	12.5762	0.426295	1	9.21842	0.17
244	1.27424	1	12.4107	0.43502	1	9.97285	0.39
928	5.4715	3	0	0.447794	0	0	4.33
1154	0.575037	0	9.83158	0.493828	1	0	0.97
306	4.33157	0	0	0.434343	0	0	3.3
1319	5.4715	3	0	0.448846	0	0	4.47
901	5.98889	4	0	0.445611	0	0	4.64
1011	5.52595	2	12.0104	0.427906	0	9.8728	2.18
1301	4.97189	4	0	0.447697	0	0	4.11
1006	4.54553	0	0	0.437987	0	9.61312	2.12
980	0.522546	0	11.0141	0.436017	1	0	0.77
195	5.31789	0	0	0.452324	0	0	3.58
891	3.13932	2	0	0.460135	1	0	1.8
198	3.76438	0	0	0.460906	0	9.21616	2.71
1108	2.86117	0	10.9623	0.457836	0	0	2.28
1262	5.84758	0	0	0.41306	0	0	3.17
75	0.291249	0	10.4589	0.454456	1	8.51128	0.04
1300	5.21512	5	0	0.445749	0	0	4.21
524	3.77667	0	0	0.438422	1	0	2.5
1187	4.81711	0	11.7887	0.428511	0	0	2.78
888	4.85571	1	0	0.432951	0	0	3.5
753	1.97394	0	0	0.567514	0	0	1.12
1143	2.75841	2	10.9632	0.443264	1	8.97554	-0.1
1248	2.58512	0	12.2201	0.43579	1	0	0.18
167	-1.315	0	0	0.53033	0	8.49653	-0.04
818	4.45167	2	0	0.381553	0	0	3.95
426	4.42668	0	0	0.455432	0	10.0401	2.63
1229	2.14648	0	12.1003	0.445034	1	9.34343	0.2
913	3.98753	3	11.7317	0.452086	1	0	1.98
684	1.18108	0	10.3599	0.470589	1	0	0.82
658	2.49233	0	0	0.471385	0	0	2.24
608	0.453865	0	0	0.495206	0	0	0.53
1102	2.58027	0	0	0.435376	0	10.471	1.23
1026	5.14829	0	0	0.440533	0	0	3.41
936	5.4715	3	0	0.448846	0	0	4.36
1276	1.91565	0	13.4745	0.422698	0	11.4174	1.3
995	0.916987	0	10.5273	0.460517	0	8.60009	1.42
979	2.62193	0	12.4589	0.41766	1	0	1.08
355	2.81326	0	0	0.46446	0	9.46176	1.48
862	6.92954	8	0	0.440562	0	0	5.82
225	1.94034	0	0	0.464286	0	8.95833	0.26
437	2.81326	0	0	0.477565	0	9.41204	1.49
1050	6.29651	0	0	0.464616	0	0	4.26
443	2.28866	0	10.3071	0.476629	0	8.49691	0.88
459	4.27447	0	11.9133	0.499251	0	9.76522	0.62
461	5.39596	0	0	0.537656	0	0	2.38
1238	2.35767	0	11.373	0.479096	0	0	0.93
342	5.20677	0	0	0.460906	0	0	3.66
78	2.32446	0	12.198	0.430607	1	0	1.57
232	3.12698	0	0	0.454298	0	9.10357	1.66
664	1.60228	0	10.4115	0.469009	1	0	1.93
625	1.19511	0	0	0.484835	1	0	0.5
593	4.8371	0	0	0.438788	0	0	2.67
239	0.450363	0	11.2348	0.429368	0	9.3055	0
139	0.632267	0	10.572	0.468825	0	8.66032	0.3
1267	4.58771	0	0	0.432951	0	0	3.18
1261	4.23031	0	0	0.440336	0	0	3
1064	3.4719	0	0	0.48637	0	0	2.69
1326	4.85571	1	0	0.431961	0	0	3.63
166	2.81326	0	0	0.455987	0	9.44613	1.94
100	-0.144581	0	0	0.484835	1	0	0.65
1049	4.23281	0	14.8176	0.44655	1	0	1.11
507	3.46696	0	0	0.528839	1	0	1.33
194	4.95173	0	0	0.44616	0	11.5642	2.82
900	6.23212	5	0	0.443671	0	0	5.01
12	3.96135	0	11.2201	0.441244	0	10.1042	0.98
492	3.26699	0	0	0.412457	0	0	2.34
542	2.81326	0	0	0.48914	1	0	2.01
188	3.30543	4	12.4146	0.440118	1	9.44967	1.87
1295	6.23212	5	0	0.444606	0	0	4.78
1173	4.33896	0	0	0.463723	0	0	3.29
946	0.799962	0	0	0.5	0	8.52083	0.54
30	2.70709	4	11.0769	0.455342	1	8.88256	0.49
971	3.94817	1	0	0.454456	0	0	2.21
717	3.25888	0	0	0.464616	0	0	2.43
307	4.68413	0	0	0.419192	1	0	2.03
775	2.41951	0	0	0.469838	0	8.90878	1.28
1077	1.60373	0	0	0.476894	0	0	1.89
421	2.96361	0	0	0.439818	0	0	2.13
1194	4.59645	2	0	0.458037	1	0	1.97
1255	5.62458	0	0	0.42482	0	0	2.91
124	3.92115	0	0	0.441402	0	9.83631	2.45
182	0.961714	0	9.83002	0.484254	1	8.83685	0.44
242	2.72867	2	0	0.468357	0	8.8837	1.31
502	2.96361	0	0	0.446633	0	0	2.49
809	2.45911	0	0	0.528547	0	0	1.74
392	6.72544	0	0	0.443394	0	11.0957	2.42
877	7.15253	9	0	0.439969	0	0	5.71
373	5.39596	0	0	0.463723	0	0	3.1
748	3.79488	2	0	0.466486	0	0	2.95
1009	4.17729	0	0	0.467879	0	9.23929	2.19
699	1.17788	0	0	0.445083	0	0	3.44
889	5.21512	5	0	0.424304	0	0	4.08
736	3.04957	0	0	0.445611	1	0	1.63
752	3.3218	0	0	0.492428	0	0	2.26
561	0.799962	0	0	0.603553	0	0	0.6
871	5.4715	3	0	0.448846	0	0	3.88
588	0.314325	0	0	0.438832	0	0	0.85
391	4.91689	0	0	0.451855	0	0	2.92
671	3.61726	3	0	0.469446	0	0	2.53
517	2.04046	0	11.0746	0.51011	0	9.07882	0.59
1078	4.53966	2	0	0.450445	0	0	3.78
874	4.06288	3	0	0.464616	0	0	3.27
271	3.69531	3	10.3047	0.459979	1	0	1.83
69	1.96874	1	10.2409	0.46446	1	0	1.03
1312	6.70203	7	0	0.442056	0	0	5.26
369	3.29086	0	0	0.528547	0	0	0.74
1269	2.95734	0	0	0.490563	0	0	1.81
56	3.31388	3	0	0.460906	1	0	2.33
860	6.92954	8	0	0.440562	0	0	5.88
868	6.70203	7	0	0.441214	0	0	5.12
794	3.2452	2	12.5856	0.4493	1	0	0.62
863	4.63426	4	0	0.460906	0	0	3.69
833	2.95734	0	0	0.52022	0	0	1.6
629	2.22241	0	11.0916	0.456804	1	0	1.09
350	0.728309	0	9.50463	0.528547	0	0	0.86
663	1.2952	0	0	0.475431	1	0	1.56
267	4.29016	5	10.5346	0.455342	1	0	2.48
859	4.92573	5	0	0.457871	0	0	3.8
456	3.39436	0	0	0.465593	0	0	2.5
1284	5.4715	3	0	0.448846	0	0	3.93
878	6.92954	8	0	0.440562	0	0	5.46
106	3.39498	0	0	0.460678	0	0	2.54
1103	2.8421	1	10.2114	0.46446	1	0	1.69
247	1.96381	0	0	0.448084	1	9.3087	1.12
264	4.46354	0	0	0.454171	0	8.98166	2.17
938	0.799962	0	0	0.5	0	0	0.66
777	3.25888	0	0	0.468357	0	0	2.31
9	4.38973	0	0	0.443596	0	0	2.51
921	5.98889	4	0	0.446601	0	0	4.54
539	3.30629	0	12.5757	0.4579	1	10.1976	0.2
987	0.0555188	0	12.6067	0.435607	1	9.31491	0.48
455	6.08287	0	13.429	0.499198	0	0	1.04
1184	4.24748	0	0	0.41709	0	0	3.02
448	6.01675	0	13.2141	0.4912	0	0	0.92
614	1.35371	0	12.0903	0.483013	1	0	-0.3
1083	1.9358	0	13.5171	0.424593	0	0	1.41
291	1.8859	0	10.2273	0.468825	1	0	1.02
708	3.79488	2	0	0.468357	0	0	2.84
1148	2.55455	0	12.7199	0.445689	1	10.2895	0.84
652	4.14779	0	0	0.429966	0	0	2.8
898	5.98889	4	0	0.446601	0	0	4.3
942	3.47767	2	0	0.473462	0	0	2.57
337	2.89445	0	0	0.51259	0	0	2.29
1220	2.8932	0	0	0.465125	1	0	1.95
761	1.70074	0	10.2195	0.46446	1	8.9637	0.95
173	5.10547	0	0	0.437432	0	7.98102	2.76
853	4.0911	4	0	0.429611	0	0	3.46
60	0.931482	0	11.4018	0.439248	1	9.24207	0.28
998	3.362	0	11.5403	0.425817	0	9.38334	1
1010	2.51799	0	0	0.467422	1	0	1.78
1290	5.98889	4	0	0.447592	0	0	4.39
470	7.37842	0	11.2989	0.509627	0	8.60382	1.2
935	6.23212	5	0	0.444606	0	0	4.57
934	6.23212	5	0	0.443671	0	0	4.58
565	2.24779	0	12.105	0.481226	0	0	1.24
366	4.23031	0	0	0.449121	0	0	2.88
480	11.2963	0	13.2873	0.497606	0	0	1.38
20	4.27856	0	0	0.442938	1	0	2.37
1150	2.93757	0	0	0.467915	1	9.30185	1.46
485	4.97823	0	11.5941	0.459074	0	9.38877	1.1
249	2.29613	0	0	0.475566	0	8.87238	1.52

## Sheet: PLS q-RASPR Model_Train_Test
			Training Set
ID	RA function(GK)	Abs MaxPos-MaxNeg	Avg.Sim(GK)	gm*SD Similarity	B03[C-N]	logBCF
624	1.47261	0.325658	0.655482	-0.0356132	1	3.47
757	2.15227	0.0470723	0.924142	0	1	0.44
530	1.68371	0.00404246	0.974607	-0.00737712	1	0.09
769	0.737396	0.147328	0.938959	-0.0312575	1	2.45
94	2.80095	0.0628527	0.903935	0.0525506	0	4.14
450	1.65987	0.011843	0.894322	-0.0140537	1	3.15
477	0.819048	0.0621516	0.755193	0.0541742	1	2.85
108	1.64144	0.0605196	0.880429	-0.0217192	1	0.62
1140	0.752821	0.545297	0.468869	-0.191264	1	-0.4
1162	2.08887	0.00194773	0.840506	0.0268204	0	3.55
619	1.75378	0.0101058	0.874177	0.0142461	1	3.16
1155	1.04616	0.047822	0.968352	-0.0124035	1	-0.4
83	2.53853	0.506631	0.390693	0.0735132	1	3.74
138	0.787925	0.327958	0.261923	-0.0748422	0	0.32
180	1.50143	0.0594851	0.913506	-0.0608854	0	0.45
1041	2.19109	0.0209832	0.406441	-0.12772	0	0.78
420	2.0498	0.13017	0.664156	-0.0259215	0	0.04
142	0.602649	0.722969	0.353684	-0.19815	0	1.75
728	3.20451	0.545156	0.852197	0.114663	0	0.79
520	1.84241	0.0162535	0.777072	-0.0179029	0	1.82
1098	2.74442	0.103902	0.776481	0.0625828	0	1.08
1136	2.46199	0.09898	0.78966	0.0284636	0	3.85
109	2.81419	0.038257	0.904227	0.0712672	0	3.94
1205	0.600114	0.699468	0.327019	-0.209023	0	2.85
500	1.91914	0.465852	0.220274	0	1	1
346	1.01287	0.00247669	0.762878	0.0612079	0	-0.68
155	0.658111	0.935776	0.696889	-0.125944	1	0.56
384	0.357192	0.543131	0.781441	-0.166116	0	0.85
990	1.69429	6.69196e-06	2.79323e-06	1.33345e-06	1	2.48
528	0.633196	0.0463351	0.913676	-0.0372574	0	-0.36
327	0.815	0.0431205	0.833641	0.0528565	0	0.1
879	0.215224	0.668961	0.86924	-0.118277	0	2.12
1054	1.02746	0.200865	0.256321	-0.0749241	1	1.78
433	1.12518	0.522145	0.751507	-0.074137	1	0.36
651	0.971021	0.0595592	0.936837	-0.016965	1	0.24
1287	1.46358	0.011991	0.926679	-0.0196138	1	3.09
50	0.384108	0.805085	0.85746	-0.0781082	1	0.9
997	1.12662	0.0409021	0.763181	-0.115663	1	0.52
135	1.82272	0.0213062	0.684713	-0.0291041	0	0.98
132	2.68038	0.507142	0.542169	0	0	4.36
705	2.53725	0.0638024	0.0202063	0.00942367	0	0.46
1226	0.432611	0.279619	0.939887	-0.0327664	1	2.27
383	0.618763	0.0380964	0.815564	-0.0713833	0	0.35
202	2.38565	0.356667	0.114825	0.091355	0	2.07
452	1.97541	0.244383	0.482426	-0.0936853	0	0.27
51	1.04645	0.194849	0.185437	-0.0801267	1	0.27
1239	1.15112	0.150494	0.851442	-0.0408187	0	2.76
61	0.733463	0.463707	0.664969	-0.153824	1	3.68
178	1.5051	0.0709799	0.899079	-0.0619461	0	0.39
609	1.14016	0.255744	0.650356	-0.0705759	0	1.72
893	1.23019	0.00842401	0.571372	-0.0259668	0	0.32
260	0.433874	0.530729	0.0557874	-0.166966	0	1.29
326	0.881878	0.376673	0.730021	-0.0965293	0	-0.1
1236	0.54355	0.533497	0.831859	-0.0595823	1	-1
1002	3.33934	0.0105181	0.975852	0.00816203	0	4.35
592	2.92774	0.179128	0.887982	0.0466474	0	3.51
141	2.55917	0.187685	0.91579	0.0538263	0	3.2
422	0.804675	0.608861	0.639688	-0.0574985	1	1.71
1121	3.72219	0.958765	0.873719	0.118518	0	2.78
759	2.00288	0.181287	0.349039	-0.0353198	1	2.47
296	3.58813	0.282764	0.986405	0.0137744	0	1.84
1055	3.5027	0.0444159	0.902597	0.0372399	0	1.81
403	2.82226	0.0804973	0.978102	0.0176882	0	2.34
548	0.865973	0.0960374	0.966053	-0.0274503	1	0.38
887	3.13636	0.130394	0.93747	0.0299903	0	4.3
590	0.782749	0.826428	0.799519	-0.129927	0	1.69
1001	0.947862	0.0926356	0.953268	-0.02867	1	-0.3
361	3.02992	0.161788	0.983464	0.0119789	0	4.11
806	0.608314	0.205917	0.796589	-0.0804364	1	2.2
933	4.76189	0.907494	0.999495	0.00077588	0	5.81
1101	3.37055	0.102583	0.981642	0.0195927	0	2.08
444	2.5614	0.036573	0.950488	0.010391	0	3.42
39	0.0126309	0.919355	0.363466	-0.37061	0	1.1
535	0.942505	0.414548	0.78666	-0.0928344	0	0.2
431	2.45653	0.165476	0.783056	0.0497834	1	0.93
465	2.97484	0.0412923	0.586401	-0.115611	0	1.64
1057	1.00751	0.00929423	0.916404	-0.0443378	0	2.35
236	0.769241	0.181008	0.851734	-0.0514982	0	-0.18
1069	1.34929	0.128892	0.862534	-0.0326717	1	1.95
767	0.915506	0.0276166	0.843955	0.0874998	1	1.83
642	1.20413	0.0535773	0.799773	0.0557566	0	0.18
649	2.15261	0.154104	0.0621085	-0.0152782	0	1.65
977	0.746214	0.146292	0.890515	-0.0702962	1	-1
852	4.51974	0.707008	0.342157	0.137603	0	2.94
254	3.22612	0.222706	0.97237	0.0179073	0	0.9
479	2.92249	0.299471	0.608599	0.0601692	0	1.54
1235	0.554483	0.0357283	0.922062	-0.0325651	1	-0.1
1060	2.31173	0.340348	0.200283	0.0323194	0	1.85
402	0.679406	0.0982633	0.936186	-0.0301628	1	0
1231	2.40904	0.0460016	0.710876	0.0873694	1	3.26
196	2.87566	0.132435	0.83379	0.0518575	0	3.78
737	0.612416	0.268227	0.808462	-0.086074	1	1.53
285	1.69218	0.0272728	0.878244	-0.00832568	1	0.94
514	3.35197	0.000473933	0.987944	-0.00924329	0	4.17
533	1.35762	0.188563	0.762148	-0.050455	1	2.27
568	1.11317	0.0394469	0.88816	0.0180754	1	2
467	1.29383	0.1464	0.43363	0.147288	0	0.22
246	0.495407	0.319407	0.823792	-0.076547	0	2.32
975	0.334674	0.549299	0.11821	-0.164721	0	0.65
834	0.989035	0.416098	0.88105	-0.0853048	0	0.6
583	0.737991	0.245562	0.630694	-0.0945199	0	0.2
570	0.719404	0.308885	0.973371	-0.0130572	1	2.96
1179	0.642325	0.456799	0.6818	-0.157656	0	0.48
696	0.716593	0.417755	0.3537	-0.12781	1	-0.26
317	1.42632	0.0842599	0.94602	-0.0189712	0	0.64
25	1.56181	0.00666435	0.979331	0.00449922	1	0.8
1171	1.31111	0.0560139	0.907125	0.0223162	0	0.76
1223	0.329297	0.717978	0.257463	-0.192739	0	1.48
70	0.782057	0.210037	0.915901	-0.0452075	1	1.8
983	2.70062	0.0278257	0.493936	-0.108796	0	0.93
1110	3.70149	0.958017	0.872935	0.11903	0	2.96
481	1.14472	0.878076	0.116458	-0.110512	0	0.09
113	1.45488	0.0463883	0.867916	-0.0274465	0	0.6
734	2.85761	0.113275	0.865869	0.0616442	0	0.92
802	2.8551	0.0496428	0.981552	0.0150087	0	3.48
111	1.407	0.0718181	0.65469	0.0941781	1	0.4
407	1.313	0.0860532	0.762525	-0.0536277	0	0.34
110	1.6125	0.0786072	0.883066	-0.0286189	0	0.91
33	0.792599	0.859454	0.828103	-0.0672851	1	1.01
408	2.0775	0.0157101	0.931843	0	1	3.06
1244	2.97592	0.689512	0.795368	0.119175	0	3.5
175	3.28653	0.108806	0.965348	0.0208965	0	2.99
412	3.1536	0.202056	0.957462	0.0229126	0	3.98
589	0.796461	0.00199229	0.888543	-0.0289398	1	1.41
880	5.56794	0.955104	0.999376	0.000623425	0	5.97
1096	2.70203	0.0358107	0.883791	0.0208082	0	1.11
523	2.58596	0.257152	0.607492	0.0656222	0	4.05
163	2.63947	0.0572409	0.337787	0.0568678	0	3.79
430	0.979632	0.182384	0.49866	-0.131085	1	0.48
1315	4.16	0.948669	0.903389	0.124644	0	5.08
1169	1.87073	0.354874	0.383412	0	0	2.73
145	0.752035	0.628759	0.497685	-0.203071	0	0.5
85	0.989453	0.807481	0.223027	-0.236623	1	1.34
1210	0.533221	0.444443	0.224337	-0.135367	0	-0.27
1222	1.01171	0.0448457	0.972641	-0.0107343	1	0.31
621	0.762819	0.808147	0.939311	-0.0657662	1	1.1
131	3.07872	0.631604	0.401799	0	0	4.4
119	1.3083	0.0248961	0.907376	0.0199763	1	2.35
989	0.865396	0.0523127	0.710943	-0.0781538	0	1.08
691	0.321128	0.610695	0.716348	-0.176778	0	0.02
257	1.58425	0.00198568	0.975663	-0.0117143	1	0.64
1119	3.38568	0.0134269	0.980587	0.0106898	0	3.92
462	2.98043	0.054091	0.0128676	-0.0159718	0	2.33
146	0.638659	0.14197	0.895336	-0.0500313	0	0.29
26	-0.0764697	0.920445	0.228359	-0.294656	1	0.49
41	2.84799	0.0874485	0.577204	-0.119326	0	3.28
204	1.96068	0.118488	0.546395	0.0566823	0	1.18
606	0.924221	0.00443666	0.966612	0.00602544	1	-0.05
1333	0.468874	0.744192	0.741873	-0.197792	0	-0.22
541	1.69127	0.039916	0.882507	0.0128751	1	0.46
522	3.14605	0.259931	0.760914	0.0944012	0	2.34
424	1.58802	0.106936	0.829044	-0.0271516	1	0.73
330	1.36341	0.0303597	0.91732	-0.0398468	0	0.89
137	0.673916	0.132316	0.843634	-0.0382839	0	0.26
1170	0.947696	0.238844	0.352222	0.166086	0	2.51
1079	3.24962	0.958328	0.793639	0.132098	0	3.69
779	3.16822	0.106787	0.982139	0.0128505	0	4.05
1208	1.01706	0.105484	0.45805	-0.152155	0	-0.03
1328	3.03415	0.421436	0.762383	0.114101	0	3.63
1321	5.58899	0.957498	0.999773	0.000292799	0	5.88
1327	3.70508	0.750294	0.925112	0.0317249	0	4.04
916	5.58899	0.957498	0.999773	0.000292799	0	5.88
1191	0.878734	0.0522067	0.412208	-0.0501392	0	1.75
885	3.37432	0.980108	0.833521	0.117331	0	4.57
170	1.9019	0.0172758	0.814447	0.0110129	0	1.36
1124	4.18616	0.864005	0.869138	0.085174	0	4.43
1093	3.17382	0.104668	0.983229	0.013504	0	4
801	0.451808	0.18458	0.864965	-0.0453956	0	1.89
21	2.31556	0.159967	0.84454	0.029999	1	3.23
672	2.09146	0.000780879	0.614522	0	0	2.92
710	1.89686	0.0078579	0.955119	-0.00508491	0	1.13
744	1.74132	0.0569719	0.947539	-0.0152803	0	1.17
776	1.74132	0.0569719	0.947539	-0.0152803	0	1.17
732	2.58904	0.0898198	0.890491	0.0356164	0	3.16
104	3.08337	0.139347	0.916335	0.0361924	0	4.37
1000	0.514278	0.225311	0.474834	-0.0631389	1	1.43
786	1.5065	0.000160483	0.929608	-0.0192225	0	1.02
454	1.84105	0.165749	0.729345	-0.0263044	0	2.98
210	3.09455	0.226817	0.882276	0.0570714	0	3.02
354	0.978276	0.0630382	0.812415	-0.0262762	0	0.46
1307	4.971	0.907494	0.999495	0.00077588	0	3.72
183	0.378457	0.2204	0.84588	-0.0526447	0	0.29
4	2.72636	0.0409643	0.975003	0.0143741	0	3.62
425	2.68653	0.404047	0.3611	0.0690491	1	3.2
758	1.07314	0.278644	0.920998	-0.0347586	0	2.18
1228	1.89643	0.0182632	0.959525	-0.00422577	0	1.19
128	0.462528	0.554793	0.772731	-0.167979	0	0.03
808	2.52154	0.166799	0.55629	0.0428938	0	3.83
750	0.382238	0.839867	0.829373	-0.0876419	1	0.6
1259	2.66279	0.146142	0.928959	0.0547616	0	3.07
716	3.23356	0.222591	0.981885	0.0132215	0	3.56
340	1.06894	0.424056	0.659277	-0.128585	1	2.48
493	2.36609	0.307733	0.68244	0.159845	0	1.16
2	0.927033	0.632069	0.845092	-0.0854323	0	1.15
1227	3.32661	0.0531998	0.97835	0.0140563	0	3.6
755	0.960495	0.0077705	0.90528	-0.0367455	1	1.7
560	0.475815	0.118575	0.0486439	-0.038687	1	0.36
746	1.3367	0.2863	0.854394	-0.0717133	0	0.56
654	1.00567	0.0156884	0.777694	0.103073	1	2.33
595	3.25977	0.0628245	0.970595	0.0137415	0	3.76
385	1.44312	0.0789317	0.947636	-0.0188828	0	0.48
641	1.49748	0.033092	0.894652	-0.0258665	0	0.89
1053	0.569159	0.0724371	0.916363	-0.0391513	0	0.18
262	0.533035	0.189019	0.921969	-0.056497	1	0.4
429	1.81116	0.0122648	0.965799	-0.00167252	0	1.43
558	0.460705	0.512805	0.699846	-0.155572	0	-0.4
1233	0.874929	0.0450864	0.963894	-0.0126542	1	0
1123	3.75252	0.914247	0.864826	0.0959012	0	2.72
153	1.03103	0.0652111	0.460564	0.128049	0	-0.01
1066	3.25977	0.0628245	0.970595	0.0137415	0	3.76
655	3.14965	0.339475	0.83373	0.120557	0	3.59
152	0.737024	0.451746	0.539504	-0.183819	0	0.36
185	1.43063	0.309014	0.681445	-0.0544078	0	2.93
423	2.87586	0.19809	0.787709	0.0926826	0	3.44
774	2.99696	0.127359	0.972005	0.0123786	0	3.46
22	2.06735	0.417751	0.148116	0	0	-0.17
745	1.92064	0.0302405	0.968107	0	0	1.5
338	0.752896	0.135021	0.953381	-0.023602	1	0.23
398	1.83752	0.455536	0.467291	-0.0863687	0	0.83
923	5.54488	0.95981	0.999376	0.000623425	0	5.77
1252	3.66254	0.0862092	0.696815	0.010639	0	3.98
1219	1.43837	0.00475447	0.982372	0.00810487	1	0.85
489	0.988628	0.257969	0.616955	0.0846842	1	2.12
243	0.782284	0.888639	0.951207	-0.0264745	1	1.4
334	1.82519	0.0963425	0.574953	-0.0975243	0	1.01
381	1.21497	0.101744	0.747905	-0.0521881	0	0.02
1056	3.65832	0.0535935	0.926369	0.0302267	0	1.93
1188	3.20615	0.120347	0.980041	0.0125105	0	3.65
1044	2.07264	0.0106181	0.274216	0.022677	1	2
657	3.18692	0.353065	0.845585	0.104663	0	3.62
286	0.649253	0.139632	0.860941	-0.0406798	1	0.33
367	1.93495	0.0233633	0.963983	0	0	1.55
682	0.817649	0.477966	0.337666	-0.153003	1	0.53
15	0.763621	0.0607952	0.957811	-0.0218185	1	0.24
144	0.967974	0.803787	0.197462	-0.236842	0	1.35
951	1.75205	0.080963	0.769352	0.0466266	0	1.34
148	0.798177	0.202872	0.305905	-0.175064	0	0.54
701	2.41235	0.149418	0.289457	-0.0329754	0	4.08
1117	2.21962	0.503761	0.385842	-0.0437829	0	1.89
1192	2.578	0.0667119	0.967844	0.0194509	0	3.1
441	1.11784	0.028781	0.553918	-0.12372	1	0.29
1204	2.95792	0.319721	0.74286	0.0872138	0	3.4
1097	2.36673	0.0375708	0.912992	0.0181361	0	2.65
881	3.5797	0.704325	0.676521	0.0322009	0	3.2
13	0.269929	0.903433	0.275153	-0.294373	1	-0.36
577	0.148701	0.559513	0.725478	-0.182126	0	0
531	0.323008	0.484184	0.38178	-0.104535	1	-0.04
847	2.38079	0.245373	0.406808	-0.095032	1	1.89
931	2.22347	0.381773	0.430979	-0.0443859	0	1.94
1014	3.25949	0.0558253	0.979612	0.0130293	0	3.84
460	2.67623	0.195827	0.715687	0.068152	0	3.18
865	2.64359	0.196762	0.729941	0.0520166	0	1.56
261	0.589666	0.197657	0.89717	-0.063845	1	0.41
457	2.15653	0.226435	0.734791	0.0365015	0	2.67
81	0.21797	0.480086	0.833393	-0.0495497	1	0.78
623	0.714196	0.698234	0.632257	-0.152803	0	-0.28
1314	4.50502	0.912973	0.999575	0.00036572	0	5.19
1207	1.22067	0.157917	0.519142	-0.151238	0	0.52
1158	2.47203	0.0291153	0.814227	0.0198608	0	2.56
1157	3.12609	0.555022	0.878824	0.0823024	0	2.38
487	1.97953	0.00192143	0.642261	-0.0344483	0	2.87
1177	1.7622	0.00370142	0.930944	-0.00966155	1	3.14
24	2.12315	0.00808099	0.926087	0	1	2.63
731	2.53624	0.0248882	0.379109	0	1	2.9
123	1.07953	0.113908	0.397681	-0.0544166	0	0.61
563	0.275126	0.611711	0.689554	-0.137197	0	0
309	2.59187	0.0461345	0.862091	-0.0495436	0	3.22
29	0.346937	0.533903	0.793109	-0.134268	1	0.72
1209	2.02895	0.0601319	0.705926	0	0	2.75
681	0.93613	0.0410399	0.943345	-0.0227454	1	0.74
64	1.49598	0.0267923	0.948699	-0.0152288	1	1
1203	3.02018	0.333035	0.739743	0.147662	0	3.22
162	1.27342	0.014598	0.736886	-0.0463084	0	0.3
382	0.57089	0.411059	0.250625	-0.0947964	0	0.6
323	3.01348	0.0253603	0.537697	-0.0398793	0	0.64
1074	3.29425	0.197371	0.964463	0.0246472	0	3.41
53	0.508367	0.510486	0.883589	-0.0785656	1	0.6
1298	4.81592	0.907494	0.999495	0.00077588	0	5.27
899	5.59599	0.957498	0.999773	0.000292799	0	5.81
546	0.553913	0.291168	0.455946	-0.132574	1	0.18
164	2.0423	0.011484	0.662934	0.00244065	0	1.82
849	2.44349	0.636586	0.570285	0.148244	1	1.3
116	0.542755	0.0702105	0.863509	-0.0484096	1	1.14
536	3.18074	0.093093	0.981846	0.0122497	0	3.3
172	1.1523	0.325978	0.808829	-0.103312	0	0.4
269	2.51548	0.300939	0.711546	0.0695245	1	2.71
107	0.728355	0.111295	0.945521	-0.020443	1	0.1
222	1.57269	0.0307301	0.948917	-0.0234704	0	1.08
1256	2.06302	0.0168751	0.93871	0	1	2.59
692	0.826945	0.0252079	0.972548	-0.0191262	1	0.6
532	0.805035	0.146335	0.878644	-0.0410503	1	1.09
1125	3.73198	0.721666	0.949183	0.0252127	0	3.79
598	1.05853	0.0379207	0.921758	0.014754	1	0.08
1105	2.26981	0.0885871	0.0598	0.00764459	0	3.19
305	3.16435	0.278242	0.925779	0.0380132	0	2.4
667	2.53334	0.282011	0.760477	0.03983	0	1.31
90	0.633994	0.15358	0.916046	-0.0528124	1	0.46
1065	1.88901	0.0336907	0.763073	0	1	0.54
984	2.60496	0.195433	0.886656	0.0655116	0	2.82
63	2.31836	0.285018	0.490008	0.124409	1	3.43
89	1.64336	0.159797	0.779966	-0.0344789	1	2.04
1317	4.21538	0.950594	0.904012	0.123911	0	4.58
165	0.558376	0.125014	0.593493	-0.0759606	0	0.17
1152	0.959081	0.188821	0.699262	-0.0833489	0	1.57
266	1.87231	0.0104922	0.934585	0.0057545	0	1.39
1174	2.3165	0.024509	0.898618	0.023406	1	3.03
482	2.88731	0.522423	0.798692	0.0798598	0	3.42
40	0.61204	0.231405	0.864929	-0.0673244	1	-0.02
488	2.83435	0.153517	0.376745	-0.117152	0	1.15
815	3.39763	0.0464007	0.975841	0.0124569	0	2.62
572	1.25715	0.0233827	0.979869	-0.0131403	1	2.63
149	0.664509	0.115952	0.876001	-0.0608911	0	0.34
721	3.25728	0.785363	0.863626	0.0792536	0	3.87
518	2.30124	0.0151969	0.969598	-0.00604906	0	2.92
897	5.62299	0.957498	0.999773	0.000292799	0	5.54
1278	5.62299	0.957498	0.999773	0.000292799	0	5.54
729	1.20682	0.287349	0.854569	-0.0962381	0	0.98
290	1.53278	0.172979	0.917994	-0.0546491	1	1.88
133	2.50925	0.335082	0.605863	0	0	3.54
540	1.2611	0.00696417	0.729527	-0.109974	1	-0.24
38	0.746709	0.151101	0.961062	-0.0333039	1	-0.04
377	1.11834	0.286049	0.666683	-0.0690175	0	0.86
616	2.01177	0.0222689	0.91468	0	1	2.74
792	2.68313	0.177867	0.923923	0.0603551	0	2.9
359	2.00566	0.310016	0.607883	-0.0389808	0	1.57
147	0.474359	0.775758	0.774623	-0.0732123	1	-0.03
680	0.491244	0.333291	0.851998	-0.0566024	0	1.99
5	2.77808	0.473204	0.912787	0.0663712	0	3.92
1147	2.58001	0.203055	0.913835	0.056302	0	3.03
468	0.293973	0.873373	0.119103	-0.110282	0	1.22
49	0.958262	0.526273	0.847691	-0.119382	1	2.05
7	3.75654	0.66777	0.969776	0.0181545	0	3.51
646	1.85604	0.0714956	0.849427	0	1	1.26
617	1.97396	0.000377109	0.938773	0	1	1.04
738	1.66548	0.00283672	0.896925	-0.00841623	1	0.75
114	1.1035	0.0987767	0.771787	-0.0258645	1	0.28
67	1.20837	0.0428213	0.779284	0.0786738	1	0.71
65	1.95143	0.0540392	0.702459	-0.058792	1	1.13
884	3.66404	0.977921	0.760534	0.0986045	0	4.38
718	2.48447	0.0548853	0.850501	0.0442839	0	2.66
941	0.398596	0.74391	0.743104	-0.197123	0	0.3
160	0.349793	0.290719	0.801817	-0.0781988	0	0.93
796	0.47909	0.00306186	0.868265	0.0893253	0	-0.17
389	0.449407	0.785841	0.684237	-0.198302	0	0.23
1289	4.47535	0.903529	0.936346	0.0321969	0	4.53
171	1.38864	0.07598	0.860662	-0.0314489	0	0.97
812	2.11581	0.00187711	0.704768	0.0340303	0	1.03
177	0.622229	0.654144	0.323026	-0.164692	1	0.2
645	2.95729	0.250161	0.919036	0.0461574	0	2.88
368	2.85359	0.0378014	0.978698	0.0131022	0	2.14
553	1.10478	0.124274	0.959912	-0.0157005	1	1.04
59	0.437197	0.809434	0.841967	-0.0830379	1	0.46
904	4.54003	0.912973	0.999575	0.00036572	0	4.84
347	1.39166	0.0713998	0.86051	0.0264795	0	0.95
1007	1.94784	0.0775142	0.717878	0	1	0.26
458	0.841697	0.326058	0.460231	-0.108836	0	0.9
115	0.805485	0.0714305	0.830358	0.0408595	1	0.54
88	0.491693	0.119563	0.954086	-0.0269341	1	0.48
386	0.90505	0.570908	0.904647	-0.0534616	0	0.57
501	1.27813	0.0268206	0.69312	-0.0645235	0	0.88
715	1.87562	0.00838424	0.952801	-0.00480311	0	2.38
335	2.48992	0.175866	0.727315	0.0733993	0	2.63
1080	3.29372	0.958328	0.793639	0.132098	0	3.34
93	0.785475	0.0301983	0.95983	-0.0177485	1	0.31
575	1.79691	0.243921	0.709893	-0.0272118	1	2.82
973	1.42392	0.0221302	0.978218	-0.00851982	1	2.5
1331	4.85496	0.917464	0.998422	0.000997597	0	5.15
515	0.454146	0.466634	0.69962	-0.152078	0	0.68
650	0.245386	0.418293	0.766278	-0.109295	0	-0.2
534	1.50462	0.0376287	0.8736	0	1	0.38
1308	4.92502	0.912901	0.999558	0.000305156	0	4.18
474	1.34554	0.490745	0.191453	-0.0805204	0	1
18	2.38395	0.244855	0.441348	-0.107479	1	3.28
832	0.972595	0.315202	0.66037	-0.0954455	0	1.21
915	4.01009	0.97431	0.884403	0.0778325	0	4.34
1156	0.925363	0.0470131	0.969161	-0.0122873	1	0.77
867	5.71982	0.989319	0.765113	0.123528	0	5.84
612	0.806883	0.040559	0.981394	-0.0125927	1	0.96
1048	1.63688	0.563487	0.244253	0	1	1.8
1031	2.02004	0.0116503	0.897936	0	0	2.18
315	2.17035	0.00903075	0.923984	0.0161042	1	2.5
525	4.88931	0.5381	0.507545	0.019609	0	3.55
375	0.640756	0.451528	0.705925	-0.126091	0	0.54
949	2.21952	0.294081	0.697353	0.0434885	0	2.39
331	3.39013	0.00302323	0.979939	0.0128213	0	3.81
230	0.644748	0.309129	0.782103	-0.072677	0	1.11
453	1.25306	0.154836	0.689435	-0.0749971	0	2.34
607	1.84352	0.058768	0.882315	0	1	0.74
578	1.03899	0.0064158	0.851096	0.0467994	0	2.22
781	2.75977	0.0281117	0.971541	0.0150064	0	3.27
948	3.67415	0.742501	0.977994	0.026942	0	4
754	1.11032	0.0316368	0.953771	-0.0250471	1	0.65
1285	4.63608	0.912973	0.999575	0.00036572	0	3.88
1332	4.52403	0.912973	0.999575	0.00036572	0	5
223	1.8057	0.000852419	0.920205	-0.0093947	0	1.42
1172	1.37193	0.0381282	0.923673	0.0147918	1	2.18
838	0.984663	0.93243	0.5295	-0.196507	0	0.72
1081	1.85802	0.0861723	0.754019	0.0435651	0	2.41
356	1.25168	0.0796028	0.95352	-0.0228667	1	1.03
379	1.06126	0.0797186	0.725408	-0.0720325	0	0.49
1039	1.01491	0.171247	0.545853	-0.0704807	1	1.03
907	5.5789	0.95981	0.999376	0.000623425	0	5.43
353	1.99034	0.310272	0.607151	-0.0391781	0	1.67
711	0.831058	0.110782	0.939036	-0.0376821	1	0.81
311	3.07073	0.296119	0.92483	0.0410007	0	2.54
445	3.10156	0.489213	0.788404	0.100902	0	3.32
976	0.761311	0.769377	0.925605	-0.0481282	1	0.47
634	0.751321	0.0528335	0.935624	-0.0175085	1	0.66
857	2.09515	0.00681455	0.0882192	0.0112526	1	1.51
1199	3.06431	0.347393	0.777646	0.0964348	0	3.32
405	1.67102	0.00169242	0.796889	-0.070287	0	1.54
255	3.01967	0.0272908	0.755678	0.0223526	0	1.68
1303	4.0214	0.97431	0.884403	0.0778325	0	4.24
861	1.7289	0.0188214	0.825636	-0.0202943	1	1.22
747	1.93391	0.069242	0.78837	-0.0230507	0	1.77
292	0.853523	0.0596349	0.905238	-0.0272114	1	2.32
288	1.96771	0.000131536	0.904363	0	1	2.15
265	0.760935	0.0761279	0.933496	-0.0194843	1	0.3
656	3.16667	0.72166	0.856622	0.104918	0	3.58
283	2.22265	0.166863	0.766245	0.0442785	1	3.68
378	1.57455	0.0769035	0.745949	-0.0254293	0	0.96
14	1.20937	0.0421332	0.949374	-0.014735	1	2.07
1127	3.52144	0.0261119	0.968015	0.0152761	0	2.58
1134	3.15734	0.0542341	0.981516	0.00878384	0	2.39
836	0.893996	0.570908	0.904647	-0.0534616	0	0.67
1168	3.00295	0.0868242	0.899288	0.0128908	0	3.3
1116	3.75292	0.912897	0.762274	0.096873	0	3.58
161	0.58447	0.563149	0.687284	-0.163782	0	1
896	5.7312	0.990338	0.765478	0.123469	0	5.93
1107	3.68643	0.853401	0.714433	0.162798	0	4.05
1118	3.69893	0.628279	0.96089	0.0243479	0	3.97
1029	3.45947	0.08339	0.955461	0.0228419	0	2.83
238	0.8438	0.814176	0.950456	-0.0415402	1	0.57
158	2.31856	0.00111798	0.884451	-0.052784	0	2.48
659	1.31993	0.0335777	0.764183	0.0747062	0	0.51
1268	0.987655	0.0218768	0.968711	-0.0143023	1	0.54
1263	2.97893	0.222248	0.935366	0.0466502	0	2.41
363	1.83044	0.0533658	0.856013	-0.00687736	0	1.54
567	1.54909	0.118654	0.832296	-0.0354007	0	1.45
870	5.633	0.957498	0.999773	0.000292799	0	5.44
472	1.50857	0.140234	0.241841	-0.010326	1	1.46
1017	2.17579	0.121108	0.651902	0	0	1.69
1260	3.20783	0.19899	0.947302	0.0364945	0	3.33
37	0.750909	0.111929	0.918971	-0.0294805	1	0.6
440	0.276246	0.767822	0.713895	-0.128961	0	0.81
336	1.99868	0.16851	0.720252	0	0	2.51
352	3.39141	0.0663736	0.977834	0.0188943	0	3.91
914	1.49365	0.297167	0.76058	-0.0875919	0	2.23
1288	4.48973	0.909437	0.94498	0.0286037	0	4.4
1095	0.438927	0.986323	0.275214	-0.3615	1	1.59
1021	2.19056	0.685063	0.493246	0.158131	1	1.98
1166	2.69174	0.015113	0.867995	0.0234871	0	3.29
310	3.0872	0.182021	0.926039	0.0357333	0	3.17
869	5.62198	0.955104	0.999376	0.000623425	0	5.43
1280	4.54388	0.918694	0.998797	0.0011575	0	4.71
208	1.55571	0.0197276	0.942294	-0.0378457	0	1.08
1089	2.51172	0.00500513	0.704387	0.0411907	0	3.13
105	0.632431	0.630919	0.737353	-0.109369	1	0.24
556	0.691438	0.503998	0.352022	-0.124594	0	2.71
1099	2.7281	0.013169	0.897351	-0.02198	0	2.98
1019	1.82931	0.084609	0.875986	-0.0113819	1	1.41
1322	3.81796	0.97861	0.759903	0.0982479	0	3.21
490	2.1179	0.00537853	0.676761	-0.0548563	0	2.55
974	0.606317	0.926771	0.323051	-0.343547	0	-1
633	1.00524	0.0265202	0.985104	-0.00868994	1	0.86
751	0.981936	0.0423351	0.962519	-0.0155071	1	0.61
387	1.02178	0.00257609	0.978762	-0.00913927	1	0.73
1159	3.27019	0.043963	0.959721	0.0142674	0	3.51
1034	1.67558	0.236366	0.465566	0.0532215	1	1.81
714	1.32906	0.0366764	0.938229	-0.034923	0	0.9
235	2.20284	0.0098577	0.922575	-0.0146111	0	1.6
805	1.78961	0.133304	0.747606	0.0313133	1	0.24
192	0.397032	0.0202586	0.877883	-0.0727287	0	0.1
434	1.2158	0.0957956	0.857374	-0.041563	0	1.35
581	3.67908	0.603301	0.948481	0.0294996	0	4.16
245	3.01818	0.0119425	0.869227	-0.0706631	0	2.43
1003	2.22089	0.134344	0.778796	0.0225103	1	2.46
42	0.439951	0.246088	0.85414	-0.047474	1	0.52
686	1.45137	0.0785822	0.935079	-0.0272685	0	1.29
537	0.317336	0.599213	0.524545	-0.169659	0	0.29
788	0.964327	0.01057	0.977637	0.00894964	1	0.57
905	3.68397	0.744248	0.978351	0.0282015	0	3.9
1186	2.34828	0.0321675	0.946489	0.00441797	0	2.87
723	1.26415	0.286092	0.854293	-0.071597	0	1.18
399	2.79389	0.13332	0.871299	0.0597362	0	2.97
604	1.49573	0.103218	0.836504	-0.064489	1	1.14
985	0.710243	0.424307	0.727049	-0.114695	1	1.76
1212	3.25091	0.195578	0.982287	0.0146518	0	2.91
281	2.12075	3.37166e-05	0.9098	0.0228348	1	2.06
404	1.91332	0.280384	0.207391	0	1	0.26
187	1.39405	0.0450083	0.748743	0.036557	0	0.44
98	0.641624	0.275189	0.928118	-0.0480468	1	1.04
866	5.57968	0.998392	0.474584	0.278757	0	5.29
545	1.16524	0.120801	0.805191	-0.0775361	1	0.28
1149	0.303191	0.0313427	0.00628327	-0.00918733	0	-0.5
627	0.27613	0.717738	0.386458	-0.239141	0	0.2
622	1.01536	0.0343322	0.979674	-0.0106955	1	0.99
1253	2.61413	0.0346584	0.620922	0.0228883	0	3.48
803	2.0136	0.00792808	0.952548	0.00608477	0	2.66
95	1.75819	0.0105643	0.962604	-0.00186294	1	1.42
811	3.91693	0.767004	0.841618	0.0777412	0	4.51
521	0.329967	0.646609	0.481817	-0.205138	0	1.55
27	0.667393	0.919304	0.780183	-0.0960886	1	0.54
294	2.41784	0.0607461	0.890574	0.0128427	1	2.56
638	0.460324	0.00684585	0.870666	0.0912572	0	-0.02
635	1.00443	0.0261375	0.983802	-0.00850297	1	0.86
1076	0.976459	0.0180043	0.778413	0.103164	1	2.33
1274	3.56839	0.824198	0.699634	0.152678	0	3.81
602	2.49965	0.0224044	0.984719	0.00974782	0	2.69
903	4.82297	0.912901	0.999558	0.000305156	0	5.2
789	1.94788	0.0823356	0.794314	-0.0235795	0	1.87
1181	1.93858	0.00855789	0.779917	0	1	3.29
687	3.09443	0.0803802	0.979916	0.0117306	0	2.8
270	2.55854	0.160205	0.428787	-0.209928	1	1.87
274	2.12274	0.000113519	0.910286	0.0228174	1	2.04
427	2.82849	0.0929639	0.985205	0.00771779	0	3.18
233	1.21044	0.83809	0.220044	-0.236967	1	0.91
272	2.01835	0.00231438	0.910325	0.0233138	1	1.63
978	1.73397	0.382704	0.144344	-0.0366834	1	1.64
372	0.739981	0.0671497	0.962208	-0.023753	1	0.14
1092	0.436352	0.505844	0.893324	-0.0786382	1	1.28
436	1.83975	0.0398784	0.708636	0.02157	0	2.54
835	0.95252	0.407486	0.868107	-0.0968822	0	1.02
157	0.841811	0.835133	0.951838	-0.0526732	1	0.85
417	2.23756	0.0687028	0.756595	0.0619727	0	2.9
358	1.57114	3.09299e-05	0.807285	-0.0998231	0	2.26
673	3.29246	0.958328	0.793639	0.132098	0	3.35
439	0.824483	0.0308354	0.959101	-0.0155948	1	0.51
287	1.52826	0.19521	0.924189	-0.0561589	1	1.89
804	1.38508	0.0789317	0.947636	-0.0188828	0	1.03
742	3.1205	0.0795596	0.979564	0.0167379	0	3.29
674	3.14368	0.019189	0.9621	0.0142911	0	3.66
495	1.1657	0.677706	0.47558	-0.178028	0	2.01
1094	1.12353	0.0346285	0.945502	-0.0171515	1	0.59
764	0.639375	0.0713716	0.858004	-0.0422134	0	0.13
601	1.60075	0.125382	0.789159	-0.0152749	1	1.12
156	0.548851	0.208452	0.893897	-0.0379448	0	0.64
697	1.45505	0.246622	0.052352	-0.050923	0	1
1146	2.66119	0.419853	0.163278	0.033698	0	3.95
841	2.8138	0.0544319	0.764826	0.0844529	0	2.72
579	1.12921	0.109767	0.907433	-0.0302869	0	2.42
784	1.87701	0.0387262	0.962056	0	0	1.85
906	4.25409	0.948669	0.903389	0.124644	0	4.23
91	0.602336	0.15358	0.916046	-0.0528124	1	0.75
875	4.63884	0.89135	0.994563	0.00269673	0	4.62
1273	2.18239	0.188068	0.291654	0.0291708	0	1.39
289	1.01807	0.0302668	0.960793	-0.0145665	1	0.67
1195	2.16341	0.0127134	0.619575	0.0919901	1	2.06
1190	3.29624	0.219257	0.98058	0.0156882	0	3.12
3	0.80674	0.929106	0.216588	-0.294191	0	0.59
1100	1.51659	0.176217	0.896501	-0.0508386	1	1.92
798	0.719251	0.214419	0.951392	-0.0388114	1	0.49
733	1.01012	0.2832	0.672837	-0.0947279	1	0.3
1329	3.38591	0.798597	0.767003	0.129614	0	3.66
312	3.09639	0.248127	0.947248	0.0355471	0	3.26
325	1.75063	0.126789	0.711206	0.0414161	1	2.82
679	1.95209	0.0746545	0.869478	0.0105404	1	3.59
762	0.802247	0.797903	0.947075	-0.068755	1	1
68	1.913	0.0540392	0.702459	-0.058792	1	1.4
943	4.62998	0.918694	0.998797	0.0011575	0	3.85
16	0.729167	0.0607952	0.957811	-0.0218185	1	0.57
957	0.610088	0.121665	0.964242	-0.0290781	1	1.28
47	1.47245	0.339463	0.870587	-0.0669602	1	1.04
1232	0.634229	0.324503	0.39245	-0.0991259	1	0.3
693	0.358492	0.532409	0.762229	-0.152759	1	0.66
1075	2.04299	0.0697674	0.831707	-0.011555	0	1.46
416	0.41432	0.000163903	0.896171	-0.0750831	0	0.38
220	1.18639	0.00190144	0.914527	0.0346733	0	1.17
1161	3.10643	0.374966	0.856913	0.0666234	0	2.8
611	0.455015	0.648814	0.470602	-0.182066	0	0.25
1325	3.67273	0.914247	0.864826	0.0959012	0	3.41
730	0.777975	0.797798	0.946895	-0.0689155	1	1.23
318	2.85394	0.00175619	0.979819	-0.00984464	0	3.42
394	3.283	0.0360186	0.975017	0.0100399	0	3.44
918	4.56011	0.90698	0.99908	0.00105717	0	4.64
586	0.823932	0.0257631	0.971413	-0.017685	1	1.48
749	1.0925	0.0316368	0.953771	-0.0250471	1	0.82
1247	0.770953	0.0385193	0.931158	-0.0285991	1	0.11
508	0.849247	0.294526	0.0654454	-0.056098	1	1.14
644	0.864475	0.00771644	0.964392	-0.0124317	1	0.28
740	3.12335	0.191853	0.938384	0.0499447	0	2.56
831	1.12842	0.293033	0.80978	-0.101027	0	1.11
31	2.08048	0.0381509	0.919147	0.00919064	0	1.52
284	1.33511	0.0454145	0.939331	-0.0214727	0	1.18
273	2.11162	9.59571e-06	0.913959	0.020822	1	2.23
647	1.59038	0.169294	0.865992	-0.0549638	1	1.28
970	2.60456	0.464621	0.266146	0.0847667	1	1.42
1304	2.42177	0.0671749	0.392168	0	1	1.91
473	1.27286	0.0446426	0.0124789	-0.0132503	1	1.48
511	1.49838	0.19289	0.777804	-0.0183124	0	1.31
678	1.36168	0.249086	0.919511	-0.0809138	0	2.03
760	1.63773	0.0288943	0.953219	-0.0280191	0	2.08
555	1.69681	0.0209901	0.808727	-0.03886	1	2.48
922	5.45044	0.998446	0.474375	0.279007	0	5.92
1165	3.41283	0.00628275	0.977146	0.0132025	0	3.58
48	0.378194	0.716204	0.767216	-0.072021	1	1.04
785	3.01274	0.123745	0.973792	0.0133822	0	2.79
1129	1.37766	0.0859063	0.822329	-0.0479511	0	1.72
725	0.558925	0.468436	0.899617	-0.0753047	1	0.2
821	4.69799	0.104399	0.0943487	0.00413251	0	1.98
1323	3.38036	0.738939	0.644412	0.18519	0	2.82
637	0.593752	0.0951518	0.923939	-0.0251467	1	0.19
844	0.44721	0.62041	0.699876	-0.185183	0	0.12
357	2.79989	0.0297825	0.980651	0.0125853	0	3.26
1113	3.59381	0.958017	0.872935	0.11903	0	3.9
11	3.69278	0.0824468	0.977512	0.0108784	0	3.66
587	1.97664	0.00678389	0.92757	0	1	1.84
176	0.313703	0.693601	0.846674	-0.0431646	1	0.1
1085	1.45053	0.0367927	0.706007	0.0272334	1	0.49
600	2.56593	0.046881	0.980134	0.0155964	0	2.77
1	2.36233	0.0102316	0.966095	0.00424706	0	2.19
1061	2.78751	0.0827312	0.980411	0.0160238	0	2.69
1311	4.23859	0.948669	0.903389	0.124644	0	4.37
689	0.807828	0.038258	0.973225	-0.0162196	1	0.76
154	0.570158	0.554343	0.687797	-0.165435	0	1.08
969	2.88946	0.335826	0.889969	0.0452421	0	3.48
1316	4.56411	0.90698	0.99908	0.00105717	0	4.6
1270	3.92644	0.765963	0.822151	0.0857	0	4.48
994	1.11589	0.00496151	0.826044	0.0772646	1	0.4
704	3.35343	0.146017	0.96453	0.0187161	0	2.38
858	3.78948	0.970481	0.847504	0.0959366	0	3.24
618	1.75041	0.017123	0.913031	-0.0174824	1	1.56
151	0.448041	0.14106	0.911584	-0.0399207	0	0.46
1082	3.2627	0.752712	0.884767	0.113983	0	3.09
321	0.56101	0.108932	0.931907	-0.0471838	1	0.76
873	3.51413	0.626515	0.653179	0.0423219	0	2.82
215	1.54877	0.0250321	0.941612	-0.0367492	0	1.2
908	3.17339	0.365756	0.780324	0.102863	0	2.4
6	3.79057	0.66777	0.969776	0.0181545	0	3.18
1128	1.72274	0.0707105	0.615322	-0.0156178	0	1.87
303	2.18366	0.00762571	0.904701	-0.0183098	1	2.19
876	3.66407	0.742502	0.977998	0.027019	0	3.75
10	2.57442	0.0371929	0.956438	0.0097569	0	1.67
993	0.381276	0.817932	0.382676	-0.204608	0	1.97
401	1.83299	0.377902	0.468317	-0.0480508	0	1.48
1318	4.56605	0.912973	0.999575	0.00036572	0	4.58
688	0.781191	0.0376825	0.972464	-0.016397	1	1.08
557	1.16049	0.00859159	0.807394	0.0479895	0	1.56
768	0.850592	0.00915512	0.967122	-0.0196785	1	0.88
212	1.35627	0.119723	0.811496	-0.0414269	0	2.22
1137	1.96801	0.026205	0.790242	0	0	2
676	1.89557	0.0876021	0.752984	0.0436424	0	2.13
1114	3.58923	0.958017	0.872935	0.11903	0	3.94
278	1.59418	0.251215	0.918712	-0.0642938	1	1.13
883	3.69238	0.988389	0.856492	0.110492	0	3.58
910	5.76125	0.990338	0.765478	0.123469	0	5.7
351	3.01782	0.00306585	0.875671	0.0185154	0	4.66
1164	3.09066	0.0884588	0.952823	0.0243079	0	3.5
304	2.99403	0.569698	0.871805	0.0855818	0	2.83
406	1.6383	0.00169058	0.796631	-0.0704048	0	1.8
36	0.499644	0.523949	0.263857	-0.173666	0	0.32
1073	0.422152	0.412308	0.768913	-0.145053	1	0.77
712	3.05621	0.191853	0.938384	0.0499447	0	3.19
127	0.384207	0.606149	0.704752	-0.20287	0	0.62
395	1.74706	0.0131996	0.935797	0.00713712	1	2.35
932	4.83898	0.912901	0.999558	0.000305156	0	5.04
393	3.17005	0.0206186	0.947481	0.0190454	0	4.97
349	1.73498	0.00294667	0.923329	0.00857555	1	1.31
1291	3.36967	0.738256	0.645514	0.181622	0	2.88
102	0.704875	0.582373	0.774697	-0.108136	1	0.06
35	0.253324	0.705274	0.393049	-0.247516	0	0.2
939	3.52634	0.980261	0.831466	0.115979	0	3.3
720	2.98413	0.0346933	0.888938	0.0824701	0	2.36
685	1.45715	0.00218022	0.978172	-0.0105002	1	1.88
362	3.52478	0.00631981	0.98597	0.00817787	0	3.45
1045	3.37214	0.225103	0.868587	0.036379	0	2.96
930	3.98667	0.706634	0.726164	0.115308	0	4.57
364	2.72774	0.056068	0.969239	0.0122394	0	2.73
771	2.35956	0.0931451	0.765677	-0.0361896	0	2.88
1245	1.39353	0.0236053	0.917901	0.0605238	0	1.74
739	0.652233	0.306573	0.885651	-0.0487203	1	0.5
605	0.636696	0.698234	0.632257	-0.152803	0	0.21
828	0.625187	0.124591	0.928881	-0.04228	1	0.36
719	2.51143	0.0157172	0.984959	0.00930066	0	2.54
594	2.57205	0.046881	0.980134	0.0155964	0	2.71
695	1.11439	0.102211	0.870745	-0.0566602	0	0.9
1292	3.70977	0.916477	0.868706	0.0920569	0	3.11
1043	1.00961	0.580704	0.169683	-0.0526315	0	1.49
126	0.438154	0.552494	0.747205	-0.171325	1	-0.2
1201	3.04359	0.344468	0.662222	0.107703	0	3.34
1178	3.40015	0.137404	0.959896	0.0330889	0	3.18
339	2.94318	0.0627755	0.978134	0.0136571	0	2.9
1271	3.7267	0.974998	0.200381	0.278145	0	4.55
345	1.50096	0.0512914	0.850688	0.019965	0	-0.21
782	0.846429	0.00831344	0.967719	-0.0194551	1	0.92
580	2.8642	0.061139	0.970597	0.019353	0	2.5
1071	1.75198	0.132985	0.834318	-0.0380289	1	1.23
1221	0.81113	0.100723	0.966994	-0.0273003	1	1.2
44	2.37324	0.11048	0.618009	0.224536	1	2.78
76	0.479175	0.11944	0.953781	-0.0269703	1	0.6
1022	3.17143	0.0103115	0.950883	0.0186162	0	4.97
807	0.864519	0.791366	0.833485	-0.125312	0	1.03
476	3.10451	0.220277	0.916028	0.0505472	0	2.57
1309	4.85694	0.907494	0.999495	0.00077588	0	4.86
118	2.40436	0.107785	0.875588	0.0831279	0	1.63
960	1.35493	0.0465332	0.948097	-0.0201925	0	1.32
428	0.784441	0.307789	0.0480361	-0.0923129	1	0.62
258	1.01675	0.0258599	0.951526	-0.0144683	1	1.12
574	0.828321	0.113783	0.965653	-0.0209755	1	1.99
1024	2.91374	0.225721	0.775154	0.0569079	0	3.25
322	1.72951	0.0284253	0.837771	-0.013054	0	2.26
1126	1.67025	0.23694	0.789522	-0.0601536	1	0.6
1028	3.36478	0.14514	0.957545	0.0349212	0	2.89
722	1.42958	0.0356861	0.767504	-0.0612755	1	1.21
1016	1.06267	0.104129	0.830812	-0.05088	0	2.23
231	1.47095	0.0682116	0.915532	-0.0334101	0	1.52
140	0.425272	0.0459336	0.860595	-0.0696111	0	0.3
248	1.02819	0.241923	0.79631	-0.0892166	0	1.24
491	1.8023	0.346656	0.416719	-0.0653432	0	2.29
1264	2.97189	0.464998	0.911547	0.0617818	0	2.73
1035	1.51732	0.0202314	0.519516	0.088929	0	1.76
1070	0.557126	0.0649383	0.963886	-0.0230722	1	1.42
845	2.29279	0.0232941	0.969723	0.00589427	0	1.86
184	0.445214	0.0744319	0.863071	-0.0585712	0	0.08
169	2.81422	0.0538282	0.568623	0.0935369	0	3.36
189	1.14281	0.139265	0.823558	-0.0600534	1	1.12
419	2.24802	0.0310551	0.981722	0.00690979	0	2.3
343	1.16525	0.0408167	0.84069	0.0380623	0	1.57
1216	1.86629	0.0240451	0.93364	-0.00642344	1	1.9
793	2.96756	0.0885954	0.973663	0.0136311	0	2.52
1305	4.0327	0.97431	0.884403	0.0778325	0	4.14
675	1.30109	0.0883007	0.941313	-0.0286658	0	2.24
519	1.09018	0.122322	0.83786	-0.0670859	0	2.5
791	2.56025	0.148617	0.898203	0.0334813	0	2.52
483	1.48796	0.080071	0.596188	-0.0318373	0	0.84
1279	5.63398	0.955104	0.999376	0.000623425	0	5.31
1324	3.46923	0.797127	0.772757	0.120137	0	3.01
1217	2.24126	0.0236222	0.675387	0.0106545	1	2.59
1313	5.63394	0.95981	0.999376	0.000623425	0	4.88
554	2.27714	0.00242401	0.907275	-0.0145775	0	1.94
843	0.938539	0.639919	0.856651	-0.079645	0	0.66
955	2.90983	0.292699	0.81522	0.0758496	0	2.43
972	1.19076	0.0662786	0.843714	-0.0142213	1	1.71
411	2.81548	0.156135	0.70469	-0.0588466	0	2.76
409	0.677062	0.35218	0.742824	-0.0865646	0	0.74
961	1.90276	0.0244452	0.963144	-0.00453058	0	1.56
1302	4.62036	0.971137	0.820964	0.0788859	0	4.08
277	2.58123	0.305568	0.709068	0.0680801	1	2.19
677	3.29774	0.752712	0.884767	0.113983	0	2.78
400	2.25184	0.00573462	0.865071	-0.0462667	0	2.5
219	1.13617	0.143935	0.794064	-0.0731851	1	0.77
1197	3.04086	0.305328	0.770775	0.0921725	0	3.18
1038	3.43361	0.0490995	0.971322	0.0113858	0	2.85
999	0.786969	0.0144359	0.889402	-0.0252658	0	1.3
670	3.29096	0.752712	0.884767	0.113983	0	2.84
783	1.65469	0.000760532	0.949644	-0.0204089	0	1.92
856	4.56393	0.917885	0.956748	0.0201505	0	3.7
797	0.897336	0.000690229	0.967123	-0.0179022	1	1.33
1283	4.86194	0.907494	0.999495	0.00077588	0	4.81
486	1.00408	0.204422	0.56363	-0.122212	0	1.44
217	0.546281	0.644813	0.903812	-0.0570052	1	-0.23
54	2.06834	0.30918	0.725168	0.0598272	1	2.36
668	0.209409	0.630937	0.638623	-0.198072	0	1.03
1015	3.15973	0.200231	0.982013	0.0122609	0	3.13
193	0.531673	0.835004	0.85509	-0.0779307	1	0.7
120	1.31703	0.0978086	0.884893	0.0136466	1	1.48
1294	4.88495	0.907494	0.999495	0.00077588	0	4.58
917	4.56111	0.90698	0.99908	0.00105717	0	4.63
390	0.408759	0.828509	0.727863	-0.174087	0	0.49
824	2.9943	0.0606165	0.971688	0.0124529	0	2.92
332	2.76672	0.15572	0.88813	0.0354552	0	2.78
819	3.84708	0.914728	0.513988	0.322084	0	3.86
1120	3.54681	0.988319	0.855054	0.11077	0	4
181	1.01861	0.359745	0.843015	-0.114524	0	1.3
662	1.47594	0.305659	0.916859	-0.0870049	1	1.55
214	1.47883	0.0304001	0.935421	-0.0357115	0	1.91
799	0.668798	0.214419	0.951392	-0.0388114	1	0.97
1151	2.229	0.000227603	0.614297	-0.0612455	0	2.15
770	0.85195	0.79519	0.943723	-0.0697912	1	0.84
329	1.62189	0.00168708	0.800151	0.0693136	0	1.91
1004	2.49749	0.0984106	0.74877	0.0388333	1	2.02
512	1.042	0.158474	0.81494	-0.0661163	0	1.89
1040	2.60157	0.0194083	0.765838	0.0770936	0	2.29
591	3.41131	0.118015	0.918502	0.0473618	0	2.52
360	3.18664	0.105167	0.9823	0.013048	0	3.87
1234	0.769133	0.0145572	0.941118	-0.0302515	1	0.2
1086	0.279354	0.709349	0.826218	-0.0727954	1	1
632	0.925522	0.880667	0.904666	-0.047854	1	0.06
280	1.81273	0.16253	0.784158	-0.0162093	1	1.96
66	2.11393	0.297997	0.722768	0.0610829	1	2
1051	3.10918	0.491619	0.776025	0.127281	0	3.3
597	2.7613	0.133645	0.853202	0.0349666	0	3.64
968	3.15237	0.11662	0.925097	0.0332066	0	3.5
513	0.532537	0.28518	0.826882	-0.0787042	1	0.62
890	3.64703	0.91089	0.859948	0.0998625	0	3.61
218	0.496683	0.367424	0.517378	-0.125048	0	0.11
365	2.8162	0.0297825	0.980651	0.0125853	0	3.1
174	0.678739	0.814908	0.554843	-0.214128	0	0.1
992	1.52566	0.0656648	0.881111	-0.0231861	0	1.57
1087	1.32559	0.0410521	0.91725	-0.0295279	0	1.16
1106	3.4679	0.900342	0.788746	0.120559	0	3.81
466	2.74524	0.00449209	0.970477	0.00815661	0	2.97
826	3.93571	0.90002	0.600005	0.285678	0	4.29
707	4.4918	0.921591	0.765079	0.0901873	0	3.83
840	0.744625	0.875746	0.836256	-0.0872076	1	0.1
569	1.08045	0.00770003	0.907354	-0.0237861	1	2.42
324	1.64238	0.0795271	0.738452	-0.0342614	0	2.42
1167	3.05934	0.0821267	0.959077	0.0242445	0	3.37
263	3.18681	0.0604562	0.836315	0.0230811	0	1.17
829	0.827849	0.41743	0.660476	-0.0358842	0	1.2
333	3.7486	0.0791299	0.972388	0.0107666	0	3.14
301	2.77031	0.00627216	0.852219	0	0	4.26
503	2.3571	0.0672645	0.464092	-0.133425	0	1.59
46	0.358691	0.538896	0.32985	-0.131996	1	0.2
895	3.68675	0.969687	0.83827	0.0976458	0	3.7
1058	1.12404	0.088887	0.832571	0.0320315	0	1.28
1246	3.41572	0.773654	0.837237	0.0646336	0	3.5
203	2.25678	0.304138	0.614687	0.122567	0	1.98
1180	0.857488	0.399313	0.610094	-0.122602	1	0.94
909	0.451659	0.518713	0.791957	-0.160345	0	0.11
234	3.17083	0.147462	0.981003	0.0149524	0	2.72
698	2.17654	0.00478342	0.791631	0	0	3.73
229	0.962932	0.00485758	0.839832	0.0617603	1	1.29
282	2.21471	0.173346	0.644576	0.024525	1	3.31
963	0.304567	0.702968	0.730334	-0.201724	0	0.58
925	2.1893	0.0455402	0.911368	0.0084011	0	2.44
112	0.602348	0.155006	0.926535	-0.0402972	1	1.3
599	2.27023	0.0739472	0.852792	0.0576572	0	1.61
790	1.17125	0.0789446	0.872944	-0.0661631	0	1.03
1176	0.664506	0.779708	0.357123	-0.285113	1	0.48
300	3.44119	0.00136725	0.985698	-0.0115833	0	3.29
823	3.39919	0.0689563	0.977741	0.0160766	0	2.49
241	1.06294	0.312786	0.881222	-0.124025	0	1.12
396	1.70106	0.00300574	0.930144	0.00832889	1	2.61
1122	3.67895	0.915507	0.766504	0.0957048	0	3.57
1266	2.74496	0.149338	0.92854	0.0557798	0	2.31
499	2.22434	0.0121484	0.69453	0.0527071	0	2.16
988	1.47284	0.0853312	0.407778	-0.039922	0	1.72
58	0.587063	0.739714	0.414392	-0.181729	1	0.31
864	4.19892	0.892818	0.895605	0.0393347	0	3.64
134	1.49082	0.0396099	0.952458	-0.0165882	0	1.83
442	0.548548	0.140395	0.900669	-0.0524794	1	0.7
74	1.55983	0.000226932	0.969042	-0.00856734	1	1.56
1145	0.853973	0.773236	0.710479	-0.0598214	1	0
839	1.344	0.115765	0.66696	-0.0708217	0	0.38
23	1.69876	0.00552678	0.950129	-0.00379327	1	2.21
190	0.49185	0.670022	0.657534	-0.0805521	1	0.48
1237	0.461983	0.180826	0.76081	-0.0416422	0	0.4
276	2.12992	0.0145742	0.908898	0.0457244	1	1.98
43	2.44418	0.136295	0.344363	0.221661	1	2.94
320	1.26788	0.0140229	0.831055	-0.0213425	0	0.86
1250	0.444214	0.00157346	0.944093	-0.0207937	1	1.02
211	1.053	0.0277298	0.834627	0.103773	1	1.08
919	2.9658	0.0238077	0.887998	0.08616	0	2.48
1310	3.71975	0.744248	0.978351	0.0282015	0	3.55
666	0.585774	0.0793652	0.918605	-0.0402687	1	0.24
610	0.913325	0.730195	0.184421	-0.245734	0	-0.11
237	0.854809	0.889606	0.950839	-0.0268072	1	0.71
603	1.29861	0.00474699	0.911249	0.00643022	1	1.11
451	0.785655	0.377975	0.566627	-0.130204	0	0.49
226	1.02901	0.313484	0.88083	-0.123988	0	1.42
1138	1.44853	0.176356	0.768665	-0.0209948	0	1.31
837	0.82544	0.929838	0.209522	-0.288311	0	0.54
1218	3.03865	0.307203	0.824884	0.132601	0	3.01
596	2.84246	0.00814255	0.969355	-0.00976109	0	2.95
494	1.61932	0.00878015	0.0951268	0.0275611	1	1.93
117	2.36346	0.0238597	0.83492	0.0485029	0	2.12
665	1.43923	0.307648	0.916816	-0.0875005	1	1.89
882	3.6702	0.988389	0.856492	0.110492	0	3.77
8	2.99895	0.292926	0.76991	0.110253	0	2.34
1090	2.32428	0.0284438	0.985514	0.00552429	0	2.54
509	0.924239	0.0726241	0.942172	-0.0214566	1	0.54
1299	4.63619	0.971137	0.820964	0.0788859	0	3.95
982	1.51442	0.0449735	0.830567	-0.0124566	1	1.86
965	1.36187	0.0216671	0.938427	-0.0176391	0	0.84
816	3.86251	0.973157	0.194098	0.280436	0	4.31
191	0.474014	0.602935	0.898584	-0.0682267	1	0.24
259	0.558064	0.721779	0.54769	-0.244796	0	0.26
34	0.303455	0.908393	0.428176	-0.334788	0	0.34
706	4.12536	0.926707	0.879562	0.0538281	0	3.61
1013	3.44303	0.00566047	0.986031	0.00863627	0	3.27
1277	4.88504	0.922446	0.996091	0.00194179	0	4.85
571	1.26804	0.0550174	0.956156	-0.0188508	1	1.76
944	3.33979	0.779879	0.870436	0.10592	0	3.02
958	2.85909	0.505644	0.389892	0.0735759	1	2.48
547	1.32322	0.0517172	0.949553	-0.0196662	0	1.62
205	2.10218	0.217839	0.726675	0.0202076	0	1.94
527	0.731329	0.332394	0.665899	-0.099389	0	0.88
700	2.241	0.0220705	0.755482	0	0	3.54
926	4.26516	0.950594	0.904012	0.123911	0	4.13
1023	1.2793	0.0866414	0.886631	-0.0573949	0	2.14
206	0.341169	0.728466	0.77194	-0.155114	0	0.16
308	1.59672	0.00194292	0.799703	-0.10428	0	2.11
122	2.62136	0.126768	0.857739	0.04074	0	2.4
80	0.478649	0.649403	0.870794	-0.0499119	1	0.16
313	2.79563	0.0500496	0.962642	0.0158774	0	2.45
84	0.891239	0.210037	0.915901	-0.0452075	1	0.8
959	1.87369	0.0244452	0.963144	-0.00453058	0	1.84
256	2.28568	0.106623	0.903801	0.0363489	1	1.28
45	2.10144	0.30918	0.725168	0.0598272	1	2.12
820	3.83282	0.909823	0.557287	0.323014	0	4.1
964	1.87936	0.0756956	0.931442	-0.0068977	0	1.49
927	3.68146	0.742502	0.977998	0.027019	0	3.58
275	1.81803	0.0592083	0.892421	-0.012134	1	1.61
1185	2.83521	0.13332	0.871299	0.0597362	0	2.61
795	0.54168	0.141879	0.903966	-0.0423721	1	0.21
636	2.53685	0.0885003	0.826597	0.0271707	0	1.97
295	2.87919	0.464676	0.904145	0.0500342	0	2.87
496	1.92537	0.0229626	0.375431	0.136634	0	1.7
1084	0.828883	0.986317	0.278818	-0.358793	1	0.48
661	0.739734	0.0478235	0.96992	-0.0183302	1	1.71
765	1.73364	0.00182726	0.953003	0.0137962	0	1.96
576	0.328802	0.449493	0.713119	-0.141009	0	0.68
615	0.881481	0.0281123	0.953927	-0.0175769	1	0.51
279	1.56733	0.197084	0.923374	-0.0567244	1	1.53
1135	3.54465	0.0909171	0.967484	0.0211007	0	3.14
207	0.457641	0.629373	0.41582	-0.158501	1	1.32
380	2.9235	0.00603167	0.96777	0.0157428	0	3.45
780	1.1618	0.0580634	0.875824	-0.0618409	0	1.23
1111	3.65269	0.988389	0.856492	0.110492	0	3.92
251	1.00982	0.324901	0.877134	-0.122779	0	1.36
924	4.26108	0.945955	0.902046	0.123535	0	4.1
506	0.892764	0.942364	0.543663	-0.19476	0	1.22
1175	2.44303	0.0741024	0.831838	0.0389127	1	2.2
1153	0.766021	0.505802	0.768422	-0.0886906	1	1.1
55	2.42663	0.11048	0.618009	0.224536	1	2.45
1249	1.39898	0.0199381	0.960177	-0.00992544	1	1.93
813	0.892677	0.777005	0.851192	-0.118711	0	0.8
842	2.91474	0.0688682	0.980348	0.0134012	0	2.65
950	3.05036	0.405866	0.762443	0.11744	0	2.63
224	1.48744	0.0276048	0.940811	-0.0369866	0	1.77
228	1.49115	0.0258695	0.941431	-0.0368353	0	1.74
967	3.23	0.232405	0.886254	0.0546769	0	3.59
643	0.106375	0.485313	0.12705	-0.185544	1	0.02
690	1.98562	0.0554908	0.933846	0.0051052	0	2.3
1112	3.58464	0.958017	0.872935	0.11903	0	3.98
449	1.50498	0.00480694	0.975458	-0.00725355	1	1.83
319	0.631496	0.381515	0.730988	-0.119475	0	0.5
1282	4.86199	0.912901	0.999558	0.000305156	0	4.81
653	3.02839	0.299589	0.788722	0.10032	0	2.5
77	2.10782	0.180644	0.704488	0.058376	1	2.26
1033	3.3164	0.0595077	0.961422	0.016207	0	3.19
130	3.23477	0.669574	0.262146	0.105081	0	3.76
200	2.25456	0.000174276	0.38931	0.163571	0	2.45
543	0.491977	0.787262	0.608618	-0.186442	0	0.54
920	4.59214	0.90698	0.99908	0.00105717	0	4.32
413	0.265468	0.650801	0.822377	-0.0748548	1	0.45
1088	2.33037	0.0284438	0.985514	0.00552429	0	2.48
986	0.375267	0.306624	0.763992	-0.0725124	0	1.48
121	2.00738	0.0175727	0.869683	0	1	1.79
1320	3.70544	0.744248	0.978351	0.0282015	0	3.69
966	1.25844	0.0189241	0.944452	0.0131901	0	1.36
314	0.544646	0.153933	0.86838	-0.0713428	1	0.83
1257	3.32012	0.222591	0.981885	0.0132215	0	2.71
954	3.72834	0.742501	0.977994	0.026942	0	3.47
516	0.560239	0.446378	0.626551	-0.170811	0	1.27
201	2.22919	0.000353861	0.614793	-0.0612912	0	2.15
397	2.52462	0.0226717	0.846426	0.0451174	0	2.7
415	2.77523	0.0804973	0.978102	0.0176882	0	2.8
912	2.79186	0.292699	0.823654	0.0805901	0	2.67
850	5.06728	0.710853	0.639025	0.0345742	0	4.31
199	1.69405	0.105101	0.269651	0	1	1.25
830	1.21376	0.530729	0.0592967	-0.166127	0	0.43
640	1.25744	0.0474912	0.873169	-0.0426834	0	1.58
97	0.572533	0.0917765	0.957301	-0.0272382	1	0.82
703	2.40972	0.0528726	0.605052	-0.0332286	1	0.48
1018	2.31345	0.0181456	0.855906	-0.0514127	0	2.02
1036	2.37579	0.255453	0.184185	0	1	1.61
894	3.33672	0.783402	0.882261	0.0957552	0	3.09
62	2.09875	0.148611	0.706522	0.0643066	1	2.39
741	2.03013	0.0207152	0.9557	0.00526717	0	2.19
1251	1.10891	0.131108	0.689272	-0.037813	1	0.78
299	2.20774	0.0462621	0.912397	0.00825589	0	2.28
1286	5.669	0.957498	0.999773	0.000292799	0	5.08
947	4.59194	0.918694	0.998797	0.0011575	0	4.23
1254	0.909116	0.032856	0.968078	-0.00901387	1	1.34
872	3.51949	0.980108	0.833521	0.117331	0	3.36
552	0.790123	0.0400004	0.983975	-0.0132324	1	1.11
1062	1.59341	0.0167157	0.733429	0	1	0.98
626	0.440406	0.536989	0.670367	-0.190835	0	1
125	0.464127	0.618304	0.509903	-0.196025	1	-0.65
937	2.23054	0.298776	0.695347	0.0442263	0	2.31
92	1.49466	0.0897863	0.916405	-0.0195822	1	1.43
825	3.92805	0.895398	0.642964	0.279423	0	3.97
298	2.8533	0.0443965	0.963751	0.0155685	0	2.77
1306	4.18358	0.896278	0.896563	0.0389319	0	3.79
726	0.869561	0.294949	0.67495	-0.0993314	1	1.07
962	1.88795	0.0477268	0.951414	-0.00595595	0	1.66
			Test Set
ID	RA function(GK)	Abs MaxPos-MaxNeg	Avg.Sim(GK)	gm*SD Similarity	B03[C-N]	logBCF
250	0.659636	0.0342144	0.896263	0.0460495	0	2.88
504	2.35066	0.0693583	0.674978	-0.0840173	1	3.59
1281	5.588	0.955104	0.999603	0.000273889	0	3.36
1242	0.126761	0.109674	0.0143556	-0.0336319	1	1.14
464	2.79907	0.205569	0.678219	-0.0952174	0	1.31
529	1.77246	0.134823	0.802272	-0.0159262	1	3.51
702	0.497412	0.0540515	0.949388	-0.0183617	1	0.28
129	3.20096	0.621259	0.257333	0	0	2.66
846	0.756784	0.987388	0.167369	-0.347947	0	1.36
388	1.07557	0.659933	0.18101	-0.256454	1	-0.73
724	0.65114	0.48597	0.727315	-0.177143	0	0.11
952	5.52492	0.961473	0.998244	0.000820734	0	3.83
639	2.74746	0.0819662	0.908627	0.0239455	0	3.92
1163	1.55573	0.0305105	0.901989	-0.017313	1	3.6
293	2.08845	0.183714	0.380137	0	1	1.92
497	2.1353	0.122155	0.774781	0	0	3.24
505	2.13537	0.131649	0.854953	0.0128922	0	2.98
1265	0.958345	0.103388	0.925029	-0.0328433	1	0.48
630	1.42591	0.111851	0.891652	-0.0189863	1	0.46
1206	2.25509	0.0838471	0.339899	-0.0822588	0	3.04
562	3.14765	0.429693	0.777868	0.0874084	0	3.98
1047	0.757294	0.518404	0.622937	-0.140871	0	2.48
981	2.40593	0.21449	0.571891	-0.0590366	0	0.24
186	1.06906	0.0812565	0.73052	-0.0345885	0	2.61
463	0.972143	0.0458874	0.374114	-0.210421	0	2.4
484	2.08249	0.122366	0.703499	0.0347047	0	3.22
1240	2.68863	0.0345643	0.913794	0.0261152	0	3.62
669	3.69632	0.750076	0.661971	0.0685032	0	4.16
150	0.698744	0.52506	0.612686	-0.197934	0	-0.15
71	1.11203	0.859828	0.318422	-0.300181	1	1.62
956	2.20315	0.179261	0.661361	0.08301	1	3.66
216	2.07516	0.161672	0.622454	-0.0203304	0	1.72
1072	1.28695	0.0108547	0.86451	-0.0215083	0	0.26
82	1.17997	0.0164878	0.810223	-0.0862599	1	0.32
1115	3.62961	0.958017	0.902294	0.109192	0	3.2
585	0.82266	0.0121393	0.967681	-0.0143874	1	0.52
179	1.97901	0.0638961	0.737365	0	0	3.09
1141	0.770275	0.503624	0.303423	-0.151284	0	1
735	0.922261	0.698057	0.931636	-0.0507049	1	0.16
418	0.975091	0.0646516	0.950195	-0.0244364	1	0.2
1032	0.954712	0.177341	0.458369	-0.17555	1	1.77
1293	3.74223	0.739686	0.946768	0.0331942	0	4.04
268	2.44334	0.302509	0.508086	-0.18317	1	3.26
197	2.70478	0.171341	0.789545	0.0556384	0	0.79
787	1.5241	0.0765143	0.951564	-0.0284426	0	1.15
72	2.73157	0.362907	0.404232	0.0641776	1	3.57
1133	0.609775	0.228208	0.906354	-0.0649073	1	0
660	1.1228	0.00405783	0.84205	0.0702991	0	0.12
727	0.56972	0.16165	0.950611	-0.0285234	1	1.91
1213	0.798191	0.000793465	0.953443	-0.0250602	1	1.43
316	0.913899	0.0434235	0.934214	-0.0208486	1	0.49
584	0.259992	0.756382	0.487691	-0.204281	1	0.22
1198	2.98408	0.288894	0.818289	0.0902599	0	3.43
1139	2.21357	0.0888123	0.744815	0	0	3.4
1215	0.274698	0.777521	0.499254	-0.240679	0	-0.22
159	0.8283	0.808003	0.960981	-0.0294015	1	0.71
814	1.21766	0.00860984	0.829592	-0.035533	0	0.74
1131	0.376055	0.852885	0.121235	-0.258899	1	0.09
73	0.2937	0.570842	0.850217	-0.0691997	1	0.78
1224	1.43728	0.0856758	0.934911	-0.0299443	0	1.89
209	0.884244	0.749462	0.938978	-0.0440309	1	0.34
1330	3.66083	0.742502	0.984425	0.0232246	0	2.63
886	4.05757	0.82016	0.691368	0.0600858	0	3.54
302	2.95495	0.458421	0.921918	0.0513223	0	3.55
1046	1.02109	0.0999963	0.817401	-0.0514472	1	1.85
371	2.48284	0.00269812	0.740644	-0.0601771	0	1.5
810	5.52423	0.872614	0.876884	0.00656902	0	3.87
1012	0.801213	0.161067	0.841983	-0.0449092	0	0.6
1067	0.91118	0.212542	0.919585	-0.0511255	1	1.71
136	0.594878	0.212562	0.756448	-0.0634806	0	0.76
1275	2.99354	0.629173	0.823567	0.095137	0	4.05
213	2.11128	0.0876021	0.761569	-0.0255251	0	2.73
766	0.835241	0.0610282	0.969669	-0.0163371	1	0.43
1142	0.268408	0.619182	0.65016	-0.109551	1	1.56
19	2.42804	0.104184	0.88596	0.0307957	1	3.13
628	0.5985	0.0301706	0.970123	-0.0119968	1	0.29
510	1.09988	0.146751	0.779917	-0.0710393	0	2.23
447	1.15411	0.427084	0.597519	-0.0750565	0	0.48
143	0.896384	0.765307	0.402554	-0.272345	0	1.08
713	0.424304	0.752978	0.505175	-0.224724	1	1.16
694	0.503562	0.929431	0.232994	-0.314702	0	0.35
1030	3.30598	0.0924331	0.976247	0.0171929	0	1.87
1230	0.595198	0.8979	0.483396	-0.278759	1	-0.43
929	3.13235	0.274834	0.781661	0.102348	0	2.56
28	0.377029	0.547326	0.158115	-0.1537	0	1.18
1241	0.543766	0.0729559	0.929029	-0.038996	1	1.54
438	0.926933	0.0229547	0.924923	-0.0226347	1	0.6
1202	2.86336	0.292617	0.761393	0.100873	0	3.15
1160	3.08107	0.260598	0.937331	0.0397527	0	2.41
1005	3.26971	0.0304785	0.982271	0.00772701	0	3.71
87	0.880595	0.0406268	0.864679	-0.0401815	1	0.46
573	1.40173	0.0334163	0.913469	0.00511661	1	0.72
800	1.26246	0.00261369	0.81178	-0.0621641	0	0.64
103	3.14831	0.439447	0.837384	0.116666	0	2.06
414	1.67146	0.0525055	0.940256	-0.0214349	1	1.28
1189	2.80609	0.0142084	0.98353	0.00848852	0	3.34
1214	0.0423478	0.359804	0.105121	-0.116917	0	-0.4
370	2.95873	0.00112339	0.974641	0.0149768	0	3.84
101	0.697067	0.237048	0.716215	-0.068041	1	0.58
945	4.82799	0.912901	0.999621	0.000326225	0	5.43
911	3.74212	0.7265	0.956459	0.0284652	0	3.75
227	1.84748	0.147249	0.646743	-0.0879359	0	2.1
435	1.10862	0.111231	0.891074	-0.0655105	0	0.81
1296	2.40126	0.202385	0.482463	0	1	2
991	2.18874	0.0505822	0.804367	-0.0171846	0	1.76
613	0.507918	0.698234	0.702102	-0.199699	0	0.02
1297	4.62993	0.900008	0.998231	0.0011182	0	4.85
743	0.989237	0.0316368	0.962205	-0.0250093	1	0.55
778	1.81691	0.0342281	0.973063	-0.0037515	0	1.55
1183	2.60961	0.00772261	0.711354	-0.0529545	0	2.9
683	3.21409	0.748394	0.908695	0.102175	0	3.19
99	0.653348	0.601592	0.797697	-0.116115	1	-0.19
822	0.591528	0.119196	0.925767	-0.026898	1	-0.02
328	1.55995	1.07615e-06	0.838279	-0.102514	0	1.4
996	2.30226	0.0447017	0.926186	0.0187918	0	1.59
827	1.48666	0.0324587	0.939167	-0.0207745	0	2.35
1109	3.67445	0.0563568	0.975954	0.0145171	0	3.14
410	3.43492	0.00767908	0.981737	0.0122504	0	3.99
1025	0.689991	0.0733746	0.811473	0.0541727	0	1.29
469	1.48018	0.863878	0.113523	-0.216491	1	0.54
620	2.57969	0.174973	0.762097	0.0816466	1	1.84
86	1.08904	0.859171	0.262021	-0.279448	1	0.08
57	1.81114	0.0540392	0.743792	-0.0334973	1	1.22
1225	1.26579	0.000755969	0.880963	-0.035663	0	1.68
756	1.16859	0.0408031	0.829991	-0.05733	1	0.84
1104	2.92965	0.207371	0.948588	0.0484546	0	3.48
631	0.912385	0.00711756	0.960293	-0.0139398	1	0.68
551	1.22299	0.102557	0.957896	-0.0233345	1	0.9
32	0.223653	0.993935	0.42051	-0.387952	0	0.3
1196	3.11449	0.558177	0.827901	0.100076	0	3.32
1008	3.4246	0.0845108	0.982502	0.0188387	0	3.76
1059	2.4854	0.00300081	0.955571	0.00820819	0	2.74
252	0.87533	0.895184	0.954079	-0.0274379	1	1.34
1130	1.57127	0.149423	0.641962	-0.0420285	1	2.72
940	3.34905	0.73957	0.698901	0.202643	0	2.46
17	0.72511	0.0717306	0.963805	-0.0227262	1	0.4
582	1.95528	0.053177	0.886931	0	1	2.96
1037	3.29325	0.200604	0.947589	0.0282723	0	2.07
478	0.876786	0.523517	0.272443	-0.0975568	0	1.17
1200	3.12306	0.401588	0.751517	0.0789539	0	3.29
763	2.10797	0.00349853	0.980545	-0.00141547	0	2.79
79	0.432016	0.707218	0.891202	-0.0574688	1	0.38
1258	2.81479	0.00744695	0.962173	-0.0129245	0	2.82
544	1.08627	0.024186	0.708287	-0.123531	1	0.57
168	0.661698	0.595891	0.338456	-0.157256	0	0.31
221	1.25279	0.135974	0.909455	-0.0359627	0	1.45
240	1.20405	0.0401174	0.93181	-0.0330998	0	1.03
773	0.835241	0.0610282	0.969669	-0.0163371	1	0.89
559	0.383978	0.546723	0.752085	-0.16015	0	1.04
902	4.63896	0.90698	0.999363	0.000847021	0	4.93
648	0.403874	0.597621	0.524947	-0.121016	0	-0.26
550	1.06713	0.0680124	0.926912	-0.0171073	1	1.01
1020	0.663728	0.434392	0.733134	-0.0979338	1	1
376	1.12749	0.309351	0.647958	-0.0673579	0	2.15
1144	0.596722	0.254442	0.77449	-0.0766615	0	1.2
1091	1.58536	0.1767	0.919722	-0.0481975	1	1.99
1068	0.783013	0.626218	0.329611	-0.151358	1	0.36
96	1.19442	0.0194848	0.809767	-0.0815434	1	0.91
772	0.533935	0.721028	0.889774	-0.0468625	1	0.1
549	1.64945	0.00545395	0.970058	-0.00322051	1	2.32
1193	0.859699	0.0567688	0.865096	-0.0284533	1	0.51
348	2.14083	0.0506238	0.753389	-0.0245192	1	2.86
538	0.956261	0.0116862	0.879512	-0.0671824	1	0.24
52	0.953593	0.153054	0.819911	-0.0414952	1	0.17
244	0.415865	0.358558	0.667897	-0.0129421	1	0.39
928	4.23277	0.950594	0.935439	0.0999294	0	4.33
1154	0.85828	0.00424232	0.670631	0.0423508	1	0.97
306	3.1882	0.236832	0.957263	0.0341018	0	3.3
1319	4.29235	0.948669	0.934504	0.101899	0	4.47
901	4.63896	0.90698	0.999363	0.000847021	0	4.64
1011	1.78347	0.355689	0.323724	-0.0382527	0	2.18
1301	4.06038	0.97431	0.905877	0.0770593	0	4.11
1006	3.0144	0.118104	0.891384	0.0335699	0	2.12
980	0.612452	0.217229	0.774953	-0.050577	1	0.77
195	3.23163	0.0206703	0.969541	0.010567	0	3.58
891	2.08854	0.0267088	0.784026	0.0746818	1	1.8
198	2.06045	0.0837585	0.860704	-0.00957704	0	2.71
1108	1.29147	0.0389881	0.881891	-0.0458612	0	2.28
1262	2.94132	0.534793	0.854256	0.0953652	0	3.17
75	0.588102	0.906951	0.813463	-0.123291	1	0.04
1300	4.63987	0.971137	0.842682	0.0953876	0	4.21
524	2.48704	0.121381	0.891719	0.0307456	1	2.5
1187	2.38172	0.0984633	0.803032	-0.0301763	0	2.78
888	2.97504	0.10739	0.692629	0.0151057	0	3.5
753	0.827058	0.587772	0.9216	-0.04633	0	1.12
1143	0.595205	0.751293	0.53807	-0.235945	1	-0.1
1248	1.49234	0.0694945	0.831047	0.0582095	1	0.18
167	0.66158	0.945618	0.565893	-0.248406	0	-0.04
818	3.87813	0.710776	0.417188	0.216602	0	3.95
426	2.70009	0.170756	0.828299	0.0507473	0	2.63
1229	0.718269	0.221129	0.793624	-0.0610829	1	0.2
913	2.33206	0.249382	0.724183	0.0256031	1	1.98
684	0.598844	0.124808	0.954166	-0.0352693	1	0.82
658	1.53515	0.104738	0.912272	-0.0315071	0	2.24
608	0.550245	0.352821	0.779479	-0.102321	0	0.53
1102	1.75778	0.0681627	0.75335	-0.0152472	0	1.23
1026	3.41903	0.0254322	0.973187	0.0110547	0	3.41
936	4.29235	0.948669	0.934504	0.101899	0	4.36
1276	1.03844	0.200635	0.564667	-0.0957431	0	1.3
995	0.367138	0.0125993	0.906189	-0.0782832	0	1.42
979	1.50736	0.0729216	0.622783	-0.0669453	1	1.08
355	1.33211	0.0845957	0.936904	-0.0278146	0	1.48
862	5.51336	0.998856	0.549658	0.310605	0	5.82
225	1.14507	0.0428767	0.903237	0.0314682	0	0.26
437	1.2292	0.159576	0.860376	-0.0527025	0	1.49
1050	3.15967	0.15797	0.897739	0.0492547	0	4.26
443	0.623731	0.433188	0.76906	-0.124628	0	0.88
459	0.920464	0.384234	0.570718	-0.123838	0	0.62
461	2.97282	0.273337	0.761067	0.103287	0	2.38
1238	1.3889	0.00250608	0.873894	-0.0160216	0	0.93
342	3.35216	0.135145	0.971493	0.0235328	0	3.66
78	1.34276	0.0260306	0.793133	-0.0782244	1	1.57
232	1.7161	7.92211e-05	0.954476	0.0179603	0	1.66
664	0.736174	0.0759014	0.971746	-0.00830488	1	1.93
625	0.567351	0.0997274	0.972907	-0.0214777	1	0.5
593	3.32927	0.0599291	0.96396	0.0184415	0	2.67
239	0.453453	0.53081	0.583147	-0.164847	0	0
139	0.434501	0.104678	0.875992	-0.0642919	0	0.3
1267	3.05972	0.191853	0.950119	0.0491747	0	3.18
1261	3.35098	0.188527	0.969113	0.00731009	0	3
1064	2.42855	0.0347216	0.987236	0.0104019	0	2.69
1326	2.87908	0.105185	0.689022	0.0133206	0	3.63
166	1.46749	0.0285465	0.96216	-0.0147673	0	1.94
100	0.653348	0.601592	0.797697	-0.116115	1	0.65
1049	1.78141	0.0296538	0.819431	0.00891829	1	1.11
507	1.09581	0.0541413	0.365136	-0.141415	1	1.33
194	2.99764	0.210351	0.868938	0.0521831	0	2.82
900	4.82801	0.907494	0.999747	0.000326225	0	5.01
12	1.15418	0.137953	0.793041	-0.033332	0	0.98
492	2.71998	0.206344	0.807495	0.0685978	0	2.34
542	1.04066	0.108074	0.887242	-0.0302451	1	2.01
188	0.443064	0.198565	0.0610308	-0.0659587	1	1.87
1295	4.82799	0.912901	0.999621	0.000326225	0	4.78
1173	2.92946	0.00168416	0.982267	-0.00916262	0	3.29
946	0.451882	0.665634	0.769642	-0.147585	0	0.54
30	0.548986	0.24193	0.0766981	-0.0869939	1	0.49
971	2.86255	0.321828	0.800249	0.128134	0	2.21
717	1.95815	0.0145955	0.963029	0.00583718	0	2.43
307	2.51786	0.415191	0.549369	0.109352	1	2.03
775	1.20454	0.00639166	0.941487	-0.0226581	0	1.28
1077	1.34587	9.75799e-05	0.769813	0.050537	0	1.89
421	2.43519	0.0323508	0.890018	-0.0345833	0	2.13
1194	2.20631	0.147391	0.606317	0.0839198	1	1.97
1255	3.10747	0.301117	0.931101	0.0308416	0	2.91
124	2.31836	0.0173259	0.936281	0.0157503	0	2.45
182	0.822273	0.905743	0.761725	-0.0997956	1	0.44
242	1.44438	0.0236053	0.971832	-0.027705	0	1.31
502	2.489	0.0452948	0.909351	-0.0279557	0	2.49
809	1.69738	0.0402689	0.752438	-0.035913	0	1.74
392	2.88483	0.197591	0.525479	0.11175	0	2.42
877	5.37735	0.707509	0.258385	0.253761	0	5.71
373	3.29688	0.19328	0.957617	0.0285658	0	3.1
748	3.24655	0.346436	0.876245	0.0943278	0	2.95
1009	2.13176	0.07853	0.755039	0.0402835	0	2.19
699	2.47104	0.000299544	0.806337	0.0383205	0	3.44
889	3.74383	0.913409	0.791656	0.119812	0	4.08
736	1.97865	0.0278115	0.939485	-0.00610717	1	1.63
752	2.4006	0.000874696	0.975278	0.00956212	0	2.26
561	0.965445	0.608265	0.428394	-0.13413	0	0.6
871	4.29235	0.948669	0.934504	0.101899	0	3.88
588	2.69046	0.103647	0.630999	0.0382029	0	0.85
391	3.26969	0.0327756	0.981628	0.00816906	0	2.92
671	3.21409	0.748394	0.908695	0.102175	0	2.53
517	0.54698	0.436032	0.488924	-0.0646529	0	0.59
1078	3.70716	0.67674	0.976311	0.0167437	0	3.78
874	3.30113	0.787929	0.913456	0.0793096	0	3.27
271	2.57277	0.302482	0.7471	0.0864164	1	1.83
69	1.49482	0.313859	0.909058	-0.0778876	1	1.03
1312	5.77322	0.990338	0.794803	0.141481	0	5.26
369	2.40309	0.0137149	0.77941	0.0457119	0	0.74
1269	1.92841	0.0222716	0.968793	0	0	1.81
56	2.08158	0.30918	0.766022	0.0656316	1	2.33
860	5.51336	0.998856	0.549658	0.310605	0	5.88
868	5.72693	0.989831	0.79454	0.141547	0	5.12
794	1.79052	0.0771984	0.802277	0	1	0.62
863	3.73839	0.972526	0.881051	0.0825661	0	3.69
833	1.72452	0.0710514	0.770063	0.026074	0	1.6
629	0.719665	0.15557	0.949081	-0.0305519	1	1.09
350	0.409387	0.678407	0.53207	-0.121587	0	0.86
663	0.860957	0.0715301	0.945528	-0.0205457	1	1.56
267	2.23398	0.445246	0.231263	-0.0943206	1	2.48
859	3.93955	0.965452	0.752072	0.115388	0	3.8
456	2.43787	0.0148405	0.960679	0.0103838	0	2.5
1284	4.29235	0.948669	0.934504	0.101899	0	3.93
878	5.51336	0.998856	0.549658	0.310605	0	5.46
106	2.48864	0.0117016	0.962323	-0.00785543	0	2.54
1103	1.49617	0.210266	0.91517	-0.0620987	1	1.69
247	1.55947	0.0792454	0.398982	0	1	1.12
264	2.39565	0.105424	0.802233	0.0248746	0	2.17
938	1.0701	0.187408	0.791462	-0.0562087	0	0.66
777	1.93709	0.0301533	0.963839	0.00406611	0	2.31
9	3.27235	0.119818	0.969252	0.0114585	0	2.51
921	4.59204	0.912973	0.999646	0.000373261	0	4.54
539	0.83686	0.241852	0.679955	-0.0894076	1	0.2
987	0.366931	0.88905	0.805548	-0.0950287	1	0.48
455	1.24737	0.0189812	0.523641	-0.0905523	0	1.04
1184	3.04337	0.428978	0.898151	0.0562837	0	3.02
448	1.30517	0.0298706	0.623987	-0.0977767	0	0.92
614	0.93973	0.0899788	0.885388	-0.035129	1	-0.3
1083	1.66086	0.179155	0.508625	0	0	1.41
291	0.98658	0.0359433	0.974997	-0.0117031	1	1.02
708	3.17782	0.332956	0.866457	0.11024	0	2.84
1148	1.21808	0.0843023	0.773196	-0.0405026	1	0.84
652	3.07168	0.289417	0.955472	0.0249926	0	2.8
898	4.59204	0.912973	0.999646	0.000373261	0	4.3
942	2.77856	0.295893	0.853943	0.0820436	0	2.57
337	1.48893	0.0935595	0.818491	0.0395661	0	2.29
1220	1.47052	0.00764629	0.984941	-0.00578512	1	1.95
761	0.830886	0.796698	0.968604	-0.0348106	1	0.95
173	2.77532	0.191393	0.707197	0.0797395	0	2.76
853	3.55478	0.980046	0.857311	0.11125	0	3.46
60	0.320405	0.680472	0.88855	-0.0384058	1	0.28
998	1.19592	0.0769829	0.775434	-0.0421122	0	1
1010	1.46789	0.0522331	0.967221	-0.0155994	1	1.78
1290	4.55191	0.918694	0.99908	0.00105717	0	4.39
470	1.17907	0.12671	0.176815	-0.0793755	0	1.2
935	4.82799	0.912901	0.999621	0.000326225	0	4.57
934	4.82801	0.907494	0.999747	0.000326225	0	4.58
565	1.23816	0.00456934	0.865888	0.0346003	0	1.24
366	3.10722	0.140747	0.98694	0.0103871	0	2.88
480	0.59043	0.408528	0.0740934	-0.0923627	0	1.38
20	2.5437	0.203671	0.863795	0.0497073	1	2.37
1150	1.63649	0.565879	0.347369	-0.0500549	1	1.46
485	1.34666	0.217138	0.650016	-0.0716611	0	1.1
249	1.2031	0.0574216	0.921614	-0.043624	0	1.52

## Sheet: PRI output file
TestCompNo	Chemical name	Score(Proximity Train YObs Mean)	Score(Similarity based AD)	CompositeScore	PredictionQuality	YPred(Test)	AD status	Closest Training Compound	Euclidean Distance	Generalized Jaccard Coeff.
950	Hexachlorobenzene	2	3	2	Moderate	5.03301	In	707	0.0860476	0.917688
561	Dienochlor	2	3	2	Moderate	4.89297	In	826	0.114863	0.899584
40	2,4-DEP	3	3	3	Good	4.5731	In	1322	0.114461	0.903843
1570	Tetrasul	3	3	3	Good	4.43997	In	1280	0.000854	0.999352
560	Dieldrin	3	3	3	Good	4.26943	In	852	0.113068	0.890476
654	Endrin	3	3	3	Good	4.26943	In	852	0.113068	0.890476
494	DDT	3	3	3	Good	4.24816	In	930	0.0484971	0.957061
1257	O,P'-DDT	3	3	3	Good	4.24526	In	930	0.0492575	0.956252
1256	O,O'-DDT	3	3	3	Good	4.24142	In	930	0.0496581	0.955984
1018	Isobenzan	3	3	3	Good	4.15331	In	1107	0.00491411	0.995573
493	DDD	3	3	3	Good	4.12046	In	811	0.0157659	0.985998
237	Bromocyclen	3	3	3	Good	4.05687	In	930	0.0465498	0.960307
325	Chlorbenside	3	3	3	Good	3.91923	In	1125	0.0319946	0.968227
1652	Tridiphane	3	3	3	Good	3.78079	In	1324	0.0337665	0.975343
326	Chlorbicyclen	3	3	3	Good	3.69202	In	873	0.0784521	0.922662
1071	Leptophos	3	3	3	Good	3.6632	In	7	0.00890081	0.99094
656	EPBP	3	3	3	Good	3.65996	In	581	0.00742832	0.992604
724	Fenchlorphos	3	3	3	Good	3.59491	In	1082	0.0143259	0.990494
1645	Trichloronate	3	3	3	Good	3.57973	In	894	0.0281962	0.973702
371	Chlorphonium	3	3	3	Good	3.49266	In	821	0.162871	0.736848
372	Chlorphonium chloride	3	3	3	Good	3.49266	In	821	0.162871	0.736848
837	Fluorbenside	3	3	3	Good	3.41888	In	522	0.057332	0.934007
1133	Merphos	3	3	3	Good	3.32777	In	728	0.0252355	0.973741
240	Bromophos	3	3	3	Good	3.32098	In	657	0.0206879	0.976597
999	Iodofenphos	3	3	3	Good	3.29263	In	657	0.0203613	0.981024
386	Chlorthiophos	3	3	3	Good	3.24616	In	657	0.0115973	0.987089
553	Dicofol	3	3	3	Good	3.24146	In	1201	0.181272	0.832866
1517	Strobane	3	3	3	Good	3.22551	In	304	0.0506715	0.95885
241	Bromophos-ethyl	3	3	3	Good	3.21393	In	1161	0.0252028	0.972938
330	Chlordecone	3	3	3	Good	3.21103	In	1271	0.203709	0.803632
820	Flufenprox	3	3	3	Good	3.18939	In	522	0.0490858	0.935462
1397	Protrifenbute	3	3	3	Good	3.18164	In	1252	0.0549817	0.935954
768	Fentin chloride	3	3	3	Good	3.17549	In	333	0.0157376	0.980368
1306	Phenkapton	3	3	3	Good	3.17471	In	1218	0.0154227	0.986534
1395	Prothiofos	3	3	3	Good	3.11523	In	1218	0.0226329	0.977515
1609	Tolclofos-methyl	3	3	3	Good	3.08318	In	655	0.0239389	0.9745
1610	Tolfenpyrad	3	3	3	Good	3.08318	In	655	0.0239389	0.9745
288	Camphechlor	3	3	3	Good	3.05985	In	1028	0.0249494	0.967351
1631	Triarathene	3	3	3	Good	3.03233	In	1252	0.0566711	0.922786
951	Hexachlorophene	3	3	3	Good	3.02531	In	1271	0.181493	0.809882
21	1,4-dimethylnaphthalene	3	3	3	Good	3.01622	In	1257	0.00431085	0.994732
698	Ethyl-DDD	3	3	3	Good	2.98704	In	1260	0.0153699	0.981639
511	Di-1-p-menthene	3	3	3	Good	2.97765	In	815	0.00564833	0.992269
343	Chlorfensulphide	3	3	3	Good	2.9616	In	83	0.138768	0.908066
934	Halfenprox	3	3	3	Good	2.92674	In	1013	0.00412231	0.993369
469	Cyhexatin	3	3	3	Good	2.91373	In	815	0.00543421	0.994148
706	Etofenprox	3	3	3	Good	2.86986	In	1014	0.00235504	0.99705
527	Dichlofenthion	3	3	3	Good	2.86848	In	912	0.0257382	0.974824
824	Fluindapyr	3	3	3	Good	2.85667	In	958	0.0834843	0.94951
769	Fentin hydroxide	3	3	3	Good	2.85317	In	360	0.00663008	0.990372
1485	Silafluofen	3	3	3	Good	2.84767	In	536	0.00637025	0.991043
1641	Tributyltin oxide	3	3	3	Good	2.83377	In	1201	0.0467297	0.947528
1058	Kappa-tefluthrin	3	3	3	Good	2.82246	In	1201	0.0537372	0.937649
1548	Tefluthrin	3	3	3	Good	2.82246	In	1201	0.0537372	0.937649
207	Bifenthrin	3	3	3	Good	2.81258	In	460	0.0531139	0.933977
1057	Kappa-bifenthrin	3	3	3	Good	2.81258	In	460	0.0531139	0.933977
52	2-methyl naphthalene	3	3	3	Good	2.75769	In	785	0.0054491	0.993273
1167	Methoxychlor	3	3	3	Good	2.72916	In	687	0.00574476	0.992336
707	Etoxazole	3	3	3	Good	2.71694	In	269	0.050416	0.957925
279	Calciferol	3	3	3	Good	2.70908	In	841	0.0581568	0.927006
23	10,10'-oxybisphenoxarsine	3	3	3	Good	2.70042	In	1266	0.0228239	0.968977
1297	Pentachlorophenol	3	3	3	Good	2.69454	In	203	0.106202	0.893745
26	1-methylnaphthalene	3	3	3	Good	2.68955	In	774	0.00542483	0.99274
558	Dicyclopentadiene	3	3	3	Good	2.68698	In	423	0.0309143	0.959102
1011	Ipflufenoquin	3	3	3	Good	2.68479	In	63	0.0853991	0.922696
719	Fenazaquin	3	3	3	Good	2.68058	In	431	0.0638062	0.942397
1429	Pyridachlometyl	3	3	3	Good	2.67404	In	431	0.0660863	0.947722
871	Flusilazole	3	3	3	Good	2.65142	In	277	0.0527575	0.962176
1258	Octachlorodipropyl ether	3	3	3	Good	2.64934	In	824	0.0141043	0.987949
1459	Quinofumelin	3	3	3	Good	2.64928	In	277	0.067632	0.943506
149	Azocyclotin	3	3	3	Good	2.64925	In	277	0.0751801	0.947128
76	Acynonapyr	3	3	3	Good	2.63897	In	277	0.0559089	0.962334
853	Flupropadine	3	3	3	Good	2.63534	In	63	0.0705863	0.941122
854	Flupropadine hydrochloride	3	3	3	Good	2.63534	In	63	0.0705863	0.941122
846	Fluotrimazole	3	3	3	Good	2.63466	In	63	0.0758034	0.937546
961	Hydramethylnon	3	3	3	Good	2.62734	In	63	0.0691901	0.943598
955	Hexaflurate	3	3	3	Good	2.62254	In	808	0.108264	0.857053
1498	Sodium hexafluorosilicate	3	3	3	Good	2.62254	In	808	0.108264	0.857053
930	Gypsum	3	2	3	Good	2.60812	In	462	0.0437332	0.888594
379	Chlorquinox	3	3	3	Good	2.60119	In	55	0.0795251	0.929544
212	Biphenyl	3	3	3	Good	2.58248	In	580	0.00319149	0.995665
1074	Lindane	3	3	3	Good	2.58194	In	842	0.00474147	0.99372
359	Chloroneb	3	3	3	Good	2.57532	In	1024	0.0327025	0.96535
392	Cinmethylin	3	3	3	Good	2.57472	In	298	0.024455	0.970096
848	Fluoxastrobin	3	3	3	Good	2.57169	In	269	0.0144523	0.987229
337	Chlorfenapyr	3	3	3	Good	2.54957	In	269	0.0102663	0.991062
816	Flufenerim	3	3	3	Good	2.548	In	269	0.00920086	0.991845
801	Flubenzimine	3	3	3	Good	2.54329	In	269	0.0696579	0.95529
512	Diafenthiuron	3	3	3	Good	2.53814	In	431	0.0376252	0.969139
720	Fenbuconazole	3	3	3	Good	2.53729	In	269	0.0357626	0.973264
660	Epofenonane	3	3	3	Good	2.50826	In	365	0.00609756	0.990135
1227	Nanosilver-silica composite	3	3	3	Good	2.50758	In	313	0.00624478	0.991624
1228	Naphthalene	3	3	3	Good	2.50758	In	313	0.00624478	0.991624
119	Amitraz	3	3	3	Good	2.47795	In	1231	0.0470168	0.956818
128	Anilazine	3	3	3	Good	2.46972	In	269	0.016376	0.986882
1010	Ipfentrifluconazole	3	3	3	Good	2.44554	In	1304	0.0684539	0.928256
1123	Mefentrifluconazole	3	3	3	Good	2.43988	In	1304	0.0880404	0.903363
1486	Silatrane	3	3	3	Good	2.43542	In	169	0.0451631	0.923518
1149	Metconazole	3	3	3	Good	2.43305	In	1304	0.0924641	0.899234
1243	Nitrofen	3	3	3	Good	2.43005	In	431	0.0287206	0.977055
990	Indanofan	3	3	3	Good	2.38588	In	457	0.0458267	0.94369
662	Epsilon-metofluthrin	3	3	3	Good	2.38364	In	397	0.0118732	0.981886
1185	Metofluthrin	3	3	3	Good	2.38364	In	397	0.0118732	0.981886
767	Fentin acetate	3	3	3	Good	2.38197	In	1096	0.0157562	0.974611
1677	Umifoxolaner	3	3	3	Good	2.37937	In	62	0.0508949	0.960406
1308	Phenothrin	3	3	3	Good	2.37638	In	732	0.0168619	0.976494
1533	Sumithrin	3	3	3	Good	2.37638	In	732	0.0168619	0.976494
992	Indaziflam	3	3	3	Good	2.37425	In	21	0.0365206	0.966606
210	Biopermethrin	3	3	3	Good	2.37191	In	732	0.0181292	0.972393
396	Cis-permethrin	3	3	3	Good	2.37191	In	732	0.0181292	0.972393
1302	Permethrin	3	3	3	Good	2.37191	In	732	0.0181292	0.972393
1622	Transpermethrin	3	3	3	Good	2.37191	In	732	0.0181292	0.972393
8	1-(4-chlorophenyl)-3-(2,6-dichlorobenzoyl)urea	3	3	3	Good	2.36591	In	77	0.044262	0.962281
357	Chlornitrofen	3	3	3	Good	2.36549	In	269	0.0517721	0.957656
571	Difenzoquat	3	3	3	Good	2.35874	In	21	0.0340963	0.967996
572	Difenzoquat metilsulfate	3	3	3	Good	2.35874	In	21	0.0340963	0.967996
190	Benzobicyclon	3	3	3	Good	2.34631	In	335	0.0352193	0.949138
1654	Trifenmorph	3	3	3	Good	2.33736	In	256	0.0217673	0.982725
1379	Propiconazole	3	3	3	Good	2.33494	In	1231	0.0631536	0.944299
1623	Trans-propiconazole	3	3	3	Good	2.33494	In	1231	0.0631536	0.944299
1008	Ipconazole	3	3	3	Good	2.33353	In	731	0.0766362	0.930673
1619	Tralopyril	3	3	3	Good	2.33151	In	77	0.0480763	0.959321
727	Fenfluthrin	3	3	3	Good	2.33038	In	1096	0.0174062	0.976139
1661	Triflumizole	3	3	3	Good	2.32044	In	45	0.0311917	0.976319
669	Etaconazole	3	3	3	Good	2.32	In	1231	0.060535	0.948604
1606	Tioxazafen	3	3	3	Good	2.31574	In	256	0.0220745	0.981656
1161	Methiozolin	3	3	3	Good	2.31353	In	256	0.02374	0.979081
1564	Tetraconazole	3	3	3	Good	2.3088	In	1231	0.0581097	0.943577
579	Dimefluthrin	3	3	3	Good	2.30712	In	1097	0.0195798	0.970345
1314	Phosacetim	3	3	3	Good	2.30409	In	62	0.0560064	0.952617
1568	Tetramethylfluthrin	3	3	3	Good	2.30305	In	718	0.0136646	0.979494
1127	Meperfluthrin	3	3	3	Good	2.29949	In	1097	0.0230924	0.962908
1468	Renofluthrin	3	3	3	Good	2.29949	In	1097	0.0230924	0.962908
1359	Profluthrin	3	3	3	Good	2.29858	In	1097	0.0190884	0.975341
844	Fluoronitrofen	3	3	3	Good	2.29492	In	283	0.0221784	0.980151
752	Fenpropidin	3	3	3	Good	2.29484	In	1175	0.029861	0.977291
4	(R)-flutriafol	3	3	3	Good	2.28581	In	1304	0.093831	0.912832
6	(S)-flutriafol	3	3	3	Good	2.28581	In	1304	0.093831	0.912832
877	Flutriafol	3	3	3	Good	2.28581	In	1304	0.093831	0.912832
659	Epocholeone	3	3	3	Good	2.28337	In	309	0.017768	0.972512
1563	Tetrachlorvinphos	3	3	3	Good	2.27329	In	481	0.131089	0.808995
388	Cholecalciferol	3	3	3	Good	2.27141	In	465	0.0852469	0.884602
945	Heptafluthrin	3	3	3	Good	2.27054	In	1097	0.0197498	0.975194
338	Chlorfenazole	3	3	3	Good	2.26953	In	1004	0.0511087	0.965471
1621	Transfluthrin	3	3	3	Good	2.26829	In	1097	0.0227016	0.968195
222	Bitertanol	3	3	3	Good	2.26706	In	1304	0.0909271	0.916452
983	Imibenconazole	3	3	3	Good	2.26538	In	1304	0.0709548	0.940221
1432	Pyridalyl	3	3	3	Good	2.26135	In	62	0.0525687	0.955205
574	Diflovidazin	3	3	3	Good	2.25548	In	1195	0.0709409	0.927175
211	Bioresmethrin	3	3	3	Good	2.25368	In	599	0.0150052	0.976604
1469	Resmethrin	3	3	3	Good	2.25368	In	599	0.0150052	0.976604
849	Fluoxytioconazole	3	3	3	Good	2.24907	In	1304	0.090348	0.91814
1427	Pyributicarb	3	3	3	Good	2.24125	In	256	0.0202641	0.981454
1394	Prothioconazole	3	3	3	Good	2.24021	In	1304	0.0773893	0.928176
1344	P-nonylphenol	3	3	3	Good	2.23564	In	1040	0.0496886	0.928972
1674	Triticonazole	3	3	3	Good	2.23446	In	1304	0.0693684	0.935577
1291	Penconazole	3	3	3	Good	2.23371	In	282	0.0659508	0.947199
223	Bithionol	3	3	3	Good	2.23251	In	169	0.0676883	0.899171
692	Ethoxylated p-nonylphenol	3	3	3	Good	2.23134	In	417	0.0415161	0.944538
360	Chlorophacinone	3	3	3	Good	2.22191	In	1017	0.0329846	0.955849
5	(R)-hexaconazole	3	3	3	Good	2.22138	In	1048	0.0634951	0.947084
952	Hexaconazole	3	3	3	Good	2.22138	In	1048	0.0634951	0.947084
1406	Pyraclonil	3	3	3	Good	2.21861	In	77	0.0409909	0.969431
875	Flutianil	3	3	3	Good	2.21758	In	294	0.0209181	0.980397
620	Diphacinone sodium	3	3	3	Good	2.2102	In	732	0.0316412	0.954589
1635	Triaziflam	3	3	3	Good	2.20648	In	294	0.0201805	0.982378
753	Fenpropimorph	3	3	3	Good	2.20453	In	294	0.0201213	0.982675
339	Chlorfenethol	3	3	3	Good	2.20306	In	169	0.080185	0.878567
1512	Spirodiclofen	3	3	3	Good	2.20086	In	931	0.0572633	0.941139
1348	Pretilachlor	3	3	3	Good	2.20036	In	77	0.0447128	0.959054
1470	Rimisoxafen	3	3	3	Good	2.18701	In	77	0.0170489	0.98638
619	Diphacinone	3	3	3	Good	2.18558	In	718	0.0217013	0.96949
348	Chlorfluren methyl	3	3	3	Good	2.18312	In	336	0.0394206	0.948778
1538	Tebuconazole	3	3	3	Good	2.18009	In	1034	0.0999439	0.908533
1401	Pydiflumetofen	3	3	3	Good	2.17832	In	282	0.0361983	0.971016
1513	Spiromesifen	3	3	3	Good	2.17813	In	1097	0.0189068	0.978224
691	Ethoxyfen-ethyl	3	3	3	Good	2.16925	In	1117	0.0858138	0.906388
140	Azaconazole	3	3	3	Good	2.16788	In	62	0.0363734	0.970299
1678	Uniconazole	3	3	3	Good	2.1673	In	1034	0.0934977	0.910589
346	Chlorfluazuron	3	3	3	Good	2.16481	In	282	0.0323175	0.976293
60	Acequinocyl	3	3	3	Good	2.15708	In	457	0.0256257	0.962285
450	Cyclethrin	3	3	3	Good	2.15618	In	1097	0.0210782	0.968314
834	Fluopicolide	3	3	3	Good	2.1535	In	282	0.0366779	0.973559
1626	Triadimenol	3	3	3	Good	2.13982	In	1034	0.0958491	0.908034
960	Huanjunzuo	3	3	3	Good	2.13962	In	1304	0.0760264	0.934897
602	Diniconazole	3	3	3	Good	2.13629	In	404	0.0836646	0.914272
603	Diniconazole-M	3	3	3	Good	2.13629	In	404	0.0836646	0.914272
1255	Nuarimol	3	3	3	Good	2.13559	In	1034	0.0922326	0.919124
1441	Pyriminostrobin	3	3	3	Good	2.13295	In	1004	0.0495688	0.96271
1076	Lithium perfluorooctane sulfonate	3	3	3	Good	2.13267	In	700	0.0274278	0.965267
342	Chlorfenson	3	3	3	Good	2.13129	In	401	0.0725054	0.905068
592	Dimethrin	3	3	3	Good	2.11895	In	636	0.0393605	0.94259
1511	Spirobudifen	3	3	3	Good	2.1178	In	398	0.0669984	0.924303
24	1-decanol	3	3	3	Good	2.11422	In	22	0.113133	0.831495
313	Chlomethoxyfen	3	3	3	Good	2.10967	In	256	0.0192731	0.981515
30	2-(octylthio)ethanol	3	3	3	Good	2.10037	In	1117	0.0907531	0.887395
1288	Parinol	3	3	3	Good	2.0986	In	404	0.0707777	0.934465
1490	Simeconazole	3	3	3	Good	2.09283	In	1304	0.066178	0.945799
1519	Sulcofuron-sodium	3	3	3	Good	2.09251	In	425	0.136976	0.890951
479	Cyproconazole	3	3	3	Good	2.09081	In	1304	0.0712994	0.938009
716	Fenarimol	3	3	3	Good	2.08359	In	404	0.0679099	0.932045
1632	Triarimol	3	3	3	Good	2.08359	In	404	0.0679099	0.932045
1447	Pyrisoxazole	3	3	3	Good	2.08223	In	1217	0.0162843	0.984073
1333	Piperalin	3	3	3	Good	2.07143	In	1175	0.0407183	0.960001
1218	Myclobutanil	3	3	3	Good	2.06498	In	66	0.0500843	0.960447
1435	Pyrifenox	3	3	3	Good	2.06427	In	1175	0.0503133	0.952505
206	Bifenox	3	3	3	Good	2.06384	In	1174	0.0313092	0.973311
227	Brodifacoum	3	3	3	Good	2.05915	In	163	0.0592556	0.910914
967	Imazalil	3	3	3	Good	2.05679	In	1231	0.0603681	0.943187
968	Imazalil nitrate	3	3	3	Good	2.05679	In	1231	0.0603681	0.943187
318	Chloraniformethan	3	3	3	Good	2.04755	In	315	0.0106688	0.990371
496	Decafentin	3	3	3	Good	2.04671	In	701	0.0573239	0.908816
1545	Tecloftalam	3	2	3	Good	2.04035	In	857	0.0742837	0.895081
617	Dioxabenzophos	3	3	3	Good	2.03603	In	1018	0.0350279	0.942159
382	Chlorthal-dimethyl	3	3	3	Good	2.03278	In	481	0.094627	0.849041
1388	Propyzamide	3	3	3	Good	2.03034	In	121	0.0349072	0.96107
1551	Temephos	3	3	3	Good	2.02824	In	1	0.0129254	0.984816
1605	Tiorantraniliprole	3	3	3	Good	2.02539	In	703	0.0571264	0.942245
573	Difethialone	3	3	3	Good	2.02536	In	163	0.0621564	0.891993
421	Copper abietate	3	3	3	Good	2.02475	In	1018	0.0289933	0.954001
784	Flocoumafen	3	3	3	Good	2.01378	In	163	0.074468	0.85324
447	Cybutryne	3	3	3	Good	2.00786	In	315	0.0164483	0.983556
902	Furalane	3	3	3	Good	2.00683	In	164	0.0265027	0.96761
1009	Ipfencarbazone	3	3	3	Good	2.00126	In	575	0.0611735	0.943967
480	Cyprodinil	3	3	3	Good	1.9965	In	1256	0.0204645	0.978357
411	Clomeprop	3	3	3	Good	1.99304	In	1181	0.044788	0.9642
43	2,6-dichloro-N-((4-(trifluoromethyl)phenyl)methyl-benzamide	3	3	3	Good	1.99246	In	703	0.0280363	0.975046
287	Cambendichlor	3	3	3	Good	1.99051	In	847	0.0484395	0.953592
718	Fenazaflor	3	3	3	Good	1.98531	In	575	0.0718455	0.928985
723	Fenchlorazole-ethyl	3	3	3	Good	1.98531	In	575	0.0718455	0.928985
947	Heptopargil	3	3	3	Good	1.98207	In	1256	0.0185673	0.982473
809	Flucofuron	3	3	3	Good	1.98122	In	282	0.0708211	0.954693
879	Fluxametamide	3	3	3	Good	1.98044	In	282	0.0712701	0.947547
546	Diclocymet	3	3	3	Good	1.97934	In	121	0.0244132	0.976792
1202	Mivorilaner	3	3	3	Good	1.97928	In	575	0.0750316	0.923627
2	(E)-2-(2-(2-(2,3-dichlorophenylamino)-6-trifluoromethylpyrimidin-4-yloxymethyl)phenyl)-3-methoxyacrylate	3	3	3	Good	1.9765	In	703	0.0142389	0.985387
878	Fluvalinate	3	3	3	Good	1.97624	In	283	0.0407889	0.963156
1535	Tau-fluvalinate	3	3	3	Good	1.97624	In	283	0.0407889	0.963156
1023	Isocycloseram	3	3	3	Good	1.97558	In	575	0.0775922	0.920838
1694	Zoxamide	3	3	3	Good	1.9742	In	121	0.0366783	0.964282
713	Fenaminstrobin	3	3	3	Good	1.97404	In	1181	0.0339599	0.967435
1456	Quinconazole	3	3	3	Good	1.97345	In	624	0.102666	0.909654
738	Fenoprop-isoctyl	3	3	3	Good	1.97285	In	474	0.0912674	0.867766
377	Chlorpyrifos	3	3	3	Good	1.97093	In	1065	0.056121	0.952722
578	Diflumetorim	3	3	3	Good	1.97072	In	575	0.0505894	0.955065
661	Epoxiconazole	3	3	3	Good	1.96933	In	703	0.0153198	0.984866
861	Fluquinconazole	3	3	3	Good	1.96462	In	18	0.110864	0.88914
549	Diclomezine	3	3	3	Good	1.95657	In	679	0.031551	0.972604
825	Flumetralin	3	3	3	Good	1.95329	In	77	0.0294515	0.972298
1630	Triapenthenol	3	3	3	Good	1.95249	In	1304	0.0611052	0.939693
666	Esfenvalerate	3	3	3	Good	1.95129	In	77	0.0519184	0.952569
773	Fenvalerate	3	3	3	Good	1.95129	In	77	0.0519184	0.952569
1547	Teflubenzuron	3	3	3	Good	1.95043	In	1181	0.0328135	0.964665
98	Ametoctradin	3	3	3	Good	1.94994	In	65	0.0660098	0.928676
1412	Pyranocoumarin	3	3	3	Good	1.94792	In	554	0.0206668	0.975441
1464	Quintozene	3	3	3	Good	1.94623	In	500	0.0984787	0.915698
224	Bixafen	3	3	3	Good	1.94439	In	280	0.066377	0.936731
1236	Nicofluprole	3	3	3	Good	1.94157	In	847	0.11435	0.880035
344	Chlorfenvinphos	3	3	3	Good	1.9402	In	1043	0.11046	0.851819
1439	Pyrimidifen	3	3	3	Good	1.93879	In	575	0.0523533	0.953543
1651	Tridemorph	3	3	3	Good	1.92567	In	1304	0.0777925	0.911398
1274	Oxaziclomefone	3	3	3	Good	1.92482	In	575	0.0445282	0.959808
197	Benzoylprop-ethyl	3	3	3	Good	1.92447	In	1217	0.0418033	0.964098
94	Alpha-endosulfan	3	3	3	Good	1.9241	In	1117	0.0584323	0.927467
202	Beta-endosulfan	3	3	3	Good	1.9241	In	1117	0.0584323	0.927467
651	Endosulfan	3	3	3	Good	1.9241	In	1117	0.0584323	0.927467
797	Fluazinam	3	3	3	Good	1.91727	In	65	0.0416767	0.964439
1317	Phosdiphen	3	3	3	Good	1.91716	In	474	0.102823	0.824951
1324	Phthalide	3	2	3	Good	1.9122	In	22	0.0403828	0.934641
751	Fenpropathrin	3	3	3	Good	1.91185	In	24	0.0123578	0.985885
997	Inpyrfluxam	3	3	3	Good	1.91112	In	679	0.0143752	0.988587
1254	Noviflumuron	3	3	3	Good	1.90959	In	65	0.0506553	0.947218
1409	Pyrafluprole	3	3	3	Good	1.90847	In	325	0.0620734	0.943299
908	Furethrin	3	3	3	Good	1.90458	In	170	0.0221883	0.960855
779	Flamprop-isopropyl	3	3	3	Good	1.89622	In	805	0.025387	0.976366
781	Flamprop-M-isopropyl	3	3	3	Good	1.89622	In	805	0.025387	0.976366
1553	Terallethrin	3	3	3	Good	1.88982	In	1162	0.0175378	0.971751
1077	Lufenuron	3	3	3	Good	1.88915	In	1181	0.0585729	0.942968
35	2,4,5-trichlorophenol	3	3	3	Good	1.88391	In	789	0.0281142	0.960837
468	Cyhalothrin	3	3	3	Good	1.87639	In	646	0.0333893	0.968848
913	Gamma-cyhalothrin	3	3	3	Good	1.87639	In	646	0.0333893	0.968848
1065	Lambda-cyhalothrin	3	3	3	Good	1.87639	In	646	0.0333893	0.968848
461	Cyenopyrafen	3	3	3	Good	1.87534	In	24	0.0083432	0.992992
1055	Kadethrin	3	3	3	Good	1.87121	In	1018	0.0149213	0.975899
566	Difenacoum	3	3	3	Good	1.86234	In	672	0.09482	0.883563
810	Flucycloxuron	3	3	3	Good	1.86111	In	805	0.0358386	0.96545
1343	Plifenate	3	3	3	Good	1.85213	In	398	0.0751466	0.90992
1142	Metamifop	3	3	3	Good	1.85096	In	646	0.032234	0.972173
1268	Oxadiargyl	3	3	3	Good	1.85011	In	1181	0.0345757	0.963893
693	Ethoxyquin	3	3	3	Good	1.84978	In	1256	0.00637957	0.994725
1283	Oxyfluorfen	3	3	3	Good	1.84695	In	121	0.0299372	0.978819
1269	Oxadiazon	3	3	3	Good	1.8454	In	1065	0.0368023	0.961463
364	Chloropropylate	3	3	3	Good	1.8428	In	1170	0.0642781	0.892698
1428	Pyridaben	3	3	3	Good	1.84231	In	805	0.0312038	0.974487
808	Fluchlordiniliprole	3	3	3	Good	1.83527	In	703	0.0380693	0.963067
1041	Isopyrimol	3	3	3	Good	1.83019	In	759	0.0379501	0.963105
449	Cyclaniliprole	3	3	3	Good	1.82867	In	575	0.0324124	0.972257
306	Carfentrazone-ethyl	3	3	3	Good	1.82087	In	646	0.0272594	0.971949
1562	Tetflupyrolimet	3	3	3	Good	1.82082	In	616	0.00571918	0.995403
818	Flufenoxuron	3	3	3	Good	1.82044	In	805	0.0235013	0.977863
1567	Tetramethrin	3	3	3	Good	1.81927	In	121	0.0130859	0.984881
935	Halofenozide	3	3	3	Good	1.81819	In	646	0.029289	0.972472
1561	Tetcyclacis	3	3	3	Good	1.8135	In	731	0.0433401	0.951815
1372	Propanil	3	3	3	Good	1.8098	In	272	0.010521	0.989452
191	Benzofenap	3	3	3	Good	1.80507	In	805	0.0332668	0.970565
1197	Metyltetraprole	3	3	3	Good	1.80499	In	280	0.0274164	0.971843
1463	Quintiofos	3	3	3	Good	1.80407	In	757	0.0225054	0.977486
70	Acifluorfen-methyl	3	3	3	Good	1.80385	In	679	0.024886	0.975603
1546	Tecnazene	3	3	3	Good	1.80169	In	18	0.0952976	0.907026
391	Cinidon-ethyl	3	3	3	Good	1.80166	In	1007	0.0401434	0.969904
868	Fluroxypyr-meptyl	3	3	3	Good	1.79775	In	121	0.0253795	0.973418
1028	Isoflucypram	3	3	3	Good	1.79703	In	280	0.0214038	0.978521
1233	Neburon	3	3	3	Good	1.79518	In	1181	0.0295572	0.973265
465	Cyhalodiamide	3	3	3	Good	1.79266	In	280	0.0228599	0.976503
221	Bistrifluron	3	3	3	Good	1.79187	In	805	0.0263991	0.979946
658	EPN	3	3	3	Good	1.79178	In	607	0.0126416	0.989619
711	Fenamidone	3	3	3	Good	1.79145	In	616	0.0193028	0.981678
141	Azafenidin	3	3	3	Good	1.78456	In	1065	0.0270657	0.978011
1307	Phenobenzuron	3	3	3	Good	1.78401	In	1007	0.0293853	0.981645
1446	Pyriproxyfen	3	3	3	Good	1.78374	In	617	0.00585587	0.994976
737	Fenoprop-butyl	3	3	3	Good	1.78222	In	1043	0.115294	0.820148
1417	Pyraziflumid	3	3	3	Good	1.77892	In	275	0.0197557	0.979638
1516	Spiroxamine	3	3	3	Good	1.7779	In	1216	0.0136601	0.986689
1655	Trifenofos	3	3	3	Good	1.77485	In	474	0.10625	0.839295
616	Diofenolan	3	3	3	Good	1.77416	In	1031	0.0247334	0.963457
485	Cypyrafluone	3	3	3	Good	1.77411	In	1217	0.0307543	0.9704
735	Fenoprop-butometyl	3	3	3	Good	1.77342	In	474	0.108327	0.843544
323	Chlorazifop propargyl	3	3	3	Good	1.77214	In	616	0.0152094	0.984802
1402	Pyflubumide	3	3	3	Good	1.77151	In	1216	0.0182219	0.980719
1225	Naftalofos	3	3	3	Good	1.7708	In	587	0.00651832	0.99397
265	Buthiobate	3	3	3	Good	1.7693	In	121	0.0119381	0.988519
1140	Metaldehyde	3	3	3	Good	1.76915	In	454	0.0235923	0.966386
836	Fluopyram	3	3	3	Good	1.76657	In	646	0.0250724	0.977297
455	Cycloprothrin	3	3	3	Good	1.76633	In	1216	0.0119934	0.988047
1414	Pyrapropoyne	3	3	3	Good	1.76607	In	619	0.024782	0.972356
710	Famoxadone	3	3	3	Good	1.76527	In	275	0.0160979	0.98544
320	Chloranocryl	3	3	3	Good	1.76459	In	587	0.0127744	0.98897
750	Fenpirithrin	3	3	3	Good	1.76398	In	617	0.00790299	0.991689
851	Flupoxam	3	3	3	Good	1.76259	In	805	0.0304621	0.973114
130	Anisuron	3	3	3	Good	1.75849	In	646	0.0382253	0.963643
226	Boscalid	3	3	3	Good	1.75804	In	121	0.00836347	0.991952
798	Fluazolate	3	3	3	Good	1.75638	In	805	0.0252555	0.972898
865	Fluridone	3	3	3	Good	1.75534	In	1216	0.00909164	0.990201
478	Cyprazine	3	3	3	Good	1.75409	In	1216	0.0137015	0.987721
665	Erbon	3	3	3	Good	1.75393	In	474	0.0993826	0.837026
1541	Tebufloquin	3	3	3	Good	1.7521	In	607	0.0144481	0.985789
870	Flurtamone	3	3	3	Good	1.75181	In	275	0.016519	0.986063
154	Barban	3	3	3	Good	1.75088	In	805	0.0532211	0.945814
596	Dimethylvinphos	3	3	3	Good	1.75073	In	474	0.0892826	0.861702
1523	Sulfluramid	3	3	3	Good	1.7503	In	646	0.012382	0.988531
1183	Metobenzuron	3	3	3	Good	1.74942	In	275	0.0136859	0.988592
1332	Pinoxaden	3	3	3	Good	1.74941	In	1216	0.0144563	0.983969
1586	Thifluzamide	3	3	3	Good	1.74189	In	121	0.0181629	0.980237
1085	Malonoben	3	3	3	Good	1.74184	In	1304	0.062191	0.93266
477	Cyphenothrin	3	3	3	Good	1.74128	In	1216	0.0101462	0.988206
93	Alpha-cypermethrin	3	3	3	Good	1.73835	In	617	0.0101388	0.990556
201	Beta-cypermethrin	3	3	3	Good	1.73835	In	617	0.0101388	0.990556
474	Cypermethrin	3	3	3	Good	1.73835	In	617	0.0101388	0.990556
1572	Theta-cypermethrin	3	3	3	Good	1.73835	In	617	0.0101388	0.990556
1692	Zeta-cypermethrin	3	3	3	Good	1.73835	In	617	0.0101388	0.990556
390	Chromafenozide	3	3	3	Good	1.73824	In	587	0.00806031	0.992235
817	Flufenoxadiazam	3	3	3	Good	1.73788	In	1216	0.00917646	0.989712
1443	Pyrimorph	3	3	3	Good	1.73648	In	1019	0.0203677	0.981506
1064	Lactofen	3	3	3	Good	1.73496	In	541	0.0383404	0.961202
1580	Thidiazimin	3	3	3	Good	1.73189	In	1065	0.0185552	0.987344
1603	Tigolaner	3	3	3	Good	1.73189	In	282	0.0558645	0.962241
866	Flurochloridone	3	3	3	Good	1.73077	In	1216	0.00806396	0.991613
1620	Trans-flurochloridone	3	3	3	Good	1.73077	In	1216	0.00806396	0.991613
1479	Sedaxane	3	3	3	Good	1.73039	In	646	0.013653	0.989874
954	Hexaflumuron	3	3	3	Good	1.72279	In	1181	0.0102453	0.991759
785	Flometoquin	3	3	3	Good	1.72075	In	587	0.00953579	0.990623
525	Dichlobenil	3	3	3	Good	1.72001	In	1085	0.0440126	0.957346
1005	Ioxynil	3	3	3	Good	1.71938	In	1048	0.0848082	0.935169
456	Cyclopyrimorate	3	3	3	Good	1.71617	In	121	0.0145776	0.98798
1660	Triflumezopyrim	3	3	3	Good	1.71613	In	619	0.0252759	0.978387
1532	Sulprofos	3	3	3	Good	1.71583	In	784	0.0114773	0.980774
358	Chlorobenzilate	3	3	3	Good	1.71442	In	1170	0.0683856	0.892429
1650	Tricyclazole	3	3	3	Good	1.71436	In	121	0.0244393	0.976778
435	Coumoxystrobin	3	3	3	Good	1.71318	In	110	0.0403134	0.937358
953	Hexadecanoic acid	3	3	3	Good	1.71309	In	467	0.0479859	0.928293
1481	Sesamex	3	3	3	Good	1.71068	In	454	0.00352543	0.995245
1298	Pentanochlor	3	3	3	Good	1.70768	In	1085	0.0395481	0.953845
85	Allethrin	3	3	3	Good	1.70725	In	363	0.0118945	0.981798
209	Bioallethrin	3	3	3	Good	1.70725	In	363	0.0118945	0.981798
1474	S-bioallethrin	3	3	3	Good	1.70725	In	363	0.0118945	0.981798
1347	Prallethrin	3	3	3	Good	1.70706	In	363	0.0120136	0.981525
1352	Prochloraz	3	3	3	Good	1.70706	In	363	0.0120136	0.981525
363	Chloroprallethrin	3	3	3	Good	1.7062	In	363	0.0125163	0.980473
307	Carpropamid	3	3	3	Good	1.70101	In	619	0.0245452	0.97535
483	Cypromid	3	3	3	Good	1.70002	In	646	0.0312611	0.979426
637	Dithiopyr	3	3	3	Good	1.69949	In	275	0.0156518	0.983579
550	Dicloran	3	3	3	Good	1.69548	In	607	0.0198197	0.984709
319	Chloranil	3	2	3	Good	1.69456	In	697	0.0524436	0.882809
1437	Pyriftalid	3	3	3	Good	1.69226	In	1216	0.00625685	0.993628
650	Empenthrin	3	3	3	Good	1.69091	In	511	0.0413042	0.944353
1075	Linuron	3	3	3	Good	1.68969	In	1019	0.0119971	0.988146
742	Fenoxanil	3	3	3	Good	1.68919	In	607	0.00737453	0.99281
638	Diuron	3	3	3	Good	1.68878	In	275	0.0183565	0.980433
153	Azoxystrobin	3	3	3	Good	1.68397	In	1216	0.0138422	0.989652
569	Difenopenten-ethyl	3	3	3	Good	1.68334	In	322	0.0143068	0.977368
1263	Orbencarb	3	3	3	Good	1.68285	In	805	0.0656898	0.931849
843	Fluoromidine	3	3	3	Good	1.68224	In	1217	0.0439935	0.960002
232	Bromadiolone	3	3	3	Good	1.68102	In	672	0.048777	0.918627
1543	Tebutam	3	3	3	Good	1.6791	In	618	0.0164224	0.981116
1051	Isoxapyrifop	3	3	3	Good	1.67823	In	1065	0.0258506	0.975807
529	Dichlone	3	3	3	Good	1.67808	In	988	0.0670651	0.893075
609	Dinopenton	3	3	3	Good	1.67322	In	646	0.0100365	0.99183
73	Acrinathrin	3	3	3	Good	1.67086	In	1216	0.011256	0.987874
895	Fospirate	3	3	3	Good	1.67056	In	1216	0.0132509	0.984717
1040	Isopyrazam	3	3	3	Good	1.67044	In	861	0.0222839	0.977612
1355	Prodiamine	3	3	3	Good	1.66816	In	275	0.0177209	0.982242
1647	Triclopyr-butotyl	3	3	3	Good	1.66681	In	861	0.0275241	0.968655
645	Dufulin	3	3	3	Good	1.6656	In	349	0.0143001	0.985817
1335	Piperonyl cyclonene	3	3	3	Good	1.66496	In	345	0.0293013	0.960937
643	Dodine	3	3	3	Good	1.66369	In	1034	0.113937	0.886182
1219	Myclobutanil hydrochloride	3	3	3	Good	1.66212	In	759	0.0563033	0.942393
500	Deltamethrin	3	3	3	Good	1.6617	In	95	0.0123115	0.986994
365	Chlorothalonil	3	3	3	Good	1.66006	In	65	0.104882	0.884203
1663	Trifluralin	3	3	3	Good	1.65979	In	601	0.0212046	0.980869
780	Flamprop-methyl	3	3	3	Good	1.65961	In	619	0.047116	0.949974
782	Flamprop-M-methyl	3	3	3	Good	1.65961	In	619	0.047116	0.949974
166	Benfluralin	3	3	3	Good	1.65952	In	601	0.0209968	0.98118
805	Fluchloralin	3	3	3	Good	1.65932	In	601	0.0208431	0.981418
880	Fluxapyroxad	3	3	3	Good	1.6581	In	95	0.0107807	0.989644
1408	Pyraflufen-ethyl	3	3	3	Good	1.65797	In	607	0.00986539	0.990737
1327	Picloram-isoctyl	3	3	3	Good	1.65476	In	285	0.0147923	0.984602
748	Fenpiclonil	3	3	3	Good	1.65465	In	65	0.0145848	0.986401
1628	Tri-allate	3	3	3	Good	1.65438	In	325	0.0773526	0.923777
413	Cloproxydim	3	3	3	Good	1.65425	In	67	0.0485027	0.952213
1329	Picolinafen	3	3	3	Good	1.6539	In	95	0.0102257	0.989849
1648	Triclopyricarb	3	3	3	Good	1.65215	In	738	0.0171204	0.983483
409	Clofop-isobutyl	3	3	3	Good	1.65151	In	185	0.0439175	0.940873
576	Diflufenican	3	3	3	Good	1.65105	In	395	0.00985544	0.989597
1476	Seboctylamine	3	3	3	Good	1.65075	In	404	0.0639408	0.927466
1436	Pyrifluquinazon	3	3	3	Good	1.64993	In	619	0.0233279	0.977242
605	Dinobuton	3	3	3	Good	1.64979	In	285	0.0176463	0.979465
819	Flufenoxystrobin	3	3	3	Good	1.64948	In	185	0.0378465	0.953257
218	Bispyribac-sodium	3	3	3	Good	1.64763	In	1019	0.0209043	0.9782
434	Coumithoate	3	3	3	Good	1.64685	In	345	0.0217259	0.968746
366	Chlorotoluene	3	3	3	Good	1.64279	In	429	0.00961595	0.98512
559	Didecyldimethylammonium chloride	3	3	3	Good	1.642	In	489	0.0780767	0.933431
1422	Pyrazoxyfen	3	3	3	Good	1.64199	In	280	0.0157423	0.985992
243	Bromoxynil	3	3	3	Good	1.64194	In	1048	0.0952094	0.91714
432	Coumatetralyl	3	3	3	Good	1.64121	In	329	0.0184503	0.971551
1534	Swep	3	3	3	Good	1.64078	In	1071	0.0213273	0.982612
800	Flubeneteram	3	3	3	Good	1.63611	In	619	0.028895	0.977484
1292	Pencycuron	3	3	3	Good	1.63546	In	861	0.0250834	0.97479
1120	Mefenacet	3	3	3	Good	1.63531	In	1019	0.0280803	0.971231
1311	Phenylmercury chloride	3	3	3	Good	1.63289	In	429	0.00889916	0.987866
1354	Procymidone	3	3	3	Good	1.63245	In	759	0.0519753	0.935597
208	Binapacryl	3	3	3	Good	1.62983	In	1071	0.0242561	0.979395
1325	Picarbutrazox	3	3	3	Good	1.62962	In	395	0.00691744	0.99228
1629	Triamiphos	3	3	3	Good	1.62942	In	618	0.011622	0.987098
766	Fenthion-ethyl	3	3	3	Good	1.62909	In	744	0.00862182	0.986466
1229	Naproanilide	3	3	3	Good	1.62808	In	395	0.00747443	0.992126
1050	Isoxaflutole	3	3	3	Good	1.6277	In	1065	0.0415032	0.956737
467	Cyhalofop-butyl	3	3	3	Good	1.62729	In	738	0.0140517	0.986809
775	Ferimzone	3	3	3	Good	1.62422	In	95	0.00818433	0.991924
1299	Penthiopyrad	3	3	3	Good	1.62377	In	1177	0.00990794	0.988749
1578	Thiazopyr	3	3	3	Good	1.62214	In	395	0.00740165	0.991482
1385	Propyl isome	3	3	3	Good	1.62089	In	322	0.0254961	0.961243
157	Benalaxyl	3	3	3	Good	1.6195	In	1019	0.0116145	0.989984
158	Benalaxyl-M	3	3	3	Good	1.6195	In	1019	0.0116145	0.989984
433	Coumethoxystrobin	3	3	3	Good	1.61941	In	223	0.0331297	0.943594
862	Flurazole	3	3	3	Good	1.61839	In	1019	0.0171452	0.982998
1418	Pyrazolynate	3	3	3	Good	1.61415	In	89	0.0426789	0.963416
1027	Isofetamid	3	3	3	Good	1.61383	In	1019	0.0323392	0.966633
869	Flurprimidol	3	3	3	Good	1.61182	In	1304	0.0698704	0.947712
188	Benzfendizone	3	3	3	Good	1.61006	In	1019	0.0291783	0.968165
107	Amidothioate	3	3	3	Good	1.60907	In	89	0.0382915	0.964397
256	Buprofezin	3	3	3	Good	1.60775	In	1071	0.0309277	0.976874
151	Azothoate	3	3	3	Good	1.60763	In	805	0.0270315	0.971751
642	Dodemorph	3	3	3	Good	1.60747	In	541	0.0184268	0.981492
213	Bipyrazone	3	3	3	Good	1.60353	In	805	0.0492574	0.950914
82	Aldimorph	3	3	3	Good	1.6033	In	1304	0.0816433	0.905715
905	Furametpyr	3	3	3	Good	1.60247	In	67	0.0447742	0.958493
787	Florasulam	3	3	3	Good	1.60205	In	67	0.0499965	0.944402
815	Flufenacet	3	3	3	Good	1.60139	In	618	0.0164442	0.984408
725	Fenclorim	3	3	3	Good	1.59817	In	1216	0.0177068	0.980066
378	Chlorpyrifos-methyl	3	3	3	Good	1.59759	In	1007	0.0356085	0.965918
71	Acifluorfen-sodium	3	3	3	Good	1.59681	In	861	0.0164975	0.985953
872	Flusulfamide	3	3	3	Good	1.59637	In	1065	0.0330692	0.966191
234	Bromfenvinfos	3	3	3	Good	1.5953	In	1117	0.111292	0.859086
790	Florylpicoxamid	3	3	3	Good	1.59337	In	1019	0.024571	0.973524
514	Di-allate	3	3	3	Good	1.59329	In	703	0.0891949	0.91134
278	Cafenstrole	3	3	3	Good	1.59311	In	1019	0.0249885	0.972248
195	Benzoximate	3	3	3	Good	1.59245	In	1062	0.0232499	0.972676
116	Amisulbrom	3	3	3	Good	1.59239	In	1085	0.040189	0.959459
194	Benzovindiflupyr	3	3	3	Good	1.5898	In	619	0.0321871	0.970527
882	Folpet	3	3	3	Good	1.585	In	67	0.0457979	0.948515
551	Dicloromezotiaz	3	3	3	Good	1.58492	In	575	0.0700258	0.936397
1467	Rabenzazole	3	3	3	Good	1.58471	In	108	0.0138554	0.986176
200	Beta-cyfluthrin	3	3	3	Good	1.58107	In	395	0.00981148	0.990189
464	Cyfluthrin	3	3	3	Good	1.58107	In	395	0.00981148	0.990189
1624	Triacontanol	3	3	3	Good	1.58038	In	1105	0.0923745	0.777972
721	Fenbutatin oxide	3	2	3	Good	1.57857	In	649	0.0502796	0.90333
1230	Napropamide	3	3	3	Good	1.57658	In	541	0.0157004	0.985261
1231	Napropamide-M	3	3	3	Good	1.57658	In	541	0.0157004	0.985261
321	Chlorantraniliprole	3	3	3	Good	1.57645	In	89	0.0236531	0.975178
789	Florpyrauxifen-benzyl	3	3	3	Good	1.57597	In	601	0.0271092	0.97608
1336	Piperonyl sulfoxide	3	3	3	Good	1.57534	In	511	0.018651	0.973412
732	Fenmezoditiaz	3	3	3	Good	1.57366	In	1085	0.0423664	0.953772
1300	Pentoxazone	3	3	3	Good	1.573	In	1126	0.0241084	0.977522
736	Fenoprop-butotyl	3	3	3	Good	1.57199	In	474	0.0837766	0.863274
754	Fenpyrazamine	3	3	3	Good	1.57197	In	275	0.0175839	0.980362
1168	Methoxyfenozide	3	3	3	Good	1.57104	In	396	0.00512822	0.99419
384	Chlorthiamid	3	3	3	Good	1.57062	In	1181	0.0323651	0.968079
622	Diphenylamine	3	3	3	Good	1.57008	In	95	0.0133738	0.985371
1106	Mebenil	3	3	3	Good	1.5689	In	275	0.0173354	0.983464
273	Buturon	3	3	3	Good	1.56811	In	619	0.0227216	0.975979
1301	Perfluidone	3	3	3	Good	1.56761	In	541	0.0454975	0.951067
876	Flutolanil	3	3	3	Good	1.56548	In	1177	0.013534	0.987046
1019	Isobornyl thiocyanoacetate	3	3	3	Good	1.56465	In	108	0.0231696	0.972917
1244	Nitrothal-isopropyl	3	3	3	Good	1.56441	In	349	0.00948989	0.990923
1217	Mucochloric anhydride	3	2	3	Good	1.56309	In	1105	0.0580609	0.876483
799	Flubendiamide	3	3	3	Good	1.56176	In	108	0.00982369	0.990019
29	1-octyl-2-pyrrolidone	3	3	3	Good	1.56175	In	575	0.0478696	0.954893
621	Diphenamid	3	3	3	Good	1.56168	In	275	0.0160815	0.984179
189	Benzipram	3	3	3	Good	1.56163	In	285	0.0154886	0.986864
791	Fluacrypyrim	3	3	3	Good	1.56076	In	275	0.0182808	0.980956
1555	Terbucarb	3	3	3	Good	1.55552	In	395	0.0189987	0.98166
1203	Modoflaner	3	3	3	Good	1.55551	In	108	0.0116982	0.986425
54	2-phenylphenol	3	3	3	Good	1.55356	In	783	0.00574386	0.990483
1451	Pyroxsulam	3	3	3	Good	1.55132	In	541	0.0451897	0.953654
481	Cyproflanilide	3	3	3	Good	1.55006	In	1304	0.0996981	0.892659
739	Fenoprop-methyl	3	3	3	Good	1.55005	In	474	0.0684653	0.87395
1604	Tiocarbazil	3	3	3	Good	1.55004	In	601	0.0180416	0.982615
1220	Myclozolin	3	3	3	Good	1.54943	In	111	0.0708805	0.943338
1253	Novaluron	3	3	3	Good	1.54931	In	647	0.0178681	0.97991
12	1,1-bis(4-chlorophenyl)-2-ethoxyethanol	3	3	3	Good	1.54807	In	334	0.0379906	0.936494
531	Dichlorophen	3	3	3	Good	1.54669	In	334	0.0617837	0.908301
114	Aminopyrofen	3	3	3	Good	1.54364	In	23	0.011626	0.987435
1205	Momfluorothrin	3	3	3	Good	1.5434	In	23	0.0102356	0.988716
535	Dichlorprop-isoctyl	3	3	3	Good	1.54104	In	474	0.10161	0.84992
539	Dichlorprop-isoctyl	3	3	3	Good	1.54104	In	474	0.10161	0.84992
756	Fenpyroximate	3	3	3	Good	1.5373	In	23	0.00741978	0.992879
1637	Triazoxide	3	3	3	Good	1.53721	In	1085	0.0552112	0.935971
79	Alachlor	3	3	3	Good	1.53483	In	601	0.0400082	0.958641
1465	Quintrione	3	3	3	Good	1.53475	In	111	0.0401634	0.953546
470	Cymiazol	3	3	3	Good	1.53385	In	64	0.0264945	0.972645
1119	Medinoterb acetate	3	3	3	Good	1.53299	In	396	0.023562	0.972479
1617	Tralocythrin	3	3	3	Good	1.53254	In	618	0.0125654	0.986697
743	Fenoxaprop-ethyl	3	3	3	Good	1.53099	In	1071	0.0178715	0.982286
745	Fenoxaprop-P-ethyl	3	3	3	Good	1.53099	In	1071	0.0178715	0.982286
1169	Methoxyphenone	3	3	3	Good	1.5307	In	110	0.00960648	0.98589
1208	Monolinuron	3	3	3	Good	1.52922	In	278	0.0239765	0.976991
538	Dichlorprop-P-etexyl	3	3	3	Good	1.52872	In	474	0.101527	0.842936
542	Dichlorprop-P-etexyl	3	3	3	Good	1.52872	In	474	0.101527	0.842936
148	Azobenzene	3	3	3	Good	1.52843	In	25	0.0084237	0.990314
1259	Octhilinone	3	3	3	Good	1.52831	In	575	0.041871	0.964745
331	Chlordimeform	3	3	3	Good	1.52781	In	1062	0.0323073	0.969511
332	Chlordimeform hydrochloride	3	3	3	Good	1.52781	In	1062	0.0323073	0.969511
606	Dinocap	3	3	3	Good	1.52693	In	575	0.0807453	0.933193
1132	Meptyldinocap	3	3	3	Good	1.52693	In	575	0.0807453	0.933193
1137	Metaflumizone	3	3	3	Good	1.52685	In	1177	0.0155883	0.984574
1358	Profluralin	3	3	3	Good	1.52371	In	738	0.0106363	0.9905
236	Bromobutide	3	3	3	Good	1.52368	In	396	0.0125014	0.987701
463	Cyflumetofen	3	3	3	Good	1.52337	In	396	0.0157343	0.98453
740	Fenoprop-potassium	3	3	3	Good	1.52315	In	138	0.12728	0.822928
536	Dichlorprop-methyl	3	3	3	Good	1.52074	In	491	0.0740794	0.90253
540	Dichlorprop-methyl	3	3	3	Good	1.52074	In	491	0.0740794	0.90253
1390	Prosulfocarb	3	3	3	Good	1.51918	In	533	0.0574263	0.945207
899	Fufenozide	3	3	3	Good	1.51886	In	738	0.00703622	0.992537
1411	Pyrametostrobin	3	3	3	Good	1.51794	In	108	0.0234911	0.977528
595	Dimethyl(4-piperidinocarbonyloxy-2,5-xylyl)sulfonium toluene-4-sulfonate	3	3	3	Good	1.51754	In	618	0.0228699	0.975935
840	Fluorodifen	3	3	3	Good	1.51551	In	619	0.0241433	0.97713
1004	Iofensulfuron sodium	3	3	3	Good	1.5151	In	108	0.0244436	0.977145
648	Eglinazine	3	3	3	Good	1.51483	In	237	0.0148567	0.987072
1425	Pyribencarb	3	3	3	Good	1.51249	In	47	0.0315745	0.975196
1675	Tritosulfuron	3	3	3	Good	1.51204	In	108	0.0188124	0.978326
1618	Tralomethrin	3	3	3	Good	1.5119	In	108	0.0132168	0.985755
1330	Picoxystrobin	3	3	3	Good	1.51171	In	396	0.0172993	0.983119
127	Ancymidol	3	3	3	Good	1.51081	In	199	0.0426473	0.95836
1101	MCPA-methyl	3	3	3	Good	1.51012	In	185	0.047037	0.939442
367	Chlorotoluron	3	3	3	Good	1.50969	In	287	0.0361491	0.96644
912	Furyloxyfen	3	3	3	Good	1.50963	In	424	0.0237248	0.976013
1189	Metosulam	3	3	3	Good	1.50458	In	89	0.0477918	0.957039
552	Diclosulam	3	3	3	Good	1.5041	In	89	0.0394804	0.961294
488	Daimuron	3	3	3	Good	1.5027	In	618	0.0149759	0.98265
238	Bromofenoxim	3	3	3	Good	1.50254	In	108	0.0186399	0.9803
760	Fenson	3	3	3	Good	1.50244	In	324	0.0227104	0.975625
345	Chlorfluazole	3	3	3	Good	1.50052	In	441	0.10995	0.901169
454	Cycloprate	3	3	3	Good	1.49881	In	1035	0.073852	0.888977
624	Dipropalin	3	3	3	Good	1.49834	In	619	0.0210382	0.981089
1320	Phosnichlor	3	3	3	Good	1.49809	In	662	0.0379561	0.970308
615	Dinoterb acetate	3	3	3	Good	1.49652	In	450	0.00953855	0.990403
385	Chlorthion	3	3	3	Good	1.49618	In	662	0.0358728	0.97315
1013	Iprodione	3	3	3	Good	1.49348	In	654	0.0615081	0.936035
387	Chlozolinate	3	3	3	Good	1.49274	In	654	0.0624677	0.936119
225	Bixlozone	3	3	3	Good	1.49188	In	1062	0.0396314	0.960559
1097	MCPA-ethyl	3	3	3	Good	1.49005	In	185	0.0571873	0.924259
1399	Prynachlor	3	3	3	Good	1.48959	In	120	0.0252929	0.97316
438	Crotamiton	3	3	3	Good	1.48928	In	120	0.026643	0.970749
1407	Pyraclostrobin	3	3	3	Good	1.48657	In	108	0.022752	0.974189
1036	Isopropalin	3	3	3	Good	1.4863	In	601	0.0228337	0.978434
317	Chloramben-ammonium	3	3	3	Good	1.48603	In	424	0.026129	0.972087
1049	Isoxadifen ethyl	3	3	3	Good	1.48451	In	647	0.0286225	0.971851
826	Flumetsulam	3	3	3	Good	1.48389	In	994	0.027663	0.975002
439	Cumyluron	3	3	3	Good	1.48379	In	108	0.0234282	0.973302
1656	Trifloxystrobin	3	3	3	Good	1.48132	In	108	0.0232534	0.977787
301	Carbophenothion	3	3	3	Good	1.48042	In	405	0.0492069	0.924333
1556	Terbuchlor	3	3	3	Good	1.47848	In	89	0.0255193	0.977374
292	Carbanolate	3	3	3	Good	1.47313	In	287	0.0281904	0.974822
1294	Penflufen	3	3	3	Good	1.47234	In	23	0.0134255	0.984833
327	Chlorbromuron	3	3	3	Good	1.47106	In	618	0.0215298	0.978322
1122	Mefenpyr diethyl	3	3	3	Good	1.4706	In	982	0.00949369	0.990857
1389	Proquinazid	3	3	3	Good	1.46919	In	92	0.0174747	0.983556
943	Haloxyfop-sodium	3	3	3	Good	1.46822	In	1126	0.0281207	0.973114
764	Fenthion	3	3	3	Good	1.46808	In	686	0.0239663	0.961644
655	Enoxastrobin	3	3	3	Good	1.46745	In	1062	0.0239559	0.974217
565	Diethyltoluamide	3	3	3	Good	1.46713	In	92	0.0228378	0.979858
1160	Methiotepa	3	3	3	Good	1.46698	In	1034	0.0816242	0.923699
104	Amidochlor	3	3	3	Good	1.46501	In	534	0.0201082	0.98587
1369	Propachlor	3	3	3	Good	1.46481	In	92	0.0212358	0.981392
894	Fosmethilan	3	3	3	Good	1.46429	In	424	0.0155179	0.983665
548	Diclofop-methyl	3	3	3	Good	1.46286	In	491	0.0884133	0.888336
1331	Pindone	3	3	3	Good	1.46237	In	187	0.0255494	0.95439
328	Chlorbufam	3	3	3	Good	1.46162	In	618	0.0239308	0.974775
131	Aramite	3	3	3	Good	1.45979	In	1171	0.0224835	0.962341
557	Dicyclonon	3	3	3	Good	1.45976	In	67	0.0281153	0.975189
258	Butafenacil	3	3	3	Good	1.4592	In	1126	0.034063	0.965813
842	Fluoroimide	3	3	3	Good	1.45879	In	601	0.0139432	0.985418
248	Bromuconazole	3	3	3	Good	1.4587	In	441	0.119393	0.871287
1186	Metolachlor	3	3	3	Good	1.45691	In	534	0.0125001	0.991981
1495	S-metolachlor	3	3	3	Good	1.45691	In	534	0.0125001	0.991981
1424	Pyribambenz-propyl	3	3	3	Good	1.45596	In	108	0.0123621	0.986848
567	Difenoconazole	3	3	3	Good	1.45545	In	441	0.118329	0.874293
1433	Pyridate	3	3	3	Good	1.45538	In	1039	0.0733473	0.92104
1434	Pyridinitril	3	3	3	Good	1.45538	In	1039	0.0733473	0.92104
977	Imazaquin ammonium	3	3	3	Good	1.45516	In	67	0.0227787	0.974735
979	Imazaquin sodium	3	3	3	Good	1.45516	In	67	0.0227787	0.974735
156	Beflubutamid	3	3	3	Good	1.45511	In	92	0.0109111	0.989025
907	Furconazole	3	3	3	Good	1.45495	In	441	0.118702	0.8743
1537	TCA-ethadyl	3	3	3	Good	1.45488	In	641	0.0249373	0.956735
582	Dimepiperate	3	3	3	Good	1.45441	In	1069	0.0283977	0.974308
1462	Quinoxyfen	3	3	3	Good	1.45312	In	65	0.119676	0.872317
1689	Xylene	3	3	3	Good	1.45271	In	385	0.0125775	0.981235
169	Benodanil	3	3	3	Good	1.45265	In	108	0.0162355	0.985001
763	Fenthiaprop ethyl	3	3	3	Good	1.44984	In	424	0.0194238	0.979869
794	Fluazifop-butyl	3	3	3	Good	1.44983	In	108	0.018381	0.981513
796	Fluazifop-P-butyl	3	3	3	Good	1.44983	In	108	0.018381	0.981513
1212	Monuron	3	3	3	Good	1.44826	In	278	0.0142689	0.986559
9	1,1,1,2-tetrachloroethane	3	3	3	Good	1.44729	In	347	0.0100037	0.984911
608	Dinofenate	3	3	3	Good	1.44719	In	64	0.0219859	0.977152
1688	Xylachlor	3	3	3	Good	1.44707	In	534	0.0209707	0.977846
1054	Jiajizengxiaolin	3	3	3	Good	1.44649	In	659	0.0305072	0.953559
874	Fluthiacet-methyl	3	3	3	Good	1.44429	In	1071	0.0231315	0.97849
1045	Isoval	3	3	3	Good	1.44356	In	1138	0.0275896	0.965189
57	8-hydroxyquinoline	3	3	3	Good	1.44338	In	199	0.0811181	0.923862
881	Fluxofenim	3	3	3	Good	1.44337	In	1251	0.0465373	0.957059
1666	Trifopsime	3	3	3	Good	1.44211	In	64	0.0234688	0.975552
406	Clofentezine	3	3	3	Good	1.44106	In	270	0.105159	0.886699
705	Etinofen	3	3	3	Good	1.4398	In	238	0.0234681	0.981579
185	Benzamacril	3	3	3	Good	1.43911	In	632	0.025687	0.977695
1423	Pyribambenz-isopropyl	3	3	3	Good	1.43849	In	1287	0.0133557	0.98884
1116	Mecoprop-P isobutyl	3	3	3	Good	1.43759	In	839	0.0492621	0.921702
1361	Proglinazine	3	3	3	Good	1.43758	In	238	0.0120354	0.990167
1192	Metrafenone	3	3	3	Good	1.4342	In	322	0.0260374	0.960595
822	Flufenpyr-ethyl	3	3	3	Good	1.43365	In	647	0.0372308	0.966805
634	Disul-sodium	3	3	3	Good	1.4331	In	138	0.0954061	0.844501
835	Fluopimomide	3	3	3	Good	1.4331	In	647	0.0329318	0.969093
271	Butralin	3	3	3	Good	1.43297	In	450	0.0127427	0.985681
946	Heptenophos	3	3	3	Good	1.43204	In	483	0.0324222	0.946297
936	Halosafen	3	3	3	Good	1.43129	In	1126	0.0306156	0.97113
811	Flucythrinate	3	3	3	Good	1.43017	In	450	0.0164059	0.982179
492	DCIP	3	3	3	Good	1.4296	In	212	0.0279833	0.952667
244	Bromoxynil-butanoate	3	3	3	Good	1.42701	In	982	0.0321493	0.969643
462	Cyflufenamid	3	3	3	Good	1.4267	In	1251	0.0585108	0.94197
245	Bromoxynil-octanoate	3	3	3	Good	1.42585	In	696	0.098517	0.895798
931	Halacrinate	3	3	3	Good	1.42536	In	647	0.0153342	0.987447
152	Azoxybenzene	3	3	3	Good	1.42283	In	449	0.00348979	0.996305
3	(R)-flufiprole	3	3	3	Good	1.42173	In	722	0.0355041	0.958406
823	Flufiprole	3	3	3	Good	1.42173	In	722	0.0355041	0.958406
1178	Methyldymron	3	3	3	Good	1.42088	In	64	0.0223501	0.973744
376	Chlorpropham	3	3	3	Good	1.42073	In	290	0.0272738	0.971518
499	Delachlor	3	3	3	Good	1.42006	In	534	0.0156185	0.981972
335	Chloreturon	3	3	3	Good	1.41944	In	278	0.0183892	0.981237
1558	Terbumeton	3	3	3	Good	1.41939	In	973	0.00803269	0.991836
971	Imazamethabenz-methyl	3	3	3	Good	1.41802	In	1069	0.0268671	0.973184
1466	Quizalofop-ethyl	3	3	3	Good	1.41466	In	647	0.0299816	0.972774
55	4,4-methylenedianiline	3	3	3	Good	1.41281	In	64	0.0120048	0.988314
607	Dinocton	3	3	3	Good	1.41156	In	982	0.0311276	0.974399
1510	Spinetoram	3	3	3	Good	1.41132	In	1062	0.0240713	0.980486
1117	Medetomidine	3	3	3	Good	1.41101	In	92	0.02041	0.979775
978	Imazaquin methyl	3	3	3	Good	1.41032	In	994	0.0320698	0.968948
1293	Pendimethalin	3	3	3	Good	1.40969	In	534	0.017463	0.983389
942	Haloxyfop-P-methyl	3	3	3	Good	1.4094	In	647	0.00612268	0.994114
847	Fluoxapiprolin	3	3	3	Good	1.40771	In	533	0.0434807	0.959841
770	Fentrazamide	3	3	3	Good	1.40606	In	108	0.0221183	0.978023
1191	Metoxuron	3	3	3	Good	1.40563	In	47	0.0299127	0.977018
575	Diflubenzuron	3	3	3	Good	1.405	In	604	0.0243491	0.973818
129	Anilofos	3	3	3	Good	1.40387	In	1069	0.021675	0.979136
1550	Tembotrione	3	3	3	Good	1.4031	In	483	0.0701275	0.891239
1569	Tetraniliprole	3	3	3	Good	1.40003	In	533	0.0283962	0.971396
1061	Ketospiradox	3	3	3	Good	1.39859	In	988	0.0762215	0.867519
673	Ethalfluralin	3	3	3	Good	1.39836	In	108	0.0163877	0.982541
228	Broflanilide	3	3	3	Good	1.39622	In	441	0.0954784	0.891598
1170	Methyl (((1-(5-(2-chloro-4-(trifluoromethyl)phenoxy)-2-nitrophenyl)-2-methoxyethylidene)amino)oxy)acetate	3	3	3	Good	1.3954	In	604	0.0245184	0.972512
1415	Pyrasulfotole	3	3	3	Good	1.39404	In	994	0.0186644	0.979568
1006	Ioxynil octanoate	3	3	3	Good	1.39373	In	696	0.0904384	0.917325
1376	Propazine	3	3	3	Good	1.3929	In	685	0.00723824	0.991932
715	Fenapanil	3	3	3	Good	1.3922	In	449	0.00603077	0.994059
1560	Terbutryn	3	3	3	Good	1.39163	In	685	0.00659971	0.992336
1052	Isoxathion	3	3	3	Good	1.38973	In	1219	0.00278003	0.996755
612	Dinosulfon	3	3	3	Good	1.38772	In	1251	0.0420432	0.963213
884	Fonofos	3	3	3	Good	1.3877	In	686	0.00531113	0.992382
1063	Kresoxim-methyl	3	3	3	Good	1.38703	In	1172	0.00834941	0.992041
628	Diquat	3	3	3	Good	1.38638	In	92	0.021445	0.978787
1557	Terbufos	3	3	3	Good	1.38525	In	220	0.0150996	0.977837
402	Clodinafop propargyl	3	3	3	Good	1.38425	In	647	0.0224012	0.977634
233	Bromethalin	3	3	3	Good	1.38221	In	89	0.0283993	0.971733
416	Cloquintocet-mexyl	3	3	3	Good	1.37987	In	424	0.0210927	0.97852
1426	Pyribenzoxim	3	3	3	Good	1.37949	In	533	0.0332066	0.967306
1680	Valifenalate	3	3	3	Good	1.37831	In	1069	0.027478	0.968696
858	Flupyrimin	3	3	3	Good	1.3783	In	1069	0.0205875	0.979556
1413	Pyraoxystrobin	3	3	3	Good	1.37778	In	604	0.0281529	0.968826
1430	Pyridafenthion	3	3	3	Good	1.37764	In	1172	0.0111512	0.987737
1131	Mepronil	3	3	3	Good	1.37682	In	1287	0.0166872	0.981205
1012	Iprobenfos	3	3	3	Good	1.37647	In	641	0.00864868	0.986912
242	Bromopropylate	3	3	3	Good	1.37551	In	483	0.0438911	0.934906
632	Disulfoton	3	3	3	Good	1.37408	In	343	0.0206616	0.96991
1275	Oxazosulfyl	3	3	3	Good	1.37335	In	67	0.0176532	0.980232
503	Demeton	3	3	3	Good	1.37322	In	343	0.0194718	0.972646
1571	Thenylchlor	3	3	3	Good	1.37319	In	603	0.01287	0.98683
807	Fluchloraminopyr-tefuryl	3	3	3	Good	1.37292	In	555	0.0234377	0.973329
604	Dinitramine	3	3	3	Good	1.37286	In	1287	0.0167193	0.981983
182	Benzadox	3	3	3	Good	1.37167	In	840	0.0255269	0.979419
1070	Lenacil	3	3	3	Good	1.37006	In	994	0.0210284	0.978986
933	Halauxifen-methyl	3	3	3	Good	1.36993	In	555	0.0255696	0.969075
581	Dimefuron	3	3	3	Good	1.36916	In	1126	0.0425022	0.959766
1488	Silthiofam	3	3	3	Good	1.3688	In	603	0.0125843	0.986209
1060	Kelevan	3	3	3	Good	1.36813	In	988	0.0797298	0.848659
42	2,5-dichlorobenzoic acid methyl ester	3	3	3	Good	1.36754	In	491	0.0800489	0.873416
938	Haloxydine	3	3	3	Good	1.36472	In	1085	0.0374731	0.957254
400	Cliodinate	3	3	3	Good	1.36263	In	1249	0.0145299	0.987107
398	Clethodim	3	3	3	Good	1.36261	In	555	0.0149674	0.983427
229	Brofluthrinate	3	3	3	Good	1.3621	In	1069	0.0192463	0.981126
640	DNOC	3	3	3	Good	1.36018	In	976	0.0477311	0.967425
1539	Tebufenozide	3	3	3	Good	1.35948	In	1069	0.0161903	0.98206
966	Icaridin	3	3	3	Good	1.35894	In	33	0.0238346	0.980717
1128	Mephenate	3	3	3	Good	1.35843	In	47	0.0480397	0.958056
904	Furalaxyl-M	3	3	3	Good	1.35794	In	1069	0.0230401	0.978204
1636	Triazophos	3	3	3	Good	1.35569	In	685	0.00804418	0.9906
959	Hexythiazox	3	3	3	Good	1.35554	In	1126	0.0414368	0.958573
852	Flupropacil	3	3	3	Good	1.35509	In	1126	0.0379244	0.961591
1126	Mepanipyrim	3	3	3	Good	1.35448	In	685	0.00755695	0.991274
1017	Isazofos	3	3	3	Good	1.35388	In	973	0.00755566	0.992125
1206	Monalide	3	3	3	Good	1.35146	In	722	0.0290556	0.966194
684	Ethiprole	3	3	3	Good	1.35043	In	722	0.0346811	0.966089
1241	Nitrapyrin	3	3	3	Good	1.35042	In	1249	0.0041086	0.995213
1559	Terbuthylazine	3	3	3	Good	1.35017	In	685	0.00745105	0.99204
585	Dimethametryn	3	3	3	Good	1.34979	In	1287	0.0236894	0.977977
168	Benfuresate	3	3	3	Good	1.34873	In	483	0.045817	0.925108
1691	Zarilamid	3	3	3	Good	1.34821	In	1126	0.0469874	0.952084
599	Dimoxystrobin	3	3	3	Good	1.34692	In	1172	0.01367	0.984234
765	Fenthion sulfoxide	3	3	3	Good	1.34426	In	578	0.023313	0.964889
90	Allyxycarb	3	3	3	Good	1.34365	In	92	0.0222982	0.976397
436	Credazine	3	3	3	Good	1.34242	In	685	0.00813058	0.990627
1113	Mecoprop methyl	3	3	3	Good	1.34241	In	453	0.0588385	0.907624
831	Flumipropyn	3	3	3	Good	1.34219	In	555	0.0224901	0.974666
64	Acetochlor	3	3	3	Good	1.34087	In	1069	0.020153	0.981762
667	Esprocarb	3	3	3	Good	1.34028	In	982	0.0166358	0.98214
998	Iodobonil	3	3	3	Good	1.33996	In	534	0.0220865	0.975275
25	1-methylcyclopropene	3	3	3	Good	1.33882	In	453	0.0389216	0.939447
759	Fenridazon-propyl	3	3	3	Good	1.33798	In	47	0.0303352	0.970051
1360	Profoxydim	3	3	3	Good	1.33687	In	604	0.0202847	0.978198
31	2-(thiocyanomethylthio)benzothiazole	3	3	3	Good	1.33533	In	1249	0.0213163	0.979435
1304	Pethoxamid	3	3	3	Good	1.33526	In	1069	0.0233385	0.979542
41	2,4-dimethylphenol	3	3	3	Good	1.33398	In	966	0.0212593	0.963769
714	Fenamiphos	3	3	3	Good	1.33207	In	982	0.0192564	0.976792
1382	Propisochlor	3	3	3	Good	1.33195	In	534	0.0240742	0.971597
1676	Tyclopyrazoflor	3	3	3	Good	1.33077	In	534	0.0257738	0.969875
562	Diethatyl ethyl	3	3	3	Good	1.33048	In	1069	0.0228257	0.978734
370	Chloroxynil	3	3	3	Good	1.33	In	51	0.0645268	0.910599
1682	Verbutin	3	3	3	Good	1.32799	In	1087	0.00870793	0.985548
1370	Propamidine	3	3	3	Good	1.32703	In	685	0.00672629	0.991921
1240	Nitralin	3	3	3	Good	1.32695	In	603	0.0102323	0.988707
1278	Oxpoconazole	3	3	3	Good	1.32574	In	722	0.028125	0.967655
1279	Oxpoconazole fumarate	3	3	3	Good	1.32574	In	722	0.028125	0.967655
845	Fluothiuron	3	3	3	Good	1.32492	In	1100	0.0373912	0.960351
257	Butachlor	3	3	3	Good	1.32424	In	624	0.0651174	0.953811
263	Butenachlor	3	3	3	Good	1.32328	In	575	0.0621204	0.946529
1007	Ipazine	3	3	3	Good	1.32087	In	1287	0.0142912	0.985753
1226	Naled	3	3	3	Good	1.31834	In	641	0.0273517	0.950732
1334	Piperonyl butoxide	3	3	3	Good	1.31768	In	320	0.0186836	0.970378
1576	Thiapronil	3	3	3	Good	1.31718	In	47	0.0511767	0.951598
697	Ethylchlozate	3	3	3	Good	1.31656	In	47	0.0503538	0.952943
368	Chloroxuron	3	3	3	Good	1.31628	In	1100	0.0382548	0.958952
625	Dipropetryn	3	3	3	Good	1.3162	In	1287	0.00785349	0.991258
1625	Triadimefon	3	3	3	Good	1.31529	In	647	0.0210368	0.977941
647	Edifenphos	3	3	3	Good	1.31217	In	1239	0.0300588	0.955646
1527	Sulfotep	3	3	3	Good	1.31197	In	1239	0.0239966	0.960235
374	Chlorprazophos	3	3	3	Good	1.31191	In	1251	0.0358253	0.964448
397	Clacyfos	3	3	3	Good	1.31177	In	138	0.0739346	0.893721
564	Dietholate	3	3	3	Good	1.30879	In	641	0.0205615	0.965178
176	Bensultap	3	3	3	Good	1.30789	In	171	0.00853791	0.986368
205	Bifenazate	3	3	3	Good	1.30733	In	603	0.0104564	0.990608
644	Drazoxolon	3	3	3	Good	1.30387	In	47	0.0587226	0.943786
996	Inezin	3	3	3	Good	1.30042	In	1239	0.029943	0.959474
1461	Quinothion	3	3	3	Good	1.30022	In	1172	0.0217696	0.976835
1540	Tebufenpyrad	3	3	3	Good	1.29717	In	647	0.0265442	0.974701
1673	Tripyrasulfone	3	3	3	Good	1.29702	In	1251	0.0468444	0.945178
929	Guazatine	3	3	3	Good	1.2969	In	477	0.0660935	0.94251
987	Iminoctadine triacetate	3	3	3	Good	1.2969	In	477	0.0660935	0.94251
254	Buminafos	3	3	3	Good	1.29657	In	1251	0.0338872	0.963694
611	Dinoseb acetate	3	3	3	Good	1.29482	In	1287	0.0158947	0.98346
1103	MCPA-thioethyl	3	3	3	Good	1.29468	In	609	0.036718	0.94676
1098	MCPA-isobutyl	3	3	3	Good	1.2945	In	483	0.047303	0.93579
1520	Sulcotrione	3	3	3	Good	1.29425	In	988	0.0455531	0.904914
1356	Profenofos	3	3	3	Good	1.29098	In	483	0.0326897	0.942756
72	Aclonifen	3	3	3	Good	1.28948	In	47	0.0480291	0.961532
1147	Metazoxolon	3	3	3	Good	1.28899	In	1126	0.0552708	0.948255
246	Bromoxynil-potassium	3	3	3	Good	1.28838	In	572	0.0134616	0.985462
1614	Tolylfluanid	3	3	3	Good	1.28761	In	1100	0.0200207	0.981445
1662	Triflumuron	3	3	3	Good	1.28758	In	278	0.0517339	0.95231
334	Chlorethoxyfos	3	3	3	Good	1.28742	In	641	0.0209938	0.966834
199	Benzyl benzoate	3	3	3	Good	1.28688	In	1087	0.0114011	0.978826
475	Cyperquat	3	3	3	Good	1.28215	In	1249	0.0105087	0.987732
476	Cyperquat iodide	3	3	3	Good	1.28215	In	1249	0.0105087	0.987732
431	Coumafuryl sodium	3	3	3	Good	1.28189	In	453	0.0391511	0.931597
347	Chlorfluren	3	3	3	Good	1.28135	In	483	0.0281143	0.945347
1374	Propaquizafop	3	3	3	Good	1.28117	In	647	0.0423195	0.956187
524	Dicamba methyl	3	3	3	Good	1.2811	In	138	0.0833893	0.866335
134	Aspon	3	3	3	Good	1.28093	In	547	0.0098543	0.985067
829	Flumiclorac-pentyl	3	3	3	Good	1.27975	In	604	0.019582	0.983019
940	Haloxyfop-etotyl	3	3	3	Good	1.27889	In	647	0.0230614	0.977665
482	Cyprofuram	3	3	3	Good	1.27836	In	533	0.0381863	0.974224
1368	Prometryn	3	3	3	Good	1.27795	In	1249	0.0113433	0.986586
1365	Promacyl	3	3	3	Good	1.27737	In	1172	0.0207044	0.978536
302	Carbosulfan	3	3	3	Good	1.27495	In	1287	0.0174619	0.98316
1025	Isofenphos	3	3	3	Good	1.27488	In	120	0.0232705	0.975191
1549	Tefuryltrione	3	3	3	Good	1.2739	In	988	0.0315455	0.933246
1405	Pyraclofos	3	3	3	Good	1.27257	In	1126	0.0528612	0.950559
259	Butamifos	3	3	3	Good	1.27205	In	603	0.0126451	0.984638
687	Ethofumesate	3	3	3	Good	1.27157	In	453	0.0527776	0.914458
1375	Propargite	3	3	3	Good	1.27157	In	330	0.00344028	0.994009
272	Butroxydim	3	3	3	Good	1.26685	In	1287	0.0253709	0.976745
1448	Pyrithiobac-sodium	3	3	3	Good	1.26568	In	278	0.0458246	0.957593
251	Brucine	3	3	3	Good	1.26374	In	759	0.0701147	0.925605
777	Fipronil	3	3	3	Good	1.26314	In	1251	0.0436123	0.95483
13	1,1-dichloroethane	3	3	3	Good	1.25827	In	813	0.0260871	0.970901
11	1,1,1-trichloroethane	3	3	3	Good	1.25676	In	675	0.0139934	0.978106
300	Carbon tetrachloride	3	3	3	Good	1.25676	In	675	0.0139934	0.978106
405	Clofencet potassium	3	3	3	Good	1.25611	In	1126	0.0527764	0.956789
44	24-epibrassinolide	3	3	3	Good	1.25473	In	501	0.0373298	0.934425
518	Diazinon	3	3	3	Good	1.25362	In	571	0.00534349	0.99436
927	Griseofulvin	3	3	3	Good	1.24858	In	988	0.0628788	0.871759
533	Dichlorprop-butotyl	3	3	3	Good	1.24719	In	138	0.0902108	0.838083
1391	Prosulfuron	3	3	3	Good	1.24615	In	1100	0.0289619	0.975369
214	Bis(2-chloroethyl)ether	3	3	3	Good	1.24564	In	843	0.0411858	0.952981
132	Arsenic acid	3	2	3	Good	1.24446	In	697	0.0717189	0.856815
708	Etridiazole	3	3	3	Good	1.24388	In	788	0.0280742	0.970259
1069	Lead arsenate	3	2	3	Good	1.24241	In	697	0.0755102	0.848083
1296	Penoxsulam	3	3	3	Good	1.24108	In	982	0.0367027	0.959588
19	1,3-dichloropropene	3	3	3	Good	1.23957	In	836	0.0168178	0.978441
324	Chlorazine	3	3	3	Good	1.23621	In	972	0.0280084	0.970823
1339	Piprotal	3	3	3	Good	1.23619	In	406	0.0293991	0.954073
670	Etaphos	3	3	3	Good	1.2338	In	491	0.0971063	0.853789
1552	Tepraloxydim	3	3	3	Good	1.23025	In	533	0.0182703	0.98567
422	Copper bis(3-phenylsalicylate)	3	3	3	Good	1.22991	In	434	0.0093527	0.985133
746	Fenoxasulfone	3	3	3	Good	1.22962	In	722	0.0334151	0.965985
1438	Pyrimethanil	3	3	3	Good	1.22862	In	14	0.00697496	0.992937
1305	Phenisopham	3	3	3	Good	1.22764	In	568	0.00839512	0.990727
1100	MCPA-isopropyl	3	3	3	Good	1.22662	In	839	0.0393623	0.944433
1112	Mecoprop etexyl	3	3	3	Good	1.22611	In	483	0.0342595	0.938659
1115	Mecoprop-P etexyl	3	3	3	Good	1.22611	In	483	0.0342595	0.938659
610	Dinosam	3	3	3	Good	1.22565	In	105	0.0531452	0.964644
1033	Isophorone	3	3	3	Good	1.22492	In	212	0.0149202	0.977058
139	Atrazine	3	3	3	Good	1.22454	In	356	0.0142585	0.988186
1250	Norflurazon	3	3	3	Good	1.22304	In	47	0.059959	0.945819
111	Aminocyclopyrachlor-potassium	3	3	3	Good	1.22133	In	733	0.0405131	0.959617
1088	Mandipropamid	3	3	3	Good	1.22	In	722	0.0179611	0.977322
220	Bis-trichloromethyl sulfone	3	3	3	Good	1.21988	In	212	0.0159503	0.97364
161	Benazolin-ethyl	3	3	3	Good	1.21881	In	1126	0.0460527	0.962414
1440	Pyriminobac-methyl	3	3	3	Good	1.21737	In	568	0.0141811	0.984827
1659	Trifluenfuronate	3	3	3	Good	1.214	In	640	0.013677	0.980387
901	Fuphenthiourea	3	3	3	Good	1.21346	In	47	0.0521726	0.946416
380	Chlorsulfuron	3	3	3	Good	1.21254	In	533	0.0356535	0.962969
1222	N,N-dimethyl capramide	3	3	3	Good	1.20583	In	1054	0.0548814	0.927164
95	Alpha-naphthylthiourea	3	3	3	Good	1.1989	In	14	0.0106919	0.98846
995	Indoxacarb	3	3	3	Good	1.19842	In	533	0.0517208	0.949423
1026	Isofenphos-methyl	3	3	3	Good	1.19561	In	603	0.0158549	0.983739
66	Acetoprole	3	3	3	Good	1.19537	In	722	0.0466174	0.956101
1521	Sulfallate	3	3	3	Good	1.19357	In	111	0.109779	0.895199
583	Dimetachlone	3	3	3	Good	1.19353	In	722	0.0213558	0.975501
341	Chlorfenprop-methyl	3	3	3	Good	1.19334	In	839	0.0383244	0.934629
1341	Pirimiphos-ethyl	3	3	3	Good	1.19328	In	553	0.00774155	0.99272
1155	Methazole	3	3	3	Good	1.18813	In	722	0.0252991	0.972283
466	Cyhalofop	3	3	3	Good	1.1844	In	49	0.0422885	0.970367
17	1,2-dichloropropane	3	3	3	Good	1.18051	In	836	0.0174616	0.981806
457	Cyclosulfamuron	3	3	3	Good	1.17974	In	972	0.020704	0.978879
591	Dimethomorph	3	3	3	Good	1.17881	In	737	0.0636789	0.941638
105	Amidoflumet	3	3	3	Good	1.17866	In	1126	0.0717558	0.929348
312	Chlobenthiazone	3	3	3	Good	1.17642	In	1251	0.0476933	0.959662
289	Captafol	3	3	3	Good	1.17413	In	982	0.0405781	0.952947
948	Heterophos	3	3	3	Good	1.17341	In	640	0.0161957	0.97032
761	Fensulfothion	3	3	3	Good	1.17305	In	640	0.0308688	0.959699
1588	Thiocyclam oxalate	3	3	3	Good	1.1711	In	377	0.0400896	0.941084
414	Clopyralid	3	3	3	Good	1.1708	In	27	0.0301748	0.97277
1087	Mandestrobin	3	3	3	Good	1.17005	In	569	0.0188047	0.978095
446	Cyazofamid	3	3	3	Good	1.16977	In	972	0.0141859	0.984504
1450	Pyroxasulfone	3	3	3	Good	1.16801	In	1076	0.0244997	0.973793
1367	Prometon	3	3	3	Good	1.16664	In	356	0.0111721	0.988271
519	Dibromochloropropane	3	3	3	Good	1.16544	In	729	0.0255396	0.972235
1684	Vinclozolin	3	3	3	Good	1.16471	In	722	0.0297643	0.969792
526	Dichlobentiazox	3	3	3	Good	1.16058	In	1251	0.0429392	0.95066
755	Fenpyrazone	3	3	3	Good	1.16007	In	733	0.0384462	0.956021
1099	MCPA-isoctyl	3	3	3	Good	1.15889	In	486	0.0783897	0.891217
663	EPTC	3	3	3	Good	1.15823	In	177	0.0925465	0.904392
426	Copper naphthenate	3	3	3	Good	1.15625	In	320	0.0178812	0.968103
1591	Thiomersal	3	3	3	Good	1.1559	In	320	0.0173667	0.967149
369	Chloroxylenol	3	3	3	Good	1.15275	In	831	0.0139599	0.980427
1472	Saflufenacil	3	3	3	Good	1.15203	In	533	0.0468414	0.9475
1309	Phenthoate	3	3	3	Good	1.15137	In	640	0.0199405	0.973141
1601	Tiafenacil	3	3	3	Good	1.15097	In	737	0.0615452	0.944466
262	Butathiofos	3	3	3	Good	1.14942	In	606	0.0229697	0.974249
577	Diflufenzopyr	3	3	3	Good	1.14719	In	725	0.060479	0.946725
7	1-(4-chloro-1,3-dihydro-1,3-dioxo-2H-isoindole-2-yl)-cyclohexanecarboxamide	3	3	3	Good	1.1447	In	1251	0.0148501	0.983193
1477	Sebuthylazine	3	3	3	Good	1.14261	In	553	0.0237536	0.974714
1522	Sulfentrazone	3	3	3	Good	1.14035	In	722	0.0497693	0.960656
1600	Tiadinil	3	3	3	Good	1.13851	In	533	0.0575454	0.947063
351	Chloridazon	3	3	3	Good	1.13778	In	533	0.0627673	0.93971
1458	Quinoclamine	3	3	3	Good	1.13409	In	733	0.0437901	0.953113
162	Benazolin-potassium	3	3	3	Good	1.13345	In	733	0.0428798	0.95266
1683	Vernolate	3	3	3	Good	1.13249	In	177	0.0801619	0.914644
1289	Pebulate	3	3	3	Good	1.13224	In	177	0.0800779	0.914774
399	Climbazole	3	3	3	Good	1.13209	In	47	0.0701589	0.938772
45	2-allyphenol	3	3	3	Good	1.13103	In	1239	0.023709	0.964772
1574	Thiacloprid	3	3	3	Good	1.13094	In	598	0.00863472	0.989428
919	Glyceryl distearate	3	3	3	Good	1.12863	In	474	0.0871285	0.857916
110	Aminocyclopyrachlor-methyl	3	3	3	Good	1.12827	In	733	0.0507593	0.950054
958	Hexylthiofos	3	3	3	Good	1.12778	In	320	0.025987	0.95965
594	Dimethyl phthalate	3	3	3	Good	1.12511	In	640	0.0301743	0.964389
949	Hexachloroacetone	3	3	3	Good	1.12474	In	320	0.023501	0.963948
1613	Toluene 2,4-diisocyanate	3	3	3	Good	1.1242	In	598	0.0210731	0.976056
255	Bupirimate	3	3	3	Good	1.1234	In	1094	0.0153569	0.983362
1602	Tiaojiean	3	3	3	Good	1.12331	In	837	0.0638104	0.873223
86	Allidochlor	3	3	3	Good	1.12316	In	85	0.0839753	0.900548
1608	Titanium dioxide	3	2	3	Good	1.12164	In	1149	0.0986073	0.758249
1487	Silica	3	2	3	Good	1.12158	In	1149	0.0985565	0.759372
1042	Isothioate	3	3	3	Good	1.12148	In	640	0.0169421	0.969918
261	Butanethiol	3	3	3	Good	1.11922	In	506	0.0431059	0.945373
1480	Semiamitraz hydrochloride	3	3	3	Good	1.11765	In	553	0.0166264	0.983922
1658	Trifludimoxazin	3	3	3	Good	1.11454	In	229	0.0228735	0.975522
497	Defenuron	3	3	3	Good	1.11289	In	598	0.0209623	0.977852
1315	Phosalone	3	3	3	Good	1.11258	In	533	0.0560381	0.944399
14	1,2,3-trichloropropane	3	3	3	Good	1.11214	In	834	0.0120861	0.985099
1043	Isotianil	3	3	3	Good	1.11039	In	533	0.0521437	0.94834
100	Ametryn	3	3	3	Good	1.10889	In	553	0.0120815	0.987137
373	Chlorphoxim	3	3	3	Good	1.10863	In	722	0.0241342	0.970421
1310	Phenylmercuric acetate	3	3	3	Good	1.1075	In	320	0.020853	0.967419
883	Fomesafen	3	3	3	Good	1.10692	In	733	0.0620495	0.953329
1062	Kinoprene	3	3	3	Good	1.1041	In	609	0.0174324	0.972785
970	Imazamethabenz	3	3	3	Good	1.10287	In	114	0.018071	0.978346
1357	Profluazol	3	3	3	Good	1.10055	In	1251	0.0405002	0.969486
793	Fluazifop	3	3	3	Good	1.09965	In	340	0.0581049	0.941814
795	Fluazifop-P	3	3	3	Good	1.09965	In	340	0.0581049	0.941814
310	Cetrimide	3	3	3	Good	1.09944	In	115	0.0245663	0.972338
1615	Topramezone	3	3	3	Good	1.09624	In	229	0.0266995	0.976359
1093	MCPA-butyl	3	3	3	Good	1.09563	In	839	0.0444301	0.918559
1184	Metobromuron	3	3	3	Good	1.09546	In	606	0.015614	0.982128
717	Fenasulam	3	3	3	Good	1.09484	In	533	0.0544925	0.947776
1514	Spiropidion	3	3	3	Good	1.09386	In	733	0.0547132	0.945738
410	Clomazone	3	3	3	Good	1.09376	In	733	0.0559853	0.952963
555	Dicoumarol	3	3	3	Good	1.09216	In	327	0.0336588	0.947936
217	Bispyribac	3	3	3	Good	1.09172	In	733	0.0418456	0.955695
290	Captan	3	3	3	Good	1.09171	In	229	0.0175303	0.979253
1158	Methiocarb	3	3	3	Good	1.09068	In	606	0.0141119	0.983522
437	Crimidine	3	3	3	Good	1.08771	In	754	0.00970914	0.990186
1362	Proglinazine-ethyl	3	3	3	Good	1.08698	In	606	0.0149551	0.981657
600	Dinex	3	3	3	Good	1.08698	In	733	0.0458724	0.9577
601	Dinex-diclexine	3	3	3	Good	1.08698	In	733	0.0458724	0.9577
813	Fluenetil	3	3	3	Good	1.08556	In	519	0.0183704	0.968425
1328	Picloram-methyl	3	3	3	Good	1.08314	In	1251	0.0718727	0.926494
830	Flumioxazin	3	3	3	Good	1.08232	In	722	0.0307858	0.961926
544	Dichlozoline	3	3	3	Good	1.08199	In	441	0.0666492	0.916238
1460	Quinonamid	3	3	3	Good	1.08162	In	533	0.0535886	0.94312
172	Benquinox	3	3	3	Good	1.07799	In	651	0.00754162	0.992204
681	Ethiolate	3	3	3	Good	1.07776	In	177	0.068823	0.928386
926	Glyphosine	3	3	3	Good	1.0771	In	830	0.062327	0.86365
510	Desmetryn	3	3	3	Good	1.07684	In	1155	0.00845981	0.991529
1188	Metominostrobin	3	3	3	Good	1.07532	In	651	0.00925561	0.989522
626	Dipymetitrone	3	3	3	Good	1.07499	In	123	0.121677	0.819426
1353	Procyazine	3	3	3	Good	1.07433	In	1001	0.0243962	0.973457
1252	Noruron	3	3	3	Good	1.0729	In	997	0.0385794	0.947646
1032	Isonoruron	3	3	3	Good	1.07244	In	997	0.0385111	0.947764
354	Chlorine dioxide	3	2	3	Good	1.07239	In	1149	0.0951165	0.74457
1047	Isoxachlortole	3	3	3	Good	1.07228	In	1251	0.0475309	0.953239
173	Bensulfuron	3	3	3	Good	1.07168	In	80	0.0254935	0.976895
1515	Spirotetramat	3	3	3	Good	1.06998	In	972	0.0172557	0.979799
1150	Metepa	3	3	3	Good	1.06923	In	430	0.0619189	0.916398
963	Hydroquinone	3	3	3	Good	1.0669	In	326	0.0279103	0.960949
1286	Parathion-ethyl	3	3	3	Good	1.06627	In	788	0.00920124	0.990211
1162	Methiuron	3	3	3	Good	1.06369	In	1155	0.00896763	0.991456
1316	Phosametine	3	3	3	Good	1.06189	In	830	0.0733493	0.874421
1669	Trimethacarb	3	3	3	Good	1.05913	In	387	0.00821079	0.991694
268	Butonate	3	3	3	Good	1.05901	In	354	0.0328345	0.940226
1554	Terbacil	3	3	3	Good	1.05847	In	733	0.0389949	0.961242
1096	MCPA-etexyl	3	3	3	Good	1.05792	In	165	0.0789819	0.85168
589	Dimethirimol	3	3	3	Good	1.0544	In	1094	0.0138643	0.984292
1118	Medinoterb	3	3	3	Good	1.05324	In	533	0.0521851	0.945226
1246	N-methyl-2-pyrrolidone	3	3	3	Good	1.052	In	451	0.0663743	0.925077
1067	Lancotrione sodium	3	3	3	Good	1.0511	In	123	0.0225932	0.951667
792	Fluazaindolizine	3	3	3	Good	1.05016	In	441	0.0580621	0.922112
530	Dichlormid	3	3	3	Good	1.04987	In	1180	0.0731299	0.925977
1364	Prohydrojasmon	3	3	3	Good	1.04956	In	320	0.0263903	0.951607
520	Dibutyl phthalate	3	3	3	Good	1.0471	In	512	0.0264061	0.960488
1453	Quinacetol sulphate	3	3	3	Good	1.04581	In	147	0.0275821	0.983729
1653	Trietazine	3	3	3	Good	1.04534	In	769	0.0279742	0.97163
994	Indolauxipyr-cyanomethyl	3	3	3	Good	1.0453	In	733	0.0397111	0.958152
97	Aluminium phosphide	3	2	3	Good	1.04287	In	1149	0.0892735	0.752018
833	Fluometuron	3	3	3	Good	1.04147	In	711	0.019549	0.977962
1284	Parafluron	3	3	3	Good	1.04133	In	711	0.0194744	0.978172
664	Epyrifenacil	3	3	3	Good	1.04017	In	733	0.0562763	0.958979
1312	Phenylmercury nitrate	3	3	3	Good	1.03643	In	258	0.00379693	0.996428
695	Ethyl butyl nitrosamine	3	3	3	Good	1.03602	In	643	0.118076	0.84922
588	Dimethipin	3	3	3	Good	1.03207	In	1210	0.0762014	0.853718
253	Bufencarb	3	3	3	Good	1.03058	In	292	0.0169297	0.985197
1272	Oxapyrazon	3	3	3	Good	1.02978	In	80	0.0187767	0.984837
1267	Oxabetrinil	3	3	3	Good	1.02971	In	189	0.0200552	0.981478
1616	Tralkoxydim	3	3	3	Good	1.02696	In	292	0.0211655	0.97712
1321	Phosphamidon	3	3	3	Good	1.02542	In	1251	0.0442491	0.961931
887	Formaldehyde	3	2	3	Good	1.02514	In	1149	0.0868876	0.75593
235	Bromobonil	3	3	3	Good	1.02368	In	509	0.0122838	0.98675
1484	Siduron	3	3	3	Good	1.02359	In	509	0.00939594	0.989884
298	Carbon dioxide	3	2	3	Good	1.02334	In	697	0.0992007	0.764883
1038	Isoprothiolane	3	3	3	Good	1.02328	In	780	0.0200962	0.969807
249	Bromuron	3	3	3	Good	1.02262	In	387	0.0084563	0.990583
1449	Pyroquilon	3	3	3	Good	1.0226	In	997	0.0483919	0.937243
315	Chloralose	3	2	3	Good	1.02239	In	697	0.10337	0.757326
445	Cyantraniliprole	3	3	3	Good	1.02036	In	533	0.0397168	0.96198
203	Bethoxazin	3	3	3	Good	1.02005	In	767	0.0246638	0.976113
627	Dipyrithione	3	3	3	Good	1.02001	In	598	0.0215139	0.980683
1092	MCPA-butotyl	3	3	3	Good	1.01836	In	609	0.0599038	0.905001
584	Dimethachlor	3	3	3	Good	1.01668	In	292	0.0147974	0.984779
1277	Oxolinic acid	3	3	3	Good	1.01506	In	80	0.0325381	0.971311
115	Amiprofos-methyl	3	3	3	Good	1.01406	In	651	0.00976294	0.992845
956	Hexazinone	3	3	3	Good	1.01336	In	292	0.0279104	0.968764
442	Cyanazine	3	3	3	Good	1.01103	In	751	0.00528364	0.994776
1323	Phoxim	3	3	3	Good	1.01041	In	788	0.00747647	0.992178
1145	Metazachlor	3	3	3	Good	1.01019	In	292	0.01424	0.986635
146	Aziprotryne	3	3	3	Good	1.00955	In	1268	0.00649209	0.993067
1037	Isopropyl myristate	3	3	3	Good	1.009	In	123	0.0481665	0.904481
305	Carfentrazone	3	3	3	Good	1.00838	In	726	0.0455666	0.951841
192	Benzofluor	3	3	3	Good	1.00366	In	532	0.0274401	0.970714
1313	Phorate	3	3	3	Good	1.00355	In	320	0.0407791	0.938707
928	Guadipyr	3	3	3	Good	1.00192	In	258	0.0109062	0.988659
778	Flamprop	3	3	3	Good	1.00171	In	733	0.0520014	0.95361
252	Bucarpolate	3	3	3	Good	1.00079	In	780	0.0199861	0.964466
69	Acifluorfen	3	3	3	Good	1.00031	In	1180	0.0381882	0.955234
274	Butyl stearate	3	3	3	Good	1.00021	In	123	0.0884553	0.864497
1031	Isomethiozin	3	3	3	Good	0.999971	In	569	0.00817806	0.991354
1665	Triflusulfuron-methyl	3	3	3	Good	0.998161	In	532	0.0255687	0.97122
429	Coumachlor	3	3	3	Good	0.991813	In	893	0.038885	0.92801
178	Bentazone	3	3	3	Good	0.991419	In	229	0.0292205	0.971457
1318	Phosfolan	3	3	3	Good	0.991106	In	292	0.016445	0.982658
112	Aminopyralid	3	3	3	Good	0.988551	In	155	0.064689	0.951682
113	Aminopyralid-dimethylammonium	3	3	3	Good	0.988551	In	155	0.064689	0.951682
649	Eglinazine-ethyl	3	3	3	Good	0.987664	In	258	0.00795475	0.991202
1373	Propaphos	3	3	3	Good	0.986252	In	512	0.0142644	0.979228
962	Hydroprene	3	3	3	Good	0.985924	In	832	0.029556	0.952554
1483	S-hydroprene	3	3	3	Good	0.985924	In	832	0.029556	0.952554
1221	N-(3-chloro-2,6-dimethylphenyl)-2-methoxy-N-(tetrahydr-2-oxo-3-furanyl)acetamide	3	3	3	Good	0.984483	In	806	0.0441493	0.953247
1377	Propetamphos	3	3	3	Good	0.984099	In	972	0.0306236	0.969648
62	Acetamiprid	3	3	3	Good	0.983712	In	751	0.00853622	0.990483
1165	Methoprene	3	3	3	Good	0.979465	In	248	0.0303885	0.954943
1494	S-methoprene	3	3	3	Good	0.979465	In	248	0.0303885	0.954943
1592	Thiometon	3	3	3	Good	0.978624	In	379	0.0253309	0.968562
1338	Piproctanyl	3	3	3	Good	0.976776	In	798	0.0188259	0.979496
504	Demeton-O-methyl	3	3	3	Good	0.975059	In	379	0.0233296	0.967338
680	Ethiofencarb	3	3	3	Good	0.974504	In	292	0.0190821	0.97707
389	Choline chloride	3	2	3	Good	0.97372	In	474	0.106276	0.791436
175	Bensulide	3	3	3	Good	0.969355	In	606	0.0189713	0.978901
296	Carbetamide	3	3	3	Good	0.968868	In	292	0.0122977	0.984339
1105	M-cumenyl methylcarbamate	3	3	3	Good	0.968685	In	797	0.00619223	0.993139
1478	Secbumeton	3	3	3	Good	0.967148	In	548	0.0082855	0.9907
183	Benzadox ammonium	3	3	3	Good	0.966683	In	292	0.0138211	0.983545
355	Chlormephos	3	3	3	Good	0.966582	In	379	0.0144816	0.976874
401	Clodinafop	3	3	3	Good	0.966304	In	102	0.0563249	0.955143
1265	Orysastrobin	3	3	3	Good	0.964584	In	292	0.0289345	0.969431
138	Atraton	3	3	3	Good	0.9645	In	1156	0.00668822	0.993839
1247	N-methylneodecanamide	3	3	3	Good	0.963998	In	726	0.0461374	0.953799
1342	Pirimiphos-methyl	3	3	3	Good	0.963712	In	1156	0.00852944	0.991905
460	Cycluron	3	3	3	Good	0.963709	In	509	0.0117927	0.988704
988	Imiprothrin	3	3	3	Good	0.963199	In	292	0.0291511	0.967088
1387	Propyrisulfuron	3	3	3	Good	0.963143	In	972	0.0282244	0.970624
1002	Iodosulfuron-methyl-sodium	3	3	3	Good	0.962658	In	532	0.0112215	0.98836
1200	Mipafox	3	3	3	Good	0.962532	In	189	0.0331812	0.961764
1232	Naptalam	3	3	3	Good	0.960666	In	219	0.0320506	0.967541
1579	Thicyofen	3	3	3	Good	0.960519	In	1251	0.0280198	0.970183
1686	Warfarin	3	3	3	Good	0.960503	In	1016	0.0271047	0.955472
1444	Pyriofenone	3	3	3	Good	0.960353	In	1251	0.0422992	0.951864
275	Butylate	3	3	3	Good	0.960132	In	726	0.0455264	0.958542
264	Buthidazole	3	3	3	Good	0.959239	In	191	0.0545345	0.953835
586	Dimethenamid	3	3	3	Good	0.957444	In	681	0.00857175	0.989545
587	Dimethenamid-P	3	3	3	Good	0.957444	In	681	0.00857175	0.989545
1039	Isoproturon	3	3	3	Good	0.957107	In	1233	0.00538777	0.994297
1349	Primisulfuron	3	3	3	Good	0.956136	In	1236	0.0233661	0.978066
991	Indazapyroxamet	3	3	3	Good	0.955519	In	997	0.0328379	0.956556
441	Cyanatryn	3	3	3	Good	0.953342	In	372	0.0152906	0.982106
1398	Proximpham	3	3	3	Good	0.95053	In	1156	0.00803985	0.990411
1509	Spidoxamat	3	3	3	Good	0.94966	In	1251	0.0417699	0.955109
375	Chlorprocarb	3	3	3	Good	0.949555	In	509	0.00540719	0.994129
1223	N1,N2-diallyl-N2-dichloroacetylglycinamide	3	3	3	Good	0.947432	In	1251	0.033342	0.962745
528	Dichlofluanid	3	3	3	Good	0.946785	In	532	0.0124788	0.988321
1035	Isoprocarb	3	3	3	Good	0.945589	In	644	0.00540693	0.994326
77	AD-67	3	3	3	Good	0.945	In	292	0.0150527	0.983093
1351	Probenazole	3	3	3	Good	0.944991	In	292	0.0151098	0.982615
1582	Thiencarbazone	3	3	3	Good	0.942771	In	176	0.0294093	0.97839
1238	Nitenpyram	3	3	3	Good	0.942567	In	1233	0.00599133	0.992625
726	Fenethacarb	3	3	3	Good	0.941797	In	681	0.0142027	0.98651
733	Fenobucarb	3	3	3	Good	0.94004	In	681	0.0150442	0.98561
1442	Pyrimisulfan	3	3	3	Good	0.938276	In	413	0.0483211	0.95171
1393	Prothiocarb	3	3	3	Good	0.937889	In	1232	0.0569159	0.93405
730	Fenitropan	3	3	3	Good	0.936318	In	644	0.00531364	0.993314
898	Fuberidazole	3	3	3	Good	0.935893	In	70	0.0289212	0.97837
443	Cyanophos	3	3	3	Good	0.934624	In	509	0.00673698	0.993837
1204	Molinate	3	3	3	Good	0.931028	In	292	0.0098542	0.988414
1166	Methoprotryne	3	3	3	Good	0.92896	In	372	0.0170914	0.980824
1124	Mefluidide	3	3	3	Good	0.928382	In	37	0.00932156	0.990677
1638	Tribenuron	3	3	3	Good	0.928003	In	1236	0.0205935	0.980956
864	Flurenol-butyl	3	3	3	Good	0.926812	In	354	0.0365809	0.932603
291	Carbamorph	3	3	3	Good	0.926666	In	1236	0.0339009	0.969267
403	Cloethocarb	3	3	3	Good	0.925514	In	615	0.00847683	0.989639
635	Ditalimfos	3	3	3	Good	0.923093	In	292	0.0166788	0.986369
1491	Simeton	3	3	3	Good	0.922791	In	644	0.0062575	0.994261
269	Butopyronoxyl	3	3	3	Good	0.922366	In	379	0.0342714	0.945688
556	Dicrotophos	3	3	3	Good	0.922243	In	114	0.0282629	0.964832
891	Formparanate	3	3	3	Good	0.921724	In	689	0.00688934	0.992487
757	Fenquinotrione	3	3	3	Good	0.921312	In	1039	0.0512264	0.941188
1542	Tebupirimfos	3	3	3	Good	0.920642	In	681	0.0115815	0.987893
1584	Thifensulfuron	3	3	3	Good	0.920388	In	50	0.0395786	0.96615
1378	Propham	3	3	3	Good	0.919257	In	1233	0.00589655	0.993128
187	Benzamorf	3	3	3	Good	0.918889	In	583	0.0617945	0.913964
563	Diethofencarb	3	3	3	Good	0.916862	In	15	0.00836991	0.991087
1594	Thiophanate	3	3	3	Good	0.91679	In	532	0.034262	0.964782
451	Cycloate	3	3	3	Good	0.916216	In	292	0.0203813	0.977958
1034	Isopolinate	3	3	3	Good	0.915153	In	509	0.00900892	0.991875
1187	Metolcarb	3	3	3	Good	0.914102	In	689	0.00365319	0.995979
1171	Methyl ether cellulose	3	3	3	Good	0.913874	In	556	0.0568042	0.912467
404	Clofencet	3	3	3	Good	0.913821	In	985	0.0496347	0.961596
160	Benazolin-dimethylammonium	3	3	3	Good	0.913483	In	190	0.0820689	0.944866
1454	Quinalphos	3	3	3	Good	0.912309	In	1234	0.0146074	0.984558
709	Etrimfos	3	3	3	Good	0.912004	In	612	0.00395827	0.995607
186	Benzamacril isobutyl	3	3	3	Good	0.91185	In	1234	0.0178742	0.979351
1046	Isoxaben	3	3	3	Good	0.911113	In	292	0.0170082	0.981786
1643	Trichlamide	3	3	3	Good	0.908411	In	61	0.0584315	0.944018
164	Benclothiaz	3	3	3	Good	0.907272	In	1251	0.0311629	0.96816
1420	Pyrazosulfuron	3	3	3	Good	0.907182	In	147	0.0270175	0.975779
1138	Metalaxyl	3	3	3	Good	0.905802	In	265	0.0121188	0.987868
1139	Metalaxyl-M	3	3	3	Good	0.905802	In	265	0.0121188	0.987868
1590	Thiofanox	3	3	3	Good	0.905375	In	972	0.0404137	0.953952
1371	Propamocarb	3	3	3	Good	0.903485	In	430	0.0619397	0.922864
614	Dinoterb	3	3	3	Good	0.903199	In	985	0.0589723	0.941349
267	Butocarboxim	3	3	3	Good	0.902585	In	430	0.0495792	0.937154
1068	Lavandulyl senecioate	3	3	3	Good	0.90227	In	1152	0.0399652	0.944388
1611	Tolprocarb	3	3	3	Good	0.902237	In	634	0.0104648	0.988558
873	Fluthiacet	3	3	3	Good	0.901503	In	340	0.0264045	0.97189
613	Dinotefuran	3	3	3	Good	0.899677	In	532	0.0239441	0.974995
1195	Metsulfuron	3	3	3	Good	0.899468	In	80	0.023357	0.979226
1295	Penfluron	3	3	3	Good	0.898718	In	545	0.0311465	0.962178
1134	Mesosulfuron	3	3	3	Good	0.8975	In	59	0.0292008	0.97226
984	Imicyafos	3	3	3	Good	0.897301	In	189	0.0367161	0.959334
1524	Sulfometuron	3	3	3	Good	0.896845	In	50	0.0396924	0.964011
1672	Triprene	3	3	3	Good	0.896578	In	248	0.043303	0.93256
1489	Simazine	3	3	3	Good	0.895362	In	552	0.00290259	0.996502
515	Diamidaphos	3	3	3	Good	0.895348	In	634	0.0104373	0.989347
741	Fenothiocarb	3	3	3	Good	0.895178	In	1247	0.0204266	0.974206
352	Chlorimuron	3	3	3	Good	0.894805	In	176	0.0245142	0.979047
1001	Iodosulfuron	3	3	3	Good	0.893512	In	985	0.0680916	0.93722
56	4-aminopyridine	3	3	3	Good	0.893376	In	102	0.0221027	0.978513
859	Flupyrsulfuron	3	3	3	Good	0.890543	In	1086	0.0327376	0.972976
1482	Sethoxydim	3	3	3	Good	0.890125	In	292	0.0229606	0.982566
1452	Quinacetol	3	3	3	Good	0.889688	In	513	0.0635662	0.943625
1146	Metazosulfuron	3	3	3	Good	0.888387	In	292	0.0175553	0.986453
81	Aldicarb	3	3	3	Good	0.888359	In	441	0.0613705	0.926441
20	1,3-dinitrobenzene	3	3	3	Good	0.88819	In	689	0.00512814	0.995911
1163	Methocrotophos	3	3	3	Good	0.887434	In	114	0.0427441	0.947896
230	Bromacil	3	3	3	Good	0.887334	In	689	0.00641378	0.992877
231	Bromacil-dimethylammonium	3	3	3	Good	0.887334	In	689	0.00641378	0.992877
1249	Norbormide	3	3	3	Good	0.886489	In	540	0.0593145	0.92675
120	Amitrole	3	3	3	Good	0.886102	In	105	0.0312745	0.975481
1597	Thiosultap	3	3	3	Good	0.884269	In	36	0.0694802	0.866475
143	Azimsulfuron	3	3	3	Good	0.883927	In	292	0.0154259	0.986086
1340	Pirimicarb	3	3	3	Good	0.883451	In	586	0.00678066	0.992894
747	Fenoxycarb	3	3	3	Good	0.881707	In	644	0.00459353	0.995855
1287	Parathion-methyl	3	3	3	Good	0.88016	In	372	0.0149171	0.984787
1366	Promecarb	3	3	3	Good	0.880132	In	644	0.00519979	0.994156
150	Azoluron	3	3	3	Good	0.879393	In	586	0.00353329	0.995937
418	Clothianidin	3	3	3	Good	0.878966	In	532	0.0120757	0.987613
484	Cyprosulfamide	3	3	3	Good	0.878584	In	292	0.0123826	0.987993
473	Cypendazole	3	3	3	Good	0.876928	In	598	0.0430501	0.954041
982	Imazosulfuron	3	3	3	Good	0.875778	In	292	0.0149809	0.98514
349	Chlorflurenol	3	3	3	Good	0.875214	In	1035	0.110525	0.829553
731	Fenitrothion	3	3	3	Good	0.871817	In	661	0.00645319	0.992652
417	Cloransulam	3	3	3	Good	0.869941	In	726	0.0245065	0.978356
657	Epichlorohydrin	3	3	3	Good	0.869402	In	326	0.0253112	0.966798
80	Alanycarb	3	3	3	Good	0.868869	In	292	0.0114596	0.985742
972	Imazamox	3	3	3	Good	0.867638	In	176	0.0299815	0.977572
841	Fluoroglycofen	3	3	3	Good	0.864214	In	61	0.0350537	0.963328
293	Carbaryl	3	3	3	Good	0.863985	In	769	0.0079949	0.991797
1337	Piperophos	3	3	3	Good	0.863194	In	532	0.0140769	0.987951
1492	Simetryn	3	3	3	Good	0.863049	In	661	0.00708616	0.991647
1048	Isoxadifen	3	3	3	Good	0.861111	In	806	0.0313861	0.963143
1081	Maleic hydrazide choline	3	3	3	Good	0.860324	In	125	0.0949577	0.905821
1003	Iofensulfuron	3	3	3	Good	0.859807	In	532	0.0134421	0.984133
981	Imazethapyr ammonium	3	3	3	Good	0.85964	In	292	0.0110164	0.986906
1174	Methyl nonyl ketone	3	3	3	Good	0.858148	In	556	0.0739607	0.894916
1164	Methomyl	3	3	3	Good	0.857356	In	682	0.0433581	0.956154
133	Asomate	3	3	3	Good	0.857151	In	326	0.0212579	0.97164
957	Hexylene glycol	3	3	3	Good	0.856814	In	375	0.0287726	0.964026
674	Ethametsulfuron-methyl	3	3	3	Good	0.856362	In	606	0.0371233	0.960384
832	Flumorph	3	3	3	Good	0.856325	In	532	0.00646796	0.992395
672	Ethaboxam	3	3	3	Good	0.856301	In	606	0.037097	0.955786
171	Benoxacor	3	3	3	Good	0.855639	In	292	0.01485	0.982158
886	Forchlorfenuron	3	3	3	Good	0.854784	In	93	0.00498093	0.994842
1084	Malic acid	3	3	3	Good	0.854254	In	993	0.0806885	0.882853
144	Azinphos-ethyl	3	3	3	Good	0.853991	In	606	0.0351398	0.959951
1108	Mecarbinzid	3	3	3	Good	0.853071	In	606	0.0360515	0.957067
180	Benthiavalicarb-isopropyl	3	3	3	Good	0.85238	In	292	0.00677827	0.992602
682	Ethion	3	3	3	Good	0.852319	In	248	0.0421659	0.940369
314	Chloral hydrate	3	3	3	Good	0.852316	In	375	0.0323628	0.963636
78	Afidopyropen	3	3	3	Good	0.852051	In	540	0.0476196	0.937634
821	Flufenpyr	3	3	3	Good	0.85095	In	340	0.0298161	0.966465
179	Benthiavalicarb	3	3	3	Good	0.850036	In	176	0.025051	0.978607
1290	Pefurazoate	3	3	3	Good	0.849657	In	589	0.0430591	0.961177
598	Dimidazon	3	3	3	Good	0.848833	In	606	0.032746	0.963413
1593	Thionazin	3	3	3	Good	0.847138	In	319	0.0244996	0.96474
1587	Thiocyclam	3	3	3	Good	0.84622	In	1251	0.0340788	0.961564
1589	Thiodicarb	3	3	3	Good	0.84622	In	1251	0.0340788	0.961564
282	Calcium carbide	3	2	3	Good	0.8456	In	1149	0.063044	0.79795
683	Ethiozin	3	3	3	Good	0.842354	In	93	0.00614956	0.99323
430	Coumafuryl	3	3	3	Good	0.842232	In	248	0.0364414	0.950376
1021	Isocarbophos	3	3	3	Good	0.841335	In	16	0.00738467	0.992323
276	Cacodylic acid	3	2	3	Good	0.840635	In	974	0.0894844	0.829747
989	Inabenfide	3	3	3	Good	0.840635	In	726	0.0348135	0.965007
1190	Metoxadiazone	3	3	3	Good	0.840434	In	93	0.00531454	0.99342
803	Flucarbazone-sodium	3	3	3	Good	0.840272	In	589	0.028435	0.96267
1457	Quinmerac	3	3	3	Good	0.840109	In	985	0.0295576	0.966096
685	Ethirimol	3	3	3	Good	0.839523	In	292	0.00793925	0.990952
1612	Tolpyralate	3	3	3	Good	0.837549	In	115	0.0528698	0.944359
1667	Triforine	3	3	3	Good	0.834883	In	265	0.00762772	0.990873
394	Ciobutide	3	3	3	Good	0.833365	In	16	0.00829534	0.990413
975	Imazapyr	3	3	3	Good	0.833296	In	191	0.0234372	0.977111
1213	Monuron-TCA	3	3	3	Good	0.833131	In	207	0.0877834	0.921452
1681	Vamidothion	3	3	3	Good	0.832602	In	726	0.0615849	0.949722
897	Fosthietan	3	3	3	Good	0.832395	In	532	0.0199813	0.976584
1499	Sodium lignosulfonate	3	3	3	Good	0.831417	In	327	0.0485199	0.921387
1500	Sodium metabisulphite	3	3	3	Good	0.831417	In	327	0.0485199	0.921387
333	Chloretazate	3	3	3	Good	0.831169	In	985	0.0335553	0.965225
1207	Monocrotophos	3	3	3	Good	0.829977	In	726	0.04749	0.9526
1090	Mazidox	3	3	3	Good	0.825832	In	1251	0.0534981	0.932567
985	Imidacloprid	3	3	3	Good	0.825681	In	292	0.0153873	0.983847
1507	Sodium tetrathiocarbonate	3	3	3	Good	0.824999	In	543	0.0448841	0.951503
170	Benomyl	3	3	3	Good	0.824337	In	782	0.0113337	0.985551
694	Ethoxysulfuron	3	3	3	Good	0.822805	In	16	0.00493292	0.994419
498	Dehydroacetic acid	3	3	3	Good	0.822782	In	638	0.0219971	0.964939
1125	Menazon	3	3	3	Good	0.820999	In	737	0.0296948	0.967983
1607	Tirpate	3	2	3	Good	0.82075	In	1176	0.0578005	0.943376
939	Haloxyfop	3	3	3	Good	0.816254	In	61	0.0586498	0.955357
941	Haloxyfop-P	3	3	3	Good	0.816254	In	61	0.0586498	0.955357
204	Bicyclopyrone	3	3	3	Good	0.815357	In	80	0.0235403	0.978403
1627	Triafamone	3	3	3	Good	0.814094	In	292	0.0129552	0.984164
1180	Methylisothiazoline	3	3	3	Good	0.810854	In	152	0.0740639	0.910787
920	Glyodin	3	3	3	Good	0.808828	In	532	0.0161356	0.982374
896	Fosthiazate	3	3	3	Good	0.807753	In	286	0.0381758	0.967268
1199	Mexacarbate	3	3	3	Good	0.805193	In	372	0.00769173	0.990973
27	1-naphthylacetamide	3	3	3	Good	0.805065	In	261	0.0143734	0.985803
1633	Triasulfuron	3	3	3	Good	0.803764	In	1247	0.00756801	0.991258
87	Alloxydim	3	3	3	Good	0.803713	In	589	0.0461675	0.954636
381	Chlorthal	3	3	3	Good	0.80284	In	1210	0.0667812	0.863347
88	Alloxydim sodium	3	3	3	Good	0.802786	In	589	0.0459847	0.955541
639	Dixanthogen	3	3	3	Good	0.802305	In	583	0.0435661	0.944984
1392	Prothidathion	3	3	3	Good	0.800938	In	637	0.0156134	0.983586
420	Cloxyfonac-sodium	3	3	3	Good	0.800871	In	1152	0.0564348	0.905784
419	Cloxyfonac	3	3	3	Good	0.800549	In	1152	0.0572146	0.904016
383	Chlorthal-monomethyl	3	3	3	Good	0.799785	In	1210	0.0685447	0.862368
903	Furalaxyl	3	3	3	Good	0.799209	In	666	0.0173657	0.979788
976	Imazaquin	3	3	3	Good	0.798166	In	40	0.0184282	0.977715
1493	Sintofen	3	3	3	Good	0.79678	In	806	0.0333251	0.958565
472	Cyometrinil	3	3	3	Good	0.796406	In	799	0.0195533	0.978992
491	Dazomet	3	3	3	Good	0.794895	In	806	0.0254861	0.968066
1242	Nitrilacarb	3	3	3	Good	0.794743	In	1039	0.0256201	0.968209
502	Demephion-O	3	3	3	Good	0.79426	In	1152	0.0275132	0.959141
239	Bromomethane	3	2	3	Good	0.794105	In	1149	0.0563707	0.810878
1668	Triisopropanolamine	3	3	3	Good	0.793123	In	85	0.0985038	0.90375
1056	Kaolin	3	2	3	Good	0.792285	In	1149	0.0560824	0.81189
1129	Mephosfolan	3	3	3	Good	0.791828	In	37	0.0108466	0.988774
101	Amibuzin	3	3	3	Good	0.789787	In	1247	0.0134469	0.985223
1107	Mecarbam	3	3	3	Good	0.789764	In	1180	0.0277052	0.96753
108	Aminocarb	3	3	3	Good	0.788585	In	1070	0.0167526	0.982506
758	Fenridazon	3	3	3	Good	0.788536	In	1153	0.0605923	0.950546
1670	Trinexapac-ethyl	3	3	3	Good	0.788534	In	346	0.0637376	0.900286
53	2-naphthyloxyacetic acid	3	3	3	Good	0.786544	In	183	0.0374506	0.943918
1251	Nornicotine	3	3	3	Good	0.786402	In	589	0.0230765	0.971611
900	Fumaric acid	3	3	3	Good	0.780365	In	556	0.0486577	0.925573
712	Fenaminosulf	3	3	3	Good	0.780266	In	828	0.0101355	0.990277
1664	Triflusulfuron	3	3	3	Good	0.780085	In	806	0.0336152	0.95769
1690	Xylylcarb	3	3	3	Good	0.778897	In	661	0.0156408	0.981782
771	Fenuron	3	3	3	Good	0.778294	In	1070	0.0111037	0.986591
812	Fludioxonil	3	3	3	Good	0.778145	In	513	0.0183385	0.977844
1266	Oryzalin	3	3	3	Good	0.77789	In	1070	0.0104871	0.987821
863	Flurenol	3	3	3	Good	0.777335	In	383	0.0374887	0.935308
618	Dioxathion	3	3	3	Good	0.773985	In	605	0.0459098	0.93622
1508	Sorbitol	3	3	3	Good	0.773762	In	36	0.0528615	0.893216
32	2,2-dibromo-3-nitrilopropionamide	3	3	3	Good	0.773742	In	1180	0.0588294	0.9439
28	1-naphthylacetic acid	3	3	3	Good	0.773736	In	146	0.0147626	0.979461
1159	Methiopyrsulfuron	3	3	3	Good	0.773672	In	1250	0.0423578	0.960231
513	Dialifos	3	3	3	Good	0.773652	In	402	0.0121213	0.989468
177	Bentaluron	3	3	3	Good	0.77297	In	637	0.016209	0.981716
33	2,3,5-tri-iodobenzoic acid	3	3	3	Good	0.772402	In	1152	0.0352186	0.941168
580	Dimefox	3	3	3	Good	0.770891	In	985	0.0162062	0.986852
453	Cycloheximide	3	3	3	Good	0.769031	In	1086	0.0227005	0.979038
1143	Metamitron	3	3	3	Good	0.768842	In	292	0.017927	0.986451
722	Fenchlorazole	3	3	3	Good	0.767922	In	1232	0.0475691	0.944657
1014	Iprovalicarb	3	3	3	Good	0.767152	In	666	0.0144474	0.981646
828	Flumiclorac	3	3	3	Good	0.767125	In	1180	0.0433113	0.955815
1383	Propoxur	3	3	3	Good	0.766127	In	1070	0.00912577	0.989928
888	Formetanate	3	3	3	Good	0.765351	In	1070	0.00997978	0.987664
1000	Iodomethane	3	2	3	Good	0.764042	In	1149	0.0525312	0.818621
277	Cadusafos	3	3	3	Good	0.763412	In	1237	0.0468452	0.921346
1419	Pyrazophos	3	3	3	Good	0.76089	In	828	0.00978723	0.991925
1640	Tribufos	3	3	3	Good	0.760448	In	844	0.0390873	0.946937
702	Ethylenediamine tetraacetic acid	3	3	3	Good	0.760059	In	627	0.0888958	0.85717
965	Hyquincarb	3	3	3	Good	0.758839	In	634	0.010967	0.988665
1634	Triazamate	3	3	3	Good	0.758341	In	637	0.00664606	0.992508
783	Flazasulfuron	3	3	3	Good	0.756971	In	634	0.0117966	0.986693
774	Ferbam	3	3	3	Good	0.755528	In	218	0.0666333	0.903818
490	Daminozide	3	3	3	Good	0.755336	In	46	0.0408919	0.948713
678	Ethephon	3	3	3	Good	0.75508	In	611	0.0729791	0.886845
36	2,4,5-trichlorophenoxyacetic acid	3	3	3	Good	0.754277	In	611	0.0727649	0.882076
250	Bronopol	3	3	3	Good	0.751892	In	145	0.0468413	0.926609
281	Calcium arsenate	3	2	3	Good	0.751462	In	1149	0.0469751	0.874631
311	Chinomethionat	3	3	3	Good	0.74842	In	726	0.0619513	0.92906
1156	Methfuroxam	3	3	3	Good	0.748418	In	637	0.0202289	0.980184
1261	Olein	3	3	3	Good	0.747808	In	975	0.0782952	0.855131
980	Imazethapyr	3	3	3	Good	0.747039	In	81	0.0393607	0.960049
1350	Primisulfuron methyl	3	3	3	Good	0.744515	In	666	0.0112529	0.986617
1151	Methabenzthiazuron	3	3	3	Good	0.744017	In	634	0.0160859	0.981406
459	Cycloxydim	3	3	3	Good	0.743135	In	637	0.00717956	0.991329
1234	Nickel bis(dimethyldithiocarbamate)	3	3	3	Good	0.743075	In	218	0.0661296	0.90078
50	2-methoxyethylmercury acetate	3	3	3	Good	0.742642	In	611	0.0654857	0.921161
1596	Thioquinox	3	3	3	Good	0.742025	In	985	0.0432076	0.951521
1144	Metarylpicoxamid	3	3	3	Good	0.740568	In	637	0.0143947	0.983333
973	Imazapic	3	3	3	Good	0.74005	In	1092	0.0288379	0.971085
974	Imazapic-ammonium	3	3	3	Good	0.74005	In	1092	0.0288379	0.971085
762	Fenthiaprop	3	3	3	Good	0.739955	In	61	0.0214209	0.977447
1260	Ofurace	3	3	3	Good	0.739887	In	637	0.014428	0.985266
1380	Propineb	3	3	3	Good	0.739177	In	985	0.0565593	0.94367
137	Athidathion	3	3	3	Good	0.738531	In	513	0.016255	0.983202
1496	Sodium 5-nitroguaiacolate	3	3	3	Good	0.738319	In	957	0.00924141	0.990993
486	Cyromazine	3	3	3	Good	0.737205	In	261	0.0192368	0.983391
744	Fenoxaprop-P	3	3	3	Good	0.736906	In	61	0.0236782	0.975695
395	Cisanilide	3	3	3	Good	0.735654	In	637	0.0147843	0.984075
15	1,2-benzisothiazolin-3-one	3	3	3	Good	0.735569	In	828	0.0139333	0.988908
247	Brompyrazon	3	3	3	Good	0.734889	In	666	0.0141298	0.98392
1059	Karbutilate	3	3	3	Good	0.73451	In	93	0.0199089	0.979695
408	Clofop	3	3	3	Good	0.732936	In	1237	0.0540537	0.919284
458	Cycloxaprid	3	3	3	Good	0.732819	In	540	0.031653	0.964695
1687	XMC	3	3	3	Good	0.732702	In	661	0.0180181	0.980857
923	Glyphosate-isopropylamine	3	3	3	Good	0.731523	In	611	0.0465659	0.923955
802	Flucarbazone	3	3	3	Good	0.730916	In	666	0.0148641	0.983119
570	Difenoxuron	3	3	3	Good	0.730886	In	828	0.00963647	0.989403
118	Amiton oxalate	3	3	3	Good	0.730704	In	556	0.0327538	0.944943
1271	Oxamyl	3	3	3	Good	0.730286	In	58	0.040105	0.965235
37	2,4-D	3	3	3	Good	0.729982	In	259	0.0368079	0.939055
39	2,4-D-dimethylammonium	3	3	3	Good	0.729982	In	259	0.0368079	0.939055
1245	N-methyl saccharine	3	3	3	Good	0.728424	In	806	0.0473537	0.951997
102	Amicarbazone	3	3	3	Good	0.724907	In	1235	0.0156831	0.982313
1194	Metsulfovax	3	3	3	Good	0.724536	In	1235	0.00991809	0.989122
728	Fenfuram	3	3	3	Good	0.721875	In	1247	0.0160255	0.982009
316	Chloramben	3	3	3	Good	0.721581	In	58	0.121978	0.890321
1503	Sodium o-nitrophenolate	3	3	3	Good	0.720948	In	97	0.00368816	0.996454
704	Ethylmercury bromide	3	2	3	Good	0.719386	In	1149	0.0469307	0.830399
911	Furmecyclox	3	3	3	Good	0.718694	In	637	0.0105549	0.987864
568	Difenopenten	3	3	3	Good	0.717836	In	1237	0.0283149	0.949363
509	Desmedipham	3	3	3	Good	0.717012	In	97	0.00990574	0.98916
167	Benfuracarb	3	3	3	Good	0.716221	In	795	0.0201856	0.977799
1577	Thiazafluron	3	3	3	Good	0.715972	In	637	0.014251	0.984955
786	Flonicamid	3	3	3	Good	0.715084	In	261	0.018517	0.980552
1526	Sulfosulfuron	3	3	3	Good	0.714214	In	286	0.00775457	0.990343
1639	Tribenuron-methyl	3	3	3	Good	0.71392	In	1235	0.0147602	0.982124
631	Disul	3	3	3	Good	0.712718	In	145	0.0666127	0.922846
38	2,4-DB	3	3	3	Good	0.712467	In	537	0.0753807	0.880627
922	Glyphosate-dimethylammonium	3	3	3	Good	0.710774	In	382	0.0658771	0.872164
1104	MCPB	3	3	3	Good	0.709873	In	558	0.0365839	0.946233
147	Azithiram	3	3	3	Good	0.709869	In	409	0.0368991	0.943449
1404	Pyracarbolid	3	3	3	Good	0.709843	In	93	0.017618	0.981945
68	Acibenzolar-S-methyl	3	3	3	Good	0.7098	In	1070	0.012907	0.985312
1528	Sulfoxaflor	3	3	3	Good	0.702717	In	1234	0.0142898	0.986222
1599	Thiram	3	3	3	Good	0.701583	In	409	0.0361902	0.951098
1646	Triclopyr	3	3	3	Good	0.701515	In	58	0.101019	0.91403
297	Carbofuran	3	3	3	Good	0.699676	In	666	0.0167786	0.979283
174	Bensulfuron-methyl	3	3	3	Good	0.698244	In	1234	0.016301	0.982486
1016	Isamidofos	3	3	3	Good	0.695676	In	1235	0.0155458	0.981152
59	Acephate	3	3	3	Good	0.695172	In	58	0.0268846	0.974638
916	Glufosinate-ammonium	3	3	3	Good	0.694779	In	58	0.110631	0.900319
303	Carboxazole	3	3	3	Good	0.694645	In	1070	0.0151259	0.986635
266	Buthiuron	3	3	3	Good	0.69362	In	286	0.0113521	0.986853
415	Clopyralid-olamine	3	3	3	Good	0.69265	In	696	0.0879812	0.89135
1410	Pyramat	3	3	3	Good	0.691854	In	1070	0.0125591	0.98618
910	Furilazole	3	3	3	Good	0.690541	In	116	0.0209564	0.973027
679	Ethidimuron	3	3	3	Good	0.68972	In	513	0.0612845	0.952824
1210	Monosulfuron	3	3	3	Good	0.689561	In	828	0.00596498	0.993169
165	Bendiocarb	3	3	3	Good	0.689152	In	795	0.00442914	0.995061
1264	Orthosulfamuron	3	3	3	Good	0.688911	In	1235	0.0102772	0.989115
99	Ametridione	3	3	3	Good	0.686593	In	97	0.0106528	0.98707
1319	Phosmet	3	3	3	Good	0.686096	In	666	0.0105626	0.989951
1583	Thiencarbazone-methyl	3	3	3	Good	0.685788	In	442	0.00530279	0.993931
1094	MCPA-dimethylammonium	3	3	3	Good	0.685464	In	556	0.0751199	0.890937
1095	MCPA-diolamine	3	3	3	Good	0.685421	In	556	0.0758216	0.890219
1015	IPSP	3	3	3	Good	0.680767	In	1237	0.0380272	0.939346
1239	Nithiazine	3	3	3	Good	0.679695	In	513	0.0110374	0.988315
534	Dichlorprop-dimethylammonium	3	3	3	Good	0.677729	In	1149	0.13057	0.619366
295	Carbendazim	3	3	3	Good	0.677208	In	76	0.010371	0.991621
1565	Tetradifon	3	3	3	Good	0.675231	In	1237	0.0266178	0.950745
1566	Tetraethyl pyrophosphate	3	3	3	Good	0.675231	In	1237	0.0266178	0.950745
1657	Trifloxysulfuron	3	3	3	Good	0.674753	In	321	0.00994203	0.989116
688	Ethohexadiol	3	3	3	Good	0.674383	In	375	0.0638473	0.908718
860	Flupyrsulfuron-methyl-sodium	3	3	3	Good	0.673667	In	666	0.00692361	0.992657
1078	Lythidathion	3	3	3	Good	0.67281	In	1073	0.0470601	0.949556
452	Cyclohexanone	3	3	3	Good	0.672728	In	1237	0.0343343	0.939912
522	Dicamba diglycolamine	3	3	3	Good	0.67263	In	1149	0.127865	0.612429
1136	Mesotrione	3	3	3	Good	0.672268	In	795	0.0139663	0.989089
1595	Thiophanate-methyl	3	3	3	Good	0.672111	In	1073	0.055431	0.943108
1400	Pydanon	3	3	3	Good	0.671566	In	58	0.0551713	0.941615
1525	Sulfometuron-methyl	3	3	3	Good	0.670187	In	666	0.00516174	0.99445
532	Dichlorprop	3	3	3	Good	0.670079	In	626	0.0541756	0.917865
537	Dichlorprop-P	3	3	3	Good	0.670079	In	626	0.0541756	0.917865
541	Dichlorprop-P	3	3	3	Good	0.670079	In	626	0.0541756	0.917865
1416	Pyrazachlor	3	3	3	Good	0.669646	In	261	0.0261118	0.971426
749	Fenpicoxamid	3	3	3	Good	0.669617	In	116	0.00914619	0.989038
1091	MCPA	3	3	3	Good	0.669117	In	558	0.0435639	0.92954
1102	MCPA-olamine	3	3	3	Good	0.669117	In	558	0.0435639	0.92954
322	Chlorazifop	3	3	3	Good	0.668551	In	58	0.095969	0.908238
1	(4-chlorophenoxy)acetic acid	3	3	3	Good	0.667723	In	319	0.0336205	0.950315
521	Dicamba	3	3	3	Good	0.666541	In	626	0.0620217	0.912171
523	Dicamba diolamine	3	3	3	Good	0.666541	In	626	0.0620217	0.912171
856	Flupropanate-sodium	3	3	3	Good	0.666131	In	1152	0.0547175	0.92026
1280	Oxycarboxin	3	3	3	Good	0.665052	In	40	0.0154702	0.983192
1475	Schradan	3	3	3	Good	0.665044	In	666	0.0139146	0.984395
407	Clofibric acid	3	3	3	Good	0.664534	In	319	0.0300707	0.955482
1273	Oxasulfuron	3	3	3	Good	0.664163	In	286	0.0216366	0.973993
857	Flupyradifurone	3	3	3	Good	0.663959	In	1235	0.0204659	0.977019
937	Halosulfuron-methyl	3	3	3	Good	0.663791	In	442	0.00925113	0.98945
677	Ethanol	3	2	3	Good	0.662933	In	1149	0.0394169	0.85697
1504	Sodium p-nitrophenolate	3	3	3	Good	0.662038	In	76	0.0041182	0.996282
198	Benzthiazuron	3	3	3	Good	0.66119	In	1235	0.0169023	0.978964
412	Cloprop	3	3	3	Good	0.659799	In	515	0.0429759	0.935485
636	Dithianon	3	3	3	Good	0.658422	In	589	0.0256454	0.965457
1649	Triclopyr-triethylammonium	3	3	3	Good	0.658192	In	508	0.0609976	0.912908
1111	Mecoprop dimethylammonium	3	3	3	Good	0.657425	In	218	0.044761	0.931235
671	Etem	3	3	3	Good	0.657323	In	726	0.0516015	0.947378
1114	Mecoprop trolamine	3	3	3	Good	0.655596	In	218	0.0393638	0.944159
1285	Paraquat	3	3	3	Good	0.654258	In	1070	0.0125579	0.983964
22	1,4-dioxane	3	3	3	Good	0.654003	In	963	0.0306705	0.960286
1154	Methasulfocarb	3	3	3	Good	0.652476	In	637	0.0159791	0.979932
506	Demeton-S-methyl	3	3	3	Good	0.652238	In	206	0.0355338	0.953135
340	Chlorfenprop	3	3	3	Good	0.65173	In	319	0.0286184	0.95934
1270	Oxadixyl	3	3	3	Good	0.651653	In	1250	0.0141816	0.983808
1471	Rimsulfuron	3	3	3	Good	0.64998	In	40	0.0208228	0.977608
814	Fluensulfone	3	3	3	Good	0.649971	In	1250	0.0126777	0.983038
1029	Isolan	3	3	3	Good	0.649854	In	1250	0.0131287	0.982259
1022	Isocil	3	3	3	Good	0.649289	In	1250	0.0132258	0.982577
1135	Mesosulfuron-methyl	3	3	3	Good	0.649147	In	314	0.0195105	0.980041
1276	Oxine-copper	3	3	3	Good	0.647172	In	97	0.00948111	0.990123
495	Debacarb	3	3	3	Good	0.646473	In	637	0.0155323	0.983317
145	Azinphos-methyl	3	3	3	Good	0.645286	In	666	0.00828427	0.990049
1044	Isouron	3	3	3	Good	0.644635	In	1235	0.0182305	0.978115
136	Asulam sodium	3	3	3	Good	0.639883	In	261	0.023619	0.9711
1193	Metribuzin	3	3	3	Good	0.639778	In	1250	0.0145118	0.982536
393	Cinosulfuron	3	3	3	Good	0.639199	In	589	0.0244087	0.97726
1346	Polybutene	3	3	3	Good	0.63825	In	975	0.0415087	0.911773
184	Benzalkonium chloride	3	3	3	Good	0.637899	In	666	0.0115024	0.98718
1544	Tebuthiuron	3	3	3	Good	0.636793	In	1250	0.0102127	0.986338
135	Asulam	3	3	3	Good	0.636557	In	29	0.0461236	0.955715
51	2-methoxyethylmercury chloride	3	3	3	Good	0.636176	In	610	0.0604428	0.871674
1421	Pyrazosulfuron-ethyl	3	3	3	Good	0.635499	In	442	0.0210545	0.981373
1211	Monosulfuron-methyl	3	3	3	Good	0.634337	In	321	0.00996987	0.98988
304	Carboxin	3	3	3	Good	0.633453	In	1250	0.0113134	0.988534
788	Florpyrauxifen	3	3	3	Good	0.631128	In	58	0.111904	0.898637
444	Cyanthoate	3	3	3	Good	0.629866	In	985	0.0446222	0.956229
1530	Sulphaquinoxaline	3	3	3	Good	0.626095	In	589	0.0394741	0.95609
1148	Metcamifen	3	3	3	Good	0.624982	In	1235	0.0110705	0.986119
448	Cyclanilide	3	3	3	Good	0.624639	In	58	0.114128	0.893935
1585	Thifensulfuron-methyl	3	3	3	Good	0.623924	In	1235	0.00987222	0.987949
216	Bismerthiazol	3	3	3	Good	0.62323	In	116	0.0135359	0.98446
1473	Saisentong	3	3	3	Good	0.62323	In	116	0.0135359	0.98446
690	Ethoxyfen	3	3	3	Good	0.622573	In	1208	0.0228476	0.947534
1110	Mecoprop	3	3	3	Good	0.620179	In	515	0.0415914	0.935098
969	Imazalil sulfate	3	3	3	Good	0.619164	In	508	0.10652	0.853588
1506	Sodium tetraborate pentahydrate	3	2	3	Good	0.61806	In	1149	0.0757708	0.723129
1172	Methyl isobutyl ketone	3	3	3	Good	0.618044	In	389	0.0433969	0.94135
906	Furathiocarb	3	3	3	Good	0.617493	In	1235	0.00495279	0.993367
855	Flupropanate	3	3	3	Good	0.616973	In	909	0.0408173	0.94317
1573	Thiabendazole	3	3	3	Good	0.616662	In	513	0.0237214	0.980033
986	Imidaclothiz	3	3	3	Good	0.616158	In	112	0.0240747	0.974464
885	Foramsulfuron	3	3	3	Good	0.616122	In	314	0.0177743	0.980464
159	Benazolin	3	3	3	Good	0.612844	In	190	0.0519387	0.951349
827	Flumetylsulforim	3	3	3	Good	0.611842	In	116	0.0325142	0.962133
1431	Pyridafol	3	3	3	Good	0.610279	In	637	0.0164113	0.983355
804	Flucetosulfuron	3	3	3	Good	0.607354	In	1235	0.0214132	0.978012
1237	Nicosulfuron	3	3	3	Good	0.60504	In	40	0.0270968	0.968583
1455	Quinclorac	3	3	3	Good	0.603988	In	125	0.0968568	0.909168
918	Glycerin	3	3	3	Good	0.60042	In	34	0.0727235	0.881925
67	Acibenzolar	3	3	3	Good	0.59964	In	261	0.0254247	0.97452
597	Dimexano	3	3	3	Good	0.59822	In	537	0.0738576	0.887493
501	Demephion	3	3	3	Good	0.597952	In	605	0.0545416	0.935918
652	Endothal	3	3	3	Good	0.597175	In	218	0.0238875	0.962871
964	Hymexazol	3	3	3	Good	0.595752	In	29	0.0310585	0.971929
838	Fluoridamid	3	3	3	Good	0.594322	In	76	0.0135991	0.98549
1141	Metam	3	3	3	Good	0.591286	In	174	0.0527823	0.922477
641	Dodecylphenol ethoxylate	3	3	3	Good	0.590602	In	963	0.0450819	0.9424
193	Benzoic acid	3	3	3	Good	0.588724	In	246	0.0212432	0.969571
353	Chlorimuron-ethyl	3	3	3	Good	0.587678	In	1250	0.0145631	0.982338
74	Acrolein	3	2	3	Good	0.586259	In	1149	0.0291878	0.879841
294	Carbasulam	3	3	3	Good	0.585202	In	29	0.0317051	0.971531
1196	Metsulfuron-methyl	3	3	3	Good	0.584995	In	1250	0.0158754	0.97956
1384	Propoxycarbazone	3	3	3	Good	0.583575	In	1250	0.0152455	0.982922
126	Ampropylfos	3	3	3	Good	0.582414	In	177	0.0490499	0.950804
336	Chlorfenac	3	3	3	Good	0.581983	In	145	0.0979663	0.856618
350	Chlorflurenol methyl	3	3	3	Good	0.580486	In	893	0.0773887	0.887311
163	Bencarbazone	3	3	3	Good	0.579277	In	116	0.0442451	0.947932
1020	Isocarbamid	3	3	3	Good	0.578902	In	29	0.0470412	0.956838
1214	Morfamquat	3	3	3	Good	0.57654	In	314	0.0294487	0.965245
1215	Morfamquat dichloride	3	3	3	Good	0.57654	In	314	0.0294487	0.965245
109	Aminocyclopyrachlor	3	3	3	Good	0.576521	In	190	0.0850073	0.932493
734	Fenoprop	3	3	3	Good	0.57486	In	145	0.0869202	0.867719
34	2,3,6-TBA	3	3	3	Good	0.57097	In	145	0.1022	0.84835
850	Flupentiofenox	3	3	3	Good	0.570431	In	383	0.016517	0.971886
703	Ethylicin	3	3	3	Good	0.568544	In	605	0.0510247	0.938417
1642	Tricamba	3	3	3	Good	0.568487	In	145	0.0988041	0.856181
653	Endothion	3	3	3	Good	0.567594	In	556	0.0669105	0.890023
1157	Methidathion	3	3	3	Good	0.56728	In	29	0.0301774	0.971302
196	Benzoylprop	3	3	3	Good	0.567162	In	1232	0.0476278	0.94516
1575	Thiamethoxam	3	3	3	Good	0.56713	In	637	0.0219745	0.97645
993	Indolauxipyr	3	3	3	Good	0.56488	In	726	0.0702343	0.926955
1121	Mefenpyr	3	3	3	Good	0.562341	In	58	0.107884	0.896892
91	Alorac	3	3	3	Good	0.562012	In	521	0.0471466	0.926408
1581	Thidiazuron	3	3	3	Good	0.561955	In	40	0.0264276	0.973776
623	Dipotassium phosphonate	3	2	3	Good	0.561441	In	975	0.0633006	0.866669
1079	Malathion	3	3	3	Good	0.561385	In	128	0.0199565	0.968987
646	Ecolyst	3	3	3	Good	0.560873	In	174	0.0613579	0.909888
1030	Isomalathion	3	3	3	Good	0.559783	In	650	0.0306358	0.95072
362	Chloropon	3	3	3	Good	0.558388	In	844	0.0154139	0.977785
1386	Propylene glycol	3	3	3	Good	0.558062	In	34	0.0736592	0.887188
516	Diammonium ethylenebis (dithiocarbamate)	3	3	3	Good	0.557163	In	626	0.0348188	0.953439
1086	Mancopper	3	3	3	Good	0.557163	In	626	0.0348188	0.953439
1089	Maneb	3	3	3	Good	0.557163	In	626	0.0348188	0.953439
1182	Metiram	3	3	3	Good	0.557163	In	626	0.0348188	0.953439
1224	Nabam	3	3	3	Good	0.557163	In	626	0.0348188	0.953439
1693	Zineb	3	3	3	Good	0.557163	In	626	0.0348188	0.953439
1303	Peroxyacetic acid	3	2	3	Good	0.556444	In	1149	0.0399094	0.8338
689	Ethoprophos	3	3	3	Good	0.555117	In	691	0.0435403	0.948419
1396	Prothoate	3	3	3	Good	0.553287	In	909	0.0247975	0.961193
508	Denatonium benzoate	3	3	3	Good	0.55189	In	806	0.0402747	0.95123
547	Diclofop	3	3	3	Good	0.550514	In	486	0.0708573	0.871503
696	Ethyl formate	3	2	3	Good	0.548785	In	1210	0.116862	0.782623
106	Amidosulfuron	3	3	3	Good	0.54859	In	513	0.0262996	0.971326
489	Dalapon	3	3	3	Good	0.54709	In	986	0.0435883	0.931872
1536	TCA-ammonium	3	3	3	Good	0.545744	In	986	0.0487021	0.924952
270	Butoxycarboxim	3	3	3	Good	0.541183	In	1073	0.0376606	0.964532
83	Aldoxycarb	3	3	3	Good	0.538098	In	29	0.0258479	0.975156
1363	Prohexadione	3	3	3	Good	0.533536	In	165	0.0285106	0.956031
1080	Maleic hydrazide	3	3	3	Good	0.532877	In	126	0.0339779	0.970151
1082	Maleic hydrazide potassium	3	3	3	Good	0.532877	In	126	0.0339779	0.970151
867	Fluroxypyr	3	3	3	Good	0.528809	In	207	0.0470815	0.954753
286	Calvinphos	3	3	3	Good	0.527894	In	650	0.0310811	0.962555
1066	Lancotrione	3	3	3	Good	0.527331	In	1191	0.0840994	0.817016
729	Fenhexamid	3	3	3	Good	0.525526	In	1140	0.0406127	0.953122
668	Etacelasil	3	3	3	Good	0.524855	In	668	0.0594321	0.901573
932	Halauxifen	3	3	3	Good	0.524508	In	58	0.105007	0.899178
361	Chloropicrin	3	3	3	Good	0.523624	In	1237	0.0503761	0.922086
142	Azamethiphos	3	3	3	Good	0.522454	In	726	0.090296	0.898389
1644	Trichlorfon	3	3	3	Good	0.520103	In	160	0.0149956	0.97458
806	Fluchloraminopyr	3	3	3	Good	0.516466	In	58	0.0587811	0.94065
181	Bentonite	3	2	3	Good	0.511414	In	1149	0.0422451	0.837711
1685	Vinegar	3	2	3	Good	0.506764	In	1149	0.041475	0.832945
1083	Maleic hydrazide sodium	3	3	3	Good	0.499955	In	177	0.0712624	0.921076
92	Alpha-chlorohydrin	3	3	3	Good	0.494289	In	259	0.0512098	0.916151
48	2-hydrazinoethanol	3	2	3	Good	0.491775	In	560	0.0222483	0.961435
1109	Mecarphon	3	3	3	Good	0.478605	In	61	0.0625033	0.931102
630	Disodium phosphonate	3	3	3	Good	0.477709	In	610	0.087156	0.803169
308	Cartap	3	3	3	Good	0.472762	In	125	0.0404781	0.961656
123	Ammonium sulphamate	3	2	3	Good	0.472326	In	697	0.140839	0.693875
1505	Sodium silver thiosulphate	3	2	3	Good	0.472091	In	697	0.140849	0.693855
1381	Propionic acid	3	2	3	Good	0.471169	In	1149	0.0287262	0.881883
117	Amiton	3	3	3	Good	0.469849	In	650	0.0594509	0.919776
1518	Sulcofuron	3	2	3	Good	0.466678	In	560	0.0489175	0.925025
915	Glufosinate	3	2	3	Good	0.465742	In	643	0.0543075	0.920017
543	Dichlorvos	3	3	3	Good	0.462033	In	650	0.0625989	0.916419
58	ACC	3	3	3	Good	0.461801	In	1191	0.0569148	0.913443
1153	Methamidophos	3	3	3	Good	0.460605	In	177	0.0895363	0.902744
471	Cymoxanil	3	3	3	Good	0.458814	In	177	0.07334	0.90988
1326	Picloram	3	3	3	Good	0.457123	In	207	0.0459155	0.958512
1235	Niclosamide	3	3	3	Good	0.455989	In	1140	0.0626078	0.927629
285	Calcium phosphate	3	3	3	Good	0.455209	In	975	0.0613824	0.876552
776	Ferric phosphate	3	3	3	Good	0.455209	In	975	0.0613824	0.876552
96	Aluminium ammonium sulphate	3	2	3	Good	0.453772	In	1210	0.0848291	0.849895
124	Ammonium sulphate	3	2	3	Good	0.453772	In	1210	0.0848291	0.849895
428	Copper sulphate	3	2	3	Good	0.453772	In	1210	0.0848291	0.849895
629	Diquat dichloride	3	2	3	Good	0.450284	In	1210	0.118491	0.758048
1403	Pymetrozine	3	3	3	Good	0.443505	In	261	0.032389	0.970408
1216	Morphothion	3	3	3	Good	0.44072	In	556	0.068672	0.878124
1671	Trioxymethylene	3	3	3	Good	0.435589	In	963	0.0633128	0.913011
1497	Sodium ferric EDTA	3	3	3	Good	0.431724	In	36	0.0427798	0.911299
215	Bis(methylmercury) sulphate	3	3	3	Good	0.430117	In	174	0.0806151	0.87077
1679	Urea sulphate	3	3	3	Good	0.419778	In	144	0.0696717	0.877164
1529	Sulfuryl fluoride	3	3	3	Good	0.4165	In	1205	0.0447132	0.929217
701	Ethylene urea	3	3	3	Good	0.414741	In	36	0.0585333	0.909071
47	2-butoxyethanol	3	3	3	Good	0.398799	In	259	0.0629058	0.902159
909	Furfural	3	3	3	Good	0.396174	In	668	0.0439987	0.935178
356	Chlormequat	3	3	3	Good	0.379523	In	1210	0.0539545	0.884263
890	Formothion	3	3	3	Good	0.373649	In	34	0.0740003	0.878211
505	Demeton-O-methyl sulfone	3	3	3	Good	0.373386	In	668	0.0268612	0.955056
122	Ammonium carbonate	3	3	3	Good	0.371395	In	610	0.0703894	0.857221
155	Barium carbonate	3	3	3	Good	0.371395	In	610	0.0703894	0.857221
283	Calcium carbonate	3	3	3	Good	0.371395	In	610	0.0703894	0.857221
424	Copper II carbonate	3	3	3	Good	0.371395	In	610	0.0703894	0.857221
554	Dicopper carbonate dihydroxide	3	3	3	Good	0.371395	In	610	0.0703894	0.857221
1073	Limestone	3	3	3	Good	0.371395	In	610	0.0703894	0.857221
507	Demeton-S-methyl sulfone	3	3	3	Good	0.36699	In	668	0.029057	0.9512
63	Acethion	3	3	3	Good	0.366024	In	691	0.0525983	0.933211
219	Bisthiosemi	3	3	3	Good	0.365483	In	521	0.0175146	0.969802
633	Disulfoton sulfoxide	3	3	3	Good	0.365448	In	691	0.052848	0.933061
1072	Lime sulphur	3	3	3	Good	0.361485	In	36	0.0669711	0.863484
65	Acetophos	3	3	3	Good	0.360745	In	691	0.0499414	0.939833
1175	Methylacetophos	3	3	3	Good	0.346053	In	389	0.05757	0.918944
1281	Oxydemeton-methyl	3	3	3	Good	0.342968	In	389	0.0587787	0.915938
1152	Methacrifos	3	3	3	Good	0.338013	In	127	0.0415496	0.930855
1282	Oxydeprofos	3	3	3	Good	0.331897	In	127	0.0376251	0.943535
590	Dimethoate	3	2	3	Good	0.330132	In	34	0.0521118	0.916786
103	Amidithion	3	2	3	Good	0.327701	In	34	0.0499249	0.92302
772	Fenuron-TCA	3	3	3	Good	0.326894	In	177	0.0653261	0.92651
1262	Omethoate	3	2	3	Good	0.321768	In	34	0.0554698	0.91144
914	Gliftor	3	3	3	Good	0.321728	In	35	0.051463	0.928779
1130	Mepiquat	3	3	3	Good	0.321416	In	85	0.0896726	0.909345
1198	Mevinphos	3	3	3	Good	0.318338	In	909	0.0498907	0.926071
686	Ethoate-methyl	3	2	3	Good	0.308253	In	174	0.0858109	0.884264
1179	Methylene bisthiocyanate	3	3	3	Good	0.303899	In	177	0.0764995	0.907008
46	2-aminobutane	3	3	3	Good	0.295814	In	177	0.0664086	0.923107
487	DAEP	3	2	3	Good	0.267897	In	259	0.0811785	0.869493
260	Butan-1-ol	3	2	3	Good	0.189313	In	1210	0.126088	0.723876
1053	Izopamfos	3	2	3	Good	0.166568	In	1176	0.0655975	0.935244
49	2-methoxyethanol	3	2	3	Good	0.0913608	In	975	0.106358	0.789218
10	1,1,1-acetonitrile	3	1	3	Good	0.841995	Outside AD	837	0.0645901	0.863452
16	1,2-dibromoethane	3	1	3	Good	0.529294	Outside AD	974	0.0549704	0.901145
18	1,3-butadiene	3	1	3	Good	0.544559	Outside AD	974	0.0518168	0.902582
61	Acetamide	3	1	3	Good	0.394158	Outside AD	3	0.0527778	0.894497
75	Acrylonitrile	3	1	3	Good	0.242317	Outside AD	560	0.0378698	0.936898
84	Aldrin	3	1	3	Good	4.76243	Outside AD	820	0.0326197	0.972264
89	Allyl alcohol	3	1	3	Good	-0.137884	Outside AD	975	0.138807	0.684036
121	Ammonium acetate	3	1	3	Good	0.457584	Outside AD	3	0.0385499	0.927663
125	Ammonium thiocyanate	3	1	3	Good	0.810893	Outside AD	837	0.0703715	0.853574
280	Calcium acetate	3	1	3	Good	0.505938	Outside AD	3	0.0335119	0.932475
284	Calcium cyanamide	3	1	3	Good	0.967716	Outside AD	610	0.0668571	0.87803
299	Carbon disulphide	3	1	3	Good	0.783821	Outside AD	3	0.0727064	0.849082
309	Cartap hydrochloride	3	1	3	Good	2.56038	Outside AD	857	0.118354	0.864132
329	Chlordane	3	1	3	Good	4.71935	Outside AD	825	0.0265261	0.976751
423	Copper II acetate	3	1	3	Good	0.505938	Outside AD	3	0.0335119	0.932475
425	Copper II chloride	3	1	3	Good	0.540713	Outside AD	3	0.0696274	0.865009
427	Copper oxychloride	3	1	3	Good	0.811866	Outside AD	837	0.0702353	0.853763
440	Cyanamide	3	1	3	Good	0.954425	Outside AD	144	0.0662768	0.89358
517	Diammonium phosphate	3	1	3	Good	1.01203	Outside AD	144	0.0505621	0.910717
545	Diclobutrazol	3	1	3	Good	1.10061	Outside AD	473	0.0250852	0.960267
593	Dimethyl disulfide	3	1	3	Good	0.62553	Outside AD	3	0.0491622	0.922175
675	Ethanedial	3	1	3	Good	0.361014	Outside AD	1149	0.0103253	0.954167
676	Ethanethiol	3	1	3	Good	0.540713	Outside AD	3	0.0696274	0.865009
699	Ethylene dichloride	3	1	3	Good	0.516048	Outside AD	974	0.0540454	0.900952
700	Ethylene glycol	3	1	3	Good	-0.23838	Outside AD	3	0.156474	0.711823
839	Fluoroacetamide	3	1	3	Good	0.429804	Outside AD	974	0.0441005	0.922931
889	Formetanate hydrochloride	3	1	3	Good	2.5593	Outside AD	857	0.118228	0.864229
892	Fosamine	3	1	3	Good	0.813541	Outside AD	974	0.0686394	0.877385
893	Fosetyl	3	1	3	Good	0.406942	Outside AD	974	0.0951887	0.838209
917	Glutaraldehyde	3	1	3	Good	0.479273	Outside AD	974	0.0415528	0.934123
921	Glyphosate	3	1	3	Good	0.856117	Outside AD	974	0.0587608	0.907986
924	Glyphosate-monoammonium	3	1	3	Good	0.856117	Outside AD	974	0.0587608	0.907986
925	Glyphosate-trimesium	3	1	3	Good	0.8578	Outside AD	974	0.0590423	0.906934
944	Heptachlor	3	1	3	Good	4.6562	Outside AD	825	0.0486508	0.96504
1024	Isodrin	3	1	3	Good	4.76243	Outside AD	820	0.0326197	0.972264
1173	Methyl isothiocyanate	3	1	3	Good	0.592092	Outside AD	974	0.0410175	0.923477
1176	Methylarsenic sulphide	3	1	3	Good	0.757304	Outside AD	3	0.0724659	0.850501
1177	Methylarsonic acid	3	1	3	Good	1.06955	Outside AD	144	0.0582122	0.895466
1181	Methylmercury dicyanamide	3	1	3	Good	0.0528176	Outside AD	13	0.078141	0.913787
1201	Mirex	2	1	2	Moderate	4.99338	Outside AD	816	0.0954622	0.911705
1209	Monosodium methylarsonate	3	1	3	Good	1.07214	Outside AD	144	0.0570566	0.891628
1248	N-nitrosodimethylamine	3	1	3	Good	0.44325	Outside AD	974	0.0478742	0.918783
1322	Phosphane	3	1	3	Good	3.38045	Outside AD	821	0.096491	0.817734
1345	Polyacrylamide	3	1	3	Good	0.620401	Outside AD	473	0.0665573	0.897306
1445	Pyripropanol	3	1	3	Good	0.775593	Outside AD	85	0.0641102	0.947926
1501	Sodium monochloroacetate	3	1	3	Good	0.488001	Outside AD	974	0.0333609	0.946223
1502	Sodium monofluoroacetate	3	1	3	Good	0.470839	Outside AD	974	0.0417435	0.928004
1531	Sulphuric acid	3	1	3	Good	1.03654	Outside AD	144	0.0521778	0.902824
1598	Thiourea	3	1	3	Good	0.116614	Outside AD	39	0.0640036	0.868549
User-defined Weightage :
To Score MAE(Loo)	0.2
To Score (AD)	0
To Score (Mean)	0.8
Internal validation metrics:
R^2	0.72731
Q^2(LOO)	0.72315
MAE (95% data)	0.51698

## Sheet: List of deleted compounds
List of deleted compounds
ID	CAS	Standardized	logBCF
253	5586-15-2	S(Sc1ccc2ccccc2c1)c1ccc2ccccc2c1	0.34
297	92-06-8	c1ccc(cc1)-c1cccc(c1)-c1ccccc1	1.33
341	14233-37-5	CC(C)Nc1ccc(NC(C)C)c2C(=O)c3ccccc3C(=O)c12	3.85
344	52303-69-2	CC(C)OC(=O)C(C(=O)OC(C)C)=C1SCCS1=O	-0.79
374	909554	CC(CC(C)(C)C)CC(C)(C)CC(C)(C)C	1.92
432	36437-37-3	CCC(C)c1cc(cc(c1O)-n1nc2ccccc2n1)C(C)(C)C	4.08
446	30171-80-3	BrC(Br)c1ccccc1OCC1CO1	0.61
471	18375-66-1	CCCCCCCCCCCCCCCCCCNC(=O)C(O)C(O)C(O)C(O)CO	2.94
475	2885-00-9	CCCCCCCCCCCCCCCCCCS	-0.04
498	101-67-7	CCCCCCCCc1ccc(Nc2ccc(CCCCCCCC)cc2)cc1	0.58
526	1067-97-6	CCCC[Sn](O)(CCCC)CCCC	3.92
564	962-58-3	CCOP(=O)(OCC)Oc1cc(C)nc(n1)C(C)C	-1
566	2012-00-2	CCOP(=O)(Oc1ccc(cc1)[N+]([O-])=O)c1ccccc1	0.69
709	81-15-2	Cc1c(c(C)c(c(c1[N+]([O-])=O)C(C)(C)C)[N+]([O-])=O)[N+]([O-])=O	3.61
817	77-47-4	ClC1=C(Cl)C(Cl)(Cl)C(Cl)=C1Cl	1.32
848	1667-10-3	ClCc1ccc(cc1)-c1ccc(CCl)cc1	1.19
851	2051-24-3	Clc1c(Cl)c(Cl)c(c(Cl)c1Cl)-c1c(Cl)c(Cl)c(Cl)c(Cl)c1Cl	4.24
854	2234-13-1	Clc1c(Cl)c(Cl)c2c(Cl)c(Cl)c(Cl)c(Cl)c2c1Cl	2.58
855	39001-02-0	Clc1c(Cl)c(Cl)c2c(oc3c(Cl)c(Cl)c(Cl)c(Cl)c23)c1Cl	2.89
892	92296-04-3	CC(Br)C(=O)Nc1c(C)n(C)n(-c2ccccc2)c1=O	-0.2
953	27323-18-8	Clc1ccccc1-c1ccccc1	5.3
1027	208338-50-5	CCCC1CCC(CC1)C1CCC(CC1)C(F)(F)Oc1cc(F)c(F)c(F)c1	1.28
1042	930-10-9	CCCCCCCCCCCCCOCCOCCOCCOCCOCCOCCOCCOCCO	1.5
1052	4-1955	CCCCc1ccc(cc1)-c1ccc(c(F)c1)-c1cc(F)c(c(F)c1)C(F)(F)Oc1cc(F)c(F)c(F)c1	1.41
1063	5-6958	CC[NH+](CC)CCCNc1nc(NCCC[NH+](CC)CC)nc(Nc2ccc3c(O)c(N=Nc4ccc5[nH]c(=O)[nH]c5c4)c(cc3c2)S(O)(=O)=O)n1	1.52
1132	6607	Nc1c(Cl)c(Cl)nc(C(O)=O)c1Cl	-1.7
1182	131983-72-7	CC1(C)CCC(=Cc2ccc(Cl)cc2)C1(O)Cn1cncn1	0.78
1211	84-75-3	CCCCCCOC(=O)c1ccccc1C(=O)OCCCCCC	3.24
1243	nd	COc1c(Cl)c(Cl)c(Cl)c(Cl)c1OC	4.4
1272	117-80-6	ClC1=C(Cl)C(=O)c2ccccc2C1=O	4.04

## Sheet: List of descriptors
List of 856 descriptors	List of 51 descriptors	List of initial pool of descriptors for q-RASPR model development	Final PLS-based q-RASPR model descriptors
MW	MLOGP	MLOGP	RA function(GK)
AMW	Cl-089	Cl-089	Abs MaxPos-MaxNeg
Mp	MaxdO	MaxdO	Avg.Sim(GK)
Mi	Eta_D_epsiD	X1A	gm*SD Similarity
GD	X1A	B03[C-N]	B03[C-N]
nAT	B03[C-N]	MaxsOH
nAA	MaxsOH	RA function(GK)
nTA	B05[N-O]	SD Activity(GK)
SCBO	B04[O-Cl]	SE(GK)
RBN	B06[C-C]	CVact(GK)
RBF	B01[N-O]	CVsim(GK)
nDB	C-006	MaxPos(GK)
nH	B02[Si-Si]	MaxNeg(GK)
nC	B03[C-C]	Abs MaxPos-MaxNeg
nN	NssssC	Avg.Sim(GK)
nO	Eta_psi1	SD similarity(GK)
nP	F03[Br-Br]	gm(GK)[Banerjee-Roy Coefficient]
nS	B05[Br-Br]	gm*Avg.Sim
nBR	F09[Cl-Cl]	gm*SD Similarity
nI	F07[N-Cl]	Pos.Avg.Sim
nHM	B03[N-O]	Neg.Avg.Sim
nHet	nRSSR	logBCF
nX	F01[C-P]
H%	nH
C%	NsssCH
N%	F10[N-S]
O%	LOGPcons
X%	RBN
nCsp3	F09[C-C]
nCsp	F04[C-Cl]
Fsp3	gmax
max_conj_path	GD
totalcharge	B01[C-N]
nCIR	T(Br..Br)
Rperim	C-002
Rbrid	C-025
MCD	F03[O-Cl]
RFD	F08[N-O]
RCI	B02[C-S]
NRS	nArCOOH
NNRS	D/Dtr11
nSpiro	O-057
nBridgeHead	T(N..Cl)
nR03	F03[N-O]
nR04	B08[C-Cl]
nR05	F03[N-F]
nR06	F10[N-Cl]
nR08	F06[C-N]
nR09	F03[C-N]
nR10	F10[O-S]
nR11	F07[C-P]
nR12
ARR
D/Dtr03
D/Dtr05
D/Dtr06
D/Dtr07
D/Dtr08
D/Dtr09
D/Dtr10
D/Dtr11
D/Dtr12
X0
X0A
X1A
X2A
X3A
X4A
X5A
X0v
X2v
X3v
X4v
X0Av
X1Av
X2Av
X3Av
X4Av
X5Av
X2sol
X4sol
RDCHI
Eta_alpha_A
Eta_betaS_A
Eta_betaP
Eta_beta_A
Eta_C
Eta_C_A
Eta_L
Eta_F
Eta_F_A
Eta_FL
Eta_FL_A
Eta_B
Eta_B_A
Eta_sh_p
Eta_sh_y
Eta_sh_x
Eta_D_AlphaA
Eta_D_AlphaB
Eta_epsi_2
Eta_epsi_3
Eta_epsi_4
Eta_epsi_5
Eta_D_epsiA
Eta_D_epsiB
Eta_D_epsiD
Eta_psi1
Eta_D_psiA
Eta_D_psiB
Eta_D_beta
Eta_D_beta_A
nCs
nCt
nCq
nCrs
nCrt
nCrq
nCb-
nCconj
nR=Cp
nR=Cs
nR=Ct
nArNCO
nRCOOH
nArCOOH
nRCOOR
nArCOOR
nRCONH2
nArCONH2
nRCONHR
nArCONHR
nRCONR2
nArCONR2
nROCON
nArOCON
nRCO
nCONN
nN=C-N<
nC(=N)N2
nRC=N
nRCNO
nRNH2
nRNHR
nArNHR
nRNR2
nArNR2
nN-N
nRCN
nArCN
nN+
nNq
nRNHO
nArNO2
nN(CO)2
nC=N-N<
nROH
nArOH
nOHp
nOHs
nOHt
nROR
nArOR
nRSR
nRSSR
nSO
nS(=O)2
nSO2OH
nSO3OH
nPO3
nPO4
nP(=O)O2R
nCH2RX
nCHR2X
nCR3X
nR=CHX
nR=CRX
nCHRX2
nCR2X2
nR=CX2
nCRX3
nArX
nCXr
nCXr=
nCconjX
nOxiranes
nOxolanes
nPyrroles
nPyrazoles
nImidazoles
nFuranes
nThiophenes
nThiazoles
nTriazoles
nPyridines
nPyrimidines
nHDon
nHAcc
C-001
C-002
C-003
C-005
C-006
C-007
C-008
C-009
C-010
C-011
C-013
C-014
C-016
C-018
C-019
C-020
C-025
C-026
C-027
C-028
C-029
C-030
C-031
C-032
C-033
C-034
C-035
C-037
C-038
C-039
C-040
C-041
C-042
C-043
C-044
H-046
H-047
H-048
H-049
H-051
H-052
H-053
H-054
O-056
O-057
O-058
O-059
O-060
O-062
O-063
N-067
N-068
N-069
N-070
N-072
N-073
N-074
N-077
N-078
N-079
F-081
F-083
F-084
F-085
Cl-086
Cl-087
Cl-088
Cl-089
Cl-090
Br-091
Br-092
Br-093
Br-094
S-106
S-107
S-109
S-110
P-117
SsCH3
SdCH2
StCH
SsssCH
SddC
StsC
SdssC
SaasC
SaaaC
SssssC
SssNH
SsssN
SdsN
SssssN+
SddsN
SaasN
SaaNH
SdO
SdsssP
SssS
SdssS
SsCl
NssCH2
NaaCH
NsssCH
NdssC
NaasC
NaaaC
NssssC
NsNH2
NdNH
NsssN
NaaN
NssssN+
NaasN
NsOH
NssO
NaaO
NaaS
NssssSn
minsCH3
minssCH2
minsssCH
mintsC
mindssC
minaasC
minssssC
mintN
minddsN
mindsssP
minsSH
mindS
minssssSn
gmin
MaxdCH2
MaxssCH2
MaxdsCH
MaxaaCH
MaxsssCH
MaxdssC
MaxaasC
MaxaaaC
MaxsNH2
MaxssNH
MaxsssN
MaxdsN
MaxaaN
MaxaasN
MaxsOH
MaxdO
MaxssO
MaxssS
MaxddssS
gmax
T(N..N)
T(N..O)
T(N..S)
T(N..P)
T(N..F)
T(N..Cl)
T(O..S)
T(O..P)
T(O..F)
T(O..Cl)
T(O..Br)
T(O..I)
T(S..P)
T(S..F)
T(S..Cl)
T(S..Br)
T(P..P)
T(P..Cl)
T(F..F)
T(F..Cl)
T(F..Br)
T(Cl..Cl)
T(Cl..Br)
T(Br..Br)
B01[C-C]
B01[C-N]
B01[C-O]
B01[C-S]
B01[C-P]
B01[C-F]
B01[C-Br]
B01[C-I]
B01[C-Si]
B01[C-X]
B01[N-N]
B01[N-O]
B01[N-S]
B01[N-P]
B01[O-O]
B01[O-S]
B01[O-X]
B01[S-S]
B01[S-P]
B01[Cl-X]
B02[C-C]
B02[C-O]
B02[C-S]
B02[C-P]
B02[C-Cl]
B02[C-Si]
B02[C-X]
B02[N-N]
B02[N-O]
B02[N-S]
B02[N-P]
B02[N-F]
B02[N-Cl]
B02[O-O]
B02[O-S]
B02[O-P]
B02[O-F]
B02[S-S]
B02[S-F]
B02[S-Cl]
B02[F-F]
B02[Cl-Cl]
B02[Cl-Br]
B02[Br-Br]
B02[Si-Si]
B03[C-C]
B03[C-N]
B03[C-O]
B03[C-S]
B03[C-F]
B03[C-Cl]
B03[C-Br]
B03[N-N]
B03[N-O]
B03[N-S]
B03[N-P]
B03[N-F]
B03[N-Cl]
B03[N-Br]
B03[O-O]
B03[O-S]
B03[O-F]
B03[O-Cl]
B03[O-Br]
B03[S-S]
B03[S-F]
B03[S-Cl]
B03[F-F]
B03[F-Cl]
B03[F-Br]
B03[Cl-Cl]
B03[Cl-Br]
B03[Br-Br]
B04[C-C]
B04[C-N]
B04[C-O]
B04[C-P]
B04[C-Br]
B04[C-Si]
B04[N-N]
B04[N-O]
B04[N-S]
B04[N-P]
B04[N-F]
B04[N-Cl]
B04[N-Br]
B04[N-X]
B04[O-O]
B04[O-S]
B04[O-P]
B04[O-F]
B04[O-Cl]
B04[O-Br]
B04[O-Si]
B04[S-S]
B04[S-P]
B04[S-F]
B04[S-Cl]
B04[P-Cl]
B04[P-Br]
B04[F-F]
B04[Cl-Cl]
B04[Cl-Br]
B04[Br-Br]
B05[C-C]
B05[C-N]
B05[C-O]
B05[C-S]
B05[C-P]
B05[C-Cl]
B05[C-Br]
B05[C-Si]
B05[C-X]
B05[N-N]
B05[N-O]
B05[N-S]
B05[N-P]
B05[N-F]
B05[N-Cl]
B05[N-Br]
B05[O-O]
B05[O-S]
B05[O-F]
B05[O-Cl]
B05[O-Br]
B05[S-S]
B05[S-F]
B05[S-Cl]
B05[P-Cl]
B05[F-F]
B05[F-Cl]
B05[Cl-Cl]
B05[Cl-Br]
B05[Br-Br]
B06[C-C]
B06[C-N]
B06[C-O]
B06[C-S]
B06[C-P]
B06[C-F]
B06[C-Cl]
B06[C-Br]
B06[C-Si]
B06[C-X]
B06[N-N]
B06[N-O]
B06[N-S]
B06[N-P]
B06[N-Cl]
B06[O-O]
B06[O-S]
B06[O-P]
B06[O-F]
B06[O-Cl]
B06[O-Br]
B06[S-S]
B06[S-P]
B06[S-Cl]
B06[P-Cl]
B06[P-Br]
B06[F-F]
B06[Cl-Cl]
B06[Br-Br]
B07[C-C]
B07[C-N]
B07[C-O]
B07[C-S]
B07[C-P]
B07[C-F]
B07[C-Cl]
B07[C-Br]
B07[C-Si]
B07[N-N]
B07[N-O]
B07[N-S]
B07[N-P]
B07[N-Cl]
B07[O-O]
B07[O-S]
B07[O-P]
B07[O-F]
B07[O-Cl]
B07[O-Br]
B07[S-S]
B07[S-Cl]
B07[F-F]
B07[Cl-Cl]
B07[Br-Br]
B08[C-C]
B08[C-N]
B08[C-O]
B08[C-S]
B08[C-P]
B08[C-Cl]
B08[C-Br]
B08[C-I]
B08[C-Si]
B08[N-N]
B08[N-O]
B08[N-S]
B08[N-Cl]
B08[N-Br]
B08[O-O]
B08[O-S]
B08[O-F]
B08[O-Cl]
B08[S-S]
B08[S-Cl]
B08[F-F]
B08[Cl-Cl]
B08[Br-Br]
B09[C-C]
B09[C-N]
B09[C-O]
B09[C-S]
B09[C-P]
B09[C-F]
B09[C-Cl]
B09[C-Br]
B09[N-N]
B09[N-O]
B09[N-S]
B09[N-F]
B09[N-Cl]
B09[O-O]
B09[O-S]
B09[O-F]
B09[O-Cl]
B09[O-Br]
B09[S-S]
B09[S-F]
B09[F-F]
B09[Cl-Cl]
B09[Br-Br]
B10[C-C]
B10[C-N]
B10[C-O]
B10[C-S]
B10[C-P]
B10[C-F]
B10[C-Cl]
B10[C-Br]
B10[N-N]
B10[N-O]
B10[N-S]
B10[N-Cl]
B10[O-O]
B10[O-S]
B10[O-F]
B10[O-Cl]
B10[S-S]
B10[F-F]
B10[Cl-Cl]
B10[Br-Br]
F01[C-N]
F01[C-O]
F01[C-S]
F01[C-P]
F01[N-N]
F01[N-O]
F01[N-S]
F01[N-P]
F01[O-P]
F01[O-X]
F01[S-S]
F01[S-P]
F02[C-C]
F02[C-N]
F02[C-O]
F02[C-S]
F02[C-X]
F02[N-N]
F02[N-O]
F02[N-S]
F02[N-Cl]
F02[O-O]
F02[O-P]
F02[O-F]
F02[S-S]
F02[S-Cl]
F02[P-P]
F02[F-F]
F02[F-Cl]
F02[Cl-Cl]
F02[Cl-Br]
F02[Br-Br]
F03[C-N]
F03[C-O]
F03[C-S]
F03[C-P]
F03[C-Cl]
F03[C-Br]
F03[C-Si]
F03[C-X]
F03[N-N]
F03[N-O]
F03[N-S]
F03[N-P]
F03[N-F]
F03[N-Cl]
F03[N-Br]
F03[O-O]
F03[O-S]
F03[O-P]
F03[O-F]
F03[O-Cl]
F03[O-Br]
F03[O-Si]
F03[S-S]
F03[Cl-Cl]
F03[Cl-Br]
F03[Br-Br]
F04[C-C]
F04[C-N]
F04[C-O]
F04[C-S]
F04[C-P]
F04[C-Cl]
F04[C-Br]
F04[C-Si]
F04[C-X]
F04[N-N]
F04[N-O]
F04[N-S]
F04[N-F]
F04[N-Cl]
F04[N-Br]
F04[N-X]
F04[O-O]
F04[O-S]
F04[O-F]
F04[O-Cl]
F04[O-Br]
F04[S-Cl]
F04[P-Cl]
F04[P-Br]
F04[F-Cl]
F04[Cl-Cl]
F04[Cl-Br]
F04[Br-Br]
F05[C-N]
F05[C-O]
F05[C-S]
F05[C-P]
F05[C-F]
F05[C-Cl]
F05[C-Br]
F05[C-Si]
F05[N-N]
F05[N-O]
F05[N-S]
F05[N-F]
F05[N-Cl]
F05[N-Br]
F05[O-O]
F05[O-S]
F05[O-P]
F05[O-F]
F05[O-Cl]
F05[O-Br]
F05[S-S]
F05[S-Cl]
F05[Cl-Cl]
F05[Br-Br]
F06[C-C]
F06[C-N]
F06[C-O]
F06[C-S]
F06[C-P]
F06[C-Cl]
F06[C-Br]
F06[C-Si]
F06[N-N]
F06[N-O]
F06[N-S]
F06[N-F]
F06[N-Cl]
F06[O-O]
F06[O-S]
F06[O-F]
F06[O-Cl]
F06[O-Br]
F06[S-Cl]
F06[F-Cl]
F06[Cl-Cl]
F06[Br-Br]
F07[C-C]
F07[C-N]
F07[C-O]
F07[C-S]
F07[C-P]
F07[C-F]
F07[C-Cl]
F07[C-Br]
F07[C-Si]
F07[C-X]
F07[N-N]
F07[N-O]
F07[N-S]
F07[N-F]
F07[N-Cl]
F07[O-O]
F07[O-S]
F07[O-F]
F07[O-Cl]
F07[O-Br]
F07[S-S]
F07[S-Cl]
F07[Cl-Cl]
F07[Br-Br]
F08[C-N]
F08[C-O]
F08[C-S]
F08[C-P]
F08[C-Cl]
F08[C-Br]
F08[C-I]
F08[C-Si]
F08[N-N]
F08[N-O]
F08[N-S]
F08[N-F]
F08[N-Cl]
F08[N-Br]
F08[O-O]
F08[O-S]
F08[O-F]
F08[O-Cl]
F08[S-Cl]
F08[Cl-Cl]
F08[Br-Br]
F09[C-C]
F09[C-N]
F09[C-O]
F09[C-S]
F09[C-P]
F09[C-F]
F09[C-Cl]
F09[C-Br]
F09[C-Si]
F09[N-N]
F09[N-O]
F09[N-Cl]
F09[O-O]
F09[O-S]
F09[O-F]
F09[O-Cl]
F09[O-Br]
F09[S-S]
F09[F-F]
F09[Cl-Cl]
F09[Br-Br]
F10[C-N]
F10[C-O]
F10[C-S]
F10[C-P]
F10[C-F]
F10[C-Cl]
F10[C-Br]
F10[N-N]
F10[N-O]
F10[N-S]
F10[N-F]
F10[N-Cl]
F10[O-O]
F10[O-S]
F10[O-F]
F10[O-Cl]
F10[S-S]
F10[F-Cl]
F10[Cl-Cl]
F10[Br-Br]
Ui
Hy
TPSA(NO)
MLOGP
MLOGP2
LOGPcons
ESOL
SAacc
SAdon
SAscore
