# Supplementary material for: Quantitative read-across structure–property relationship (q-RASPR): a novel approach to estimate the bioaccumulative potential for diverse classes of industrial chemicals in aquatic organisms
Source: Royal Society of Chemistry journal article supplement (doi:10.1039/d4em00374h), 2024-11-01
Supplement: d4em00374h3.pdf [file d4em00374h3.pdf]

## **Quantitative read-across structure-property relationship (q-RASPR): A novel approach to estimate the bioaccumulative potential for diverse classes of industrial chemicals in aquatic organisms**

Prodipta Bhattacharyya, Pabitra Samanta, Ankur Kumar, Shubha Das, Probir Kumar  
Ojha\*

Drug Discovery and Development Laboratory (DDD Lab),  
Department of Pharmaceutical Technology, Jadavpur University,  
Kolkata 700032, India

\*Corresponding author: P K Ojha, Email: [probirojha@yahoo.co.in](mailto:probirojha@yahoo.co.in)

ORCID id: 0000-0003-4796-3915, Phone: +91 8777677004

### **Contents:**

1. Fig. S1: Chemical diversity plot of training and test sets.
2. Fig. S2: Regression coefficient plot of PLS-based q-RSAPR model
3. Fig. S3: Loading plot of PLS-based q-RSAPR model
4. Fig. S4: Score plot of PLS-based q-RSAPR model
5. Fig. S5: Ranking of the compounds of PPDB based on their bioaccumulative potential.
6. Table S1. Detailed list of RASPR descriptors and their definition.
7. Table S2: Top and least 20 compounds based on PLS-based q-RASPR model prediction of PPDB.

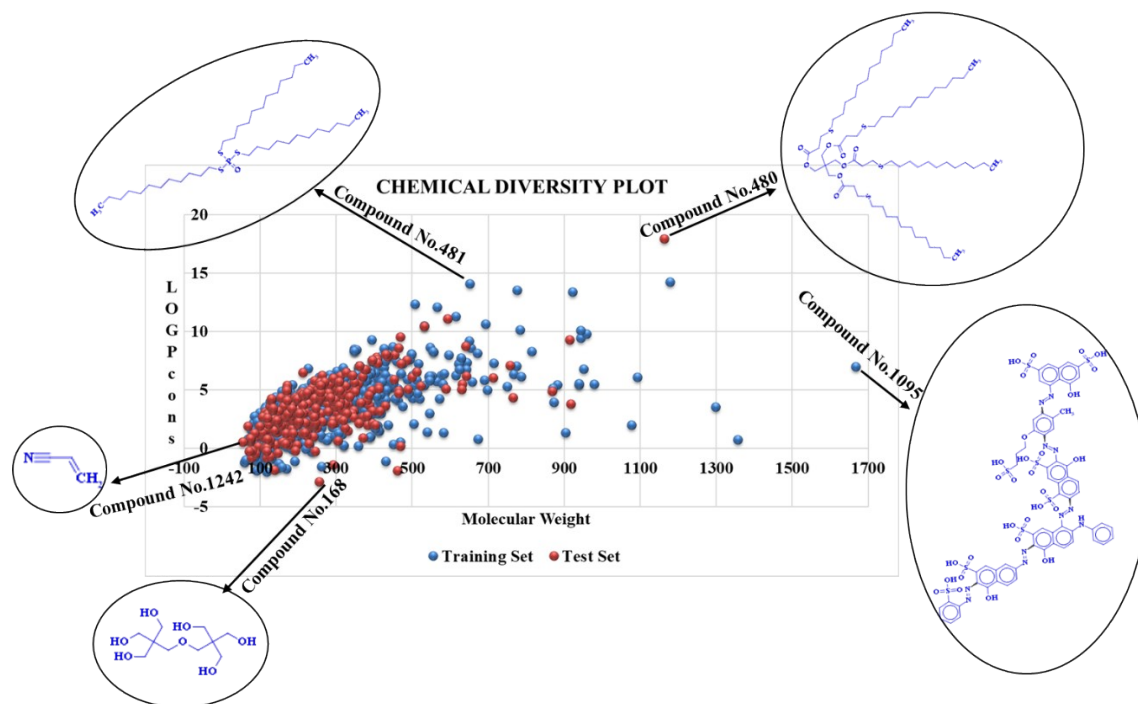

**Fig. S1.** Chemical diversity plot (molecular weight vs LOGPcons) of the training and test sets to check the heterogeneity of the dataset.

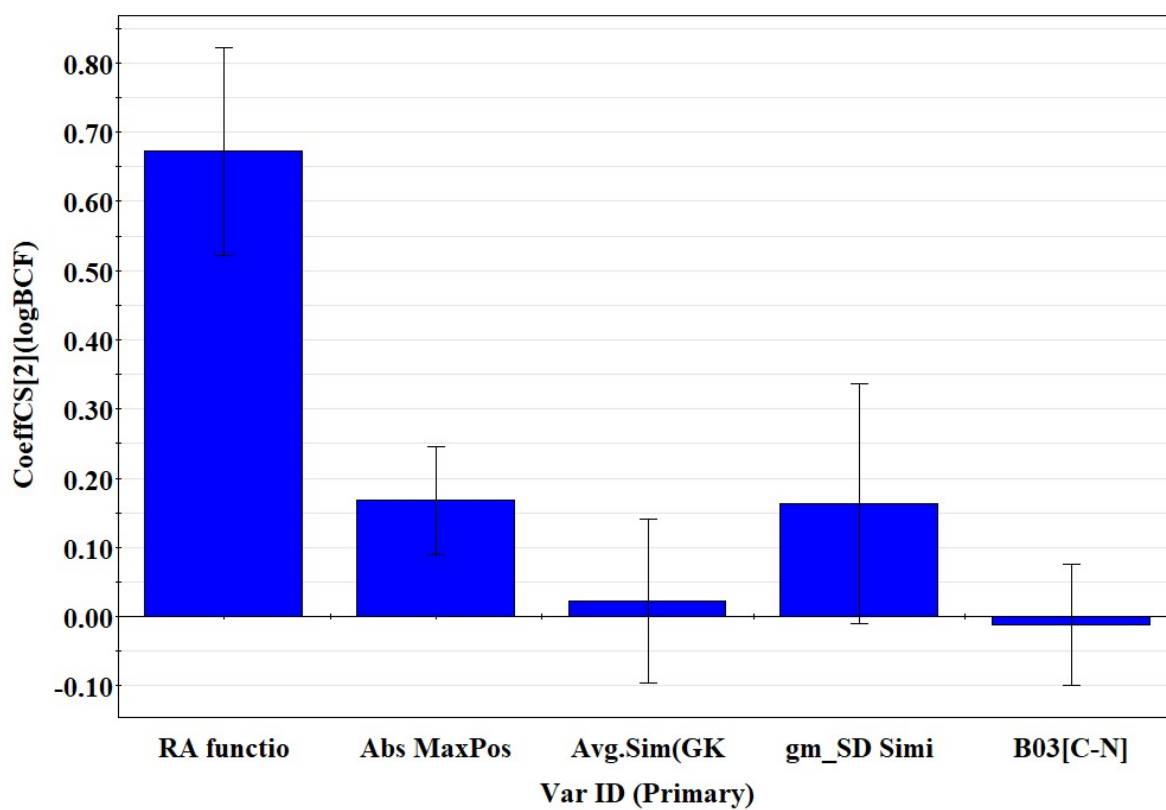

**Fig. S2. Regression coefficient plot of PLS-based q-RSAPR model.**

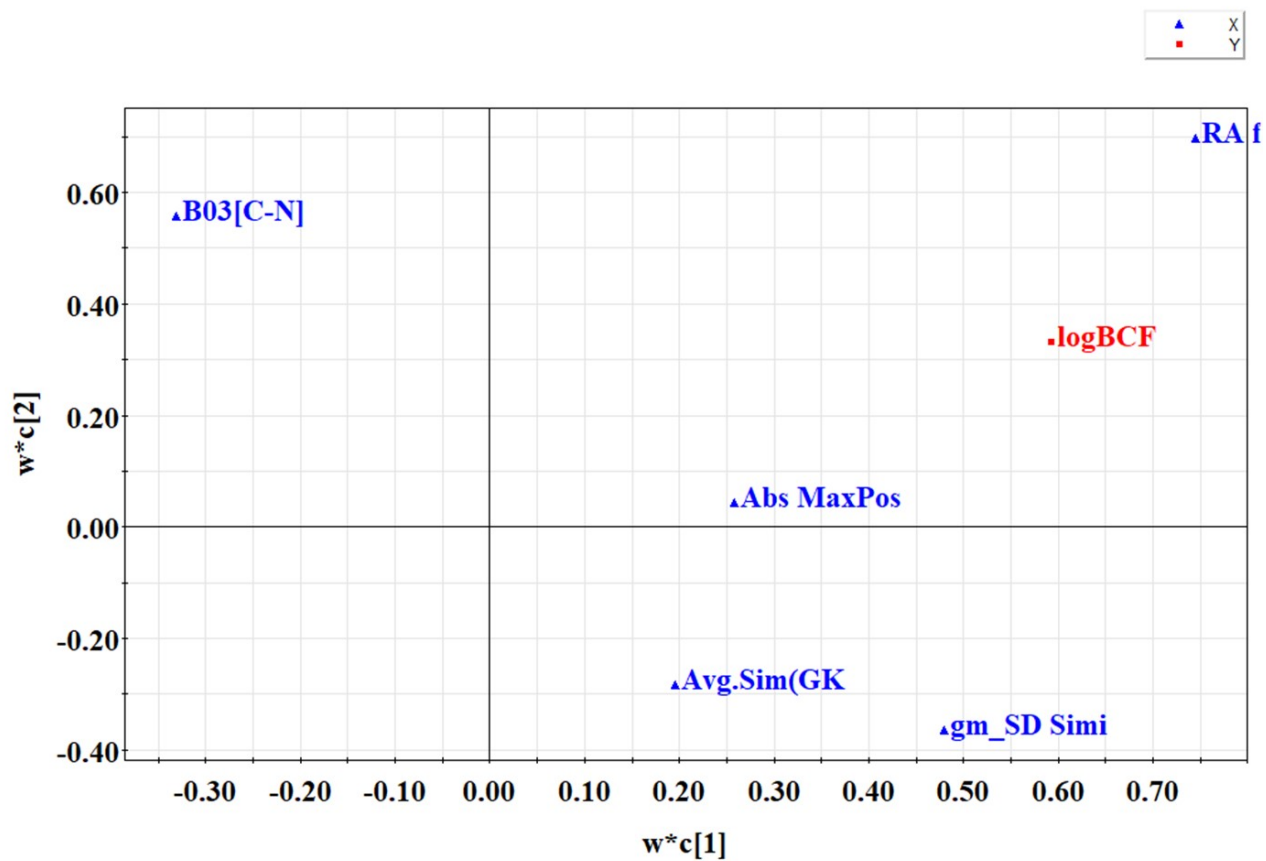

Fig S3. Loading plot of PLS-based q-RSAPR model.

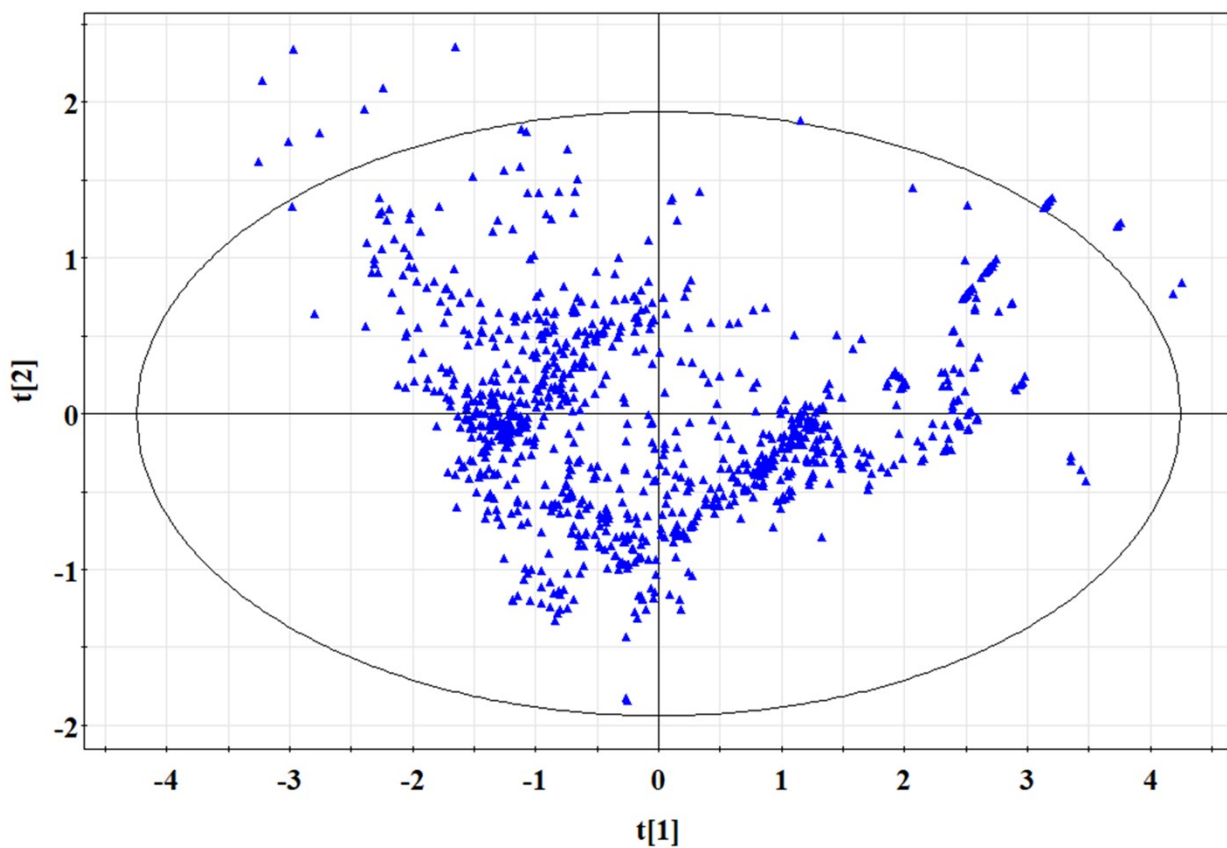

**Fig. S4.** Score plot of PLS-based q-RSAPR model.

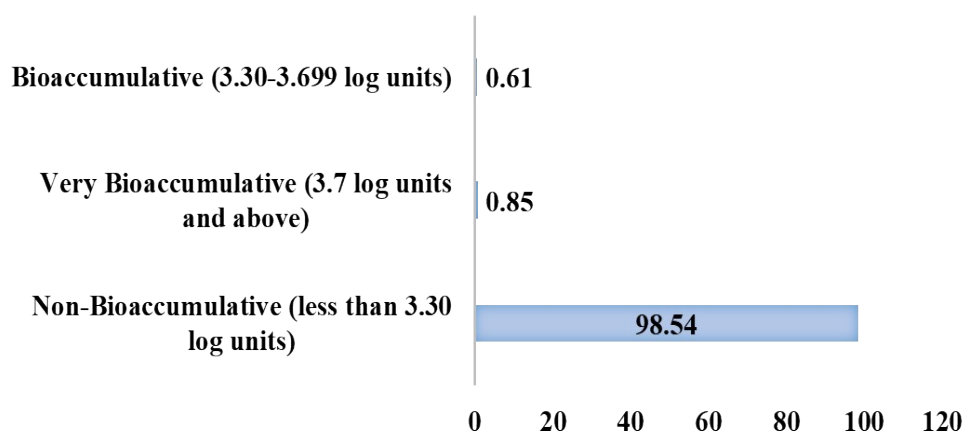

**Fig. S5.** Ranking of the compounds of PPDB based on their bioaccumulative potential.

**Table S1.** Detailed list of RASPR descriptors and their definition.

| SL.NO. | RASPR<br>DESCRIPTORS               | DEFINITIONS                                                                                                                                    |
|--------|------------------------------------|------------------------------------------------------------------------------------------------------------------------------------------------|
| 1      | <i>RA function</i>                 | A composite function derived from Read-Across.                                                                                                 |
| 2      | <i>MaxPos</i>                      | Similarity score of the closest positive source compound (with an observed response value greater than the mean activity of the training set). |
| 3      | <i>MaxNeg</i>                      | Similarity score of the closest negative source compound (with an observed response value less than the mean activity of the training set).    |
| 4      | <i>Abs Maxpos-MaxNeg</i>           | Absolute difference between the <i>MaxPos</i> and <i>Maxneg</i> levels.                                                                        |
| 5      | <i>SE</i>                          | Weighted standard error of the close source compounds' response values.                                                                        |
| 6      | <i>CVact</i>                       | Coefficient of variation of the close source compounds' observed response values.                                                              |
| 7      | <i>SD_Activity</i>                 | Weighted standard deviation of the close source compounds' observed response values.                                                           |
| 8      | <i>CVsim</i>                       | Coefficient and variation of the similarity values of the close source compounds.                                                              |
| 9      | <i>SD_similarity</i>               | The standard deviation of the close source compounds' similarity levels.                                                                       |
| 10     | <i>Pos.Avg.Sim</i>                 | The positive close source compounds' average similarity levels.                                                                                |
| 11     | <i>Neg.Avg.Sim</i>                 | The negative close source compounds ' average similarity levels.                                                                               |
| 12     | <i>Avg.Sim</i>                     | Average similarity level of the close source compounds.                                                                                        |
| 13     | <i>g<sub>m</sub></i>               | A novel concordance measure also known as <i>Banerjee-Roy Coefficient</i>                                                                      |
| 14     | <i>g<sub>m</sub>*SD_Similarity</i> | Product of the <i>g<sub>m</sub></i> and <i>SD similarity</i> levels                                                                            |
| 15     | <i>g<sub>m</sub>*Avg.Sim</i>       | Product of the <i>g<sub>m</sub></i> and <i>Avg.Sim</i> levels                                                                                  |

**Table S2:** Top and least 20 compounds based on PLS-based q-RASPR model prediction of PPDB.

| SL. NO.                                                             | CHEMICAL          | PREDICTION                       | REAL-WORLD DATA                  | SOURCE                                                                                                                                                    |
|---------------------------------------------------------------------|-------------------|----------------------------------|----------------------------------|-----------------------------------------------------------------------------------------------------------------------------------------------------------|
| <b>Top 20 compounds based on PLS-based q-RASPR model prediction</b> |                   |                                  |                                  |                                                                                                                                                           |
| 1                                                                   | Hexachlorobenzene | 5.033<br>( Very Bioaccumulative) | 4.544<br>( Very Bioaccumulative) | <a href="https://sitem.herts.ac.uk/ae/ru/ppdb/">https://sitem.herts.ac.uk/ae/ru/ppdb/</a>                                                                 |
| 2                                                                   | Dienochlor        | 4.893<br>( Very Bioaccumulative) | 6.4313<br>(Very Bioaccumulative) | <a href="https://sitem.herts.ac.uk/ae/ru/ppdb/">https://sitem.herts.ac.uk/ae/ru/ppdb/</a>                                                                 |
| 3                                                                   | 2,4-DEP           | 4.573<br>(Very Bioaccumulative)  | Bioaccumulative                  | <a href="https://pubchem.ncbi.nlm.nih.gov/compound/2_4-Dimethylphenol">https://pubchem.ncbi.nlm.nih.gov/compound/2_4-Dimethylphenol</a>                   |
| 4                                                                   | Tetrasul          | 4.440<br>(Very Bioaccumulative)  | Bioaccumulative                  | <a href="https://www.coastalwiki.org/wiki/Tetrasul">https://www.coastalwiki.org/wiki/Tetrasul</a>                                                         |
| 5                                                                   | Dieldrin          | 4.269<br>(Very Bioaccumulative)  | 4.5440<br>(Very Bioaccumulative) | <a href="https://sitem.herts.ac.uk/ae/ru/ppdb/">https://sitem.herts.ac.uk/ae/ru/ppdb/</a>                                                                 |
| 6                                                                   | Endrin            | 4.269<br>(Very Bioaccumulative)  | 3.6<br>(Bioaccumulative)         | <a href="https://sitem.herts.ac.uk/ae/ru/ppdb/">https://sitem.herts.ac.uk/ae/ru/ppdb/</a>                                                                 |
| 7                                                                   | DDT               | 4.248<br>(Very Bioaccumulative)  | 3.501<br>(Bioaccumulative)       | <a href="https://sitem.herts.ac.uk/ae/ru/ppdb/">https://sitem.herts.ac.uk/ae/ru/ppdb/</a>                                                                 |
| 8                                                                   | O,P'-DDT          | 4.245<br>(Very Bioaccumulative)  | Bioaccumulative                  | <a href="https://pubchem.ncbi.nlm.nih.gov/compound/O_P_-_Ddt">https://pubchem.ncbi.nlm.nih.gov/compound/O_P_-_Ddt</a>                                     |
| 9                                                                   | O,O'-DDT          | 4.241<br>(Very Bioaccumulative)  | No data found                    | -                                                                                                                                                         |
| 10                                                                  | Isobenzan         | 4.153<br>(Very Bioaccumulative)  | Bioaccumulative                  | <a href="https://pubchem.ncbi.nlm.nih.gov/compound/9271#section=Environmental-">https://pubchem.ncbi.nlm.nih.gov/compound/9271#section=Environmental-</a> |

|    |               |                                 |                                 |                                                                                                                                                                                                                                                                            |
|----|---------------|---------------------------------|---------------------------------|----------------------------------------------------------------------------------------------------------------------------------------------------------------------------------------------------------------------------------------------------------------------------|
| 11 | DDD           | 4.120<br>(Very Bioaccumulative) | Very Bioaccumulative            | <a href="https://pubchem.ncbi.nlm.nih.gov/compound/6294#section=Environmental-Bioconcentration&amp;fullscreen=true">Bioconcentration&amp;fullscreen=true<br/>https://pubchem.ncbi.nlm.nih.gov/compound/6294#section=Environmental-Bioconcentration&amp;fullscreen=true</a> |
| 12 | Bromocyclen   | 4.057<br>(Very Bioaccumulative) | No data found                   | -                                                                                                                                                                                                                                                                          |
| 13 | Chlorbenside  | 3.919<br>(Very Bioaccumulative) | No data found                   | -                                                                                                                                                                                                                                                                          |
| 14 | Tridiphane    | 3.781<br>(Very Bioaccumulative) | 3.703<br>(Very Bioaccumulative) | <a href="https://sitem.herts.ac.uk/ae/ru/ppdb/">https://sitem.herts.ac.uk/ae/ru/ppdb/</a>                                                                                                                                                                                  |
| 15 | Chlorbicyclen | 3.692<br>(Bioaccumulative)      | No data found                   | -                                                                                                                                                                                                                                                                          |
| 16 | Leptophos     | 3.663<br>(Bioaccumulative)      | 3.782<br>(Very Bioaccumulative) | <a href="https://sitem.herts.ac.uk/ae/ru/ppdb/">https://sitem.herts.ac.uk/ae/ru/ppdb/</a>                                                                                                                                                                                  |
| 17 | EPBP          | 3.660<br>(Bioaccumulative)      | No data found                   | -                                                                                                                                                                                                                                                                          |
| 18 | Fenchlorphos  | 3.595<br>(Bioaccumulative)      | Bioaccumulative                 | <a href="https://pubchem.ncbi.nlm.nih.gov/compound/Fenchlorphos">https://pubchem.ncbi.nlm.nih.gov/compound/Fenchlorphos</a>                                                                                                                                                |
| 19 | Trichloronate | 3.580<br>(Bioaccumulative)      | Bioaccumulative                 | <a href="https://pubchem.ncbi.nlm.nih.gov/compound/9477#section=Environmental-Fate-Exposure-Summary&amp;fullscreen=true">https://pubchem.ncbi.nlm.nih.gov/compound/9477#section=Environmental-Fate-Exposure-Summary&amp;fullscreen=true</a>                                |
| 20 | Chlorphonium  | 3.493<br>(Bioaccumulative)      | No data found                   | -                                                                                                                                                                                                                                                                          |

---

**Least 20 compounds based on PLS-based q-RASPR model prediction**

---



| SL. NO. | CHEMICAL                | PREDICTION                     | REAL-WORLD DATA                | SOURCE                                                                                                                                                                                              |
|---------|-------------------------|--------------------------------|--------------------------------|-----------------------------------------------------------------------------------------------------------------------------------------------------------------------------------------------------|
| 1       | 2-methoxyethanol        | 0.091<br>(Non-Bioaccumulative) | 0.477<br>Non-Bioaccumulative   | <a href="https://sitem.herts.ac.uk/ae/ru/ppdb/">https://sitem.herts.ac.uk/ae/ru/ppdb/</a>                                                                                                           |
| 2       | Izopamfos               | 0.166<br>(Non-Bioaccumulative) | No data found                  | -                                                                                                                                                                                                   |
| 3       | Butan-1-ol              | 0.189<br>(Non-Bioaccumulative) | Non-Bioaccumulative            | <a href="https://labequipsupply.com/product/butan-1-ol-ar/">https://labequipsupply.com/product/butan-1-ol-ar/</a>                                                                                   |
| 4       | DAEP                    | 0.268<br>(Non-Bioaccumulative) | No data found                  | -                                                                                                                                                                                                   |
| 5       | 2-aminobutane           | 0.296<br>(Non-Bioaccumulative) | Non-Bioaccumulative            | <a href="https://www.fishersci.ch/store/msds?partNumber=11459923&amp;countryCode=CH&amp;language=en">https://www.fishersci.ch/store/msds?partNumber=11459923&amp;countryCode=CH&amp;language=en</a> |
| 6       | Methylene bithiocyanate | 0.304<br>(Non-Bioaccumulative) | Non-Bioaccumulative            | <a href="https://chempak.net/msds/TOLCIDE%20MBT.PDF">https://chempak.net/msds/TOLCIDE%20MBT.PDF</a>                                                                                                 |
| 7       | Ethoate-methyl          | 0.308<br>(Non-Bioaccumulative) | Non-Bioaccumulative            | <a href="https://sitem.herts.ac.uk/ae/ru/ppdb/">https://sitem.herts.ac.uk/ae/ru/ppdb/</a>                                                                                                           |
| 8       | Mevinphos               | 0.318<br>(Non-Bioaccumulative) | 0.505<br>Non-Bioaccumulative   | <a href="https://www.rivm.nl/bibliotheek/rapporten/601714004.pdf">https://www.rivm.nl/bibliotheek/rapporten/601714004.pdf</a>                                                                       |
| 9       | Mepiquat                | 0.321<br>(Non-Bioaccumulative) | 0.301<br>Non-Bioaccumulative   | <a href="https://sitem.herts.ac.uk/ae/ru/ppdb/">https://sitem.herts.ac.uk/ae/ru/ppdb/</a>                                                                                                           |
| 10      | Gliflor                 | 0.322<br>(Non-Bioaccumulative) | No data found                  | -                                                                                                                                                                                                   |
| 11      | Omethoate               | 0.322<br>(Non-Bioaccumulative) | 1.875<br>(Non-Bioaccumulative) | <a href="https://sitem.herts.ac.uk/ae/ru/ppdb/">https://sitem.herts.ac.uk/ae/ru/ppdb/</a>                                                                                                           |
| 12      | Fenuron-TCA             | 0.327<br>(Non-Bioaccumulative) | No data found                  | -                                                                                                                                                                                                   |
| 13      | Amidithion              | 0.328<br>(Non-Bioaccumulative) | No data found                  | -                                                                                                                                                                                                   |
| 14      | Dimethoate              | 0.330                          | 0.903                          | <a href="https://sitem.herts.ac.uk/ae/ru/ppdb/">https://sitem.herts.ac.uk/ae/ru/ppdb/</a>                                                                                                           |

|    |                   |                                |                                |                                                                                                                                                                                                     |
|----|-------------------|--------------------------------|--------------------------------|-----------------------------------------------------------------------------------------------------------------------------------------------------------------------------------------------------|
|    |                   | (Non-Bioaccumulative)          | (Non-Bioaccumulative)          | <a href="https://herts.ac.uk/ae/ru/ppdb/">herts.ac.uk/ae/ru/ppdb/</a>                                                                                                                               |
| 15 | Oxydeprofos       | 0.332<br>(Non-Bioaccumulative) | No data found                  | -                                                                                                                                                                                                   |
| 16 | Methacrifos       | 0.338<br>(Non-Bioaccumulative) | Non-Bioaccumulative            | <a href="https://sitem.herts.ac.uk/ae/ru/ppdb/">https://sitem.herts.ac.uk/ae/ru/ppdb/</a>                                                                                                           |
| 17 | Oxydemeton-methyl | 0.343<br>(Non-Bioaccumulative) | 0.491<br>(Non-Bioaccumulative) | <a href="https://pubchem.ncbi.nlm.nih.gov/compound/4618#section=Environmental-Fate-Exposure-Summary">https://pubchem.ncbi.nlm.nih.gov/compound/4618#section=Environmental-Fate-Exposure-Summary</a> |
| 18 | Methylacetophos   | 0.346<br>(Non-Bioaccumulative) | No data found                  | -                                                                                                                                                                                                   |
| 19 | Acetophos         | 0.361<br>(Non-Bioaccumulative) | 0.301<br>(Non-Bioaccumulative) | <a href="https://pubchem.ncbi.nlm.nih.gov/compound/17041">https://pubchem.ncbi.nlm.nih.gov/compound/17041</a>                                                                                       |
| 20 | Lime sulphur      | 0.361<br>(Non-Bioaccumulative) | Non-Bioaccumulative            | <a href="https://brandt.co/media/6248/brandt-lime-sulfur-sds.pdf">https://brandt.co/media/6248/brandt-lime-sulfur-sds.pdf</a>                                                                       |

---
